# Supplementary material for: Impact of Influenza A Virus Infection on Growth and Metabolism of Suspension MDCK Cells Using a Dynamic Model
Source: MDPI journal article supplement (doi:10.3390/metabo12030239), 2022-03-12
Supplement: s1 [file s1]

**Table S2. Estimated global parameters of the segregated cell growth model with confidence intervals between 0.025-quantile and 0.975-quantile ( $Q_{0.025} - Q_{0.975}$ ) calculated via a bootstrap method with 2500 runs.**

| Parameter     | Value    | $Q_{0.025}-Q_{0.975}$ | Unit                | Parameter    | Value    | $Q_{0.025}-Q_{0.975}$ | Unit  |
|---------------|----------|-----------------------|---------------------|--------------|----------|-----------------------|-------|
| $k_{Glc^x}^m$ | 9.78e+00 | 4.52e+00-<br>1.25e+01 | mmol/L              | $\alpha$     | 3.66e+05 | 3.08e+05-<br>5.93e+05 | -     |
| $\mu_{\max}$  | 4.20e-04 | 3.46e-04-<br>4.73e-04 | 1/min               | $k_d^{\min}$ | 1.93e-12 | 1.93e-14-<br>3.27e-05 | 1/min |
| $Y_{x/Glc^x}$ | 6.02e-09 | 4.96e-09-<br>1.32e-06 | mmol/L/cell         | $k_d^{\max}$ | 9.48e-05 | 6.66e-05-<br>1.02e-04 | 1/min |
| $m_{Glc^x}$   | 4.28e-04 | 1.70e-04-<br>4.49e-04 | mmol/L/ $\mu$ L/min | $\beta$      | 1.46e-19 | 1.46e-21-<br>1.02e-05 | 1/min |
