# Supplementary material for: Impact of Influenza A Virus Infection on Growth and Metabolism of Suspension MDCK Cells Using a Dynamic Model
Source: MDPI journal article supplement (doi:10.3390/metabo12030239), 2022-03-12
Supplement: s1 [file s1]

**Table S3A. Initial conditions of substrates and metabolic by-products with local parameters used for the simulation of Cultivation 1 (Cult1) and Cultivation 2 (Cult2).**

|                  | Cult1   | Cult2    | Unit             |                  | Cult1    | Cult2    | Unit       |
|------------------|---------|----------|------------------|------------------|----------|----------|------------|
| $[Glc^x] (t=0)$  | 19.50   | 19.50    | mmol/L           | $E_{Level}$      | 1.00     | 1.00     | -          |
| $[Gln^x] (t=0)$  | 4.65    | 4.56     | mmol/L           | $V_w$            | 1e-3     | 1e-3     | -          |
| $[Glu^x] (t=0)$  | 1.50    | 1.50     | mmol/L           | $X_1(t=0)$       | 2.19e+05 | 2.35e+05 | cells/mL   |
| $[Lac^x] (t=0)$  | 0.00    | 0.00     | mmol/L           | $X_2(t=0)$       | 1.49+05  | 1.57+05  | cells/mL   |
| $[NH_4^x] (t=0)$ | 0.25    | 0.25     | mmol/L           | $X_3(t=0)$       | 1.50+05  | 1.58+05  | cells/mL   |
| $[Pyr^x] (t=0)$  | 7.66    | 7.86     | mmol/L           | $X_4(t=0)$       | 1.30+05  | 1.30+05  | cells/mL   |
| $d_c$            | 19.58   | 19.58    | $\mu m$          | $X_5(t=0)$       | 1.12+05  | 1.12+05  | cells/mL   |
| $d_m$            | 9.76    | 9.96     | $\mu m$          | $[V_t] (t=48.1)$ | -        | 1.71e08  | Virions/mL |
| $k_{dGln^x}$     | 8.8e-05 | 8.8e-05  | 1/min            | $\rho^1$         | -        | 4.85     | -          |
| $\rho^2$         | -       | 15.61    | -                | $\rho^3$         | -        | 6.00     | -          |
| $k_d^{mininf}$   | -       | 4.9e-08  | 1/min            | $k_d^{maxinf}$   | -        | 2.9e-04  | 1/min      |
| $v_p$            | -       | 6.45e+00 | virions/cell/min |                  |          |          |            |

**Table S3B. Initial conditions used for simulation of the pre-culture of Cultivation 1 (Cult1) and Cultivation 2 (Cult2).**

|                  | Pre-culture | Unit     |                  | Pre-culture | Unit   |
|------------------|-------------|----------|------------------|-------------|--------|
| $X_1(t=0)$       | 1.49+05     | cells/mL | $[G6P] (t=0)$    | 0.12        | mmol/L |
| $X_2(t=0)$       | 1.50+05     | cells/mL | $[F6P] (t=0)$    | 0.037       | mmol/L |
| $X_3(t=0)$       | 1.30+05     | cells/mL | $[R5P] (t=0)$    | 0.016       | mmol/L |
| $X_4(t=0)$       | 1.12+05     | cells/mL | $[UDPGlc] (t=0)$ | 0.19        | mmol/L |
| $X_5(t=0)$       | 1.49+05     | cells/mL | $[F16P] (t=0)$   | 0.035       | mmol/L |
| $[Glc^x] (t=0)$  | 19.50       | mmol/L   | $[3PG] (t=0)$    | 0.15        | mmol/L |
| $[Gln^x] (t=0)$  | 4.65        | mmol/L   | $[PEP] (t=0)$    | 0.013       | mmol/L |
| $[Glu^x] (t=0)$  | 1.50        | mmol/L   | $[Pyr] (t=0)$    | 0.036       | mmol/L |
| $[Lac^x] (t=0)$  | 0.00        | mmol/L   | $[Lac] (t=0)$    | 0.39        | mmol/L |
| $[NH_4^x] (t=0)$ | 0.25        | mmol/L   | $[AcCoA] (t=0)$  | 0.99        | mmol/L |
| $[Pyr^x] (t=0)$  | 7.66        | mmol/L   | $[IsoCit] (t=0)$ | 0.023       | mmol/L |
| $[Glc] (t=0)$    | 0.019       | mmol/L   | $[Gln] (t=0)$    | 1.49        | mmol/L |

**Table S3B. Initial conditions used for simulation of the pre-culture of Cultivation 1 (Cult1) and Cultivation 2 (Cult2) (Continued).**

|               | Pre-culture | Unit   |                | Pre-culture | Unit   |
|---------------|-------------|--------|----------------|-------------|--------|
| $[Glu] (t=0)$ | 1.89        | mmol/L | $[Keto] (t=0)$ | 0.17        | mmol/L |
| $[Suc] (t=0)$ | 0.019       | mmol/L | $[Fum] (t=0)$  | 0.086       | mmol/L |
| $[Mal] (t=0)$ | 0.42        | mmol/L | $[OAA] (t=0)$  | 0.24        | mmol/L |
| $[NH4] (t=0)$ | 5.98        | mmol/L | $[ATP] (t=0)$  | 2.53        | mmol/L |
