# Supplementary material for: Impact of Influenza A Virus Infection on Growth and Metabolism of Suspension MDCK Cells Using a Dynamic Model
Source: MDPI journal article supplement (doi:10.3390/metabo12030239), 2022-03-12
Supplement: s1 [file s1]

**Table S1. Estimated global parameters of the structured intracellular model with confidence intervals between 0.025-quantile and 0.972-quantile ( $Q_{0.025} - Q_{0.975}$ ) calculated via a bootstrap method with 2500 runs.**

| Parameter            | Value    | $Q_{0.025}-Q_{0.975}$ | Unit          | Parameter         | Value    | $Q_{0.025}-Q_{0.975}$ | Unit          |
|----------------------|----------|-----------------------|---------------|-------------------|----------|-----------------------|---------------|
| $v_{HK}^{\max}$      | 6.25e-13 | 6.15e-13-1.21e-12     | mmol/cell/min | $v_{PK}^{\max}$   | 1.44e-12 | 1.25e-12-1.48e-12     | mmol/cell/min |
| $v_{GPI}^{\max}$     | 1.29e-12 | 8.43e-13-4.99e-12     | mmol/cell/min | $v_{LDH}^{\max}$  | 3.79e-09 | 1.73e-09-1.20e-08     | mmol/cell/min |
| $v_{G6PDH}^{\max}$   | 1.06e-14 | 1.03e-14-3.50e-14     | mmol/cell/min | $v_{PDH}^{\max}$  | 5.82e-13 | 1.30e-13-1.14e-12     | mmol/cell/min |
| $v_{UT}^{\max}$      | 9.86e-16 | 6.16e-16-1.70e-15     | mmol/cell/min | $v_{ACO}^{\max}$  | 3.10e-08 | 1.02e-08-4.99e-08     | mmol/cell/min |
| $v_{GLYS}^{\max}$    | 2.44e-17 | 6.32e-18-8.96e-17     | mmol/cell/min | $v_{CL}^{\max}$   | 1.79e-16 | 2.43e-17-9.12e-16     | mmol/cell/min |
| $v_{PFK}^{\max}$     | 7.88e-13 | 6.67e-13-9.96e-13     | mmol/cell/min | $v_{ICDH}^{\max}$ | 6.47e-15 | 2.66e-15-1.39e-14     | mmol/cell/min |
| $v_{TATKF6P}^{\max}$ | 3.45e-14 | 1.56e-14-6.17e-14     | mmol/cell/min | $v_{GS}^{\max}$   | 7.61e-13 | 1.05e-14-1.44e-12     | mmol/cell/min |
| $v_{TATK3PG}^{\max}$ | 7.50e-14 | 3.72e-14-1.18e-13     | mmol/cell/min | $v_{KDH}^{\max}$  | 7.90e-13 | 6.62e-13-9.68e-13     | mmol/cell/min |
| $v_{ALD}^{\max}$     | 3.34e-10 | 1.77e-10-8.27e-10     | mmol/cell/min | $v_{SDH}^{\max}$  | 1.48e-10 | 8.11e-11-3.35e-10     | mmol/cell/min |
| $v_{ENO}^{\max}$     | 2.17e-11 | 1.17e-11-4.00e-11     | mmol/cell/min | $v_{FMA}^{\max}$  | 8.45e-08 | 3.07e-08-1.00e-07     | mmol/cell/min |

**Table S1. Estimated global parameters of the structured intracellular model with confidence intervals between 0.025-quantile and 0.972-quantile ( $Q_{0.025} - Q_{0.975}$ ) calculated via a bootstrap method with 2500 runs (continued).**

| Parameter           | Value    | $Q_{0.025}-Q_{0.975}$ | Unit          | Parameter           | Value    | $Q_{0.025}-Q_{0.975}$ | Unit                |
|---------------------|----------|-----------------------|---------------|---------------------|----------|-----------------------|---------------------|
| $v_{MDH}^{\max}$    | 1.97e-13 | 2.87e-14-<br>3.93e-13 | mmol/cell/min | $v_{GLDH}^{\max}$   | 9.44e-09 | 5.96e-09-<br>2.01e-08 | mmol/cell/min       |
| $v_{dR5P}$          | 2.90e-12 | 1.28e-12-<br>4.85e-12 | mmol/cell/min | $v_{GLNase}^{\max}$ | 1.23e-11 | 4.99e-12-<br>7.20e-11 | mmol/cell/min       |
| $v_{ATPase}^{\max}$ | 4.52e-11 | 3.18e-11-<br>7.64e-11 | mmol/cell/min | $v_{AlaTA}^{\max}$  | 4.69e-12 | 2.26e-12-<br>1.12e-11 | mmol/cell/min       |
| $v_{AAex}^{\max}$   | 4.34e-13 | 3.28e-13-<br>5.80e-13 | mmol/cell/min | $v_{dNH4}$          | 8.58e-11 | 4.17e-11-<br>2.24e-10 | mmol/cell/min       |
| $v_{cUGLC}^{\max}$  | 1.19e-14 | 7.01e-15-<br>2.29e-14 | mmol/cell/min | $v_{Lac^x_{trans}}$ | 1.92e+03 | 4.05e+02-<br>7.6e+03  | mmol/L/ $\mu$ L/min |
| $v_{CS}^{\max}$     | 4.32e-10 | 2.05e-10-<br>9.39e-10 | mmol/cell/min | $v_{Gln^x_{trans}}$ | 2.35e-04 | 1.95e-04-<br>2.72e-04 | mmol/L/ $\mu$ L/min |
| $v_{ME}^{\max}$     | 7.05e-13 | 5.53e-13-<br>9.30e-13 | mmol/cell/min | $v_{Pyr^x_{trans}}$ | 4.31e-04 | 3.90e-04-<br>5.12e-04 | mmol/L/ $\mu$ L/min |
| $v_{PEPCK}^{\max}$  | 2.84e-13 | 1.12e-13-<br>3.36e-13 | mmol/cell/min | $v_{NH4^x_{trans}}$ | 4.25e-04 | 1.09e-04-<br>2.99e-03 | mmol/L/ $\mu$ L/min |
| $v_{PC}^{\max}$     | 1.55e-12 | 5.36e-13-<br>2.40e-12 | mmol/cell/min | $v_{Glu^x_{trans}}$ | 4.70e-05 | 2.15e-05-<br>1.01e-04 | mmol/L/ $\mu$ L/min |
| $v_{AspTA}^{\max}$  | 9.54e-09 | 3.44e-09-<br>3.11e-08 | mmol/cell/min | $k_{HK}^m$          | 5.01e-04 | 2.00e-04-             | mmol/L              |

**Table S1. Estimated global parameters of the structured intracellular model with confidence intervals between 0.025-quantile and 0.972-quantile ( $Q_{0.025} - Q_{0.975}$ ) calculated via a bootstrap method with 2500 runs (continued).**

| Parameter          | Value    | $Q_{0.025}-Q_{0.975}$ | Unit   | Parameter       | Value    | $Q_{0.025}-Q_{0.975}$ | Unit   |
|--------------------|----------|-----------------------|--------|-----------------|----------|-----------------------|--------|
| $k_{GPI}^m$        | 7.97e-02 | 1.37e-02-<br>3.25e-01 | mmol/L | $k_{PyrPK}$     | 3.21e+03 | 8.00e+02-<br>8.29e+03 | mmol/L |
| $k_{GPI}^{eq}$     | 1.55e+00 | 5.63e-01-<br>6.12e+02 | -      | $k_{PyrPDH}$    | 4.97e-07 | 1.56e-07-<br>1.31e-06 | mmol/L |
| $k_{G6PDH}^m$      | 3.39e-03 | 9.91e-04-<br>9.19e-03 | mmol/L | $k_{ACO}^{eq}$  | 1.46e-02 | 1.28e-02-<br>1.61e-02 | -      |
| $k_{UT}^m$         | 7.23e-02 | 1.33e-02-<br>1.82e-01 | mmol/L | $k_{ACO2}^{eq}$ | 2.14e+00 | 1.90e+00-<br>2.38e+00 | -      |
| $k_{TATK6P}^{eq}$  | 7.01e-01 | 2.03e-01-<br>1.73e+00 | -      | $k_{Cit}^m$     | 7.83e+01 | 1.32e+01-<br>2.75e+02 | mmol/L |
| $k_{TATK3PG}^{eq}$ | 6.63e-06 | 1.09e-06-<br>4.82e-05 | -      | $k_{ICDH}^{eq}$ | 2.33e+01 | 1.21e+01-<br>3.30e+01 | -      |
| $k_{PFK}^m$        | 5.67e-03 | 3.12e-03-<br>1.13e-02 | mmol/L | $k_{AAex}^{eq}$ | 6.72e+05 | 1.64e+05-<br>9.00e+05 | -      |
| $k_{F16P}$         | 1.55e-02 | 4.99e-03-<br>3.12e-02 | mmol/L | $k_{FMA}^{eq}$  | 7.71e+00 | 5.63e+00-<br>3.66e+03 | -      |
| $k_{ENO}^{eq}$     | 4.17e+02 | 1.20e+02-<br>3.66e+03 | -      | $k_{FMA}^m$     | 5.54e+03 | 1.49e+03-<br>1.72e+04 | mmol/L |
| $k_{PEPK}^m$       | 1.64e-03 | 8.58e-04-<br>2.36e-03 | mmol/L | $k_{MDH}^m$     | 3.25e+00 | 6.91e-01-             | mmol/L |

**Table S1. Estimated global parameters of the structured intracellular model with confidence intervals between 0.025-quantile and 0.972-quantile ( $Q_{0.025} - Q_{0.975}$ ) calculated via bootstrap method with 2500 runs (continued).**

| Parameter           | Value    | $Q_{0.025}-Q_{0.975}$ | Unit                              | Parameter         | Value    | $Q_{0.025}-Q_{0.975}$ | Unit   |
|---------------------|----------|-----------------------|-----------------------------------|-------------------|----------|-----------------------|--------|
| $k_{xATP}$          | 3.00e+02 | 2.00e+02-4.79e+02     | cell/L/min                        | $k_{OAA}^m$       | 2.31e-04 | 1.92e-05-6.18e-04     | mmol/L |
| $k_{mATP}$          | 1.33e+07 | 1.00e+07-8.81e+07     | cell/L/min                        | $k_{AcCoA}^m$     | 1.10e+05 | 4.29e+04-3.05e+05     | mmol/L |
| $NAD_{basal}$       | 2.33e+00 | 1.26e+00-3.55e+00     | mmol/L                            | $k_{SDH}^m$       | 4.07e+00 | 2.78e-03-6.39e+00     | mmol/L |
| $k_{cUGLC}^m$       | 4.07e+00 | 1.97e+00-6.39e+00     | mmol/L                            | $k_{dR5P}^m$      | 5.25e-01 | 1.96e-01-9.22e-01     | mmol/L |
| $k_{ME}^m$          | 2.27e-01 | 1.53e-01-4.49e-01     | mmol/L                            | $k_{PEPCK}^m$     | 3.93e-09 | 8.42e-10-             | mmol/L |
| $k_{ATP_{ME}}^i$    | 6.89e+04 | 1.90e+04-1.99e+05     | mmol <sup>2</sup> /L <sup>2</sup> | $k_{Pyr_{PC}}^m$  | 7.62e-02 | 9.36e-03-1.24e-01     | mmol/L |
| $k_{\mu}^i$         | 1.31e+03 | 3.87e+02-2.75e+03     | mmol/L                            | $k_{ME}^{eq}$     | 1.84e+04 | 4.28e+02-6.93e+04     | -      |
| $k_{Glu_{AlaTA}}^i$ | 1.89e-01 | 9.75e-02-3.61e-01     | mmol <sup>2</sup> /L <sup>2</sup> | $k_{KDH}^m$       | 1.14e-01 | 7.42e-02-2.06e-01     | mmol/L |
| $k_{Glu_{GS}}^m$    | 2.33e-03 | 8.16e-04-2.51e-02     | mmol/L                            | $k_{OAA_{AspTA}}$ | 1.15e+03 | 2.89e+02-3.05e+03     | mmol/L |
| $k_{ICDH}^m$        | 1.52e-07 | 5.07e-08-5.63e-07     | mmol/L                            | $k_{Glu_{AspTA}}$ | 2.70e-03 | 7.99e-04-             | mmol/L |

**Table S1. Estimated global parameters of the structured intracellular model with confidence intervals between 0.025-quantile and 0.972-quantile ( $Q_{0.025} - Q_{0.975}$ ) calculated via a bootstrap method with 2500 runs (continued).**

| Parameter          | Value    | $Q_{0.025}-Q_{0.975}$ | Unit   | Parameter                | Value    | $Q_{0.025}-Q_{0.975}$ | Unit   |
|--------------------|----------|-----------------------|--------|--------------------------|----------|-----------------------|--------|
| $k_{Keto_{AspTA}}$ | 1.93e+00 | 4.91e-01-<br>4.57e+05 | mmol/L | $k_{TATKF6P}^m$          | 4.41e-07 | 1.10e-07-<br>1.60e-06 | mmol/L |
| $k_{Glu_{GLDH}}$   | 6.27e-05 | 2.57e-05-<br>9.71e-05 | mmol/L | $k_{GLDH}^m$             | 3.32e+04 | 1.44e+04-<br>6.37e+04 | mmol/L |
| $k_{Glnase}^m$     | 1.69e-04 | 2.99e-05-<br>2.59e-02 | mmol/L | $k_{ATP_{HK}}^m$         | 2.36e-06 | 7.20e-07-<br>7.32e-06 | mmol/L |
| $k_{GLDH}^{eq}$    | 4.51e-01 | 1.25e-01-<br>1.71e+00 | -      | $k_{ATP_{ALD}}^m$        | 7.40e+04 | 1.93e+04-<br>2.31e+05 | mmol/L |
| $k_{ALD}^{eq}$     | 8.95e+03 | 2.59e+03-<br>4.02e+04 | -      | $k_{3PG_{ALD}}^m$        | 1.47e-04 | 4.57e-05-<br>2.99e-04 | mmol/L |
| $k_{PFK}^a$        | 3.39e+00 | 2.88e+00-<br>4.28e+00 | mmol/L | $k_{ATP_{PC}}^m$         | 4.06e-09 | 4.39e-10-<br>1.16e-08 | mmol/L |
| $k_{ATPase}^m$     | 1.37e+01 | 8.79e+00-<br>2.24e+01 | mmol/L | $k_{ATP_{PDH}}^m$        | 3.94e+02 | 2.16e+02-<br>7.31e+02 | mmol/L |
| $k_{3PG}$          | 1.35e+00 | 6.39e-01-<br>2.94e+00 | mmol/L | $k_{Glu^x}$              | 2.47e+01 | 1.46e+01-<br>4.57e+01 | mmol/L |
| $k_{PEP_{ENO}}$    | 1.01e-02 | 3.53e-03-<br>1.90e-02 | mmol/L | $k_{Glu}$                | 2.00e+03 | 4.71e+02-<br>1.03e+04 | mmol/L |
| $k_{TATK3PG}^m$    | 6.59e-09 | 5.14e-10-<br>2.77e-08 | mmol/L | $k_{Glu_{trans}^x}^{eq}$ | 3.56e-05 | 4.05e-06-<br>9.25e-05 | -      |

**Table S1. Estimated global parameters of the structured intracellular model with confidence intervals between 0.025-quantile and 0.972-quantile ( $Q_{0.025} - Q_{0.975}$ ) calculated via a bootstrap method with 2500 runs (continued).**

| Parameter                | Value    | $Q_{0.025}-Q_{0.975}$ | Unit                              | Parameter           | Value    | $Q_{0.025}-Q_{0.975}$ | Unit                              |
|--------------------------|----------|-----------------------|-----------------------------------|---------------------|----------|-----------------------|-----------------------------------|
| $k_{Gln^x}$              | 1.05e+01 | 4.63e+00-4.86e+01     | mmol/L                            | $k_{Lac_{trans}}$   | 2.73e+00 | 1.46e+00-7.52e+00     | mmol/L                            |
| $k_{Pyr_{trans}}^m$      | 2.55e-04 | 3.24e-05-1.07e-03     | mmol/L                            | $k_{Lac_{trans}^x}$ | 7.97e+01 | 2.68e+01-1.42e+02     | mmol/L                            |
| $\omega$                 | 8.57e-06 | 2.66e-06-2.20e-05     | -                                 | $k_{Pyr_{LDH}}$     | 6.37e-02 | 3.21e-02-1.24e-01     | mmol/L                            |
| $k_{AspTA}^m$            | 4.25e+03 | 2.81e+02-1.14e+04     | mmol/L                            | $k_{Lac_{LDH}}$     | 4.39e-02 | 2.71e-02-1.01e-01     | mmol/L                            |
| $k_{ATP_{GS}}^m$         | 1.88e+01 | 1.05e+01-1.17e+02     | mmol/L                            | $k_{cPyr}$          | 9.10e-06 | 1.48e-06-5.27e-05     | mmol <sup>2</sup> /L <sup>2</sup> |
| $k_{ATP_{Glnase}}^i$     | 2.81e-02 | 1.16e-02-7.50e-02     | mmol <sup>2</sup> /L <sup>2</sup> | $k_{Pyr_{LDH}}^a$   | 3.07e-05 | 1.07e-05-9.84e-05     | -                                 |
| $k_{OAA_{SDH}}^i$        | 1.56e-01 | 6.11e-02-2.85e-01     | mmol <sup>2</sup> /L <sup>2</sup> | $k_{Glu_{LDH}}$     | 2.08e+01 | 8.97e+00-6.08e+01     | mmol <sup>2</sup> /L <sup>2</sup> |
| $k_{GLYS}^m$             | 8.96e+05 | 1.95e+05-9.00e+05     | mmol/L                            | $k_{Glu_{LDH}}^i$   | 1.73e+01 | 6.41e+00-9.50e+01     | -                                 |
| $k_{ATP_{CL}}^m$         | 3.08e+04 | 3.47e+03-9.44e+04     | mmol/L                            | $k_{LDH}^{eq}$      | 1.01e+01 | 5.26e+00-1.84e+01     | -                                 |
| $k_{Lac_{trans}^x}^{eq}$ | 3.73e+01 | 1.88e+01-5.88e+01     | -                                 | $k_{dNH4}^m$        | 8.12e+02 | 2.48e+02-1.65e+03     | mmol/L                            |

**Table S1. Estimated global parameters of the structured intracellular model with confidence intervals between 0.025-quantile and 0.972-quantile ( $Q_{0.025} - Q_{0.975}$ ) calculated via a bootstrap method with 2500 runs (continued).**

| Parameter                 | Value    | $Q_{0.025}-Q_{0.975}$ | Unit   | Parameter     | Value    | $Q_{0.025}-Q_{0.975}$ | Unit   |
|---------------------------|----------|-----------------------|--------|---------------|----------|-----------------------|--------|
| $k_{ATP_{dNH_4}}^a$       | 5.27e-03 | 1.35e-03-<br>3.66e-02 | mmol/L | $k_{NH_4}$    | 1.92e-02 | 7.14e-03-<br>3.36e-02 | mmol/L |
| $k_{NH_4^x}$              | 2.45e+00 | 1.22e+00-<br>7.33e+00 | mmol/L | $k_{AlaTA}^m$ | 1.68e-01 | 7.59e-02-<br>4.91e-01 | mmol/L |
| $k_{NH_4^x_{trans}}^{eq}$ | 7.46e-06 | 3.51e-06-<br>2.28e-05 | -      |               |          |                       |        |
