# Supplementary material for: Impact of Influenza A Virus Infection on Growth and Metabolism of Suspension MDCK Cells Using a Dynamic Model
Source: MDPI journal article supplement (doi:10.3390/metabo12030239), 2022-03-12
Supplement: s1 [file s1]

**List of symbols.**

| Symbol           | Unit          | Description                                                     |
|------------------|---------------|-----------------------------------------------------------------|
| $\Theta$         | -             | unit step function                                              |
| $\mathcal{E}$    | -             | unit step function                                              |
| $\Phi_{1,...,3}$ | -             | exponential step function                                       |
| $\rho_{1,...,3}$ | -             | constant to adjust the exponential step function                |
| $\omega$         | -             | constant to adjust ammonium release from amino acid degradation |
| $\mu_{\max}$     | 1/min         | maximum cell-specific growth rate                               |
| $\mu$            | 1/min         | cell-specific growth rate                                       |
| $\alpha$         | -             | constant adjusting inhibition factor                            |
| $\beta$          | 1/min         | switch constant for cell death rate                             |
| $\overline{d}$   | $\mu\text{m}$ | mean cell diameter                                              |
| $b_{\text{NAD}}$ | -             | adjustable parameter for influence of NAD/NADH                  |
| $d_c$            | $\mu\text{m}$ | critical cell diameter                                          |
| $d_m$            | $\mu\text{m}$ | minimum cell diameter                                           |
| $f$              | -             | growth inhibition factor                                        |
| $N^c$            | -             | number of cell classes                                          |
| $v_e^{\max}$     | L/cell/min    | cell number-specific activity of enzyme e                       |

**List of symbols (continued).**

| Symbol                 | Unit                | Description                                            |
|------------------------|---------------------|--------------------------------------------------------|
| $v_{Glu_{trans}}^x$    | mmol/L/ $\mu$ L/min | cell volume-specific transport rate of Glu             |
| $v_{HK}^{max}$         | mmol/cell/min       | cell number-specific maximum activity of HK            |
| $v_{GPI}^{max}$        | mmol/cell/min       | cell number-specific maximum activity of GPI           |
| $v_{G6PDH}^{max}$      | mmol/cell/min       | cell number-specific maximum activity of G6PDH         |
| $v_{Lac_{trans}}^x$    | mmol/L/ $\mu$ L/min | cell volume-specific transport rate of Lac             |
| $v_{Gln_{trans}}^x$    | mmol/L/ $\mu$ L/min | cell volume-specific transport rate of Gln             |
| $v_{NH_4^+_{trans}}^x$ | mmol/L/ $\mu$ L/min | cell volume-specific transport rate of NH <sub>4</sub> |
| $v_{dR5P}^{max}$       | mmol/cell/min       | cell number-specific maximum activity of R5P           |
| $v_{UT}^{max}$         | mmol/cell/min       | cell number-specific maximum activity of UT            |
| $v_{GLYS}^{max}$       | mmol/cell/min       | cell number-specific maximum activity of GLYS          |
| $v_{PFK}^{max}$        | mmol/cell/min       | cell number-specific maximum activity of PFK           |
| $v_{TATKF6P}^{max}$    | mmol/cell/min       | cell number-specific maximum activity of TATKF6P       |
| $v_{TATK3PG}^{max}$    | mmol/cell/min       | cell number-specific maximum activity of TATK3GP       |
| $v_{ALD}^{max}$        | mmol/cell/min       | cell number-specific maximum activity of ALD           |
| $v_{Pyr_{trans}}^x$    | mmol/L/ $\mu$ L/min | cell volume-specific transport rate of Pyr             |

**List of symbols (continued).**

| Symbol              | Unit          | Description                                     |
|---------------------|---------------|-------------------------------------------------|
| $v_{ENO}^{\max}$    | mmol/cell/min | cell number-specific maximum activity of ENO    |
| $v_{PK}^{\max}$     | mmol/cell/min | cell number-specific maximum activity of PK     |
| $v_{LDH}^{\max}$    | mmol/cell/min | cell number-specific maximum activity of LDH    |
| $v_{ACO}^{\max}$    | mmol/cell/min | cell number-specific maximum activity of PDH    |
| $v_{CL}^{\max}$     | mmol/cell/min | cell number-specific maximum activity of ACO    |
| $v_{ICDH}^{\max}$   | mmol/cell/min | cell number-specific maximum activity of CL     |
| $v_{GS}^{\max}$     | mmol/cell/min | cell number-specific maximum activity of ICDH   |
| $v_{KDH}^{\max}$    | mmol/cell/min | cell number-specific maximum activity of GS     |
| $v_{SDH}^{\max}$    | mmol/cell/min | cell number-specific maximum activity of SDH    |
| $v_{FMA}^{\max}$    | mmol/cell/min | cell number-specific maximum activity of FMA    |
| $v_{MDH}^{\max}$    | mmol/cell/min | cell number-specific maximum activity of MDH    |
| $v_{ATPase}^{\max}$ | mmol/cell/min | cell number-specific maximum activity of ATPase |
| $v_{AAex}^{\max}$   | mmol/cell/min | cell number-specific maximum activity of AAex   |
| $v_{cUGLC}^{\max}$  | mmol/cell/min | cell number-specific maximum activity of UGLC   |
| $v_{CS}^{\max}$     | mmol/cell/min | cell number-specific maximum activity of CS     |
| $v_{ME}^{\max}$     | mmol/cell/min | cell number-specific maximum activity of ME     |

**List of symbols (continued).**

| Symbol              | Unit          | Description                                              |
|---------------------|---------------|----------------------------------------------------------|
| $v_{PECK}^{\max}$   | mmol/cell/min | cell number-specific maximum activity of PPECK           |
| $v_{PC}^{\max}$     | mmol/cell/min | cell number-specific maximum activity of PC              |
| $v_{AlaTA}^{\max}$  | mmol/cell/min | cell number-specific maximum activity of AlaTA           |
| $v_{AspTA}^{\max}$  | mmol/cell/min | cell number-specific maximum activity of AspTA           |
| $v_{GLDH}^{\max}$   | mmol/cell/min | cell number-specific maximum activity of GLDH            |
| $v_{GLNase}^{\max}$ | mmol/cell/min | cell number-specific maximum activity of GLNase          |
| $v_{dNH4}$          | mmol/cell/min | cell number-specific maximum activity of NH4 degradation |
| $k_{HK}^m$          | mmol/L        | affinity constant of HK                                  |
| $k_{GPI}^m$         | mmol/L        | affinity constant of GPI                                 |
| $k_{GPI}^{eq}$      | -             | equilibrium constant of GPI                              |
| $k_{G6PDH}^m$       | mmol/L        | affinity constant of G6PDH                               |
| $k_{UT}^m$          | mmol/L        | affinity constant of UT                                  |
| $k_{TATKF6P}^{eq}$  | -             | equilibrium constant of TATKF6P                          |
| $k_{TATK3PG}^{eq}$  | -             | equilibrium constant of TATK3PG                          |

**List of symbols (continued).**

| Symbol          | Unit       | Description                                |
|-----------------|------------|--------------------------------------------|
| $k_{PFK}^m$     | mmol/L     | affinity constant of PFK                   |
| $k_{F16P}$      | mmol/L     | affinity constant of ALD for F16P          |
| $k_{ENO}^{eq}$  | -          | equilibrium constant of ENO                |
| $k_{PEP_{PK}}$  | mmol/L     | affinity constant of PK for PEP            |
| $k_{Pyr_{PK}}$  | mmol/L     | affinity constant of PK for Pyr            |
| $k_{Pyr_{PDH}}$ | mmol/L     | affinity constant of PDH for Pyr           |
| $k_{ACO}^{eq}$  | -          | equilibrium constant of ACO                |
| $k_{ACO2}^{eq}$ | -          | equilibrium constant of ACO                |
| $k_{Cit}^m$     | mmol/L     | affinity constant of CL for Cit            |
| $k_{ICDH}^{eq}$ | -          | equilibrium constant of ICDH               |
| $k_{AAex}^{eq}$ | -          | equilibrium constant of AAex               |
| $k_{FMA}^{eq}$  | -          | equilibrium constant of FMA                |
| $k_{FMA}^m$     | mmol/L     | affinity constant of FMA                   |
| $k_{MDH}^m$     | mmol/L     | affinity constant of MDH                   |
| $k_{x_{ATP}}$   | cell/L/min | specific ATP consumption related to growth |

**List of symbols (continued).**

| Symbol           | Unit                              | Description                                     |
|------------------|-----------------------------------|-------------------------------------------------|
| $k_{mATP}$       | cell/L/min                        | specific ATP consumption related to maintenance |
| $NAD_{basal}$    | mmol/L                            | adjustable parameter for influence of NAD/NADH  |
| $k_{cUGLC}^m$    | mmol/L                            | affinity constant of a general enzyme to UDPGlc |
| $k_{ME}^m$       | mmol/L                            | affinity constant of ME                         |
| $k_{ATP_{ME}}^i$ | mmol <sup>2</sup> /L <sup>2</sup> | inhibition constant of ME from ATP              |
| $k_{\mu}^i$      | mmol/L                            | growth related inhibition constant of ALD       |
| $k_{Glu_{GS}}^m$ | mmol/L                            | affinity constant of GS for Glu                 |
| $k_{ICDH}^m$     | mmol/L                            | affinity constant of ICDH                       |
| $k_{OAA}^m$      | mmol/L                            | affinity constant of CS for OAA                 |
| $k_{AcCoA}^m$    | mmol/L                            | affinity constant of CS for AcCoA               |
| $k_{SDH}^m$      | mmol/L                            | affinity constant of SDH                        |
| $k_{dR5P}^m$     | mmol/L                            | affinity constant of a general enzyme to R5P    |
| $k_{PEPCK}^m$    | mmol/L                            | affinity constant of PEPCK                      |
| $k_{Pyr_{PC}}^m$ | mmol/L                            | affinity constant of PC for Pyr                 |

**List of symbols (continued).**

| Symbol             | Unit   | Description                         |
|--------------------|--------|-------------------------------------|
| $k_{ME}^{eq}$      | -      | equilibrium constant of ME          |
| $k_{KDH}^m$        | mmol/L | affinity constant of KDH            |
| $k_{OAA_{AspTA}}$  | mmol/L | affinity constant of AspTA for OAA  |
| $k_{Glu_{AspTA}}$  | mmol/L | affinity constant of AspTA for Glu  |
| $k_{Keto_{AspTA}}$ | mmol/L | affinity constant of AspTA for Keto |
| $k_{Glu_{GLDH}}$   | mmol/L | affinity constant of LDH for Glu    |
| $k_{Glnase}^m$     | mmol/L | affinity constant of GLNase         |
| $k_{GLDH}^{eq}$    | -      | equilibrium constant of GLDH        |
| $k_{ALD}^{eq}$     | -      | equilibrium constant of ALD         |
| $k_{PFK}^a$        | mmol/L | activation constant of PFK          |
| $k_{ATPase}^m$     | mmol/L | affinity constant of ATPase         |
| $k_{3PG}$          | mmol/L | affinity constant of ENO for 3PG    |
| $k_{PEP_{ENO}}$    | mmol/L | affinity constant of ENO for PEP    |
| $k_{TATK3PG}^m$    | mmol/L | affinity constant of TATK3PG        |
| $k_{TATKF6P}^m$    | mmol/L | affinity constant of TATKF6P        |

**List of symbols (continued).**

| Symbol                   | Unit                              | Description                                                         |
|--------------------------|-----------------------------------|---------------------------------------------------------------------|
| $k_{GLDH}^m$             | mmol/L                            | affinity constant of GLDH                                           |
| $k_{ATP_{HK}}^m$         | mmol/L                            | affinity constant of HK for ATP                                     |
| $k_{ATP_{ALD}}^m$        | mmol/L                            | affinity constant of ALD for ATP                                    |
| $k_{3PG_{ALD}}^m$        | mmol/L                            | affinity constant of ALD for 3PG                                    |
| $k_{ATP_{PC}}^m$         | mmol/L                            | affinity constant of PC for ATP                                     |
| $k_{ATP_{PDH}}^m$        | mmol/L                            | affinity constant of PDH for ATP                                    |
| $k_{Glu^x}$              | mmol/L                            | direct binding affinity constant for extracellular Glu              |
| $k_{Glu}$                | mmol/L                            | direct binding affinity constant for Glu transporter                |
| $k_{Glu_{trans}^x}^{eq}$ | -                                 | direct biding equilibrium constant for Glu transporter              |
| $k_{Gln^x}$              | mmol/L                            | Direct binding (simplified) affinity constant for extracellular Gln |
| $k_{Pyr_{trans}^x}^m$    | mmol/L                            | affinity constant of extracellular Pyr transporter                  |
| $k_{AspTA}^m$            | mmol/L                            | affinity constant of AspTA                                          |
| $k_{ATP_{GS}}^m$         | mmol/L                            | affinity constant of GS for ATP                                     |
| $k_{ATP_{Glnase}}^i$     | mmol <sup>2</sup> /L <sup>2</sup> | inhibition constant of GLNase from ATP                              |



**List of symbols (continued).**

| Symbol                 | Unit                              | Description                                            |
|------------------------|-----------------------------------|--------------------------------------------------------|
| $k_{OAA_{SDH}}^i$      | mmol <sup>2</sup> /L <sup>2</sup> | inhibition constant of SDH from ATP                    |
| $k_{GLYS}^m$           | mmol/L                            | affinity constant of GLYS                              |
| $k_{ATP_{CL}}^m$       | mmol/L                            | affinity constant of CL for ATP                        |
| $k_{Lac_{trans}}^{eq}$ | -                                 | equilibrium constant of transporter for Lac            |
| $k_{Lac_{trans}}$      | mmol/L                            | affinity constant of transporter for Lac               |
| $k_{Lac_{trans}^x}$    | mmol/L                            | affinity constant of transporter for extracellular Lac |
| $k_{Pyr_{LDH}}$        | mmol/L                            | affinity constant of LDH for Pyr                       |
| $k_{Lac_{LDH}}$        | mmol/L                            | affinity constant of LDH for Lac                       |
| $k_{cPyr}$             | mmol <sup>2</sup> /L <sup>2</sup> | activation constant of LDH from Pyr                    |
| $k_{Pyr_{LDH}}^a$      | -                                 | activation constant of LDH from Pyr                    |
| $k_{Glu_{LDH}}$        | mmol <sup>2</sup> /L <sup>2</sup> | inhibition constant of LDH from Glu                    |
| $k_{Glu_{LDH}}^i$      | -                                 | inhibition constant of LDH from Glu                    |
| $k_{LDH}^{eq}$         | -                                 | equilibrium constant of LDH                            |
| $k_{dNH4}^m$           | mmol/L                            | affinity constant of general enzyme for NH4            |
| $k_{ATP_{dNH4}}^a$     | mmol/L                            | activation constant of NH4 degradation from ATP        |

**List of symbols (continued).**

| Symbol                                         | Unit                             | Description                                                     |
|------------------------------------------------|----------------------------------|-----------------------------------------------------------------|
| $k_{\text{NH}_4^x}$                            | mmol/L                           | direct binding affinity constant for $\text{NH}_4$ transporter  |
| $k_{\text{NH}_4^x_{\text{trans}}}^{\text{eq}}$ | -                                | direct biding equilibrium constant of $\text{NH}_4$ transporter |
| $k_{\text{NH}_4}$                              | mmol/L                           | direct binding affinity constant for $\text{NH}_4$ transporter  |
| $k_{\text{AlaTA}}^m$                           | mmol/L                           | affinity constant of AlaTA                                      |
| $k_{\text{Glu}_{\text{AlaTA}}}^i$              | $\text{mmol}^2/\text{L}^2$       | inhibition constant of AlaTA from Glu                           |
| $k_{\text{Glc}^x}^m$                           | mmol/L                           | Monod constant for extracellular Glc                            |
| $k_d^{\min}$                                   | 1/min                            | basal cell death rate                                           |
| $k_d^{\max}$                                   | 1/min                            | maximum cell death rate                                         |
| $k_d^{\min\text{inf}}$                         | 1/min                            | basal cell death rate of infected cells                         |
| $k_d^{\max\text{inf}}$                         | 1/min                            | maximum cell death rate of infected cells                       |
| $k_{d\text{Gln}^x}$                            | 1/min                            | spontaneous glutamine degradation rate                          |
| $m_{\text{Glc}^x}$                             | mmol/L/ $\mu\text{L}/\text{min}$ | maintenance related glucose consumption rate                    |
| $K_e^{\max}$                                   | mmol/L/min                       | cell volume-specific reaction rate of enzyme e                  |
| $K_{\text{HK}}^{\max}$                         | mmol/L/min                       | cell volume-specific reaction rate of enzyme HK                 |
| $K_{\text{GPI}}^{\max}$                        | mmol/L/min                       | cell volume-specific reaction rate of enzyme GPI                |

**List of symbols (continued).**

| Symbol               | Unit       | Description                                                                   |
|----------------------|------------|-------------------------------------------------------------------------------|
| $K_{G6PDH}^{\max}$   | mmol/L/min | cell volume-specific reaction rate of enzyme G6PDH                            |
| $K_{dR5P}^{\max}$    | mmol/L/min | cell volume-specific reaction rate of general enzyme of R5P degradation       |
| $K_{UT}^{\max}$      | mmol/L/min | cell volume-specific reaction rate of enzyme UT                               |
| $K_{GLYS}^{\max}$    | mmol/L/min | cell volume-specific reaction rate of enzyme GLYS                             |
| $K_{PFK}^{\max}$     | mmol/L/min | cell volume-specific reaction rate of enzyme PFK                              |
| $K_{TATKF6P}^{\max}$ | mmol/L/min | cell volume-specific reaction rate of transaldolase and transketolase for F6P |
| $K_{TATK3PG}^{\max}$ | mmol/L/min | cell volume-specific reaction rate of transaldolase and transketolase for 3PG |
| $K_{ALD}^{\max}$     | mmol/L/min | cell volume-specific reaction rate of enzyme ALD                              |
| $K_{ENO}^{\max}$     | mmol/L/min | cell volume-specific reaction rate of enzyme ENO                              |
| $K_{PK}^{\max}$      | mmol/L/min | cell volume-specific reaction rate of enzyme PK                               |
| $K_{LDH}^{\max}$     | mmol/L/min | cell volume-specific reaction rate of enzyme LDH                              |
| $K_{PDH}^{\max}$     | mmol/L/min | cell volume-specific reaction rate of enzyme PDH                              |
| $K_{dNH4}^{\max}$    | mmol/L/min | cell volume-specific reaction rate of general enzyme for NH4 degradation      |
| $K_{ACO}^{\max}$     | mmol/L/min | cell volume-specific reaction rate of enzyme ACO                              |
| $K_{CL}^{\max}$      | mmol/L/min | cell volume-specific reaction rate of enzyme CL                               |

**List of symbols (continued).**

| Symbol              | Unit       | Description                                         |
|---------------------|------------|-----------------------------------------------------|
| $K_{ICDH}^{\max}$   | mmol/L/min | cell volume-specific reaction rate of enzyme ICDH   |
| $K_{GS}^{\max}$     | mmol/L/min | cell volume-specific reaction rate of enzyme GS     |
| $K_{KDH}^{\max}$    | mmol/L/min | cell volume-specific reaction rate of enzyme KDH    |
| $K_{SDH}^{\max}$    | mmol/L/min | cell volume-specific reaction rate of enzyme SDH    |
| $K_{FMA}^{\max}$    | mmol/L/min | cell volume-specific reaction rate of enzyme FMA    |
| $K_{MDH}^{\max}$    | mmol/L/min | cell volume-specific reaction rate of enzyme MDH    |
| $K_{ATPase}^{\max}$ | mmol/L/min | cell volume-specific reaction rate of enzyme ATPase |
| $K_{AAex}^{\max}$   | mmol/L/min | cell volume-specific reaction rate of enzyme AAex   |
| $K_{cUGLC}^{\max}$  | mmol/L/min | cell volume-specific reaction rate of enzyme UGLC   |
| $K_{CS}^{\max}$     | mmol/L/min | cell volume-specific reaction rate of enzyme CS     |
| $K_{ME}^{\max}$     | mmol/L/min | cell volume-specific reaction rate of enzyme ME     |
| $K_{PEPCK}^{\max}$  | mmol/L/min | cell volume-specific reaction rate of enzyme PEPCK  |
| $K_{PC}^{\max}$     | mmol/L/min | cell volume-specific reaction rate of enzyme PC     |
| $K_{AlaTA}^{\max}$  | mmol/L/min | cell volume-specific reaction rate of enzyme AlaTA  |
| $K_{AspTA}^{\max}$  | mmol/L/min | cell volume-specific reaction rate of enzyme AspTA  |

**List of symbols (continued).**

| Symbol              | Unit       | Description                                                            |
|---------------------|------------|------------------------------------------------------------------------|
| $K_{GLDH}^{\max}$   | mmol/L/min | cell volume-specific reaction rate of enzyme GLDH                      |
| $K_{GLNase}^{\max}$ | mmol/L/min | cell volume-specific reaction rate of enzyme GLNase                    |
| $NAD_{basal}$       | -          | adjustable parameter for influence of NAD/NADH                         |
| $r_i$               | mmol/L/min | cell-number-specific activity of enzyme i                              |
| $r_{macro}$         | -          | formula for conversion of macroscopic scale rates to microscopic scale |
| $r_{HK}$            | mmol/L/min | cell volume-specific reaction rate of HK                               |
| $r_{GPI}$           | mmol/L/min | cell volume-specific reaction rate of GPI                              |
| $r_{G6PDH}$         | mmol/L/min | cell volume-specific reaction rate of G6PDH                            |
| $r_{dR5P}$          | mmol/L/min | cell volume-specific reaction rate of R5P degradation                  |
| $r_{dNH4}$          | mmol/L/min | cell volume-specific reaction rate of NH4 degradation                  |
| $r_{UT}$            | mmol/L/min | cell volume-specific reaction rate of UT                               |
| $r_{GLYS}$          | mmol/L/min | cell volume-specific reaction rate of GLYS                             |
| $r_{PFK}$           | mmol/L/min | cell volume-specific reaction rate of PFK                              |
| $r_{TATKF6P}$       | mmol/L/min | cell volume-specific reaction rate of TATKF6P                          |
| $r_{TATK3PG}$       | mmol/L/min | cell volume-specific reaction rate of TATK3PG                          |

**List of symbols (continued).**

| Symbol       | Unit       | Description                                  |
|--------------|------------|----------------------------------------------|
| $r_{ALD}$    | mmol/L/min | cell volume-specific reaction rate of ALD    |
| $r_{ENO}$    | mmol/L/min | cell volume-specific reaction rate of ENO    |
| $r_{PK}$     | mmol/L/min | cell volume-specific reaction rate of PK     |
| $r_{LDH}$    | mmol/L/min | cell volume-specific reaction rate of LDH    |
| $r_{PDH}$    | mmol/L/min | cell volume-specific reaction rate of PDH    |
| $r_{ACO}$    | mmol/L/min | cell volume-specific reaction rate of ACO    |
| $r_{CL}$     | mmol/L/min | cell volume-specific reaction rate of CL     |
| $r_{ICDH}$   | mmol/L/min | cell volume-specific reaction rate of ICDH   |
| $r_{GS}$     | mmol/L/min | cell volume-specific reaction rate of GS     |
| $r_{KDH}$    | mmol/L/min | cell volume-specific reaction rate of KDH    |
| $r_{SDH}$    | mmol/L/min | cell volume-specific reaction rate of SDH    |
| $r_{FMA}$    | mmol/L/min | cell volume-specific reaction rate of FMA    |
| $r_{MDH}$    | mmol/L/min | cell volume-specific reaction rate of MDH    |
| $r_{ATPase}$ | mmol/L/min | cell volume-specific reaction rate of ATPase |
| $r_{AAex}$   | mmol/L/min | cell volume-specific reaction rate of AAex   |

**List of symbols (continued).**

| Symbol               | Unit       | Description                                  |
|----------------------|------------|----------------------------------------------|
| $r_{cUGLC}$          | mmol/L/min | cell volume-specific reaction rate of UGLC   |
| $r_{CS}$             | mmol/L/min | cell volume-specific reaction rate of CS     |
| $r_{ME}$             | mmol/L/min | cell volume-specific reaction rate of ME     |
| $r_{PEPCK}$          | mmol/L/min | cell volume-specific reaction rate of PEPCK  |
| $r_{PC}$             | mmol/L/min | cell volume-specific reaction rate of PC     |
| $r_{AlaTA}$          | mmol/L/min | cell volume-specific reaction rate of AlaTA  |
| $r_{AspTA}$          | mmol/L/min | cell volume-specific reaction rate of AspTA  |
| $r_{GLDH}$           | mmol/L/min | cell volume-specific reaction rate of GLDH   |
| $r_{GLNase}$         | mmol/L/min | cell volume-specific reaction rate of GLNase |
| $r_{Lac_{trans}^x}$  | mmol/L/min | medium volume-specific transport rate of Lac |
| $r_{NH_4^+_{trans}}$ | mmol/L/min | medium volume-specific transport rate of NH4 |
| $r_{Gln_{trans}^x}$  | mmol/L/min | medium volume-specific transport rate of Gln |
| $r_{Glu_{trans}^x}$  | mmol/L/min | medium volume-specific transport rate of Glu |
| $r_{Pyr_{trans}^x}$  | mmol/L/min | medium volume-specific transport rate of Pyr |
| $r_{trans}$          | 1/min      | specific transition rate                     |

**List of symbols (continued).**

| <b>Symbol</b>    | <b>Unit</b>   | <b>Description</b>                                            |
|------------------|---------------|---------------------------------------------------------------|
| $r_{m/Glc^x}$    | mmol/L/min    | medium volume-specific uptake rate of Glc for maintenance     |
| $r_{x/Glc^x}$    | mmol/L/min    | medium volume-specific uptake rate of Glc for growth          |
| $r_{GLUT}$       | mmol/L/min    | cell volume-specific transport rate of Glc                    |
| $r_{xATP}$       | mmol/L/min    | cell volume-specific ATP consumption rate of cell growth      |
| $r_{mATP}$       | mmol/L/min    | cell volume-specific ATP consumption rate of cell maintenance |
| $r_{ATPase}$     | mmol/L/min    | cell volume-specific rate of ATPase                           |
| $r_{dATP}$       | mmol/L/min    | net ATP consumption rate                                      |
| $r_{CCM}$        | mmol/L/min    | net ATP production rate                                       |
| $r_{NADH}$       | mmol/L/min    | net ATP production from NADH                                  |
| $r_{FADH}$       | mmol/L/min    | net ATP production from FADH                                  |
| $r_{TCA}$        | mmol/L/min    | net ATP production from TCA                                   |
| $r_{glycolysis}$ | mmol/L/min    | net ATP production from glycolysis                            |
| $r_{O_2}$        | fmol/cell/min | theoretical O <sub>2</sub> consumption rate                   |
| $V^c$            | μL/mL         | viable cell volume                                            |
| $V_s^c$          | L/cell        | cell-specific volume                                          |



**List of symbols (continued).**

| Symbol        | Unit        | Description                                   |
|---------------|-------------|-----------------------------------------------|
| $V_w$         | -           | working volume                                |
| $X_i$         | cells/mL    | number of viable cells of class i             |
| $X_v$         | cells/mL    | viable cell concentration                     |
| $Y_{x/Glc^x}$ | mmol/L/cell | cell growth-specific yield coefficient of Glc |
| $E_{level}$   | -           | relative enzyme level                         |
| IAV           | -           | influenza A virus                             |
