# Supplementary material for: Impact of Influenza A Virus Infection on Growth and Metabolism of Suspension MDCK Cells Using a Dynamic Model
Source: MDPI journal article supplement (doi:10.3390/metabo12030239), 2022-03-12
Supplement: s1 [file s1]

**Table S4A. Experimental procedures.** Solutions used for washing, quenching and metabolite extraction.

| Name                | Solvent (v/v)                              | Additives (f.c.)                   | Temperature |
|---------------------|--------------------------------------------|------------------------------------|-------------|
| Wash solution       | MilliQ-water (100 %)                       | NaCl (9.0 g/L)                     | 4 °C        |
| Quench solution     | Methanol (66.7 %)<br>Chloroform (33.3 %)   | -                                  | -20 °C      |
| Extraction solution | Methanol (47.4 %)<br>MilliQ-water (52.6 %) | Tricine (2 mM)                     | 4 °C        |
| MeOH-AMBIC          | Methanol (60.0 %)<br>MilliQ-water (40.0 %) | AMBIC (8.5 g/L)<br>HCl (pH adjust) | 4/-40 °C    |
| Chloroform          | Chloroform (100 %)                         | -                                  | -20 °C      |

**Table S4B. Experimental procedures.** KOH-gradient for the separation of intracellular metabolites by AE-HPLC.

| Time [min]     | KOH [mM] | Curve <sup>1</sup> | Time [min] | KOH [mM] | Curve <sup>1</sup> |
|----------------|----------|--------------------|------------|----------|--------------------|
| 0 <sup>2</sup> | 2        | 5                  | 33         | 50       | 5                  |
| 5              | 6        | 5                  | 41         | 86       | 5                  |
| 10             | 10       | 3                  | 41         | 100      | 5                  |
| 15             | 14       | 3                  | 46         | 100      | 5                  |
| 18             | 22       | 1                  | 46         | 2        | 5                  |
| 27             | 30       | 7                  | 53         | 2        | 5                  |

<sup>1</sup> Curves 1 through 4 are convex, curve 5 is linear and curves 6 through 9 are concave; <sup>2</sup> time of injection.

**Table S4C. Experimental procedures.** Dilutions used for the external standards for quantitative LC-MS measurements.

| STD ID           | Tricine-buffer | Metabolite-MM <sup>1</sup> | Water  | e.g. [ATP] <sup>2</sup> |
|------------------|----------------|----------------------------|--------|-------------------------|
| 155              | 845 µL         | 155 µL                     | –      | 310 µM                  |
| 130              | 845 µL         | 130 µL                     | 25 µL  | 260 µM                  |
| 105              | 845 µL         | 105 µL                     | 50 µL  | 210 µM                  |
| 080              | 845 µL         | 80 µL                      | 75 µL  | 160 µM                  |
| 055              | 845 µL         | 55 µL                      | 100 µL | 110 µM                  |
| 030              | 845 µL         | 60 µL (1:2)                | 95 µL  | 60 µM                   |
| 020 <sup>3</sup> | 845 µL         | 40 µL (1:2)                | 115 µL | 40 µM                   |
| 010 <sup>3</sup> | 845 µL         | 100 µL (1:10)              | 55 µL  | 20 µM                   |
| 005              | 845 µL         | 50 µL (1:10)               | 105 µL | 10 µM                   |

<sup>1</sup> Composition of the metabolite master mix can be found in Table 1E in S4 Table; <sup>2</sup> Exemplary concentration of ATP for respective standard; <sup>3</sup> standards not used for method validation.

**Table S4D. Experimental procedures.** Overview of single ion monitoring channels for metabolite quantification by MS.

| Name                                 | Mass  | Span | Time range (min) | Dwell time | Polarity | Cone (V) |
|--------------------------------------|-------|------|------------------|------------|----------|----------|
| <b>Sim 2: Fum</b>                    | 115.0 | 1.0  | 16.0-18.5        | 0.1        | -ve      | 30       |
| <b>Sim 3: Suc</b>                    | 117.0 | 1.0  | 12.0-15.0        | 0.1        | -ve      | 30       |
| <b>Sim 4: Aconitate</b>              | 129.2 | 1.0  | 28.5-33.0        | 0.1        | -ve      | 50       |
| <b>Sim 5 Mal</b>                     | 133.0 | 1.0  | 12.5-15.0        | 0.1        | -ve      | 35       |
| <b>Sim 6: <math>\alpha</math>-KG</b> | 145.1 | 1.0  | 15.0-17.5        | 0.1        | -ve      | 30       |
| <b>Sim 7: PEP</b>                    | 166.8 | 1.0  | 28.0-31.0        | 0.1        | -ve      | 35       |
| <b>Sim 8: 3-PG</b>                   | 185.2 | 1.0  | 24.0-26.5        | 0.1        | -ve      | 45       |
| <b>Sim 9: Cit</b>                    | 191.3 | 1.0  | 25.5-29.0        | 0.1        | -ve      | 35       |
| <b>Sim 10: R5P</b>                   | 229.2 | 1.0  | 18.0-20.5        | 0.1        | -ve      | 45       |
| <b>Sim 15: F16BP</b>                 | 339.1 | 1.0  | 35.0-37.5        | 0.1        | -ve      | 30       |
| <b>Sim 19: UDP-Glc</b>               | 502.0 | 1.0  | 30.0-30.0        | 0.1        | -ve      | 30       |

<sup>1</sup> ...

**Table S4E. Experimental procedures.** Metabolite standard mix used for LC-MS analysis.

| Category       | Substance Name                                    | Supplier      | Product Number | CAS-Number  | Lot Purity [%] | Conc. Master-Mix [µM] | Conc. Std 155 [µM] | Conc. Std 005 [µM] |
|----------------|---------------------------------------------------|---------------|----------------|-------------|----------------|-----------------------|--------------------|--------------------|
| Additives      | Sodium acetate                                    | Sigma-Aldrich | S8750-250G     | 127-09-3    | 99.6           | 100                   | 15.5               | 0.5                |
| Additives      | Sodium chloride                                   | Roth          | P029.3         | 7647-14-5   | 100            | 100                   | 15.5               | 0.5                |
| Additives      | Sodium formate                                    | Sigma-Aldrich | 17841-50G      | 141-53-7    | 100            | 100                   | 15.5               | 0.5                |
| Additives      | Sodium nitrate                                    | Merck         | 1065371000     | 7631-99-4   | 99.5           | 100                   | 15.5               | 0.5                |
| Additives      | Sodium sulfate                                    | Roth          | 8631.2         | 7757-82-6   | 99             | 800                   | 124                | 4                  |
| Nucleo-sugars  | Disodium uridine-diphospho-N-acetyl-galactosamine | Sigma-Aldrich | U5252-5MG      | 108320-87-2 | 100            | 60                    | 9.3                | 0.3                |
| Nucleo-sugars  | Disodium uridine-diphospho-N-acetylglucosamine    | Sigma-Aldrich | U4375-100MG    | 9183-98-1   | 99             | 200                   | 31                 | 1                  |
| Nucleo-sugars  | Disodium uridine-di-phosphoglucose hydrate        | Sigma-Aldrich | U4625-100MG    | 28053-08-9  | 100            | 100                   | 15.5               | 0.5                |
| Nucleotides    | Sodium adenosine-diphosphate                      | Sigma-Aldrich | A2754-100MG    | 20398-34-9  | 99             | 150                   | 23.25              | 0.75               |
| Nucleotides    | Sodium adenosine-monophosphate                    | Sigma-Aldrich | 01930-5G       | 4578-31-8   | 99.7           | 25                    | 3.875              | 0.125              |
| Nucleotides    | Disodium adenosine-triphosphate hydrate           | Sigma-Aldrich | A2383-1G       | 34369-07-8  | 99             | 2000                  | 310                | 10                 |
| Nucleotides    | Sodium cytidine-diphosphate                       | Sigma-Aldrich | C9755-25MG     | 34393-59-4  | 95             | 12.5                  | 1.9375             | 0.0625             |
| Nucleotides    | Disodium cytidine-monophosphate                   | Sigma-Aldrich | C006-500MG     | 6757-06-8   | 100            | 10                    | 1.55               | 0.05               |
| Nucleotides    | Disodium cytidine-triphosphate                    | Sigma-Aldrich | C506-100MG     | 36051-68-0  | 95.3           | 100                   | 15.5               | 0.5                |
| Nucleotides    | Sodium guanosine-diphosphate                      | Sigma-Aldrich | G7127-100MG    | 43339-22-6  | 98             | 40                    | 6.2                | 0.2                |
| Nucleotides    | Disodium guanosine-monophosphate hydrate          | Sigma-Aldrich | G877-500MG     | 5550-12-9   | 99.9           | 12.5                  | 1.9375             | 0.0625             |
| Nucleotides    | Sodium guanosine-triphosphate hydrate             | Sigma-Aldrich | G887-25MG      | 36051-31-7  | 96             | 240                   | 37.2               | 1.2                |
| Nucleotides    | Disodium uridine-diphosphate hydrate              | Sigma-Aldrich | 94330-100MG    | 27821-45-0  | 98.8           | 25                    | 3.875              | 0.125              |
| Nucleotides    | Disodium uridine-monophosphate                    | Sigma-Aldrich | U6375-1G       | 3387-36-8   | 100            | 40                    | 6.2                | 0.2                |
| Nucleotides    | Trisodium uridine-triphosphate hydrate            | Sigma-Aldrich | U6625-100MG    | 19817-92-6  | 96             | 500                   | 77.5               | 2.5                |
| Organic acids  | D-(-)-3-Phosphoglyceric acid disodium salt        | Sigma-Aldrich | P8877-10MG     | 80731-10-8  | 93             | 50                    | 7.75               | 0.25               |
| Organic acids  | cis-Aconitic acid                                 | Sigma-Aldrich | A3412-1G       | 585-84-2    | 99             | 25                    | 3.875              | 0.125              |
| Organic acids  | Citric acid monohydrate                           | Sigma-Aldrich | C1909-25G      | 5949-29-1   | 100            | 200                   | 31                 | 1                  |
| Organic acids  | Fumaric acid                                      | Sigma-Aldrich | F19353-25G     | 110-17-8    | 99.7           | 25                    | 3.875              | 0.125              |
| Organic acids  | Trisodium isocitric acid hydrate                  | Sigma-Aldrich | I252-1G        | 1637-73-6   | 99             | 20                    | 3.1                | 0.1                |
| Organic acids  | Sodium L-lactate                                  | Sigma-Aldrich | L7022-5G       | 867-56-1    | 99.8           | 160                   | 24.8               | 0.8                |
| Organic acids  | DL-Malic acid                                     | Sigma-Aldrich | M0875-100G     | 6915-15-7   | 99             | 250                   | 38.75              | 1.25               |
| Organic acids  | Potassium phosphoenolpyruvate                     | Applchem      | A2271.0250     | 4265-07-0   | 98             | 25                    | 3.875              | 0.125              |
| Organic acids  | Sodium pyruvate                                   | Sigma-Aldrich | P8574-100G     | 113-24-6    | 100            | 200                   | 31                 | 1                  |
| Organic acids  | Disodium succinate                                | Sigma-Aldrich | 224731-5G      | 150-90-3    | 99.9           | 100                   | 15.5               | 0.5                |
| Organic acids  | α-Ketoglutaric acid                               | Sigma-Aldrich | K1750-100G     | 328-50-7    | 100            | 100                   | 15.5               | 0.5                |
| Phospho-sugars | Trisodium D-fructose-1,6-bisphosphate hydrate     | Sigma-Aldrich | F6803-10MG     | 38099-82-0  | 100            | 150                   | 23.25              | 0.75               |
| Phospho-sugars | Fructose-1 Phosphate Sodium salt                  | Sigma-Aldrich | sc-214802      | 53823-70-4  | 97             | 35                    | 5.425              | 0.175              |
| Phospho-sugars | Disodium fructose-6-phosphate hydrate             | Sigma-Aldrich | F627-100MG     | 26177-86-6  | 100            | 25                    | 3.875              | 0.125              |
| Phospho-sugars | Disodium α-D-glucose-1-phosphate hydrate          | Sigma-Aldrich | G7000-1G       | 56401-20-8  | 100            | 35                    | 5.425              | 0.175              |
| Phospho-sugars | Sodium α-D-glucose-6-phosphate                    | Sigma-Aldrich | G7879-500MG    | 54010-71-8  | 100            | 35                    | 5.425              | 0.175              |
| Phospho-sugars | Disodium ribose-5-Phosphate dihydrate             | Sigma-Aldrich | 84875-250MG    | 207671-46-3 | 100            | 25                    | 3.875              | 0.125              |
