# Supplementary material for: Impact of Influenza A Virus Infection on Growth and Metabolism of Suspension MDCK Cells Using a Dynamic Model
Source: Metabolites. 2022 Mar 12;12(3):239. doi: 10.3390/metabo12030239 (PMC8950586; doi:10.3390/metabo12030239)
Supplement: Supplementary file 1 [file metabolites-12-00239-s001.zip › Supplementary File S4.xlsx]

## Sheet: data
	Time	Xv	Error	Vc	Error	d	Error	Virus titer	Error	Glcx	Error	Lacx	Error	Glux	Error	Pyrx	Error	Glnx	Error	NH4x	Error	ATP	Error	Cit	Error	cAc	Error	Isocit	Error	Keto	Error	SUC	Error	Fum	Error	Mal	Error	G6P	Error	F6P	Error	F16P	Error	G3P	Error	PEP	Error	R5P	Error
Cult 1	h	10e6 cell/ mL	10e6 cell/ mL	µL/mL	µL/mL	µm	µm	log(virions)/mL	log(virions)/mL	mmol/L	mmol/L	mmol/L	mmol/L	mmol/L	mmol/L	mmol/L	mmol/L	mmol/L	mmol/L	mmol/L	mmol/L	mmol/L	mmol/L	mmol/L	mmol/L	mmol/L	mmol/L	mmol/L	mmol/L	mmol/L	mmol/L	mmol/L	mmol/L	mmol/L	mmol/L	mmol/L	mmol/L	mmol/L	mmol/L	mmol/L	mmol/L	mmol/L	mmol/L	mmol/L	mmol/L	mmol/L	mmol/L	mmol/L	mmol/L
PN01	0	0.79	0.0306		0	13.9	0.0839			19.3	0	0	0	1.54	0	7.15	0	4.44	0	0.266	0		0		0		0		0		0		0		0		0		0		0		0		0		0		0
PN02	5.42	0.95	0.0404		0	14.1	0.0252			19.4	0	0	0	1.53	0	6.51	0	4.43	0	0.393	0	2.28	0.117	1.37	0.254	0.00232	0.000148	0.015	0.0104	0.349	0.0842	0.0344	0.0495	0.123	0.0127	0.766	0.113	0.135	0.00383	0.0456	0.00169	0.053	0.00472	0.326	0.028	0.00399	3.45e-05	0.0139	0.00113
PN03	11.2	1.08	0.0493		0	14.1	0.172			19.3	0	0	0	1.68	0	7.11	0	4.23	0	0.57	0	2.4	0.102	1.12	0.108	0.00932	0.00605	0.0235	0.0106	0.276	0.0627	-0.00461	0.00237	0.0991	0.0192	0.632	0.1	0.137	0.0289	0.0463	0.0102	0.0371	0.00544	0.244	0.0225	0.0199	0.0121	0.0103	0.00145
PN04	23.6	1.37	0.0755		0	13.9	0.0529			18.3	0	0	0	1.73	0	6.52	0	3.78	0	0.894	0	2.42	0.0505	0.88	0.137	0.0125	0.00287	0.0292	0.00677	0.274	0.0346	0.00649	0.00228	0.146	0.0285	0.764	0.155	0.178	0.0236	0.0525	0.00688	0.0536	0.0232	0.303	0.0891	0.0392	0.0132	0.0171	0.00499
PN05	35.7	1.7	0.0404		0	14	0.0814			17.6	0	0	0	1.9	0	6.33	0	3.5	0	1.11	0	2.37	0.0629	1.02	0.0708	0.0158	0.0014	0.0317	0.00414	0.353	0.0348	0.0534	0.00397	0.146	0.0103	0.797	0.0542	0.203	0.00662	0.068	0.00229	0.0372	0.0116	0.268	0.0408	0.0308	0.00538	0.0184	0.0027
PN06	47.7	2.09	0.298		0	14	0.133			16.8	0	5.12	0	2.06	0	5.94	0	3.08	0	1.29	0	2.49	0.0724	0.96	0.123	0.0146	0.00111	0.0294	0.00287	0.255	0.0521	0.0154	0.00995	0.132	0.00602	0.658	0.0401	0.167	0.0195	0.0492	0.00863	0.0557	0.0176	0.276	0.0338	0.0311	0.004	0.0168	0.00166
PN07	54.1	2.69	0.0611		0	13.9	0.139			16.8	0	6.46	0	2.09	0	5.14	0	2.96	0	1.32	0	2.27	0.0842	0.633	0.177	0.0105	0.00192	0.0202	0.0052	0.172	0.0437	0.00107	0.00777	0.079	0.0166	0.356	0.0865	0.1	0.0335	0.0263	0.0118	0.0397	0.0164	0.17	0.0539	0.0182	0.00639	0.0143	0.00601
PN08	59.9	2.95	0.127		0	13.7	0.0603			16.3	0	7.93	0	2.32	0	4.78	0	2.56	0	1.33	0	2.39	0.041	0.906	0.0727	0.015	0.00141	0.0329	0.00385	0.191	0.0248	0.00211	0.00381	0.107	0.0114	0.555	0.0665	0.121	0.0113	0.0342	0.0044	0.0605	0.00968	0.248	0.019	0.0231	0.00207	0.0157	0.00141
PN09	72.1	3.76	0.122		0	13.5	0.126			14.9	0	11.1	0	2.26	0	3.76	0	2.31	0	1.32	0	2.55	0.00873	0.619	0.0792	0.0105	0.00101	0.0236	0.00226	0.163	0.0401	0.0182	0.0183	0.0816	0.0137	0.413	0.0736	0.117	0.0189	0.03	0.00473	0.033	0.0114	0.158	0.0307	0.0132	0.00369	0.0147	0.00169
PN10	83.8	4.73	0.0473		0	13.6	0.0608			13.2	0	13.1	0	2.76	0	2.08	0	1.31	0	1.32	0	2.37	0.0695	0.501	0.00365	0.00998	0.000849	0.023	0.000756	0.137	0.0171	0.0112	0.00379	0.0642	0.00561	0.331	0.0185	0.0919	0.0102	0.0261	0.00358	0.0329	0.00832	0.121	0.00895	0.00799	0.000701	0.0135	0.000731
PN11	95.9	5.58	0.242		0	13.3	0.0306			11.9	0	15.5	0	3.16	0	0.842	0	0.28	0	1.41	0	2.7	0.0806	0.61	0.116	0.0123	0.00254	0.0263	0.00342	0.169	0.0489	0.0371	0.0128	0.0809	0.0148	0.438	0.0998	0.101	0.0224	0.0331	0.0154	0.0444	0.0221	0.125	0.0222	0.00787	0.00181	0.018	0.00363
PN12	108	7.17	0.121		0	13	0.0115			7.18	0	17	0	2.95	0	0.722	0	0.43	0	1.51	0	2.78	0.107	0.437	0.0322	0.00971	0.000254	0.0217	0.00149	0.118	0.0114	0.0226	0.00353	0.0599	0.00132	0.299	0.0145	0.092	0.0101	0.0296	0.0069	0.0371	0.0168	0.101	0.0137	0.00583	0.000582	0.017	0.000887
PN13	122	8.06	0.1		0	12.6	0.0513			4.21	0	17.1	0	3.22	0	0.588	0	0.48	0	1.54	0	2.22	0.0803	0.392	0.0177	0.00895	0.000434	0.0186	0.000573	0.114	0.00891	0.0301	0.00665	0.0563	0.00191	0.235	0.00403	0.0769	0.0094	0.0246	0.00598	0.0155	0.00376	0.0618	0.00528	0.0043	0.000252	0.0107	0.000772
PN14	133	8.95	0.497		0	12.5	0.0379			2.54	0	16.3	0	3.6	0	0.408	0	0.03	0	1.75	0	1.9	0.0587	0.366	0.0328	0.00737	0.000547	0.0169	0.0013	0.0859	0.0128	0.0269	0.00505	0.0488	0.00506	0.218	0.021	0.0521	0.0129	0.0133	0.00365	0.0239	0.00278	0.0616	0.0115	0.00378	0.000837	0.00819	0.00355
PN15	146	8.71	0.11		0	12.1	0.0153			0.667	0	16.7	0	3.71	0	0.216	0	0.38	0	1.87	0	2.06	0.0554	0.216	0.0161	0.00388	0.000499	0.00864	0.000665	0.0563	0.00333	0.113	0.009	0.0416	0.00216	0.158	0.0108	0.0162	0.00224	0.00488	0.000502	0.0107	0.00109	0.0304	0.00305	0.00178	0.000394	0.00232	0.00023
PN16	171	6.87	0.0529		0	11.2	0.0404			0	0	15.6	0	4	0	0.671	0	0.26	0	2.3	0	1.2	0.0318	0.228	0.0406	0.00336	0.000627	0.00527	0.000962	0.0463	0.0105	0.161	0.0231	0.0605	0.0115	0.24	0.0389	0.0105	0.00185	0.00498	0.000516	0.0128	7.93e-06	0.0269	0.00307	0.00247	0.000381	0.00126	0.000335
	Time	Xv	Error	Vc	Error	d	Error	Virus titer	Error	Glcx	Error	Lacx	Error	Glux	Error	Pyrx	Error	Glnx	Error	NH4x	Error	ATP	Error	Cit	Error	cAc	Error	Isocit	Error	Keto	Error	SUC	Error	Fum	Error	Mal	Error	G6P	Error	F6P	Error	F16P	Error	G3P	Error	PEP	Error	R5P	Error
Cult 2	h	10e6 cell/ mL	10e6 cell/ mL	µL/mL	µL/mL	µm	µm	log(virions)/mL	log(virions)/mL	mmol/L	mmol/L	mmol/L	mmol/L	mmol/L	mmol/L	mmol/L	mmol/L	mmol/L	mmol/L	mmol/L	mmol/L	mmol/L	mmol/L	mmol/L	mmol/L	mmol/L	mmol/L	mmol/L	mmol/L	mmol/L	mmol/L	mmol/L	mmol/L	mmol/L	mmol/L	mmol/L	mmol/L	mmol/L	mmol/L	mmol/L	mmol/L	mmol/L	mmol/L	mmol/L	mmol/L	mmol/L	mmol/L	mmol/L	mmol/L
PN01	0	0.79	0.0306		0	13.9	0			19.3	0	0	0	1.54	0	7.11	0	4.44	0	0.266	0		0		0		0		0		0		0		0		0		0		0		0		0		0		0
PN02	5.42	0.903	0.0404		0	13.7	0			19.3	0	0	0	1.61	0	7.08	0	4.28	0	0.403	0	2.33	0.0702	1.24	0.248	0.0122	0.00365	0.0271	0.00813	0.327	0.0825	-0.0188	0.00865	0.146	0.0237	0.795	0.149	0.164	0.0414	0.0522	0.00654	0.0555	0.0139	0.333	0.0769	0.0349	0.00621	0.0176	0.00522
PN03	11.2	1.02	0.0173		0	13.8	0			18.4	0	0	0	1.54	0	7.42	0	3.93	0	0.56	0	2.78	0.115	1.1	0.055	0.0112	0.00035	0.0254	0.00327	0.293	0.037	-0.0125	0.0121	0.129	0.0219	0.718	0.0783	0.143	0.00332	0.0381	0.00298	0.0437	0.00854	0.348	0.045	0.0385	0.0054	0.0226	0.0026
PN04	23.6	1.31	0.0624		0	13.8	0			18.4	0	0	0	1.65	0	7.34	0	3.84	0	0.874	0	2.63	0.057	1.04	0.0349	0.0149	0.000971	0.0349	0.00567	0.302	0.0376	0.0154	0.0164	0.171	0.0145	0.893	0.0484	0.197	0.0264	0.0561	0.00832	0.0612	0.0208	0.357	0.0563	0.0423	0.00806	0.02	0.0019
PN05	35.7	1.71	0.0473		0	13.8	0			17.9	0	0	0	1.82	0	6.21	0	3.56	0	1.13	0	2.37	0.0958	0.9	0.146	0.00933	0.0052	0.0279	0.00336	0.314	0.0653	0.0359	0.0236	0.12	0.0154	0.668	0.0954	0.172	0.0159	0.0612	0.00808	0.0606	0.0075	0.331	0.0378	0.0319	0.0105	0.0157	0.00351
PN06	47.7	2.16	0.0611		0	13.8	0			16.9	0	5.31	0	2.11	0	6.05	0	3.16	0	1.3	0	2.77	0.162	1.01	0.0827	0.0157	0.00179	0.0314	0.00347	0.26	0.0357	0.0111	0.017	0.147	0.00646	0.708	0.0541	0.182	0.0177	0.052	0.00737	0.0672	0.0199	0.315	0.0397	0.036	0.00531	0.0181	0.00246
PN07	49.9	2.33	0.0889		0	14	0	8.22789	0.658231	16.6	0	6.97	0	2.05	0	5.76	0	3.04	0	1.32	0	2.59	0.0374	0.901	0.104	0.0145	0.000669	0.0284	0.00196	0.281	0.0419	0.0166	0.0111	0.123	0.0157	0.642	0.0882	0.156	0.0109	0.0493	0.00627	0.0537	0.0171	0.25	0.0425	0.0295	0.00501	0.0172	0.00268
PN08	51.9	2.54	0.115		0	13.9	0	8.20952	0.656761	16.4	0	6.54	0	2.06	0	5.74	0	2.95	0	1.31	0	2.32	0.0601	1.07	0.103	0.0173	0.00282	0.0374	0.00703	0.231	0.0164	0.0135	0.014	0.146	0.0108	0.748	0.064	0.12	0.0133	0.0304	0.00297	0.175	0.0338	0.378	0.0315	0.0449	0.00571	0.023	0.00491
PN09	54.1	2.51	0.0764		0	13.7	0	9.16435	0.733148	16.1	0	7.43	0	2.13	0	5.32	0	2.92	0	1.36	0	2.44	0.116	0.935	0.188	0.0148	0.00143	0.0281	0.0052	0.28	0.0597	0.00918	0.0068	0.117	0.0121	0.544	0.0439	0.101	0.0102	0.0244	0.00288	0.0555	0.0198	0.224	0.0427	0.0203	0.00409	0.0139	0.000985
PN10	57	2.3	0.0231		0	14	0	9.81358	0.785086	16	0	8.31	0	2	0	5.36	0	3.04	0	1.18	0	2.48	0.0409	1	0.0897	0.0169	0.00135	0.0338	0.00315	0.382	0.0371	0.0295	0.00878	0.144	0.00762	0.681	0.0228	0.0951	0.0268	0.025	0.00205	0.025	0.00439	0.182	0.0318	0.0194	0.00413	0.0132	0.00147
PN11	59.9	2.28	0.0208		0	13.3	0	9.96142	0.796914	15.5	0	8.91	0	2.23	0	5.18	0	2.75	0	1.31	0	2.42	0.0284	1.03	0.0249	0.0172	0.000997	0.035	0.00101	0.292	0.0315	0.0138	0.00776	0.111	0.0103	0.56	0.0482	0.112	0.0179	0.0212	0.00597	0.0219	0.00232	0.182	0.00445	0.0171	0.000676	0.00943	0.00155
PN12	66.1	2.06	0.0896		0	12.5	0	10.1584	0.812669	15.1	0	9.82	0	2.37	0	4.72	0	2.5	0	1.38	0	2.33	0.0754	0.955	0.137	0.0139	0.00123	0.0282	0.00331	0.281	0.0589	0.0234	0.0113	0.0805	0.0136	0.416	0.067	0.0919	0.00779	0.0264	0.00347	0.0119	0.00226	0.0841	0.0153	0.00866	0.00237	0.00573	0.0016
PN13	72.1	1.86	0.0404		0	11.6	0	10.2405	0.819244	14.9	0	10.6	0	2.9	0	4.35	0	1.72	0	1.76	0	2.04	0.0872	0.652	0.121	0.00999	0.00239	0.021	0.00399	0.163	0.0401	0.00354	0.0118	0.0672	0.0142	0.32	0.0579	0.0777	0.0196	0.028	0.00393	0.00924	0.0012	0.0441	0.00752	0.00471	0.000484	0.00331	0.00253
PN14	83.8	1.11	0.0208		0	11	0	10.3979	0.831835	14.7	0	11.3	0	3.23	0	3.96	0	1.2	0	1.96	0	0.756	0.0145	1.16	0.0448	0.018	0.00135	0.0343	0.00291	0.243	0.0154	-0.00137	0.0109	0.114	0.00442	0.613	0.0216	0.0879	0.00315	0.027	0.000962	0.00206	0.00109	0.0274	0.00507	0.00307	0.00034	0.0024	0.00339
PN15	107	0.78	0.0208		0	10.5	0	10.4183	0.833464	14.4	0	11.6	0	3.19	0	4.37	0	1.29	0	2.12	0		0		0		0		0		0		0		0		0		0		0		0		0		0		0
João R. C. Ramos, Thomas Bissinger, Yvonne Genzel, Udo Reichl, Impact of influenza A virus infection on growth and metabolism of suspension MDCK cells using a dynamic model
[truncated: 2 more columns]
