# Supplementary material for: Impact of Influenza A Virus Infection on Growth and Metabolism of Suspension MDCK Cells Using a Dynamic Model
Source: Metabolites. 2022 Mar 12;12(3):239. doi: 10.3390/metabo12030239 (PMC8950586; doi:10.3390/metabo12030239)
Supplement: Supplementary file 1 [file metabolites-12-00239-s001.zip › Supplementary File S5.xlsx]

## Sheet: Parameter Boundaries Strutured
Name	Mathtype	Value	Q95%	Name	Mathtype	Value	Q95%	Name	Mathtype	Value	Q95%	Name	Mathtype	Value	Q95%	Name	Mathtype	Value	Q95%	Name	Mathtype	Value	Q95%	Name	Mathtype	Value	Q95%	Name	Mathtype	Value	Q95%	Name	Mathtype	Value	Q95%	Name	Mathtype	Value	Q95%	Name	Mathtype	Value	Q95%	Name	Mathtype	Value	Q95%	Name	Mathtype
Vmax_HK		6.25e-13	6.15e-13-1.21e-12	Vmax_PK		1.44e-12	1.25e-12-1.48e-12	Vmax_MDH		1.97e-13	2.87e-14-3.93e-13	Vmax_GLDH		9.44e-09	5.96e-09-2.01e-08	km_GPI		7.97e-02	1.37e-02-3.25e-01	k_PyrPK		3.21e+03	8.00e+02-8.29e+03	k_xATP		3.00e+02	2.00e+02-4.79e+02	km_OAA		2.31e-04	1.92e-05-6.18e-04	k_KetoAspTA		1.93e+00	4.91e-01-4.57e+05	km_TATKF6P		4.41e-07	1.10e-07-1.60e-06	k_Glnx		1.05e+01	4.63e+00-4.86e+01	k_Lactrans		2.73e+00	1.46e+00-7.52e+00	ka_ATPdNH4
Vmax_GPI		1.29e-12	8.43e-13-4.99e-12	Vmax_LDH		3.79e-09	1.73e-09-1.20e-08	v_dR5P		2.90e-12	1.28e-12-4.85e-12	Vmax_GLNase		1.23e-11	4.99e-12-7.20e-11	keq_GPI		1.55e+00	5.63e-01-6.12e+02	km_PyrPDH		4.97e-07	1.56e-07-1.31e-06	k_mATP		1.33e+07	1.00e+07-8.81e+07	km_AcCoA		1.10e+05	4.29e+04-3.05e+05	ki_GluGLDH		6.27e-05	2.57e-05-9.71e-05	km_GLDH		3.32e+04	1.44e+04-6.37e+04	km_Pyrxtrans		2.55e-04	3.24e-05-1.07e-03	k_Lacxtrans		7.97e+01	2.68e+01-1.42e+02	k_NH4x
Vmax_G6PDH		1.06e-14	1.03e-14-3.50e-14	Vmax_PDH		5.82e-13	1.30e-13-1.14e-12	v_ATPase		4.52e-11	3.18e-11-7.64e-11	Vmax_AlaTA		4.69e-12	2.26e-12-1.12e-11	km_G6PDH		3.39e-03	9.91e-04-9.19e-03	keq_ACO		1.46e-02	1.28e-02-1.61e-02	NADbasal		2.33e+00	1.26e+00-3.55e+00	km_SDH		4.07e+00	2.78e-03-6.39e+00	km_GLNase		1.69e-04	2.99e-05-2.59e-02	km_ATPHK		2.36e-06	7.20e-07-7.32e-06	alphaAA		8.57e-06	2.66e-06-2.20e-05	k_PyrLDH		6.37e-02	3.21e-02-1.24e-01	keq_NH4xtrans
Vmax_UT		9.86e-16	6.16e-16-1.70e-15	v_ACO		3.10e-08	1.02e-08-4.99e-08	v_AAex		4.34e-13	3.28e-13-5.80e-13	v_dNH4		8.58e-11	4.17e-11-2.24e-10	km_UT		7.23e-02	1.33e-02-1.82e-01	keq_ACO2		2.14e+00	1.90e+00-2.38e+00	km_cUGLC		4.07e+00	1.97e+00-6.39e+00	km_dR5P		5.25e-01	1.96e-01-9.22e-01	keq_GLDH		4.51e-01	1.25e-01-1.71e+00	k_ATPALD		7.40e+04	1.93e+04-2.31e+05	km_AspTA		4.25e+03	2.81e+02-1.14e+04	k_LacLDH		4.39e-02	2.71e-02-1.01e-01	k_NH4
v_GLYS		2.44e-17	6.32e-18-8.96e-17	Vmax_CL		1.79e-16	2.43e-17-9.12e-16	v_cUGLC		1.19e-14	7.01e-15-2.29e-14	v_Lacxtrans		1.92e+03	4.05e+02-7.66e+03	keq_TATKF6P		7.01e-01	2.03e-01-1.73e+00	km_Cit		7.83e+01	1.32e+01-2.75e+02	km_ME		2.27e-01	1.53e-01-4.49e-01	km_PEPCK		3.93e-09	8.42e-10-1.26e-08	keq_ALD		8.95e+03	2.59e+03-4.02e+04	k_3GPALD		1.47e-04	4.57e-05-2.99e-04	km_ATPGS		1.88e+01	1.05e+01-1.17e+02	k_cPyr		9.10e-06	1.48e-06-5.27e-05	km_AlaTA
Vmax_PFK		7.88e-13	6.67e-13-9.96e-13	Vmax_ICDH		6.47e-15	2.66e-15-1.39e-14	Vmax_CS		4.32e-10	2.05e-10-9.39e-10	v_Glnxtrans		2.35e-04	1.95e-04-2.72e-04	keq_TATKG3P		6.63e-06	1.09e-06-4.82e-05	keq_ICDH		2.33e+01	1.21e+01-3.30e+01	ki_ATPME		6.89e+04	1.90e+04-1.99e+05	km_PyrPC		7.62e-02	9.36e-03-1.24e-01	ka_PFK		3.39e+00	2.88e+00-4.28e+00	km_ATPPC		4.06e-09	4.39e-10-1.16e-08	ki_ATPGLNase		2.81e-02	1.16e-02-7.50e-02	ka_PyrLDH		3.07e-05	1.07e-05-9.84e-05	ki_GluAlaTA
v_TATKF6P		3.45e-14	1.56e-14-6.17e-14	Vmax_GS		7.61e-13	1.05e-14-1.44e-12	Vmax_ME		7.05e-13	5.53e-13-9.30e-13	v_Pyrxtrans		4.31e-04	3.90e-04-5.12e-04	km_PFK		5.67e-03	3.12e-03-1.13e-02	keq_AAex		6.72e+05	1.64e+05-9.00e+05	ka_Bio		1.31e+03	3.87e+02-2.75e+03	keq_ME		1.84e+04	4.28e+02-6.93e+04	km_ATPase		1.37e+01	8.79e+00-2.24e+01	km_ATPPDH		3.94e+02	2.16e+02-7.31e+02	ki_OAASDH		1.56e-01	6.11e-02-2.85e-01	k_GluLDH		2.08e+01	8.97e+00-6.08e+01
v_TATK3PG		7.50e-14	3.72e-14-1.18e-13	v_KDH		7.90e-13	6.62e-13-9.68e-13	Vmax_PEPCK		2.84e-13	1.12e-13-3.36e-13	v_NH4xtrans		4.25e-04	1.09e-04-2.99e-03	k_F16P		1.55e-02	4.99e-03-3.12e-02	keq_FMA		7.71e+00	5.63e+00-3.66e+03	km_GluGS		2.33e-03	8.16e-04-2.51e-02	km_KDH		1.14e-01	7.42e-02-2.06e-01	k_3PG		1.35e+00	6.39e-01-2.94e+00	k_Glux		2.47e+01	1.46e+01-4.57e+01	km_GLYS		8.96e+05	1.95e+05-9.00e+05	ki_GluLDH		1.73e+01	6.41e+00-9.50e+01
Vmax_ALD		3.34e-10	1.77e-10-8.27e-10	v_SDH		1.48e-10	8.11e-11-3.35e-10	Vmax_PC		1.55e-12	5.36e-13-2.40e-12	v_Gluxtrans		4.70e-05	2.15e-05-1.01e-04	keq_ENO		4.17e+02	1.20e+02-3.66e+03	km_FMA		5.54e+03	1.49e+03-1.72e+04	km_ICDH		1.52e-07	5.07e-08-5.63e-07	k_OAAAspTA		1.15e+03	2.89e+02-3.05e+03	k_PEPENO		1.01e-02	3.53e-03-1.90e-02	k_Glu		2.00e+03	4.71e+02-1.03e+04	km_ATPCL		3.08e+04	3.47e+03-9.44e+04	keq_LDH		1.01e+01	5.26e+00-1.84e+01
v_ENO		2.17e-11	1.17e-11-4.00e-11	Vmax_FMA		8.45e-08	3.07e-08-1.00e-07	Vmax_AspTA		9.54e-09	3.44e-09-3.11e-08	km_HK		5.01e-04	2.00e-04-3.26e-03	k_PEPPK		1.64e-03	8.58e-04-2.36e-03	km_MDH		3.25e+00	6.91e-01-7.79e+00					k_GluAspTA		2.70e-03	7.99e-04-8.22e-03	km_TATK3PG		6.59e-09	5.14e-10-2.77e-08	keq_Gluxtrans		3.56e-05	4.05e-06-9.25e-05	keq_Lacxtrans		3.73e+01	1.88e+01-5.88e+01	km_dNH4		8.12e+02	2.48e+02-1.65e+03
João R. C. Ramos, Thomas Bissinger, Yvonne Genzel, Udo Reichl, Impact of influenza A virus infection on growth and metabolism of suspension MDCK cells using a dynamic model
[truncated: 2 more columns]

## Sheet: Bootstrap results Structured
Vmax_HK	Vmax_GPI	Vmax_G6PDH	Vmax_UT	v_GLYS	Vmax_PFK	v_TATKF6P	v_TATK3PG	Vmax_ALD	v_ENO	Vmax_PK	Vmax_LDH	Vmax_PDH	v_ACO	Vmax_CL	Vmax_ICDH	Vmax_GS	v_KDH	v_SDH	Vmax_FMA	Vmax_MDH	v_dR5P	v_ATPase	v_AAex	v_cUGLC	Vmax_CS	Vmax_ME	Vmax_PEPCK	Vmax_PC	Vmax_AspTA	Vmax_GLDH	Vmax_GLNase	Vmax_AlaTA	v_dNH4	v_Lacxtrans	v_Glnxtrans	v_Pyrxtrans	v_NH4xtrans	v_Gluxtrans	km_HK	km_GPI	keq_GPI	km_G6PDH	km_UT	keq_TATKF6P	keq_TATKG3P	km_PFK	k_F16P	keq_ENO	k_PEPPK
6.2535e-13	1.28639e-12	1.06185e-14	9.85747e-16	2.44309e-17	7.87833e-13	3.44882e-14	7.49541e-14	3.34341e-10	2.16732e-11	1.44216e-12	3.78577e-09	5.81578e-13	3.09551e-08	1.79304e-16	6.47012e-15	7.61377e-13	7.895e-13	1.48453e-10	8.45337e-08	1.96964e-13	2.90261e-12	4.52437e-11	4.33996e-13	1.19224e-14	4.32142e-10	7.05027e-13	2.84007e-13	1.55089e-12	9.53713e-09	9.44486e-09	1.23099e-11	4.68921e-12	8.5849e-11	1921.67	0.000235446	0.000430788	0.000424853	4.69669e-05	0.000500702	0.0797104	1.55461	0.00338993	0.0723357	0.700818	6.63363e-06	0.00566852	0.015532	416.501	0.00164182
6.25779e-13	1.58953e-12	1.2046e-14	9.19071e-16	2.33956e-17	7.41317e-13	3.7606e-14	7.07934e-14	5.05302e-10	2.08362e-11	1.43658e-12	4.60419e-09	7.53673e-13	2.57825e-08	1.40095e-16	7.08632e-15	8.6482e-13	7.28608e-13	1.3381e-10	7.36807e-08	1.87123e-13	3.01512e-12	5.28729e-11	4.01793e-13	1.16736e-14	3.99912e-10	7.10761e-13	3.03903e-13	1.33026e-12	9.33159e-09	1.05614e-08	1.20456e-11	4.48826e-12	7.8329e-11	1976.44	0.000223709	0.000440871	0.000329296	4.80969e-05	0.000504162	0.100331	1.25347	0.00402188	0.0658447	0.504971	6.15486e-06	0.00534112	0.0172482	389.533	0.00117192
6.25784e-13	1.37813e-12	1.40582e-14	9.52203e-16	2.52294e-17	7.8008e-13	4.27741e-14	5.32482e-14	4.5616e-10	1.67525e-11	1.43848e-12	3.27827e-09	5.67458e-13	2.73631e-08	1.97244e-16	5.20699e-15	8.08036e-13	7.76834e-13	1.23767e-10	7.87901e-08	2.23612e-13	3.03742e-12	4.36709e-11	3.80924e-13	1.12152e-14	4.4641e-10	6.90677e-13	2.97294e-13	1.48153e-12	7.15134e-09	1.02832e-08	1.43002e-11	4.62353e-12	8.39725e-11	1743.53	0.000263682	0.000460387	0.000382467	3.89859e-05	0.000429999	0.0655172	1.24134	0.00250347	0.0685051	0.494763	6.20596e-06	0.00519869	0.0126542	388.733	0.00105335
6.25662e-13	1.2979e-12	1.28718e-14	7.75999e-16	2.29761e-17	8.27409e-13	3.76144e-14	8.10347e-14	3.52996e-10	2.17963e-11	1.39429e-12	3.69067e-09	5.41936e-13	2.59711e-08	1.42129e-16	6.80678e-15	8.33421e-13	8.93341e-13	1.58663e-10	9.72683e-08	1.98609e-13	2.97559e-12	5.16801e-11	4.12721e-13	1.07066e-14	3.97701e-10	7.66041e-13	2.79164e-13	1.62098e-12	1.14006e-08	9.24008e-09	9.66638e-12	4.9157e-12	1.12318e-10	2162.92	0.000248766	0.000440501	0.000266725	4.70074e-05	0.000655842	0.0663574	1.41688	0.00309104	0.0579353	0.576107	8.82343e-06	0.0056901	0.0132159	520.696	0.00109875
6.21278e-13	1.33272e-12	1.19572e-14	9.72634e-16	1.83768e-17	7.73521e-13	3.31946e-14	6.71072e-14	3.67053e-10	2.35194e-11	1.37092e-12	3.18112e-09	6.22843e-13	3.05629e-08	1.59298e-16	5.66933e-15	8.39059e-13	8.97e-13	1.50657e-10	7.27315e-08	2.02375e-13	2.8888e-12	5.14981e-11	4.26753e-13	1.62165e-14	5.17045e-10	7.31558e-13	2.2691e-13	1.62239e-12	9.99292e-09	1.06892e-08	1.20314e-11	4.54508e-12	9.43008e-11	1717.66	0.000257185	0.000461502	0.00037219	3.99373e-05	0.000519002	0.0840764	1.74874	0.00322767	0.076762	0.731434	4.94347e-06	0.0060409	0.0151182	326.955	0.00107249
6.25701e-13	1.36163e-12	1.1638e-14	7.39071e-16	2.58994e-17	8.10663e-13	4.18207e-14	7.95247e-14	2.89363e-10	1.95477e-11	1.37727e-12	5.78097e-09	6.31541e-13	2.70388e-08	2.15893e-16	5.36282e-15	9.54887e-13	8.47007e-13	1.63042e-10	7.22394e-08	1.84908e-13	3.10506e-12	4.91685e-11	4.31429e-13	1.10123e-14	3.84766e-10	8.12946e-13	2.51554e-13	1.32668e-12	6.55997e-09	1.31982e-08	1.31538e-11	4.36876e-12	9.37734e-11	1830.41	0.00024841	0.00045945	0.000524379	5.09115e-05	0.000412981	0.0885821	1.70656	0.00286478	0.087787	0.750887	6.99221e-06	0.00453521	0.0092937	372.287	0.000862617
6.25696e-13	1.27261e-12	1.10683e-14	9.28242e-16	4.12538e-17	8.46947e-13	4.04909e-14	7.3182e-14	3.22337e-10	2.61325e-11	1.40572e-12	3.49901e-09	5.41984e-13	4.72731e-08	3.30459e-16	5.05577e-15	5.02895e-13	9.04642e-13	2.33524e-10	7.40882e-08	3.05117e-13	4.19599e-12	4.99147e-11	3.97975e-13	1.18816e-14	4.20718e-10	7.31917e-13	2.41399e-13	1.6989e-12	8.38195e-09	9.10117e-09	1.45344e-11	4.49176e-12	8.58946e-11	1704.29	0.000255022	0.00046619	0.000368928	5.27403e-05	0.000413326	0.0603492	1.45537	0.00308644	0.0791395	0.902412	5.2252e-06	0.00565179	0.0160321	451.73	0.00155933
6.25545e-13	1.40432e-12	1.07243e-14	9.84971e-16	1.28476e-17	8.81394e-13	4.58866e-14	4.91235e-14	3.3567e-10	2.47543e-11	1.37989e-12	3.68594e-09	5.32107e-13	2.05429e-08	2.06398e-16	6.77509e-15	7.4163e-13	8.76624e-13	1.91736e-10	8.99336e-08	2.66926e-13	3.14104e-12	4.30222e-11	4.26541e-13	1.41202e-14	4.57184e-10	7.28506e-13	1.9932e-13	1.4931e-12	6.59656e-09	9.23793e-09	1.31906e-11	4.8761e-12	8.72139e-11	1556.52	0.000234402	0.000450096	0.000433086	5.98017e-05	0.000443469	0.0830379	1.37325	0.00276322	0.0533663	1.13055	8.01769e-06	0.00605364	0.010745	399.875	0.00126203
6.25905e-13	1.31539e-12	1.29802e-14	9.5903e-16	2.25975e-17	7.1747e-13	2.78825e-14	7.23487e-14	2.9872e-10	2.26419e-11	1.43114e-12	3.44814e-09	5.35483e-13	3.51046e-08	1.65316e-16	6.03125e-15	7.15848e-13	8.76337e-13	1.73181e-10	8.76237e-08	1.12828e-13	2.91352e-12	4.92054e-11	4.45137e-13	1.18043e-14	2.63997e-10	8.28656e-13	2.92175e-13	1.56854e-12	1.15342e-08	1.26132e-08	1.33844e-11	4.52111e-12	9.06651e-11	1625.41	0.000240748	0.000451819	0.000503639	5.92469e-05	0.000422894	0.0825514	1.57239	0.00432024	0.0699208	0.584908	5.97172e-06	0.0059656	0.005704	394.18	0.000993168
7.44527e-13	1.76158e-12	1.2929e-14	9.34955e-16	1.98691e-17	7.21931e-13	3.08665e-14	6.8454e-14	3.39722e-10	2.40486e-11	1.38254e-12	3.95989e-09	5.1205e-13	2.07878e-08	1.43586e-16	6.27493e-15	8.17003e-13	8.86487e-13	1.99426e-10	8.31062e-08	2.40821e-13	3.93268e-12	4.39621e-11	4.11665e-13	1.22116e-14	3.67975e-10	7.49711e-13	2.2039e-13	1.26421e-12	9.32109e-09	1.07559e-08	1.11621e-11	4.29031e-12	1.34727e-10	1868.17	0.000251	0.000462506	0.000381377	5.15009e-05	0.000515149	0.0957816	0.911698	0.0037407	0.0842537	0.395854	7.00089e-06	0.00643429	0.0146678	876.594	0.00171317
6.2575e-13	1.20885e-12	1.23088e-14	1.09605e-15	2.76158e-17	7.75432e-13	2.78392e-14	8.20799e-14	4.06622e-10	1.86105e-11	1.40443e-12	4.36943e-09	5.57118e-13	3.28304e-08	1.84433e-16	6.05372e-15	8.09855e-13	8.79121e-13	2.01009e-10	8.92774e-08	2.4274e-13	3.309e-12	5.11431e-11	4.54932e-13	1.36916e-14	3.97367e-10	7.63299e-13	2.689e-13	1.48342e-12	9.85121e-09	1.14474e-08	1.10478e-11	4.80694e-12	7.4931e-11	2064.03	0.00022062	0.000472251	0.000396722	5.57557e-05	0.000461148	0.0710051	1.88032	0.0037361	0.0660046	0.609127	5.16406e-06	0.00654013	0.0193249	544.533	0.0011849
6.96392e-13	1.33151e-12	1.24628e-14	9.57512e-16	2.11842e-17	7.2673e-13	3.9226e-14	6.50719e-14	4.7176e-10	2.56349e-11	1.3797e-12	3.80435e-09	6.47873e-13	3.44739e-08	2.43379e-16	6.17308e-15	7.81191e-13	8.29132e-13	1.53026e-10	9.71965e-08	2.32504e-13	3.1958e-12	4.56277e-11	4.28554e-13	1.17078e-14	3.76834e-10	7.54146e-13	2.22072e-13	1.19416e-12	1.08486e-08	9.81696e-09	9.79846e-12	3.95087e-12	8.41637e-11	2923.91	0.000244609	0.000465969	0.000322337	4.09509e-05	0.000352166	0.0796083	1.58035	0.00319726	0.0668343	0.59804	8.53234e-06	0.00418923	0.0136789	357.613	0.00142048
7.17651e-13	1.2849e-12	1.09496e-14	8.0321e-16	3.09379e-17	7.40249e-13	3.02011e-14	7.14233e-14	4.06294e-10	2.59874e-11	1.4261e-12	3.03716e-09	4.75606e-13	4.9361e-08	1.09936e-16	5.24872e-15	8.14049e-13	7.70445e-13	1.40697e-10	9.97334e-08	2.52084e-13	4.31465e-12	4.30116e-11	3.5926e-13	1.06699e-14	4.30279e-10	6.93057e-13	2.66274e-13	1.49934e-12	6.28477e-09	9.07463e-09	1.29532e-11	4.98807e-12	9.2973e-11	1780.57	0.000263094	0.000465121	0.000449319	4.8259e-05	0.00052563	0.0592194	1.39605	0.0028367	0.076365	0.653165	9.63006e-06	0.0058765	0.0138255	253.297	0.00124186
6.25677e-13	1.27844e-12	1.12974e-14	8.42922e-16	2.32965e-17	8.2332e-13	3.14047e-14	5.6635e-14	3.86829e-10	2.3093e-11	1.40559e-12	2.33204e-09	5.23097e-13	3.29702e-08	1.49403e-16	6.15578e-15	7.34892e-13	8.58332e-13	2.23288e-10	8.60667e-08	1.82313e-13	3.14232e-12	4.24688e-11	4.21202e-13	1.25271e-14	4.62319e-10	7.46839e-13	2.56574e-13	1.50727e-12	1.01346e-08	1.01822e-08	1.26505e-11	4.05636e-12	8.35058e-11	1943.73	0.00025284	0.000436304	0.000253624	5.35777e-05	0.000600826	0.0458837	1.21193	0.00454885	0.0278619	0.340335	6.90287e-06	0.00540177	0.0141904	440.332	0.00113382
6.25853e-13	1.33521e-12	1.16979e-14	9.21577e-16	4.39064e-17	7.23423e-13	3.57468e-14	7.65158e-14	4.76895e-10	2.27451e-11	1.37054e-12	5.0925e-09	5.76295e-13	3.47848e-08	1.70241e-16	5.90319e-15	7.30694e-13	7.72389e-13	1.37034e-10	9.61174e-08	2.75239e-13	3.46276e-12	4.21477e-11	3.97249e-13	1.03082e-14	3.73886e-10	7.07387e-13	2.41912e-13	1.28629e-12	8.69301e-09	1.00947e-08	1.04495e-11	4.99779e-12	8.4073e-11	2204.31	0.000246179	0.000487073	0.000430507	3.88372e-05	0.000447314	0.0704869	1.3973	0.0024099	0.0585964	0.743537	6.28066e-06	0.00525658	0.0150889	304.116	0.000991522
6.25692e-13	1.25963e-12	1.16925e-14	1.0327e-15	2.66187e-17	7.35073e-13	2.9488e-14	7.77934e-14	3.72159e-10	1.95963e-11	1.44233e-12	3.70018e-09	6.01223e-13	3.92749e-08	1.93903e-16	6.67466e-15	9.47959e-13	9.12817e-13	3.34679e-10	7.01143e-08	2.15716e-13	3.12851e-12	4.74992e-11	4.14459e-13	1.41251e-14	4.85928e-10	7.67591e-13	2.81616e-13	1.54917e-12	9.44726e-09	8.51671e-09	1.29159e-11	4.74138e-12	1.03936e-10	2024.3	0.000252853	0.000492539	0.000441547	4.5999e-05	0.000509534	0.0708354	1.69496	0.00329165	0.0671273	0.581981	6.36658e-06	0.00390522	0.0150015	441.254	0.00143686
7.32557e-13	1.2756e-12	1.05848e-14	9.92056e-16	2.28035e-17	8.22093e-13	4.44373e-14	7.91923e-14	4.47853e-10	2.02316e-11	1.44835e-12	4.23231e-09	6.28326e-13	2.4098e-08	1.43231e-16	6.15198e-15	8.96195e-13	8.06002e-13	2.00067e-10	8.66777e-08	1.84091e-13	3.10645e-12	4.28984e-11	3.94143e-13	1.46966e-14	3.89887e-10	8.00811e-13	2.8875e-13	1.61017e-12	6.283e-09	1.00431e-08	1.1192e-11	5.51189e-12	9.67599e-11	1592.94	0.000233344	0.000419348	0.000481941	3.90197e-05	0.000498771	0.0810381	1.72408	0.003177	0.0757855	0.579693	6.22866e-06	0.00636171	0.017007	391.36	0.0017367
6.25643e-13	1.33355e-12	1.20994e-14	1.01331e-15	2.30149e-17	7.75572e-13	4.15074e-14	6.12068e-14	3.00122e-10	2.00795e-11	1.40715e-12	4.00413e-09	6.461e-13	3.56474e-08	2.26915e-16	6.2413e-15	7.9402e-13	8.15522e-13	1.70143e-10	9.41448e-08	1.64224e-13	3.41738e-12	4.36552e-11	4.06717e-13	1.28891e-14	3.27203e-10	7.14514e-13	2.48904e-13	1.28557e-12	5.56501e-09	9.15647e-09	1.47212e-11	4.35838e-12	8.77316e-11	2395.38	0.000231705	0.000438333	0.000445998	4.68725e-05	0.000505628	0.0747009	1.50988	0.00390715	0.0716335	0.239427	6.89811e-06	0.00556813	0.0112033	503.949	0.00158005
6.25686e-13	1.32188e-12	1.13078e-14	1.00601e-15	2.14207e-17	8.18928e-13	3.10324e-14	5.52857e-14	3.1882e-10	1.8306e-11	1.41249e-12	3.55044e-09	6.70539e-13	2.9758e-08	1.64093e-16	6.25938e-15	7.43717e-13	8.85032e-13	1.52735e-10	8.0182e-08	2.34075e-13	3.04429e-12	3.97173e-11	4.61673e-13	1.41886e-14	4.08461e-10	7.8044e-13	2.52406e-13	1.57313e-12	8.32037e-09	9.21601e-09	1.25111e-11	5.05841e-12	1.06701e-10	2806.53	0.000239007	0.000457455	0.00046633	5.59558e-05	0.000530857	0.0741678	1.60325	0.00345857	0.0721615	0.530569	7.13127e-06	0.00488295	0.0155922	420.004	0.00109747
7.74263e-13	1.41016e-12	1.17518e-14	8.75144e-16	2.47738e-17	7.09942e-13	3.07906e-14	6.69613e-14	3.95276e-10	2.1931e-11	1.44939e-12	4.12901e-09	5.71396e-13	4.06016e-08	1.49415e-16	6.0913e-15	8.16812e-13	9.46893e-13	1.6052e-10	9.45558e-08	1.81062e-13	3.19445e-12	4.53228e-11	4.35059e-13	1.82915e-14	4.96991e-10	7.41912e-13	3.03768e-13	1.40827e-12	1.00277e-08	1.2003e-08	1.12863e-11	4.5333e-12	9.62701e-11	1478.09	0.000248401	0.000457532	0.000400308	5.75389e-05	0.000397242	0.0726426	1.26858	0.00329387	0.0133355	0.506297	6.35101e-06	0.00566364	0.016418	304.403	0.00113975
6.81526e-13	1.2704e-12	1.16075e-14	1.21696e-15	2.89613e-17	6.90143e-13	2.94837e-14	7.42831e-14	3.80013e-10	2.00376e-11	1.4414e-12	4.44292e-09	5.40172e-13	2.73701e-08	1.58087e-16	6.78108e-15	5.2771e-13	8.41559e-13	2.17674e-10	8.46624e-08	2.75917e-13	3.34652e-12	4.439e-11	3.90123e-13	1.5294e-14	3.3286e-10	6.95952e-13	2.82421e-13	1.51156e-12	7.05548e-09	8.82454e-09	1.52894e-11	4.27008e-12	1.13381e-10	1589.27	0.000243652	0.00045621	0.000368938	5.49237e-05	0.000525324	0.0903611	1.77145	0.00282939	0.0640234	0.544238	6.17537e-06	0.00558364	0.0150698	474.539	0.00140752
6.25726e-13	1.3796e-12	1.40222e-14	9.93209e-16	2.1211e-17	7.93843e-13	3.71422e-14	5.26986e-14	4.20583e-10	2.18166e-11	1.36199e-12	3.81856e-09	5.7222e-13	2.34258e-08	1.86799e-16	6.52804e-15	6.05237e-13	8.93761e-13	1.63189e-10	7.33804e-08	1.84873e-13	3.06428e-12	4.26906e-11	4.44785e-13	1.01819e-14	3.99837e-10	8.08653e-13	2.21301e-13	1.66138e-12	9.2438e-09	1.01259e-08	1.11714e-11	4.72724e-12	7.90125e-11	1888.72	0.000255039	0.000464142	0.000350874	4.59371e-05	0.000527111	0.0794745	1.54924	0.00474635	0.0836326	0.392533	7.13277e-06	0.0051247	0.0148394	445.302	0.00110835
6.25891e-13	1.31786e-12	1.07018e-14	1.04251e-15	2.97126e-17	7.19442e-13	4.91556e-14	7.34456e-14	3.33331e-10	3.32168e-11	1.36211e-12	5.15711e-09	7.32265e-13	3.2707e-08	1.73222e-16	7.63995e-15	8.02804e-13	8.92779e-13	1.60089e-10	8.99142e-08	1.60793e-13	3.1588e-12	4.83892e-11	4.41547e-13	1.33574e-14	5.06369e-10	7.6352e-13	2.11817e-13	1.52992e-12	1.00685e-08	9.27713e-09	1.22198e-11	4.67818e-12	1.17591e-10	1926.47	0.000237822	0.000496556	0.000533413	4.94481e-05	0.000409617	0.0728029	1.45097	0.0032539	0.0691407	0.520368	9.17869e-06	0.00473993	0.0136551	379.078	0.0016795
6.25615e-13	1.38491e-12	1.14918e-14	9.50456e-16	2.97482e-17	7.78021e-13	3.25766e-14	6.36195e-14	3.94451e-10	2.13155e-11	1.35691e-12	2.98906e-09	5.01934e-13	3.53255e-08	1.88631e-16	4.67627e-15	6.03178e-13	9.67599e-13	1.75826e-10	9.72032e-08	2.30075e-13	3.06414e-12	5.34202e-11	5.09365e-13	1.2482e-14	3.18223e-10	8.64456e-13	2.11688e-13	1.45786e-12	1.2264e-08	1.12094e-08	1.30903e-11	4.4713e-12	1.09673e-10	1915.47	0.000245439	0.000438271	0.000364569	4.66264e-05	0.000493761	0.0881549	1.44581	0.00440365	0.0817583	0.593345	7.61502e-06	0.00421513	0.0169768	406.499	0.00112574
7.40339e-13	1.2703e-12	1.19112e-14	9.39872e-16	3.06443e-17	7.73288e-13	3.1821e-14	5.97941e-14	4.23032e-10	2.17377e-11	1.43361e-12	3.2723e-09	6.35767e-13	2.85977e-08	2.06087e-16	6.08923e-15	8.41649e-13	8.21969e-13	1.51193e-10	6.71471e-08	1.86457e-13	3.15559e-12	4.4011e-11	3.84529e-13	1.29339e-14	4.06104e-10	6.54157e-13	2.63707e-13	1.64464e-12	1.03369e-08	1.11763e-08	1.28918e-11	5.12012e-12	8.23529e-11	1660.21	0.000243971	0.00043989	0.000452142	4.06537e-05	0.000509297	0.0717836	1.67621	0.00315715	0.0633873	0.692789	7.21484e-06	0.0064805	0.0143422	393.248	0.00133202
6.25918e-13	1.44896e-12	1.55127e-14	9.89241e-16	2.34835e-17	7.05605e-13	4.05973e-14	6.27888e-14	4.0158e-10	2.16947e-11	1.36824e-12	3.51819e-09	4.7344e-13	2.588e-08	1.86394e-16	7.60997e-15	5.14008e-13	9.006e-13	1.62048e-10	8.37179e-08	1.67471e-13	2.98007e-12	4.45859e-11	4.43232e-13	1.25608e-14	3.79671e-10	7.38702e-13	2.16943e-13	1.56015e-12	1.07991e-08	1.05266e-08	1.09057e-11	4.97156e-12	1.15239e-10	1933.45	0.000235429	0.000450026	0.000383064	4.51042e-05	0.000487281	0.0845386	1.33101	0.00326902	0.0607423	0.736608	7.45318e-06	0.00542885	0.0200672	450.953	0.00121225
6.25724e-13	1.39156e-12	1.12898e-14	8.85272e-16	2.28163e-17	7.98312e-13	2.7572e-14	6.72157e-14	3.11076e-10	2.03441e-11	1.38634e-12	3.86021e-09	6.97514e-13	2.76236e-08	2.33113e-16	6.29735e-15	8.72245e-13	8.01344e-13	1.97342e-10	7.56652e-08	3.2483e-13	2.83031e-12	4.9305e-11	4.32848e-13	1.17682e-14	3.26847e-10	7.14128e-13	2.35263e-13	1.23875e-12	9.54706e-09	9.46984e-09	1.13185e-11	4.2413e-12	1.28033e-10	1587.57	0.000244047	0.000430463	0.000425395	4.32993e-05	0.000458856	0.0598344	1.2459	0.00496909	0.0707402	0.423622	7.59682e-06	0.0063341	0.0109454	516.992	0.00128307
6.25787e-13	1.37888e-12	1.10939e-14	7.80459e-16	2.18198e-17	7.91067e-13	2.89453e-14	7.12871e-14	4.45284e-10	2.03001e-11	1.42808e-12	3.77645e-09	5.587e-13	3.41629e-08	1.92162e-16	5.37588e-15	8.35163e-13	8.39282e-13	1.59985e-10	6.97981e-08	1.43245e-13	2.60112e-12	4.33601e-11	4.27065e-13	1.11219e-14	4.53222e-10	7.67411e-13	2.74521e-13	1.56514e-12	1.12557e-08	9.26341e-09	1.23417e-11	5.53081e-12	1.02901e-10	1403.99	0.000249589	0.000448533	0.000481835	4.16259e-05	0.000712848	0.0831216	1.49254	0.00332687	0.077426	0.726812	6.99221e-06	0.00630398	0.0181873	428.963	0.00103063
6.21295e-13	1.30319e-12	1.35383e-14	1.1784e-15	2.74687e-17	7.42943e-13	4.34873e-14	4.72946e-14	6.80106e-10	2.27786e-11	1.43135e-12	4.36536e-09	4.93358e-13	4.08152e-08	2.67757e-16	4.99493e-15	9.67423e-13	7.62292e-13	1.44955e-10	9.70089e-08	1.51072e-13	2.879e-12	4.6899e-11	3.9896e-13	1.35534e-14	5.03033e-10	7.24573e-13	2.8345e-13	1.48828e-12	1.14676e-08	9.37747e-09	1.28585e-11	4.88034e-12	8.94604e-11	2489.22	0.000225305	0.000421086	0.000413963	3.85632e-05	0.0005986	0.080386	1.73682	0.00421542	0.0801558	0.695289	6.79303e-06	0.00546252	0.0183529	399.512	0.000932019
6.25673e-13	1.21663e-12	1.10849e-14	8.94481e-16	2.14086e-17	7.44493e-13	3.54818e-14	3.94039e-14	4.52778e-10	2.41085e-11	1.44533e-12	3.77129e-09	6.33505e-13	2.26325e-08	1.07736e-16	5.90699e-15	6.89448e-13	7.92244e-13	1.79219e-10	7.58463e-08	1.71267e-13	2.90928e-12	4.56837e-11	3.80789e-13	1.06604e-14	3.47732e-10	6.54214e-13	2.73152e-13	1.45045e-12	8.41988e-09	9.99365e-09	1.34372e-11	4.79527e-12	9.62985e-11	1812.63	0.00023446	0.000425074	0.000414996	5.10743e-05	0.000562572	0.0589312	1.59582	0.00436786	0.0771522	0.279223	4.44273e-06	0.00391674	0.0152805	392.635	0.00111333
7.15638e-13	1.3637e-12	1.60414e-14	7.71519e-16	2.37034e-17	8.83287e-13	4.15895e-14	6.79362e-14	3.2848e-10	2.62283e-11	1.4142e-12	3.66171e-09	5.24399e-13	2.74366e-08	1.46342e-16	6.80467e-15	5.45654e-13	7.27761e-13	1.85861e-10	7.50883e-08	2.09117e-13	3.63229e-12	4.42798e-11	3.62059e-13	1.15436e-14	3.95097e-10	6.4283e-13	2.51436e-13	1.33387e-12	9.38093e-09	9.66723e-09	1.02602e-11	4.50145e-12	1.06068e-10	1906.57	0.00024633	0.000416973	0.00050259	5.25119e-05	0.000465789	0.0799462	1.55033	0.00236281	0.0656905	0.752028	5.84602e-06	0.00755715	0.0106944	406.873	0.00169699
6.25643e-13	1.40341e-12	1.2283e-14	1.00397e-15	2.21434e-17	7.37013e-13	3.74001e-14	5.07386e-14	3.51037e-10	2.25202e-11	1.39209e-12	5.65244e-09	5.39988e-13	1.8533e-08	4.9763e-16	6.60913e-15	7.28282e-13	7.62555e-13	1.75539e-10	8.01101e-08	2.20022e-13	3.84017e-12	4.15183e-11	3.86506e-13	1.18839e-14	4.67355e-10	6.32619e-13	2.32852e-13	1.2257e-12	8.96658e-09	9.48319e-09	1.11449e-11	4.3772e-12	6.38274e-11	1722.25	0.000229259	0.000469595	0.000454682	3.48653e-05	0.00049942	0.0693545	1.2695	0.00272327	0.0843969	0.720483	7.49696e-06	0.00474951	0.0145595	386.032	0.000998935
6.25689e-13	1.30466e-12	1.09407e-14	9.74337e-16	2.76168e-17	8.12323e-13	2.30574e-14	5.0978e-14	3.5517e-10	1.80903e-11	1.41324e-12	3.60412e-09	5.53402e-13	2.45043e-08	1.62579e-16	5.57604e-15	6.40244e-13	8.02857e-13	1.6704e-10	7.74673e-08	2.12439e-13	3.32605e-12	4.37472e-11	3.92594e-13	1.3409e-14	6.85158e-10	7.58954e-13	2.44499e-13	1.355e-12	9.74302e-09	8.71855e-09	1.55651e-11	5.2224e-12	8.67116e-11	2459.26	0.000254617	0.000434075	0.000413616	6.64483e-05	0.000287005	0.0687902	1.44705	0.00317267	0.0844553	0.576152	6.31364e-06	0.00585515	0.0164278	475.066	0.000906438
7.40864e-13	1.28937e-12	1.0882e-14	8.68592e-16	2.3059e-17	7.84766e-13	2.94632e-14	6.63815e-14	4.08132e-10	2.37906e-11	1.44399e-12	3.74281e-09	6.78958e-13	4.42394e-08	1.94709e-16	6.24836e-15	6.8543e-13	9.21031e-13	2.31259e-10	9.97722e-08	2.20898e-13	3.08303e-12	4.62531e-11	4.24308e-13	1.03356e-14	4.51532e-10	7.24041e-13	2.67493e-13	1.70036e-12	7.98233e-09	8.63232e-09	1.07387e-11	5.05959e-12	9.87317e-11	1413.13	0.000255896	0.000484545	0.000474555	4.60298e-05	0.000483375	0.0761926	1.75348	0.00341296	0.0815689	0.67304	9.44163e-06	0.00596557	0.0158624	475.391	0.0016488
1.21149e-12	1.37318e-12	1.26088e-14	8.81534e-16	2.42359e-17	7.43471e-13	3.20698e-14	6.76479e-14	4.57148e-10	2.0443e-11	1.45167e-12	3.696e-09	4.79019e-13	3.42061e-08	1.49605e-16	6.49816e-15	9.22276e-13	9.0961e-13	1.60448e-10	8.57772e-08	2.1448e-13	3.43826e-12	4.65786e-11	4.21153e-13	1.23506e-14	4.12656e-10	7.20928e-13	2.86466e-13	1.41898e-12	1.01655e-08	1.043e-08	1.07244e-11	4.93925e-12	8.17927e-11	2273.31	0.000270806	0.000461738	0.000246604	5.27984e-05	0.000436229	0.0633002	1.2201	0.00381381	0.0245907	0.584644	7.13917e-06	0.0063736	0.0162959	674.714	0.00136846
6.25752e-13	1.30603e-12	1.20612e-14	9.09665e-16	2.03039e-17	7.45267e-13	4.43313e-14	7.25824e-14	4.62493e-10	2.48208e-11	1.40696e-12	6.01092e-09	5.91832e-13	3.4453e-08	1.86606e-16	4.93069e-15	5.88226e-13	7.57847e-13	1.3895e-10	8.28981e-08	2.06221e-13	2.67284e-12	4.37924e-11	3.97043e-13	1.26001e-14	4.18431e-10	7.5041e-13	2.68485e-13	1.47045e-12	7.57272e-09	1.03512e-08	7.87319e-12	4.68575e-12	9.14556e-11	1313.2	0.00022736	0.000435092	0.000280373	5.41e-05	0.000551614	0.0797491	1.50897	0.00377773	0.0561831	0.749327	7.02109e-06	0.00540172	0.0153052	586.703	0.00127814
6.25551e-13	1.30613e-12	1.40882e-14	8.22e-16	2.7394e-17	8.7872e-13	2.3097e-14	6.99888e-14	4.03493e-10	2.15903e-11	1.32928e-12	3.93064e-09	5.5154e-13	4.2281e-08	1.51174e-16	5.57198e-15	7.78793e-13	9.03118e-13	2.19352e-10	9.98388e-08	2.24126e-13	2.96668e-12	4.9785e-11	4.45988e-13	1.31643e-14	4.54351e-10	7.94195e-13	1.76299e-13	1.42556e-12	6.08427e-09	8.20912e-09	1.52458e-11	5.12071e-12	9.77182e-11	2258.09	0.000258033	0.000459525	0.000382753	4.30246e-05	0.000538768	0.0831062	1.55039	0.00360116	0.0549609	0.498461	7.30715e-06	0.00500377	0.0141155	404.984	0.00115663
7.04617e-13	1.28428e-12	1.12231e-14	7.87324e-16	2.73799e-17	7.69686e-13	3.79502e-14	8.30187e-14	4.00182e-10	2.14861e-11	1.43253e-12	3.74093e-09	5.56969e-13	2.77713e-08	2.03357e-16	5.41274e-15	6.92098e-13	8.37079e-13	1.70923e-10	8.02238e-08	2.16149e-13	2.91175e-12	4.60321e-11	4.03068e-13	1.37878e-14	4.02148e-10	7.36186e-13	2.97393e-13	1.48233e-12	8.58322e-09	9.6737e-09	1.56325e-11	4.92704e-12	9.43659e-11	2008.19	0.000253557	0.000456415	0.000460016	4.60076e-05	0.000513578	0.0814456	1.66565	0.0041756	0.0706031	0.698149	5.92223e-06	0.00676822	0.0146827	398.286	0.00127289
6.25745e-13	1.27805e-12	1.07389e-14	8.9378e-16	2.62872e-17	7.91048e-13	3.61679e-14	5.73346e-14	2.99582e-10	2.27341e-11	1.45416e-12	4.84413e-09	5.8143e-13	3.90723e-08	1.81341e-16	5.55672e-15	8.47756e-13	8.10284e-13	1.21875e-10	7.39365e-08	1.88113e-13	3.4359e-12	4.8149e-11	3.90865e-13	1.18357e-14	3.16239e-10	8.15408e-13	2.91336e-13	1.3234e-12	9.70573e-09	8.86525e-09	1.27363e-11	4.2199e-12	8.84058e-11	1716.58	0.000247069	0.000450612	0.000461154	3.72229e-05	0.000400395	0.0592897	1.34927	0.00315551	0.0811253	0.384255	5.65802e-06	0.00553119	0.0109468	403.257	0.00144329
7.36189e-13	1.43052e-12	1.17905e-14	1.20752e-15	3.08793e-17	8.33615e-13	2.52442e-14	6.40993e-14	3.60042e-10	2.1526e-11	1.41977e-12	3.47706e-09	6.79657e-13	3.83275e-08	1.93868e-16	6.07662e-15	8.19502e-13	8.32779e-13	2.8006e-10	8.69029e-08	1.9953e-13	2.86284e-12	5.38668e-11	4.3853e-13	1.55531e-14	3.81772e-10	7.40252e-13	2.45756e-13	1.52269e-12	4.29731e-09	1.09581e-08	1.4428e-11	5.38611e-12	1.18137e-10	1865.2	0.000246812	0.000462868	0.000426279	4.32499e-05	0.000507371	0.0683072	1.24573	0.004727	0.0723713	0.591383	8.0997e-06	0.00779905	0.0128855	371.062	0.00126666
6.25705e-13	1.34734e-12	1.45095e-14	9.66929e-16	2.09012e-17	7.22636e-13	2.75749e-14	7.22939e-14	3.48349e-10	2.28504e-11	1.40236e-12	3.57548e-09	5.17231e-13	2.65487e-08	1.90229e-16	4.83533e-15	7.88991e-13	9.34219e-13	2.47446e-10	9.98646e-08	2.25715e-13	2.87887e-12	4.84974e-11	4.87822e-13	1.17128e-14	3.83985e-10	8.31119e-13	2.6219e-13	1.51314e-12	7.77457e-09	1.10689e-08	1.19682e-11	5.04999e-12	1.00547e-10	1363.74	0.000254424	0.000455798	0.00037735	4.37303e-05	0.000508224	0.081744	1.44635	0.00371415	0.0762042	0.531824	6.92995e-06	0.00460524	0.0126178	331.922	0.00125178
6.25761e-13	1.3301e-12	1.15906e-14	1.00199e-15	2.01575e-17	7.44858e-13	2.46479e-14	8.08151e-14	3.89687e-10	1.74087e-11	1.41422e-12	3.23473e-09	6.30896e-13	3.08204e-08	1.57336e-16	5.64108e-15	6.63326e-13	8.37719e-13	1.51507e-10	7.10131e-08	2.1131e-13	2.99163e-12	4.59763e-11	3.98232e-13	1.2568e-14	4.77118e-10	6.8943e-13	2.77628e-13	1.51471e-12	9.88268e-09	1.00106e-08	1.23917e-11	4.93573e-12	9.36155e-11	2033.71	0.000228982	0.000470551	0.000351436	4.9651e-05	0.000577086	0.0835338	1.70736	0.0032991	0.0974567	0.647636	6.15256e-06	0.00625616	0.0159968	521.57	0.00114204
6.84776e-13	9.37073e-13	1.17524e-14	6.8444e-16	1.66388e-17	8.17637e-13	2.96084e-14	6.85303e-14	3.04762e-10	2.19354e-11	1.39789e-12	3.53627e-09	5.39122e-13	3.31974e-08	1.79957e-16	5.83896e-15	8.79475e-13	8.34579e-13	1.35948e-10	8.56779e-08	2.45863e-13	3.10792e-12	4.69045e-11	4.29623e-13	1.28728e-14	3.47956e-10	7.21069e-13	2.34925e-13	1.5432e-12	9.46824e-09	9.24088e-09	1.36117e-11	4.64567e-12	9.56296e-11	1539.14	0.000248066	0.000464409	0.000421734	4.262e-05	0.00048108	0.0136898	1.78109	0.00309107	0.0422656	0.693508	7.09652e-06	0.00885148	0.0127896	455.831	0.00128169
6.25734e-13	1.27031e-12	1.34982e-14	1.11622e-15	2.35627e-17	8.1743e-13	2.55235e-14	7.30139e-14	5.27633e-10	2.51151e-11	1.4289e-12	3.33981e-09	6.1552e-13	2.34769e-08	1.77427e-16	6.68553e-15	7.26427e-13	8.49312e-13	1.55626e-10	9.9994e-08	2.0882e-13	2.54093e-12	4.69816e-11	4.35175e-13	1.16309e-14	3.64819e-10	6.86036e-13	2.74442e-13	1.3044e-12	8.61496e-09	1.05441e-08	1.2372e-11	3.85657e-12	8.01056e-11	2100.22	0.000238417	0.000453855	0.000433869	4.19132e-05	0.0004817	0.0765996	1.81173	0.00379494	0.0746692	0.788395	5.07119e-06	0.00529317	0.0148863	354.714	0.00105652
6.25662e-13	1.27454e-12	1.28239e-14	8.7055e-16	2.44362e-17	7.40719e-13	3.2953e-14	7.1677e-14	3.33662e-10	1.95419e-11	1.33725e-12	3.17456e-09	6.94908e-13	4.23116e-08	1.89233e-16	6.60722e-15	7.31393e-13	7.11842e-13	1.13275e-10	8.73681e-08	1.76494e-13	3.10141e-12	4.57876e-11	4.03828e-13	1.28267e-14	3.70159e-10	6.72181e-13	1.89026e-13	1.45953e-12	8.8914e-09	8.84777e-09	1.26642e-11	4.61217e-12	9.39814e-11	2230.08	0.000226577	0.000433756	0.00028662	3.99413e-05	0.00036724	0.0633327	1.47892	0.00368979	0.0569371	0.579448	5.1363e-06	0.00312325	0.0111864	392.761	0.00118513
7.83199e-13	1.27984e-12	1.12227e-14	1.66678e-15	2.63393e-17	9.0515e-13	4.22605e-14	7.26853e-14	3.14457e-10	1.87061e-11	1.37808e-12	6.00624e-09	7.27828e-13	2.78203e-08	1.09133e-16	6.27293e-15	6.03352e-13	8.44826e-13	1.41797e-10	7.26637e-08	1.68234e-13	4.02391e-12	3.89328e-11	4.18268e-13	1.55098e-14	4.00151e-10	7.53317e-13	2.28757e-13	1.45524e-12	8.79391e-09	9.49414e-09	1.58476e-11	5.16868e-12	1.01353e-10	1987.56	0.000245842	0.000443804	0.000477818	4.60425e-05	0.000573823	0.0634127	1.49021	0.00425551	0.0511141	0.646498	5.30845e-06	0.00762769	0.00993614	399.659	0.00165805
6.76117e-13	1.18411e-12	1.17775e-14	7.50067e-16	2.2114e-17	7.3667e-13	3.22123e-14	7.30674e-14	4.04167e-10	3.00914e-11	1.42962e-12	3.83576e-09	4.36505e-13	2.90613e-08	1.79933e-16	6.0492e-15	8.10564e-13	8.62314e-13	1.26435e-10	7.33984e-08	3.14834e-13	3.20068e-12	5.08849e-11	4.25584e-13	1.08786e-14	3.77144e-10	7.17474e-13	2.53923e-13	1.39253e-12	6.69544e-09	1.04724e-08	1.28057e-11	4.17909e-12	8.01849e-11	2197.13	0.000244215	0.000474972	0.000244252	3.55424e-05	0.000510026	0.0770682	2.11554	0.00348747	0.072257	0.661202	8.70117e-06	0.00602095	0.0154925	413.969	0.00163628
7.12605e-13	1.41581e-12	1.32144e-14	9.76902e-16	2.27722e-17	7.33675e-13	4.00254e-14	7.30712e-14	2.63077e-10	2.57531e-11	1.40183e-12	3.75824e-09	5.54415e-13	2.49254e-08	1.92865e-16	5.48225e-15	7.52979e-13	7.71836e-13	1.64353e-10	9.04705e-08	1.08684e-13	2.92295e-12	4.6014e-11	4.00799e-13	1.39836e-14	3.54356e-10	7.45616e-13	2.65815e-13	1.45481e-12	8.37345e-09	8.7428e-09	2.12006e-11	5.32171e-12	8.38496e-11	1974.3	0.000253858	0.000450965	0.000415346	5.3768e-05	0.00038091	0.089672	1.47987	0.00308723	0.0640795	0.558856	5.95693e-06	0.00585094	0.00980749	370.439	0.00128818
7.4198e-13	1.2589e-12	1.0813e-14	7.20037e-16	2.05697e-17	7.33654e-13	3.58856e-14	5.4124e-14	4.10283e-10	2.08351e-11	1.43462e-12	2.97722e-09	6.40553e-13	3.97305e-08	1.71701e-16	6.32748e-15	7.96847e-13	8.43683e-13	2.62659e-10	8.52756e-08	2.19474e-13	3.10732e-12	4.82384e-11	4.25951e-13	1.27438e-14	3.65259e-10	8.03089e-13	2.72516e-13	1.45189e-12	1.00868e-08	9.28082e-09	1.17847e-11	5.022e-12	9.8199e-11	2140.76	0.000256108	0.000465689	0.000428376	4.50711e-05	0.000434508	0.071638	1.60303	0.0034135	0.0584696	0.441023	6.53448e-06	0.00623146	0.0142284	469.993	0.00126699
6.96153e-13	1.23389e-12	1.23599e-14	7.04642e-16	1.65171e-17	8.55089e-13	2.94851e-14	6.32957e-14	3.39449e-10	4.00241e-11	1.44426e-12	3.75987e-09	4.20322e-13	2.70814e-08	1.7051e-16	5.94901e-15	7.62895e-13	8.74621e-13	2.1116e-10	7.91241e-08	2.31535e-13	3.22981e-12	4.76098e-11	4.20512e-13	1.00798e-14	3.64642e-10	7.39156e-13	2.49293e-13	1.30144e-12	3.44468e-09	1.22228e-08	1.19348e-11	4.41195e-12	9.06242e-11	2350.93	0.000244112	0.000441833	0.000283381	4.61954e-05	0.000628147	0.0707588	1.8031	0.0047308	0.0732962	0.666863	8.16424e-06	0.00578027	0.012817	453.127	0.00148041
6.25678e-13	1.1916e-12	1.35256e-14	8.35908e-16	2.12636e-17	7.64549e-13	3.56976e-14	6.71264e-14	3.14047e-10	1.78192e-11	1.36821e-12	4.87819e-09	6.56794e-13	3.53966e-08	1.69693e-16	6.37727e-15	9.03463e-13	8.60323e-13	1.18716e-10	9.45774e-08	2.28147e-13	2.75369e-12	4.3933e-11	3.85612e-13	1.27724e-14	3.25824e-10	7.39935e-13	2.22217e-13	1.42884e-12	8.60086e-09	1.05246e-08	1.23778e-11	4.53047e-12	7.59436e-11	2091.49	0.000238498	0.000436123	0.000432621	4.58594e-05	0.000536619	0.0719188	1.79702	0.00343431	0.0372658	0.684744	7.03635e-06	0.00536681	0.0162622	553.253	0.0011182
8.19326e-13	1.26874e-12	1.33326e-14	1.00184e-15	2.83113e-17	7.19528e-13	3.64402e-14	9.4496e-14	3.82292e-10	2.38299e-11	1.3719e-12	3.89163e-09	5.17809e-13	2.21701e-08	2.25727e-16	5.58867e-15	6.14359e-13	8.18952e-13	1.34146e-10	9.69241e-08	1.94526e-13	3.96241e-12	4.79083e-11	4.05559e-13	1.10304e-14	4.67292e-10	7.41569e-13	2.40873e-13	1.42147e-12	1.20176e-08	9.82087e-09	1.28155e-11	5.41446e-12	9.5934e-11	1885.47	0.000229267	0.00043067	0.000515943	3.30631e-05	0.000474502	0.0718131	1.52462	0.00528499	0.122949	0.711737	7.12083e-06	0.00590391	0.0149223	560.518	0.00161988
6.2569e-13	1.27842e-12	1.42338e-14	1.0632e-15	2.79852e-17	7.91254e-13	3.89466e-14	6.24299e-14	3.96469e-10	2.53328e-11	1.38006e-12	3.56182e-09	5.68095e-13	3.29667e-08	2.69104e-16	5.26289e-15	8.04177e-13	8.28309e-13	1.59487e-10	7.57587e-08	1.74478e-13	4.03839e-12	4.27286e-11	3.89292e-13	1.10155e-14	3.73915e-10	8.35115e-13	2.36648e-13	1.28094e-12	1.02463e-08	9.21098e-09	1.59196e-11	4.80544e-12	9.8468e-11	2201.69	0.000256279	0.000441443	0.000508162	4.942e-05	0.000563192	0.0728258	1.61393	0.00386905	0.070618	0.654275	7.26352e-06	0.00593901	0.0162218	415.192	0.00120646
6.25633e-13	1.33545e-12	1.12981e-14	8.09584e-16	2.54864e-17	7.30395e-13	3.10417e-14	8.02998e-14	3.2469e-10	2.57668e-11	1.38757e-12	7.0004e-09	6.1101e-13	2.69801e-08	1.69424e-16	6.01471e-15	7.12495e-13	8.32456e-13	1.95173e-10	9.03335e-08	1.68249e-13	3.4408e-12	4.54354e-11	4.18006e-13	1.03599e-14	4.502e-10	6.8067e-13	2.67492e-13	1.78544e-12	9.76984e-09	8.48051e-09	9.56092e-12	6.1488e-12	8.55152e-11	1837.48	0.00022367	0.000459715	0.000445195	4.58468e-05	0.000478733	0.079317	1.57164	0.00326968	0.0597485	0.283705	6.0356e-06	0.00536731	0.0177494	484.054	0.00149823
8.56272e-13	1.5685e-12	1.58119e-14	1.13412e-15	2.60718e-17	8.02363e-13	3.88205e-14	7.04384e-14	3.43684e-10	1.87746e-11	1.36262e-12	3.608e-09	5.54411e-13	3.06804e-08	1.87405e-16	6.6349e-15	1.12942e-12	9.01723e-13	1.45565e-10	8.38655e-08	2.0192e-13	3.87919e-12	4.41637e-11	3.92317e-13	1.11224e-14	4.81503e-10	7.13186e-13	2.30153e-13	1.36414e-12	1.10792e-08	9.73025e-09	1.07439e-11	4.64874e-12	7.05321e-11	1805.26	0.0002524	0.000444998	0.000277046	4.36226e-05	0.000562973	0.106281	1.31022	0.00250218	0.0743512	0.471883	6.1451e-06	0.00615782	0.0114958	454.651	0.00130816
6.25705e-13	1.30663e-12	1.21634e-14	9.84918e-16	2.22689e-17	7.7741e-13	2.7606e-14	8.40385e-14	3.0859e-10	1.95784e-11	1.39265e-12	3.08622e-09	6.14292e-13	2.47223e-08	1.20116e-16	6.01801e-15	4.21516e-13	8.24322e-13	1.44732e-10	8.51103e-08	1.99954e-13	2.9649e-12	4.0391e-11	4.3121e-13	9.82258e-15	4.45254e-10	7.39013e-13	2.68519e-13	1.39002e-12	1.14463e-08	7.70374e-09	1.09096e-11	4.32661e-12	8.33514e-11	1539.14	0.000245117	0.000447189	0.000431514	4.83249e-05	0.000510629	0.0876843	1.67781	0.00312755	0.0672849	0.617495	3.32585e-06	0.00572771	0.0128602	401.286	0.00104496
6.25775e-13	1.24809e-12	1.13321e-14	9.72194e-16	3.07467e-17	7.9901e-13	2.99394e-14	5.72053e-14	3.87105e-10	2.18066e-11	1.41161e-12	4.40583e-09	5.30262e-13	3.90682e-08	1.77938e-16	5.10505e-15	6.15873e-13	7.76845e-13	1.38875e-10	7.87408e-08	2.46041e-13	2.75404e-12	4.76581e-11	3.98392e-13	1.29327e-14	4.19459e-10	7.06745e-13	2.56857e-13	1.34606e-12	8.56766e-09	7.93002e-09	1.41016e-11	4.47891e-12	1.13838e-10	2040.79	0.000253375	0.000458326	0.00056001	5.9862e-05	0.000644408	0.0776455	1.70662	0.00330305	0.0686064	0.357827	7.11855e-06	0.0055679	0.0112772	306.184	0.00105178
6.6606e-13	1.4309e-12	1.06489e-14	9.73286e-16	3.07248e-17	7.88261e-13	3.51379e-14	7.0516e-14	3.62404e-10	2.16049e-11	1.45461e-12	3.68764e-09	5.32556e-13	3.95786e-08	1.91991e-16	5.50121e-15	8.08662e-13	8.62747e-13	1.58153e-10	8.51448e-08	2.19997e-13	2.85821e-12	5.15702e-11	4.38574e-13	1.00839e-14	3.33246e-10	7.75498e-13	2.80301e-13	1.46973e-12	1.08325e-08	1.06816e-08	1.17295e-11	5.11997e-12	1.04185e-10	1731.27	0.000233996	0.000426263	0.000364206	5.17293e-05	0.000456799	0.0847672	1.47865	0.00303262	0.072039	0.668177	5.85977e-06	0.00538675	0.00608908	437.519	0.00166708
6.21315e-13	1.64017e-12	1.1157e-14	7.29287e-16	3.17148e-17	7.9936e-13	3.588e-14	6.21063e-14	3.18946e-10	2.6288e-11	1.40054e-12	3.01638e-09	4.86613e-13	3.19594e-08	1.7282e-16	3.61833e-15	5.54031e-13	7.28706e-13	1.26661e-10	7.22359e-08	2.69122e-13	2.9803e-12	4.26212e-11	3.57777e-13	1.0997e-14	4.61506e-10	6.63466e-13	2.67027e-13	1.38553e-12	9.1733e-09	8.28915e-09	1.20656e-11	5.41492e-12	7.27167e-11	1960.61	0.000241553	0.000458513	0.000348667	4.56944e-05	0.000698578	0.0756109	0.923004	0.00307892	0.0581084	0.641016	3.46241e-06	0.00542334	0.0143769	317.18	0.000857914
6.25731e-13	1.52594e-12	2.05064e-14	7.52944e-16	2.26051e-17	7.62094e-13	3.56081e-14	6.06976e-14	3.32272e-10	2.19117e-11	1.44248e-12	4.78567e-09	5.58277e-13	1.80743e-08	2.06369e-16	6.39326e-15	1.00282e-12	9.15883e-13	1.75734e-10	9.97038e-08	2.88622e-13	3.32998e-12	4.87293e-11	4.1511e-13	1.18536e-14	4.52691e-10	7.31234e-13	2.7372e-13	1.37668e-12	8.5987e-09	1.06546e-08	1.33616e-11	4.36253e-12	9.63863e-11	2639.15	0.000241576	0.000446597	0.000275372	4.82294e-05	0.0004891	0.0748751	1.11904	0.00288972	0.0724054	0.4811	6.17186e-06	0.0058039	0.00967642	383.26	0.00169178
7.28991e-13	1.55503e-12	1.08594e-14	8.96713e-16	2.39167e-17	8.53271e-13	4.5963e-14	6.90964e-14	3.39099e-10	1.83153e-11	1.42016e-12	2.63452e-09	5.64335e-13	4.03756e-08	1.85476e-16	6.73667e-15	7.78695e-13	7.94852e-13	1.76054e-10	7.77744e-08	1.43952e-13	3.02396e-12	4.26202e-11	4.00083e-13	1.34136e-14	2.13166e-10	7.29649e-13	2.66268e-13	1.50205e-12	9.65809e-09	1.08237e-08	1.10578e-11	4.41095e-12	1.05788e-10	2214.41	0.000241971	0.000444375	0.000524657	4.57801e-05	0.000439974	0.0784054	1.04878	0.00340961	0.0584864	0.748335	7.20959e-06	0.00725865	0.0127701	340.863	0.00128197
6.25679e-13	1.24149e-12	1.78044e-14	6.62735e-16	1.90656e-17	8.11288e-13	2.79052e-14	6.60802e-14	4.34131e-10	1.90861e-11	1.34497e-12	4.36575e-09	6.5525e-13	2.85176e-08	1.91026e-16	6.29914e-15	8.8989e-13	9.15415e-13	1.42196e-10	8.18161e-08	2.30116e-13	3.24818e-12	4.77291e-11	4.06944e-13	1.17401e-14	3.68911e-10	7.41847e-13	2.19874e-13	1.42627e-12	6.6033e-09	8.67383e-09	1.11884e-11	4.97025e-12	7.99465e-11	1755.79	0.000227591	0.000454938	0.000415908	5.68256e-05	0.000313338	0.0196172	0.976009	0.00339512	0.0281862	0.448576	5.37271e-06	0.0050425	0.0172002	424.113	0.00105445
6.25748e-13	1.46346e-12	1.41101e-14	1.08527e-15	2.88284e-17	7.91962e-13	3.43124e-14	7.2051e-14	3.45249e-10	2.01661e-11	1.4212e-12	4.03147e-09	6.01041e-13	4.0032e-08	1.91542e-16	6.2193e-15	8.61007e-13	8.22523e-13	1.6689e-10	8.60803e-08	1.99821e-13	3.62331e-12	5.27156e-11	4.08141e-13	1.19663e-14	4.50725e-10	7.5185e-13	2.83111e-13	1.70648e-12	9.98774e-09	9.83272e-09	1.36548e-11	4.88936e-12	8.52867e-11	1858.54	0.00024077	0.000450396	0.000310854	4.75821e-05	0.000486944	0.0843111	1.32268	0.00367791	0.0704051	0.670574	4.66679e-06	0.00515332	0.0153884	317.333	0.000981875
6.25706e-13	1.23326e-12	1.34237e-14	8.67885e-16	2.48613e-17	7.81426e-13	3.23169e-14	8.75763e-14	3.03132e-10	2.01913e-11	1.39294e-12	2.44698e-09	6.25755e-13	3.0306e-08	2.27427e-16	6.10964e-15	8.06111e-13	8.45752e-13	1.93097e-10	9.78122e-08	2.69335e-13	4.67326e-12	4.58309e-11	4.51823e-13	9.59272e-15	3.92928e-10	7.51725e-13	2.37706e-13	1.29679e-12	7.52929e-09	8.38858e-09	1.15623e-11	4.61111e-12	9.3849e-11	1799.99	0.000244907	0.000443876	0.000513895	4.58564e-05	0.000475407	0.0599389	1.34705	0.00356995	0.076822	0.497537	7.04039e-06	0.00434025	0.0180311	505.49	0.00164769
6.25834e-13	1.42946e-12	1.79825e-14	8.55856e-16	2.60187e-17	7.58079e-13	3.35932e-14	7.11626e-14	3.47635e-10	1.97018e-11	1.4103e-12	2.93149e-09	6.18173e-13	3.49754e-08	1.91403e-16	6.66442e-15	7.96201e-13	7.43047e-13	1.29387e-10	7.72644e-08	2.00502e-13	2.9503e-12	4.54686e-11	3.98907e-13	1.19776e-14	3.7331e-10	7.01859e-13	2.63773e-13	1.36936e-12	1.19829e-08	1.0109e-08	1.34884e-11	4.81811e-12	6.3327e-11	2112.34	0.000233756	0.000458032	0.000372216	5.15586e-05	0.000660079	0.0754889	1.18005	0.00504244	0.0435178	0.66296	7.67089e-06	0.00492604	0.0131886	398.767	0.00148325
6.25381e-13	1.4425e-12	1.22138e-14	1.04603e-15	2.26611e-17	7.4529e-13	3.27719e-14	7.01356e-14	3.89221e-10	1.96769e-11	1.42078e-12	3.96141e-09	6.00741e-13	2.74482e-08	1.67636e-16	6.84203e-15	9.26718e-13	8.29807e-13	1.60239e-10	8.3644e-08	1.51149e-13	3.03367e-12	4.96437e-11	4.16839e-13	1.32222e-14	3.63227e-10	7.72043e-13	2.57732e-13	1.59332e-12	1.02062e-08	9.17081e-09	1.16657e-11	4.50636e-12	8.80247e-11	1889.14	0.000212872	0.000442366	0.000414962	4.97343e-05	0.000543786	0.0844196	1.46996	0.00241006	0.0715963	0.715176	5.99901e-06	0.00458221	0.0167196	436.582	0.00145255
8.68735e-13	1.46005e-12	1.43337e-14	9.48354e-16	2.60104e-17	7.32933e-13	5.36836e-14	4.86309e-14	3.14278e-10	1.80145e-11	1.45173e-12	3.62734e-09	4.78887e-13	3.67015e-08	1.40156e-16	5.03897e-15	6.92701e-13	8.06832e-13	1.14651e-10	8.83317e-08	1.57091e-13	2.76674e-12	4.79319e-11	3.77812e-13	1.25175e-14	3.06146e-10	7.1393e-13	2.64303e-13	1.42607e-12	9.6909e-09	9.60745e-09	1.05606e-11	5.4028e-12	9.21044e-11	1956.57	0.000238444	0.000434637	0.000355589	4.80584e-05	0.000494578	0.10242	1.48376	0.00333632	0.0648997	0.776814	7.16976e-06	0.00435645	0.0133236	492.396	0.00146951
6.25708e-13	1.37274e-12	1.11873e-14	9.67807e-16	3.09748e-17	7.12044e-13	5.10999e-14	5.69046e-14	5.95686e-10	2.10524e-11	1.42921e-12	3.83898e-09	5.92873e-13	2.65145e-08	2.23483e-16	7.2209e-15	9.38284e-13	7.40611e-13	2.15354e-10	6.42603e-08	1.25683e-13	2.63345e-12	4.21081e-11	3.85317e-13	1.15971e-14	3.83665e-10	6.92537e-13	2.94699e-13	1.54744e-12	1.31786e-08	9.61629e-09	1.15958e-11	4.96692e-12	1.05717e-10	2894.21	0.000234653	0.000458009	0.000264603	5.56443e-05	0.000382252	0.0657508	1.3504	0.00203962	0.0580113	0.58638	6.26299e-06	0.00411356	0.0154265	543.68	0.00106546
6.25664e-13	1.28773e-12	1.09234e-14	9.10309e-16	2.32169e-17	7.56958e-13	2.88596e-14	6.40955e-14	3.93199e-10	2.19633e-11	1.37658e-12	4.04169e-09	5.20664e-13	3.24269e-08	2.35888e-16	5.51591e-15	8.24218e-13	8.32856e-13	2.4198e-10	7.76201e-08	3.10949e-13	3.15832e-12	4.39007e-11	4.18087e-13	1.31496e-14	4.38899e-10	7.4874e-13	2.51962e-13	1.62982e-12	1.07335e-08	1.14692e-08	1.26185e-11	3.9604e-12	8.83743e-11	2209.98	0.000243337	0.00047259	0.000498524	4.61393e-05	0.000413708	0.0712261	1.50512	0.00344428	0.0579399	0.245414	5.62343e-06	0.00585479	0.0131085	485.851	0.00105604
8.40867e-13	1.2342e-12	1.20046e-14	8.83875e-16	2.38773e-17	8.07022e-13	3.39746e-14	6.81286e-14	3.54077e-10	1.98137e-11	1.42854e-12	3.28775e-09	6.0856e-13	3.35684e-08	1.77231e-16	5.39114e-15	7.68022e-13	8.31062e-13	1.65302e-10	9.95641e-08	1.8443e-13	3.49186e-12	4.70385e-11	4.00452e-13	1.29449e-14	3.52065e-10	7.19395e-13	2.47031e-13	1.34229e-12	8.96021e-09	9.48171e-09	9.92193e-12	5.0122e-12	8.61772e-11	2097.72	0.000226702	0.000463387	0.000492361	5.27566e-05	0.000539598	0.0595239	1.50237	0.00381289	0.0728836	0.831565	6.17471e-06	0.00562943	0.0136886	387.314	0.00155747
6.47345e-13	1.38997e-12	1.09398e-14	8.82567e-16	2.869e-17	8.37656e-13	3.9179e-14	6.9177e-14	4.01087e-10	3.00481e-11	1.40206e-12	3.32434e-09	6.45905e-13	2.19223e-08	2.11465e-16	5.91514e-15	7.02387e-13	7.86227e-13	1.59702e-10	8.18767e-08	2.16675e-13	2.81704e-12	4.51665e-11	4.18763e-13	1.09704e-14	4.39937e-10	6.56417e-13	2.44184e-13	1.32725e-12	9.12195e-09	9.02479e-09	9.38953e-12	4.08995e-12	7.93714e-11	1853.96	0.000237238	0.0004461	0.000467873	4.69056e-05	0.000486475	0.0676731	1.34548	0.0034151	0.0797645	0.391612	7.07327e-06	0.00610801	0.0135724	437.275	0.00178159
8.25678e-13	1.25471e-12	1.33495e-14	1.03938e-15	2.6101e-17	7.79015e-13	2.94209e-14	7.49949e-14	4.08492e-10	2.12362e-11	1.39905e-12	3.34172e-09	6.94939e-13	4.58705e-08	1.39964e-16	5.45847e-15	8.88062e-13	8.3782e-13	1.46167e-10	9.38629e-08	1.68492e-13	3.50665e-12	4.08885e-11	3.84739e-13	8.92598e-15	7.49537e-10	7.05842e-13	2.6346e-13	1.54098e-12	9.14128e-09	8.40784e-09	1.2827e-11	4.21662e-12	9.61915e-11	2057.84	0.000234292	0.000422541	0.000365947	4.21214e-05	0.000625789	0.0747588	1.62338	0.00341398	0.0834955	0.503532	6.01295e-06	0.00615242	0.0136328	382.598	0.00123964
8.98523e-13	1.08724e-12	1.3218e-14	9.31027e-16	2.33454e-17	8.43462e-13	4.67681e-14	6.36977e-14	4.14067e-10	1.99595e-11	1.40824e-12	4.57766e-09	7.83869e-13	2.49829e-08	2.10565e-16	6.46526e-15	7.08845e-13	8.15003e-13	1.599e-10	6.74223e-08	2.47079e-13	3.24899e-12	4.31649e-11	3.77434e-13	1.35514e-14	4.15174e-10	6.45185e-13	2.60384e-13	1.49993e-12	9.16151e-09	8.62286e-09	1.31724e-11	5.18878e-12	1.29752e-10	1449.08	0.000247028	0.000452479	0.000427136	4.56433e-05	0.000677452	0.0444474	1.66189	0.00374576	0.0817043	0.637192	6.78406e-06	0.00883385	0.00963119	488.812	0.00141226
7.40419e-13	1.41023e-12	1.40144e-14	9.32642e-16	2.17981e-17	8.36619e-13	4.20983e-14	7.02231e-14	3.71537e-10	2.39455e-11	1.40072e-12	3.76323e-09	5.24269e-13	2.46758e-08	1.69032e-16	6.43023e-15	5.79441e-13	7.781e-13	2.00805e-10	9.65689e-08	2.84033e-13	2.86718e-12	4.12255e-11	4.03819e-13	1.3742e-14	3.47541e-10	6.36403e-13	2.29444e-13	1.29008e-12	7.17607e-09	9.8708e-09	9.04488e-12	3.89992e-12	1.13739e-10	2620.07	0.00023822	0.000469273	0.000340339	4.44298e-05	0.00044038	0.0791418	1.2904	0.00273734	0.0755212	0.72727	6.37275e-06	0.00649212	0.0157798	377.358	0.00160905
6.25803e-13	1.37837e-12	1.06938e-14	1.05302e-15	2.46628e-17	7.42527e-13	2.53623e-14	5.7481e-14	3.91072e-10	2.44009e-11	1.38264e-12	3.81112e-09	3.7214e-13	2.80885e-08	1.72541e-16	5.01508e-15	8.17747e-13	8.35044e-13	1.51046e-10	9.56888e-08	3.55452e-13	2.52101e-12	4.96645e-11	4.34602e-13	1.23741e-14	2.59197e-10	6.72837e-13	2.12281e-13	1.47186e-12	7.95712e-09	8.37267e-09	1.18368e-11	4.63157e-12	8.70476e-11	2082.52	0.000238703	0.000511561	0.000354301	4.54094e-05	0.000633175	0.0886448	1.6651	0.00358358	0.0730749	0.50264	7.50331e-06	0.00581161	0.0142075	435.115	0.00136297
6.85664e-13	1.26832e-12	1.17684e-14	9.42498e-16	2.61006e-17	7.18833e-13	4.48894e-14	8.44021e-14	3.56927e-10	2.14442e-11	1.37414e-12	3.56833e-09	5.70339e-13	2.32417e-08	1.4683e-16	6.16005e-15	7.13086e-13	7.3786e-13	1.70876e-10	9.2157e-08	2.17881e-13	3.58323e-12	4.50364e-11	4.01318e-13	1.10238e-14	4.05891e-10	7.31696e-13	2.51956e-13	1.62377e-12	1.0011e-08	9.01183e-09	1.05306e-11	4.76769e-12	1.08503e-10	2250.55	0.000229286	0.000439028	0.000351003	5.23408e-05	0.000473006	0.0778166	1.70529	0.00360464	0.0898006	0.602789	5.49965e-06	0.00589969	0.015612	528.36	0.00120427
6.40732e-13	1.40845e-12	1.05118e-14	7.63977e-16	2.02379e-17	7.73738e-13	4.5652e-14	7.53056e-14	3.54675e-10	2.14137e-11	1.43269e-12	4.20265e-09	6.07003e-13	3.71249e-08	1.62389e-16	6.56303e-15	6.19101e-13	8.58221e-13	1.61226e-10	8.68849e-08	1.85478e-13	3.69062e-12	4.70974e-11	3.92862e-13	1.07583e-14	4.44206e-10	7.13482e-13	2.7709e-13	1.50995e-12	6.90394e-09	8.65883e-09	1.24381e-11	4.4414e-12	8.90908e-11	1430.96	0.000244064	0.000454586	0.000377963	6.57695e-05	0.000537117	0.0849687	1.35853	0.00247135	0.0852976	0.672364	6.34198e-06	0.00572583	0.0128629	445.916	0.00146022
6.24808e-13	1.48563e-12	1.11662e-14	1.05116e-15	3.17755e-17	7.99537e-13	2.76157e-14	7.82917e-14	3.50699e-10	2.21003e-11	1.39987e-12	4.52553e-09	5.8317e-13	3.17107e-08	1.45721e-16	6.91721e-15	9.16295e-13	7.69277e-13	1.24967e-10	7.68505e-08	1.41077e-13	3.07461e-12	4.40311e-11	4.18433e-13	1.3139e-14	4.08556e-10	7.35135e-13	2.33615e-13	1.54429e-12	9.69371e-09	8.3761e-09	1.29396e-11	4.7295e-12	9.45279e-11	1923.4	0.000214169	0.000412066	0.000420823	4.55727e-05	0.000529894	0.105967	1.41958	0.00310601	0.097314	0.682961	5.97515e-06	0.00622313	0.0121723	428.726	0.00159034
6.25655e-13	1.27728e-12	1.41159e-14	1.10929e-15	3.49009e-17	7.75638e-13	2.44483e-14	4.64033e-14	5.68952e-10	1.82588e-11	1.41011e-12	4.23242e-09	5.57518e-13	2.79658e-08	1.0595e-16	5.73699e-15	6.49834e-13	8.03221e-13	1.61927e-10	8.70534e-08	2.43455e-13	2.83812e-12	4.60479e-11	3.7599e-13	1.12147e-14	3.57936e-10	6.46217e-13	2.51314e-13	1.71337e-12	6.58422e-09	1.13765e-08	1.28425e-11	5.29619e-12	9.25295e-11	2079.13	0.000221238	0.000430172	0.000481228	3.79516e-05	0.000627183	0.074701	1.64732	0.0027813	0.0699852	0.258413	8.91997e-06	0.00543295	0.0129837	340.917	0.000979311
1.01163e-12	1.31294e-12	1.13168e-14	9.01873e-16	2.35235e-17	7.02373e-13	3.51641e-14	8.30174e-14	3.53166e-10	1.89576e-11	1.45513e-12	2.82645e-09	6.41999e-13	2.50066e-08	1.27689e-16	6.31965e-15	5.98241e-13	8.15281e-13	1.87253e-10	8.80871e-08	2.05294e-13	3.56756e-12	4.82837e-11	4.0732e-13	1.13896e-14	4.20191e-10	6.93651e-13	3.17781e-13	1.5691e-12	1.00547e-08	1.10771e-08	1.11235e-11	4.89431e-12	8.49875e-11	2006.22	0.000249528	0.000472371	0.000429308	5.98532e-05	0.000410905	0.0829283	1.64929	0.00350914	0.067742	0.491589	6.66316e-06	0.00617207	0.0148381	308.994	0.0015324
1.16104e-12	1.32885e-12	1.09489e-14	1.11514e-15	2.19337e-17	8.23209e-13	3.93399e-14	6.6652e-14	2.98057e-10	2.78329e-11	1.39341e-12	4.71596e-09	6.53497e-13	2.64364e-08	1.90563e-16	7.55149e-15	6.20667e-13	8.95775e-13	2.14936e-10	9.27234e-08	2.13963e-13	2.98717e-12	5.21919e-11	4.60531e-13	1.29573e-14	3.24655e-10	7.64369e-13	2.11554e-13	1.22523e-12	1.03546e-08	1.10374e-08	1.38228e-11	5.18318e-12	8.60143e-11	1674.16	0.000252732	0.000443945	0.000362277	4.33111e-05	0.000519679	0.0760072	1.58267	0.00422821	0.0836731	0.878521	8.32366e-06	0.00537947	0.0109244	431.132	0.00165842
8.06403e-13	1.32841e-12	1.3332e-14	9.72495e-16	2.41145e-17	7.35869e-13	3.24893e-14	8.13669e-14	3.78204e-10	2.10778e-11	1.36727e-12	4.43133e-09	6.02368e-13	3.03463e-08	1.45598e-16	5.68298e-15	6.35922e-13	8.94982e-13	1.68588e-10	7.95411e-08	2.49173e-13	3.08752e-12	4.19458e-11	4.21053e-13	1.56617e-14	4.46744e-10	7.08524e-13	2.6309e-13	1.38817e-12	8.35384e-09	1.00273e-08	1.31853e-11	4.60087e-12	8.50493e-11	2155.76	0.000236888	0.000461353	0.000421351	5.14544e-05	0.000469239	0.0844222	1.57871	0.00320041	0.0595907	0.317549	5.77712e-06	0.00655706	0.0128979	246.935	0.00109965
6.25755e-13	1.32897e-12	1.27596e-14	1.09577e-15	1.84834e-17	7.4565e-13	3.72856e-14	6.46687e-14	4.35924e-10	2.14476e-11	1.42266e-12	4.91981e-09	6.96411e-13	3.41572e-08	2.06856e-16	6.29675e-15	6.46188e-13	8.65256e-13	1.62327e-10	8.60982e-08	3.00973e-13	2.98709e-12	3.85399e-11	4.38539e-13	1.33013e-14	4.74713e-10	6.94507e-13	2.8224e-13	1.43709e-12	1.5091e-08	8.05553e-09	1.32643e-11	5.2099e-12	8.49653e-11	2631.66	0.000255758	0.000468507	0.000572224	6.79027e-05	0.000623027	0.0856914	1.57772	0.00272317	0.0742592	0.615551	6.51015e-06	0.00466836	0.0154068	482.683	0.00115749
6.25705e-13	1.4823e-12	1.15933e-14	7.46593e-16	3.83675e-17	7.93592e-13	3.94822e-14	8.29678e-14	4.67578e-10	2.56112e-11	1.34092e-12	4.0932e-09	5.939e-13	3.33459e-08	1.46865e-16	6.6326e-15	1.44481e-12	8.12041e-13	1.65259e-10	8.57732e-08	1.65198e-13	3.91527e-12	4.14787e-11	4.12616e-13	1.02522e-14	2.36366e-10	7.58193e-13	2.31175e-13	1.38363e-12	8.88127e-09	8.7416e-09	1.2285e-11	4.98086e-12	6.95004e-11	2198.37	0.000255028	0.000456535	0.000412272	4.88338e-05	0.000456707	0.0919233	1.39659	0.00430401	0.07731	0.442398	8.09621e-06	0.00456117	0.0195178	350.676	0.00130889
6.25765e-13	1.74754e-12	1.073e-14	8.8999e-16	2.15166e-17	7.89328e-13	3.81419e-14	5.40557e-14	8.27271e-10	2.31689e-11	1.4099e-12	3.82154e-09	5.4089e-13	3.35138e-08	1.88351e-16	6.04561e-15	9.08604e-13	8.14354e-13	2.30279e-10	8.04763e-08	1.73436e-13	3.16043e-12	4.31919e-11	4.0286e-13	1.17205e-14	4.4919e-10	7.27135e-13	2.56967e-13	1.47237e-12	4.89464e-09	8.44165e-09	1.33745e-11	6.15334e-12	8.06606e-11	2959.32	0.000240139	0.000449213	0.000407519	4.29761e-05	0.000501491	0.0619679	0.813062	0.00289303	0.0733054	0.622853	7.09644e-06	0.00612738	0.0137186	412.79	0.00090445
9.14184e-13	1.29211e-12	1.22047e-14	9.20244e-16	2.67981e-17	8.25365e-13	2.77426e-14	7.37893e-14	4.353e-10	2.24545e-11	1.45758e-12	4.06012e-09	6.25237e-13	3.53661e-08	2.34809e-16	6.78488e-15	7.3905e-13	8.08053e-13	1.4873e-10	8.21625e-08	2.43735e-13	2.88945e-12	4.12005e-11	3.91864e-13	1.37495e-14	6.16939e-10	6.67943e-13	2.88082e-13	1.50127e-12	9.14226e-09	8.32155e-09	1.30048e-11	4.40189e-12	9.94058e-11	1855.38	0.000231043	0.000427525	0.000347911	3.29457e-05	0.000563638	0.0705505	1.55614	0.0028054	0.0850737	0.538372	6.6577e-06	0.00904566	0.0151933	451.448	0.00167181
6.25776e-13	1.43495e-12	1.13237e-14	8.65964e-16	2.00758e-17	8.35992e-13	2.63339e-14	7.66461e-14	3.45134e-10	2.05273e-11	1.39898e-12	2.62504e-09	5.48067e-13	3.68102e-08	1.76751e-16	5.59966e-15	8.57003e-13	9.49618e-13	1.80901e-10	9.01297e-08	2.47627e-13	2.86015e-12	5.32961e-11	4.53489e-13	1.21742e-14	3.6978e-10	7.69556e-13	2.43811e-13	1.35565e-12	7.26905e-09	1.10183e-08	1.03692e-11	4.38621e-12	7.80112e-11	1821.35	0.000233615	0.000447249	0.000438443	4.07312e-05	0.000484373	0.102138	1.51042	0.00320762	0.0814256	0.59635	6.61959e-06	0.00663325	0.0117122	361.153	0.00128022
6.25739e-13	1.48575e-12	1.35566e-14	1.1658e-15	2.85804e-17	7.21645e-13	3.62845e-14	4.25927e-14	4.29244e-10	2.40052e-11	1.40842e-12	2.78642e-09	8.07357e-13	3.10479e-08	1.99531e-16	5.60874e-15	7.1325e-13	7.86765e-13	2.14372e-10	8.92917e-08	2.6565e-13	4.70492e-12	4.34407e-11	3.90376e-13	1.30823e-14	3.93299e-10	7.01204e-13	2.47941e-13	1.54382e-12	8.0166e-09	9.77139e-09	1.35595e-11	5.86432e-12	7.28433e-11	2050.51	0.000238634	0.000455531	0.000419371	7.08858e-05	0.000481196	0.0940809	1.28284	0.00248606	0.0693975	0.325025	6.35672e-06	0.00477351	0.0149767	357.689	0.00120726
6.25733e-13	1.16082e-12	1.11856e-14	1.23236e-15	2.5362e-17	7.62004e-13	2.78542e-14	5.21287e-14	3.43468e-10	1.98423e-11	1.38718e-12	3.47601e-09	4.44032e-13	4.64088e-08	1.7866e-16	5.49017e-15	7.9891e-13	8.4033e-13	1.98041e-10	9.99935e-08	2.31135e-13	2.78945e-12	4.22896e-11	4.19331e-13	1.71747e-14	4.99451e-10	6.94593e-13	2.31928e-13	1.29082e-12	8.20069e-09	8.85602e-09	1.2308e-11	4.23149e-12	9.13991e-11	2209.68	0.000241054	0.000444795	0.000325514	4.60953e-05	0.000605355	0.0657131	1.94837	0.00451234	0.0742542	0.265711	8.46929e-06	0.00593274	0.0124905	434.588	0.00110873
6.257e-13	1.45144e-12	1.1352e-14	6.96915e-16	3.36638e-17	8.65438e-13	3.66998e-14	7.21161e-14	3.23224e-10	2.48401e-11	1.4168e-12	6.38815e-09	7.45471e-13	3.25078e-08	1.96459e-16	6.16482e-15	9.02982e-13	8.80911e-13	1.80499e-10	9.66872e-08	2.02445e-13	2.7943e-12	4.71276e-11	4.71513e-13	1.28114e-14	4.3157e-10	7.86951e-13	2.80343e-13	1.5182e-12	1.43564e-08	1.08008e-08	1.40959e-11	4.74241e-12	8.60127e-11	1657.67	0.000224158	0.000434421	0.000428704	5.46428e-05	0.000203966	0.0791356	1.43718	0.00260218	0.078873	0.65857	6.14586e-06	0.0071632	0.0140517	431.635	0.000996212
6.25778e-13	1.42188e-12	1.38093e-14	1.03621e-15	1.9972e-17	7.70085e-13	3.26696e-14	6.59e-14	3.28565e-10	2.3493e-11	1.35941e-12	3.96517e-09	5.43826e-13	3.41593e-08	1.54093e-16	6.36929e-15	8.93866e-13	7.9954e-13	1.52892e-10	8.41568e-08	2.4701e-13	2.93114e-12	4.0315e-11	4.04151e-13	1.1736e-14	4.51059e-10	6.71254e-13	2.27435e-13	1.54598e-12	1.12764e-08	9.06703e-09	1.47775e-11	4.66723e-12	6.97128e-11	1793.84	0.000240888	0.000444276	0.000391528	3.58485e-05	0.000687929	0.07739	1.15191	0.00295596	0.0762725	0.452373	6.55957e-06	0.00562164	0.0183791	383.362	0.00111062
6.59959e-13	1.47674e-12	1.06037e-14	1.13767e-15	2.52961e-17	6.88286e-13	4.5916e-14	8.27126e-14	3.78277e-10	2.34728e-11	1.40757e-12	3.54151e-09	5.12456e-13	3.07558e-08	1.50315e-16	6.53749e-15	6.73936e-13	8.37729e-13	1.6556e-10	8.45258e-08	2.16994e-13	2.87156e-12	4.10167e-11	3.88299e-13	1.36122e-14	3.55227e-10	7.03654e-13	2.73556e-13	1.68441e-12	6.20383e-09	9.70404e-09	1.16468e-11	5.42128e-12	8.35471e-11	2329.03	0.000247279	0.000468569	0.000520388	4.5959e-05	0.000547222	0.0991903	1.54763	0.00320398	0.0773055	0.636712	5.69251e-06	0.00502874	0.0138974	458.438	0.00155687
6.25699e-13	1.36691e-12	1.15891e-14	1.2601e-15	2.66322e-17	7.3727e-13	3.7253e-14	5.32871e-14	3.96169e-10	1.56256e-11	1.39036e-12	3.19239e-09	5.80317e-13	2.81606e-08	1.61081e-16	6.65527e-15	8.13131e-13	8.62158e-13	1.57499e-10	8.9965e-08	2.37764e-13	2.50618e-12	4.40225e-11	4.42165e-13	1.25065e-14	3.57485e-10	7.30944e-13	2.38342e-13	1.49809e-12	1.09701e-08	1.09197e-08	1.15178e-11	5.06081e-12	8.46014e-11	2138.09	0.000227644	0.000422059	0.000524127	8.42916e-05	0.000445959	0.0846102	1.65576	0.0027339	0.0874536	0.364628	5.6374e-06	0.00449205	0.0175074	390.607	0.00118854
6.25768e-13	1.34707e-12	1.19783e-14	8.06737e-16	2.48416e-17	7.42074e-13	4.69228e-14	7.04835e-14	3.99903e-10	2.25862e-11	1.38062e-12	5.79924e-09	6.0547e-13	3.80552e-08	1.50286e-16	6.22896e-15	6.46667e-13	7.84556e-13	1.65795e-10	9.91367e-08	2.33983e-13	3.56446e-12	4.76033e-11	3.8329e-13	1.17923e-14	4.28008e-10	6.87409e-13	2.51121e-13	1.42712e-12	8.64053e-09	9.28607e-09	1.38218e-11	5.01562e-12	8.04539e-11	1689.66	0.00022977	0.000452197	0.000313162	4.84097e-05	0.000350984	0.0813532	1.53268	0.00328278	0.0684473	0.659013	8.89492e-06	0.00525382	0.0134788	447.376	0.000980013
6.25808e-13	1.2869e-12	1.24781e-14	8.92181e-16	2.62724e-17	7.27313e-13	3.12397e-14	7.58644e-14	3.82231e-10	2.43807e-11	1.42697e-12	2.98275e-09	4.98286e-13	3.02425e-08	1.43599e-16	5.35367e-15	8.08425e-13	7.85075e-13	1.65862e-10	7.29392e-08	2.03009e-13	3.09964e-12	4.35159e-11	3.74279e-13	1.22759e-14	3.25172e-10	6.99428e-13	2.70601e-13	1.5762e-12	1.06429e-08	9.1576e-09	9.77658e-12	4.78289e-12	8.30581e-11	1941.92	0.000243399	0.000428862	0.000506032	4.24742e-05	0.000516865	0.0787013	1.74571	0.00307083	0.0802978	0.646102	6.33715e-06	0.00551422	0.0155599	388.43	0.00140449
6.25584e-13	1.35557e-12	1.13731e-14	9.74268e-16	2.50149e-17	7.64096e-13	3.62262e-14	5.79413e-14	3.49062e-10	2.25171e-11	1.41584e-12	3.84472e-09	5.82921e-13	2.2402e-08	1.54327e-16	5.56265e-15	7.78775e-13	8.28946e-13	1.42877e-10	8.65508e-08	1.87533e-13	3.06597e-12	4.62703e-11	3.79464e-13	1.22381e-14	5.29784e-10	6.98739e-13	2.60251e-13	1.40127e-12	9.28874e-09	9.63631e-09	1.15571e-11	4.03924e-12	8.54885e-11	2297.42	0.000250967	0.000445084	0.000381638	4.86937e-05	0.000525137	0.0640777	1.21502	0.00306344	0.081598	0.585655	5.77754e-06	0.00543716	0.0146364	244.603	0.0011856
6.25766e-13	1.24429e-12	1.17959e-14	8.19048e-16	2.08076e-17	8.37202e-13	3.64198e-14	6.8416e-14	3.59233e-10	2.24456e-11	1.39881e-12	6.32691e-09	5.65746e-13	3.44905e-08	1.76249e-16	5.7359e-15	4.96311e-13	8.08857e-13	1.63134e-10	9.23416e-08	2.46929e-13	3.09454e-12	4.72094e-11	3.51444e-13	1.34668e-14	3.55906e-10	6.86366e-13	2.49492e-13	1.36521e-12	7.59041e-09	9.82365e-09	1.40525e-11	4.9092e-12	7.85113e-11	2481.24	0.000271593	0.000465889	0.000391024	4.48011e-05	0.000593325	0.0680453	1.55488	0.00269539	0.0601351	0.399839	6.09528e-06	0.00581459	0.0121394	496.151	0.00155009
6.25726e-13	1.35955e-12	1.27997e-14	8.96292e-16	2.22705e-17	7.03605e-13	3.75694e-14	7.41754e-14	3.52078e-10	2.38762e-11	1.38726e-12	3.98416e-09	6.54415e-13	3.52686e-08	1.76414e-16	7.29839e-15	6.94933e-13	8.39966e-13	1.60635e-10	9.93757e-08	2.07396e-13	3.43369e-12	4.8157e-11	4.12289e-13	1.2813e-14	3.39718e-10	7.00746e-13	2.67572e-13	1.52982e-12	8.9895e-09	8.92409e-09	1.1536e-11	4.98816e-12	9.11586e-11	2015.28	0.000244422	0.000470508	0.0004903	4.57995e-05	0.000535816	0.0810327	1.4805	0.00320637	0.076593	0.488093	6.87229e-06	0.00489021	0.0156773	389.638	0.00113473
6.25647e-13	1.34048e-12	1.13778e-14	9.98149e-16	2.70427e-17	7.34571e-13	3.72776e-14	4.61805e-14	4.00213e-10	2.36475e-11	1.38087e-12	3.19268e-09	6.30033e-13	3.20256e-08	2.00768e-16	6.59615e-15	5.99789e-13	8.61117e-13	1.73792e-10	8.0949e-08	2.16112e-13	3.20647e-12	4.92559e-11	4.27477e-13	1.27891e-14	3.76246e-10	6.95055e-13	2.26601e-13	1.3082e-12	8.14618e-09	9.91778e-09	1.21672e-11	5.25607e-12	8.6432e-11	1794.29	0.000228015	0.000432788	0.000423299	4.74464e-05	0.000692817	0.0819606	1.5173	0.00390441	0.0679703	0.482649	6.51977e-06	0.00461596	0.0179274	313.098	0.00103225
6.25732e-13	1.45376e-12	1.36023e-14	9.30954e-16	2.85942e-17	7.10294e-13	3.31529e-14	7.70051e-14	4.43338e-10	2.21012e-11	1.37279e-12	3.49919e-09	7.0747e-13	3.90037e-08	1.85375e-16	6.25201e-15	7.10912e-13	7.77014e-13	2.40055e-10	9.11274e-08	1.65388e-13	3.96648e-12	5.01925e-11	4.00638e-13	1.18584e-14	4.45493e-10	7.31352e-13	2.49329e-13	1.32965e-12	1.00539e-08	8.02631e-09	1.23367e-11	5.14049e-12	8.70348e-11	2271.22	0.000247125	0.000462834	0.000433402	4.18467e-05	0.000708362	0.100647	1.54281	0.00368847	0.0650965	0.649521	6.09412e-06	0.00492642	0.0180998	482.163	0.00101725
6.2535e-13	1.28639e-12	1.06185e-14	9.85747e-16	2.44309e-17	7.87833e-13	3.44882e-14	7.49541e-14	3.34341e-10	2.16732e-11	1.44216e-12	3.78577e-09	5.81578e-13	3.09551e-08	1.79304e-16	6.47012e-15	7.61377e-13	7.895e-13	1.48453e-10	8.45337e-08	1.96964e-13	2.90261e-12	4.52437e-11	4.33996e-13	1.19224e-14	4.32142e-10	7.05027e-13	2.84007e-13	1.55089e-12	9.53713e-09	9.44486e-09	1.23099e-11	4.68921e-12	8.5849e-11	1921.67	0.000235446	0.000430788	0.000424853	4.69669e-05	0.000500702	0.0797104	1.55461	0.00338993	0.0723357	0.700818	6.63363e-06	0.00566852	0.015532	416.501	0.00164182
6.2535e-13	1.28639e-12	1.06185e-14	9.85747e-16	2.44309e-17	7.87833e-13	3.44882e-14	7.49541e-14	3.34341e-10	2.16732e-11	1.44216e-12	3.78577e-09	5.81578e-13	3.09551e-08	1.79304e-16	6.47012e-15	7.61377e-13	7.895e-13	1.48453e-10	8.45337e-08	1.96964e-13	2.90261e-12	4.52437e-11	4.33996e-13	1.19224e-14	4.32142e-10	7.05027e-13	2.84007e-13	1.55089e-12	9.53713e-09	9.44486e-09	1.23099e-11	4.68921e-12	8.5849e-11	1921.67	0.000235446	0.000430788	0.000424853	4.69669e-05	0.000500702	0.0797104	1.55461	0.00338993	0.0723357	0.700818	6.63363e-06	0.00566852	0.015532	416.501	0.00164182
6.2535e-13	1.28639e-12	1.06185e-14	9.85747e-16	2.44309e-17	7.87833e-13	3.44882e-14	7.49541e-14	3.34341e-10	2.16732e-11	1.44216e-12	3.78577e-09	5.81578e-13	3.09551e-08	1.79304e-16	6.47012e-15	7.61377e-13	7.895e-13	1.48453e-10	8.45337e-08	1.96964e-13	2.90261e-12	4.52437e-11	4.33996e-13	1.19224e-14	4.32142e-10	7.05027e-13	2.84007e-13	1.55089e-12	9.53713e-09	9.44486e-09	1.23099e-11	4.68921e-12	8.5849e-11	1921.67	0.000235446	0.000430788	0.000424853	4.69669e-05	0.000500702	0.0797104	1.55461	0.00338993	0.0723357	0.700818	6.63363e-06	0.00566852	0.015532	416.501	0.00164182
6.2535e-13	1.28639e-12	1.06185e-14	9.85747e-16	2.44309e-17	7.87833e-13	3.44882e-14	7.49541e-14	3.34341e-10	2.16732e-11	1.44216e-12	3.78577e-09	5.81578e-13	3.09551e-08	1.79304e-16	6.47012e-15	7.61377e-13	7.895e-13	1.48453e-10	8.45337e-08	1.96964e-13	2.90261e-12	4.52437e-11	4.33996e-13	1.19224e-14	4.32142e-10	7.05027e-13	2.84007e-13	1.55089e-12	9.53713e-09	9.44486e-09	1.23099e-11	4.68921e-12	8.5849e-11	1921.67	0.000235446	0.000430788	0.000424853	4.69669e-05	0.000500702	0.0797104	1.55461	0.00338993	0.0723357	0.700818	6.63363e-06	0.00566852	0.015532	416.501	0.00164182
6.2535e-13	1.28639e-12	1.06185e-14	9.85747e-16	2.44309e-17	7.87833e-13	3.44882e-14	7.49541e-14	3.34341e-10	2.16732e-11	1.44216e-12	3.78577e-09	5.81578e-13	3.09551e-08	1.79304e-16	6.47012e-15	7.61377e-13	7.895e-13	1.48453e-10	8.45337e-08	1.96964e-13	2.90261e-12	4.52437e-11	4.33996e-13	1.19224e-14	4.32142e-10	7.05027e-13	2.84007e-13	1.55089e-12	9.53713e-09	9.44486e-09	1.23099e-11	4.68921e-12	8.5849e-11	1921.67	0.000235446	0.000430788	0.000424853	4.69669e-05	0.000500702	0.0797104	1.55461	0.00338993	0.0723357	0.700818	6.63363e-06	0.00566852	0.015532	416.501	0.00164182
6.2535e-13	1.28639e-12	1.06185e-14	9.85747e-16	2.44309e-17	7.87833e-13	3.44882e-14	7.49541e-14	3.34341e-10	2.16732e-11	1.44216e-12	3.78577e-09	5.81578e-13	3.09551e-08	1.79304e-16	6.47012e-15	7.61377e-13	7.895e-13	1.48453e-10	8.45337e-08	1.96964e-13	2.90261e-12	4.52437e-11	4.33996e-13	1.19224e-14	4.32142e-10	7.05027e-13	2.84007e-13	1.55089e-12	9.53713e-09	9.44486e-09	1.23099e-11	4.68921e-12	8.5849e-11	1921.67	0.000235446	0.000430788	0.000424853	4.69669e-05	0.000500702	0.0797104	1.55461	0.00338993	0.0723357	0.700818	6.63363e-06	0.00566852	0.015532	416.501	0.00164182
6.25869e-13	1.05534e-12	1.48695e-14	9.63714e-16	2.10831e-17	7.50669e-13	4.79838e-14	9.11453e-14	2.14018e-10	2.23659e-11	1.34606e-12	4.24972e-09	6.27515e-13	1.04515e-08	1.20063e-16	6.4892e-15	3.84694e-13	7.24956e-13	1.82811e-10	4.99619e-08	2.79131e-13	3.04849e-12	6.33015e-11	4.01174e-13	1.44659e-14	3.21271e-10	6.22045e-13	1.87416e-13	1.30709e-12	6.43735e-09	7.63011e-09	1.43846e-11	6.33396e-12	8.99108e-11	2254.91	0.000225913	0.000424692	0.000526298	2.88639e-05	0.000349906	0.0549036	2.03134	0.00335295	0.0778763	1.19467	3.59149e-06	0.00517552	0.00757505	1152.9	0.00182431
6.2535e-13	1.28639e-12	1.06185e-14	9.85747e-16	2.44309e-17	7.87833e-13	3.44882e-14	7.49541e-14	3.34341e-10	2.16732e-11	1.44216e-12	3.78577e-09	5.81578e-13	3.09551e-08	1.79304e-16	6.47012e-15	7.61377e-13	7.895e-13	1.48453e-10	8.45337e-08	1.96964e-13	2.90261e-12	4.52437e-11	4.33996e-13	1.19224e-14	4.32142e-10	7.05027e-13	2.84007e-13	1.55089e-12	9.53713e-09	9.44486e-09	1.23099e-11	4.68921e-12	8.5849e-11	1921.67	0.000235446	0.000430788	0.000424853	4.69669e-05	0.000500702	0.0797104	1.55461	0.00338993	0.0723357	0.700818	6.63363e-06	0.00566852	0.015532	416.501	0.00164182
6.2535e-13	1.28639e-12	1.06185e-14	9.85747e-16	2.44309e-17	7.87833e-13	3.44882e-14	7.49541e-14	3.34341e-10	2.16732e-11	1.44216e-12	3.78577e-09	5.81578e-13	3.09551e-08	1.79304e-16	6.47012e-15	7.61377e-13	7.895e-13	1.48453e-10	8.45337e-08	1.96964e-13	2.90261e-12	4.52437e-11	4.33996e-13	1.19224e-14	4.32142e-10	7.05027e-13	2.84007e-13	1.55089e-12	9.53713e-09	9.44486e-09	1.23099e-11	4.68921e-12	8.5849e-11	1921.67	0.000235446	0.000430788	0.000424853	4.69669e-05	0.000500702	0.0797104	1.55461	0.00338993	0.0723357	0.700818	6.63363e-06	0.00566852	0.015532	416.501	0.00164182
6.2535e-13	1.28639e-12	1.06185e-14	9.85747e-16	2.44309e-17	7.87833e-13	3.44882e-14	7.49541e-14	3.34341e-10	2.16732e-11	1.44216e-12	3.78577e-09	5.81578e-13	3.09551e-08	1.79304e-16	6.47012e-15	7.61377e-13	7.895e-13	1.48453e-10	8.45337e-08	1.96964e-13	2.90261e-12	4.52437e-11	4.33996e-13	1.19224e-14	4.32142e-10	7.05027e-13	2.84007e-13	1.55089e-12	9.53713e-09	9.44486e-09	1.23099e-11	4.68921e-12	8.5849e-11	1921.67	0.000235446	0.000430788	0.000424853	4.69669e-05	0.000500702	0.0797104	1.55461	0.00338993	0.0723357	0.700818	6.63363e-06	0.00566852	0.015532	416.501	0.00164182
6.2535e-13	1.28639e-12	1.06185e-14	9.85747e-16	2.44309e-17	7.87833e-13	3.44882e-14	7.49541e-14	3.34341e-10	2.16732e-11	1.44216e-12	3.78577e-09	5.81578e-13	3.09551e-08	1.79304e-16	6.47012e-15	7.61377e-13	7.895e-13	1.48453e-10	8.45337e-08	1.96964e-13	2.90261e-12	4.52437e-11	4.33996e-13	1.19224e-14	4.32142e-10	7.05027e-13	2.84007e-13	1.55089e-12	9.53713e-09	9.44486e-09	1.23099e-11	4.68921e-12	8.5849e-11	1921.67	0.000235446	0.000430788	0.000424853	4.69669e-05	0.000500702	0.0797104	1.55461	0.00338993	0.0723357	0.700818	6.63363e-06	0.00566852	0.015532	416.501	0.00164182
6.2535e-13	1.28639e-12	1.06185e-14	9.85747e-16	2.44309e-17	7.87833e-13	3.44882e-14	7.49541e-14	3.34341e-10	2.16732e-11	1.44216e-12	3.78577e-09	5.81578e-13	3.09551e-08	1.79304e-16	6.47012e-15	7.61377e-13	7.895e-13	1.48453e-10	8.45337e-08	1.96964e-13	2.90261e-12	4.52437e-11	4.33996e-13	1.19224e-14	4.32142e-10	7.05027e-13	2.84007e-13	1.55089e-12	9.53713e-09	9.44486e-09	1.23099e-11	4.68921e-12	8.5849e-11	1921.67	0.000235446	0.000430788	0.000424853	4.69669e-05	0.000500702	0.0797104	1.55461	0.00338993	0.0723357	0.700818	6.63363e-06	0.00566852	0.015532	416.501	0.00164182
6.2535e-13	1.28639e-12	1.06185e-14	9.85747e-16	2.44309e-17	7.87833e-13	3.44882e-14	7.49541e-14	3.34341e-10	2.16732e-11	1.44216e-12	3.78577e-09	5.81578e-13	3.09551e-08	1.79304e-16	6.47012e-15	7.61377e-13	7.895e-13	1.48453e-10	8.45337e-08	1.96964e-13	2.90261e-12	4.52437e-11	4.33996e-13	1.19224e-14	4.32142e-10	7.05027e-13	2.84007e-13	1.55089e-12	9.53713e-09	9.44486e-09	1.23099e-11	4.68921e-12	8.5849e-11	1921.67	0.000235446	0.000430788	0.000424853	4.69669e-05	0.000500702	0.0797104	1.55461	0.00338993	0.0723357	0.700818	6.63363e-06	0.00566852	0.015532	416.501	0.00164182
6.2535e-13	1.28639e-12	1.06185e-14	9.85747e-16	2.44309e-17	7.87833e-13	3.44882e-14	7.49541e-14	3.34341e-10	2.16732e-11	1.44216e-12	3.78577e-09	5.81578e-13	3.09551e-08	1.79304e-16	6.47012e-15	7.61377e-13	7.895e-13	1.48453e-10	8.45337e-08	1.96964e-13	2.90261e-12	4.52437e-11	4.33996e-13	1.19224e-14	4.32142e-10	7.05027e-13	2.84007e-13	1.55089e-12	9.53713e-09	9.44486e-09	1.23099e-11	4.68921e-12	8.5849e-11	1921.67	0.000235446	0.000430788	0.000424853	4.69669e-05	0.000500702	0.0797104	1.55461	0.00338993	0.0723357	0.700818	6.63363e-06	0.00566852	0.015532	416.501	0.00164182
6.2535e-13	1.28639e-12	1.06185e-14	9.85747e-16	2.44309e-17	7.87833e-13	3.44882e-14	7.49541e-14	3.34341e-10	2.16732e-11	1.44216e-12	3.78577e-09	5.81578e-13	3.09551e-08	1.79304e-16	6.47012e-15	7.61377e-13	7.895e-13	1.48453e-10	8.45337e-08	1.96964e-13	2.90261e-12	4.52437e-11	4.33996e-13	1.19224e-14	4.32142e-10	7.05027e-13	2.84007e-13	1.55089e-12	9.53713e-09	9.44486e-09	1.23099e-11	4.68921e-12	8.5849e-11	1921.67	0.000235446	0.000430788	0.000424853	4.69669e-05	0.000500702	0.0797104	1.55461	0.00338993	0.0723357	0.700818	6.63363e-06	0.00566852	0.015532	416.501	0.00164182
6.2535e-13	1.28639e-12	1.06185e-14	9.85747e-16	2.44309e-17	7.87833e-13	3.44882e-14	7.49541e-14	3.34341e-10	2.16732e-11	1.44216e-12	3.78577e-09	5.81578e-13	3.09551e-08	1.79304e-16	6.47012e-15	7.61377e-13	7.895e-13	1.48453e-10	8.45337e-08	1.96964e-13	2.90261e-12	4.52437e-11	4.33996e-13	1.19224e-14	4.32142e-10	7.05027e-13	2.84007e-13	1.55089e-12	9.53713e-09	9.44486e-09	1.23099e-11	4.68921e-12	8.5849e-11	1921.67	0.000235446	0.000430788	0.000424853	4.69669e-05	0.000500702	0.0797104	1.55461	0.00338993	0.0723357	0.700818	6.63363e-06	0.00566852	0.015532	416.501	0.00164182
6.2535e-13	1.28639e-12	1.06185e-14	9.85747e-16	2.44309e-17	7.87833e-13	3.44882e-14	7.49541e-14	3.34341e-10	2.16732e-11	1.44216e-12	3.78577e-09	5.81578e-13	3.09551e-08	1.79304e-16	6.47012e-15	7.61377e-13	7.895e-13	1.48453e-10	8.45337e-08	1.96964e-13	2.90261e-12	4.52437e-11	4.33996e-13	1.19224e-14	4.32142e-10	7.05027e-13	2.84007e-13	1.55089e-12	9.53713e-09	9.44486e-09	1.23099e-11	4.68921e-12	8.5849e-11	1921.67	0.000235446	0.000430788	0.000424853	4.69669e-05	0.000500702	0.0797104	1.55461	0.00338993	0.0723357	0.700818	6.63363e-06	0.00566852	0.015532	416.501	0.00164182
6.2535e-13	1.28639e-12	1.06185e-14	9.85747e-16	2.44309e-17	7.87833e-13	3.44882e-14	7.49541e-14	3.34341e-10	2.16732e-11	1.44216e-12	3.78577e-09	5.81578e-13	3.09551e-08	1.79304e-16	6.47012e-15	7.61377e-13	7.895e-13	1.48453e-10	8.45337e-08	1.96964e-13	2.90261e-12	4.52437e-11	4.33996e-13	1.19224e-14	4.32142e-10	7.05027e-13	2.84007e-13	1.55089e-12	9.53713e-09	9.44486e-09	1.23099e-11	4.68921e-12	8.5849e-11	1921.67	0.000235446	0.000430788	0.000424853	4.69669e-05	0.000500702	0.0797104	1.55461	0.00338993	0.0723357	0.700818	6.63363e-06	0.00566852	0.015532	416.501	0.00164182
6.2535e-13	1.28639e-12	1.06185e-14	9.85747e-16	2.44309e-17	7.87833e-13	3.44882e-14	7.49541e-14	3.34341e-10	2.16732e-11	1.44216e-12	3.78577e-09	5.81578e-13	3.09551e-08	1.79304e-16	6.47012e-15	7.61377e-13	7.895e-13	1.48453e-10	8.45337e-08	1.96964e-13	2.90261e-12	4.52437e-11	4.33996e-13	1.19224e-14	4.32142e-10	7.05027e-13	2.84007e-13	1.55089e-12	9.53713e-09	9.44486e-09	1.23099e-11	4.68921e-12	8.5849e-11	1921.67	0.000235446	0.000430788	0.000424853	4.69669e-05	0.000500702	0.0797104	1.55461	0.00338993	0.0723357	0.700818	6.63363e-06	0.00566852	0.015532	416.501	0.00164182
6.2535e-13	1.28639e-12	1.06185e-14	9.85747e-16	2.44309e-17	7.87833e-13	3.44882e-14	7.49541e-14	3.34341e-10	2.16732e-11	1.44216e-12	3.78577e-09	5.81578e-13	3.09551e-08	1.79304e-16	6.47012e-15	7.61377e-13	7.895e-13	1.48453e-10	8.45337e-08	1.96964e-13	2.90261e-12	4.52437e-11	4.33996e-13	1.19224e-14	4.32142e-10	7.05027e-13	2.84007e-13	1.55089e-12	9.53713e-09	9.44486e-09	1.23099e-11	4.68921e-12	8.5849e-11	1921.67	0.000235446	0.000430788	0.000424853	4.69669e-05	0.000500702	0.0797104	1.55461	0.00338993	0.0723357	0.700818	6.63363e-06	0.00566852	0.015532	416.501	0.00164182
6.2535e-13	1.28639e-12	1.06185e-14	9.85747e-16	2.44309e-17	7.87833e-13	3.44882e-14	7.49541e-14	3.34341e-10	2.16732e-11	1.44216e-12	3.78577e-09	5.81578e-13	3.09551e-08	1.79304e-16	6.47012e-15	7.61377e-13	7.895e-13	1.48453e-10	8.45337e-08	1.96964e-13	2.90261e-12	4.52437e-11	4.33996e-13	1.19224e-14	4.32142e-10	7.05027e-13	2.84007e-13	1.55089e-12	9.53713e-09	9.44486e-09	1.23099e-11	4.68921e-12	8.5849e-11	1921.67	0.000235446	0.000430788	0.000424853	4.69669e-05	0.000500702	0.0797104	1.55461	0.00338993	0.0723357	0.700818	6.63363e-06	0.00566852	0.015532	416.501	0.00164182
6.2535e-13	1.28639e-12	1.06185e-14	9.85747e-16	2.44309e-17	7.87833e-13	3.44882e-14	7.49541e-14	3.34341e-10	2.16732e-11	1.44216e-12	3.78577e-09	5.81578e-13	3.09551e-08	1.79304e-16	6.47012e-15	7.61377e-13	7.895e-13	1.48453e-10	8.45337e-08	1.96964e-13	2.90261e-12	4.52437e-11	4.33996e-13	1.19224e-14	4.32142e-10	7.05027e-13	2.84007e-13	1.55089e-12	9.53713e-09	9.44486e-09	1.23099e-11	4.68921e-12	8.5849e-11	1921.67	0.000235446	0.000430788	0.000424853	4.69669e-05	0.000500702	0.0797104	1.55461	0.00338993	0.0723357	0.700818	6.63363e-06	0.00566852	0.015532	416.501	0.00164182
6.2535e-13	1.28639e-12	1.06185e-14	9.85747e-16	2.44309e-17	7.87833e-13	3.44882e-14	7.49541e-14	3.34341e-10	2.16732e-11	1.44216e-12	3.78577e-09	5.81578e-13	3.09551e-08	1.79304e-16	6.47012e-15	7.61377e-13	7.895e-13	1.48453e-10	8.45337e-08	1.96964e-13	2.90261e-12	4.52437e-11	4.33996e-13	1.19224e-14	4.32142e-10	7.05027e-13	2.84007e-13	1.55089e-12	9.53713e-09	9.44486e-09	1.23099e-11	4.68921e-12	8.5849e-11	1921.67	0.000235446	0.000430788	0.000424853	4.69669e-05	0.000500702	0.0797104	1.55461	0.00338993	0.0723357	0.700818	6.63363e-06	0.00566852	0.015532	416.501	0.00164182
6.2535e-13	1.28639e-12	1.06185e-14	9.85747e-16	2.44309e-17	7.87833e-13	3.44882e-14	7.49541e-14	3.34341e-10	2.16732e-11	1.44216e-12	3.78577e-09	5.81578e-13	3.09551e-08	1.79304e-16	6.47012e-15	7.61377e-13	7.895e-13	1.48453e-10	8.45337e-08	1.96964e-13	2.90261e-12	4.52437e-11	4.33996e-13	1.19224e-14	4.32142e-10	7.05027e-13	2.84007e-13	1.55089e-12	9.53713e-09	9.44486e-09	1.23099e-11	4.68921e-12	8.5849e-11	1921.67	0.000235446	0.000430788	0.000424853	4.69669e-05	0.000500702	0.0797104	1.55461	0.00338993	0.0723357	0.700818	6.63363e-06	0.00566852	0.015532	416.501	0.00164182
6.25861e-13	1.31043e-12	1.50801e-14	1.37548e-15	6.32155e-18	7.81067e-13	4.88042e-14	8.83953e-14	3.5044e-10	1.46696e-11	1.27708e-12	3.72291e-09	4.36555e-13	2.33307e-08	2.73455e-16	5.38183e-15	8.26007e-13	7.16936e-13	9.28206e-11	3.06522e-08	2.87349e-14	2.5106e-12	4.65101e-11	4.11152e-13	2.10628e-14	3.58405e-10	6.90889e-13	1.12016e-13	8.89466e-13	2.35487e-08	9.28238e-09	7.05529e-12	2.65402e-12	1.17573e-10	2278.73	0.000246866	0.000450655	0.00043696	5.12744e-05	0.000326642	0.0921838	1.68226	0.0018736	0.050929	1.21589	6.93518e-06	0.00589461	0.0145919	322.588	0.00217366
6.2535e-13	1.28639e-12	1.06185e-14	9.85747e-16	2.44309e-17	7.87833e-13	3.44882e-14	7.49541e-14	3.34341e-10	2.16732e-11	1.44216e-12	3.78577e-09	5.81578e-13	3.09551e-08	1.79304e-16	6.47012e-15	7.61377e-13	7.895e-13	1.48453e-10	8.45337e-08	1.96964e-13	2.90261e-12	4.52437e-11	4.33996e-13	1.19224e-14	4.32142e-10	7.05027e-13	2.84007e-13	1.55089e-12	9.53713e-09	9.44486e-09	1.23099e-11	4.68921e-12	8.5849e-11	1921.67	0.000235446	0.000430788	0.000424853	4.69669e-05	0.000500702	0.0797104	1.55461	0.00338993	0.0723357	0.700818	6.63363e-06	0.00566852	0.015532	416.501	0.00164182
6.2535e-13	1.28639e-12	1.06185e-14	9.85747e-16	2.44309e-17	7.87833e-13	3.44882e-14	7.49541e-14	3.34341e-10	2.16732e-11	1.44216e-12	3.78577e-09	5.81578e-13	3.09551e-08	1.79304e-16	6.47012e-15	7.61377e-13	7.895e-13	1.48453e-10	8.45337e-08	1.96964e-13	2.90261e-12	4.52437e-11	4.33996e-13	1.19224e-14	4.32142e-10	7.05027e-13	2.84007e-13	1.55089e-12	9.53713e-09	9.44486e-09	1.23099e-11	4.68921e-12	8.5849e-11	1921.67	0.000235446	0.000430788	0.000424853	4.69669e-05	0.000500702	0.0797104	1.55461	0.00338993	0.0723357	0.700818	6.63363e-06	0.00566852	0.015532	416.501	0.00164182
6.2535e-13	1.28639e-12	1.06185e-14	9.85747e-16	2.44309e-17	7.87833e-13	3.44882e-14	7.49541e-14	3.34341e-10	2.16732e-11	1.44216e-12	3.78577e-09	5.81578e-13	3.09551e-08	1.79304e-16	6.47012e-15	7.61377e-13	7.895e-13	1.48453e-10	8.45337e-08	1.96964e-13	2.90261e-12	4.52437e-11	4.33996e-13	1.19224e-14	4.32142e-10	7.05027e-13	2.84007e-13	1.55089e-12	9.53713e-09	9.44486e-09	1.23099e-11	4.68921e-12	8.5849e-11	1921.67	0.000235446	0.000430788	0.000424853	4.69669e-05	0.000500702	0.0797104	1.55461	0.00338993	0.0723357	0.700818	6.63363e-06	0.00566852	0.015532	416.501	0.00164182
6.2535e-13	1.28639e-12	1.06185e-14	9.85747e-16	2.44309e-17	7.87833e-13	3.44882e-14	7.49541e-14	3.34341e-10	2.16732e-11	1.44216e-12	3.78577e-09	5.81578e-13	3.09551e-08	1.79304e-16	6.47012e-15	7.61377e-13	7.895e-13	1.48453e-10	8.45337e-08	1.96964e-13	2.90261e-12	4.52437e-11	4.33996e-13	1.19224e-14	4.32142e-10	7.05027e-13	2.84007e-13	1.55089e-12	9.53713e-09	9.44486e-09	1.23099e-11	4.68921e-12	8.5849e-11	1921.67	0.000235446	0.000430788	0.000424853	4.69669e-05	0.000500702	0.0797104	1.55461	0.00338993	0.0723357	0.700818	6.63363e-06	0.00566852	0.015532	416.501	0.00164182
6.2535e-13	1.28639e-12	1.06185e-14	9.85747e-16	2.44309e-17	7.87833e-13	3.44882e-14	7.49541e-14	3.34341e-10	2.16732e-11	1.44216e-12	3.78577e-09	5.81578e-13	3.09551e-08	1.79304e-16	6.47012e-15	7.61377e-13	7.895e-13	1.48453e-10	8.45337e-08	1.96964e-13	2.90261e-12	4.52437e-11	4.33996e-13	1.19224e-14	4.32142e-10	7.05027e-13	2.84007e-13	1.55089e-12	9.53713e-09	9.44486e-09	1.23099e-11	4.68921e-12	8.5849e-11	1921.67	0.000235446	0.000430788	0.000424853	4.69669e-05	0.000500702	0.0797104	1.55461	0.00338993	0.0723357	0.700818	6.63363e-06	0.00566852	0.015532	416.501	0.00164182
6.25328e-13	1.20144e-12	1.44204e-14	1.24731e-15	1.62724e-17	7.96166e-13	4.50237e-14	7.61906e-14	2.63271e-10	2.99856e-11	1.38468e-12	2.29594e-09	3.77904e-13	3.88932e-08	2.48566e-16	4.60949e-15	7.1004e-13	8.38802e-13	1.85226e-10	4.04846e-08	3.68846e-13	3.35969e-12	5.08673e-11	4.91099e-13	8.40337e-15	3.42977e-10	7.84569e-13	2.3959e-13	1.9923e-12	1.00523e-08	1.22907e-08	2.38388e-11	4.81242e-12	7.8699e-11	914.866	0.000255678	0.000451625	0.00299409	6.47473e-05	0.00100322	0.0847938	2.03163	0.00283218	0.0644005	1.0182	3.98386e-06	0.00523911	0.0116041	333.149	0.00120631
6.2535e-13	1.28639e-12	1.06185e-14	9.85747e-16	2.44309e-17	7.87833e-13	3.44882e-14	7.49541e-14	3.34341e-10	2.16732e-11	1.44216e-12	3.78577e-09	5.81578e-13	3.09551e-08	1.79304e-16	6.47012e-15	7.61377e-13	7.895e-13	1.48453e-10	8.45337e-08	1.96964e-13	2.90261e-12	4.52437e-11	4.33996e-13	1.19224e-14	4.32142e-10	7.05027e-13	2.84007e-13	1.55089e-12	9.53713e-09	9.44486e-09	1.23099e-11	4.68921e-12	8.5849e-11	1921.67	0.000235446	0.000430788	0.000424853	4.69669e-05	0.000500702	0.0797104	1.55461	0.00338993	0.0723357	0.700818	6.63363e-06	0.00566852	0.015532	416.501	0.00164182
6.2535e-13	1.28639e-12	1.06185e-14	9.85747e-16	2.44309e-17	7.87833e-13	3.44882e-14	7.49541e-14	3.34341e-10	2.16732e-11	1.44216e-12	3.78577e-09	5.81578e-13	3.09551e-08	1.79304e-16	6.47012e-15	7.61377e-13	7.895e-13	1.48453e-10	8.45337e-08	1.96964e-13	2.90261e-12	4.52437e-11	4.33996e-13	1.19224e-14	4.32142e-10	7.05027e-13	2.84007e-13	1.55089e-12	9.53713e-09	9.44486e-09	1.23099e-11	4.68921e-12	8.5849e-11	1921.67	0.000235446	0.000430788	0.000424853	4.69669e-05	0.000500702	0.0797104	1.55461	0.00338993	0.0723357	0.700818	6.63363e-06	0.00566852	0.015532	416.501	0.00164182
6.2535e-13	1.28639e-12	1.06185e-14	9.85747e-16	2.44309e-17	7.87833e-13	3.44882e-14	7.49541e-14	3.34341e-10	2.16732e-11	1.44216e-12	3.78577e-09	5.81578e-13	3.09551e-08	1.79304e-16	6.47012e-15	7.61377e-13	7.895e-13	1.48453e-10	8.45337e-08	1.96964e-13	2.90261e-12	4.52437e-11	4.33996e-13	1.19224e-14	4.32142e-10	7.05027e-13	2.84007e-13	1.55089e-12	9.53713e-09	9.44486e-09	1.23099e-11	4.68921e-12	8.5849e-11	1921.67	0.000235446	0.000430788	0.000424853	4.69669e-05	0.000500702	0.0797104	1.55461	0.00338993	0.0723357	0.700818	6.63363e-06	0.00566852	0.015532	416.501	0.00164182
6.2535e-13	1.28639e-12	1.06185e-14	9.85747e-16	2.44309e-17	7.87833e-13	3.44882e-14	7.49541e-14	3.34341e-10	2.16732e-11	1.44216e-12	3.78577e-09	5.81578e-13	3.09551e-08	1.79304e-16	6.47012e-15	7.61377e-13	7.895e-13	1.48453e-10	8.45337e-08	1.96964e-13	2.90261e-12	4.52437e-11	4.33996e-13	1.19224e-14	4.32142e-10	7.05027e-13	2.84007e-13	1.55089e-12	9.53713e-09	9.44486e-09	1.23099e-11	4.68921e-12	8.5849e-11	1921.67	0.000235446	0.000430788	0.000424853	4.69669e-05	0.000500702	0.0797104	1.55461	0.00338993	0.0723357	0.700818	6.63363e-06	0.00566852	0.015532	416.501	0.00164182
6.2535e-13	1.28639e-12	1.06185e-14	9.85747e-16	2.44309e-17	7.87833e-13	3.44882e-14	7.49541e-14	3.34341e-10	2.16732e-11	1.44216e-12	3.78577e-09	5.81578e-13	3.09551e-08	1.79304e-16	6.47012e-15	7.61377e-13	7.895e-13	1.48453e-10	8.45337e-08	1.96964e-13	2.90261e-12	4.52437e-11	4.33996e-13	1.19224e-14	4.32142e-10	7.05027e-13	2.84007e-13	1.55089e-12	9.53713e-09	9.44486e-09	1.23099e-11	4.68921e-12	8.5849e-11	1921.67	0.000235446	0.000430788	0.000424853	4.69669e-05	0.000500702	0.0797104	1.55461	0.00338993	0.0723357	0.700818	6.63363e-06	0.00566852	0.015532	416.501	0.00164182
6.2535e-13	1.28639e-12	1.06185e-14	9.85747e-16	2.44309e-17	7.87833e-13	3.44882e-14	7.49541e-14	3.34341e-10	2.16732e-11	1.44216e-12	3.78577e-09	5.81578e-13	3.09551e-08	1.79304e-16	6.47012e-15	7.61377e-13	7.895e-13	1.48453e-10	8.45337e-08	1.96964e-13	2.90261e-12	4.52437e-11	4.33996e-13	1.19224e-14	4.32142e-10	7.05027e-13	2.84007e-13	1.55089e-12	9.53713e-09	9.44486e-09	1.23099e-11	4.68921e-12	8.5849e-11	1921.67	0.000235446	0.000430788	0.000424853	4.69669e-05	0.000500702	0.0797104	1.55461	0.00338993	0.0723357	0.700818	6.63363e-06	0.00566852	0.015532	416.501	0.00164182
6.2535e-13	1.28639e-12	1.06185e-14	9.85747e-16	2.44309e-17	7.87833e-13	3.44882e-14	7.49541e-14	3.34341e-10	2.16732e-11	1.44216e-12	3.78577e-09	5.81578e-13	3.09551e-08	1.79304e-16	6.47012e-15	7.61377e-13	7.895e-13	1.48453e-10	8.45337e-08	1.96964e-13	2.90261e-12	4.52437e-11	4.33996e-13	1.19224e-14	4.32142e-10	7.05027e-13	2.84007e-13	1.55089e-12	9.53713e-09	9.44486e-09	1.23099e-11	4.68921e-12	8.5849e-11	1921.67	0.000235446	0.000430788	0.000424853	4.69669e-05	0.000500702	0.0797104	1.55461	0.00338993	0.0723357	0.700818	6.63363e-06	0.00566852	0.015532	416.501	0.00164182
6.2535e-13	1.28639e-12	1.06185e-14	9.85747e-16	2.44309e-17	7.87833e-13	3.44882e-14	7.49541e-14	3.34341e-10	2.16732e-11	1.44216e-12	3.78577e-09	5.81578e-13	3.09551e-08	1.79304e-16	6.47012e-15	7.61377e-13	7.895e-13	1.48453e-10	8.45337e-08	1.96964e-13	2.90261e-12	4.52437e-11	4.33996e-13	1.19224e-14	4.32142e-10	7.05027e-13	2.84007e-13	1.55089e-12	9.53713e-09	9.44486e-09	1.23099e-11	4.68921e-12	8.5849e-11	1921.67	0.000235446	0.000430788	0.000424853	4.69669e-05	0.000500702	0.0797104	1.55461	0.00338993	0.0723357	0.700818	6.63363e-06	0.00566852	0.015532	416.501	0.00164182
6.2535e-13	1.28639e-12	1.06185e-14	9.85747e-16	2.44309e-17	7.87833e-13	3.44882e-14	7.49541e-14	3.34341e-10	2.16732e-11	1.44216e-12	3.78577e-09	5.81578e-13	3.09551e-08	1.79304e-16	6.47012e-15	7.61377e-13	7.895e-13	1.48453e-10	8.45337e-08	1.96964e-13	2.90261e-12	4.52437e-11	4.33996e-13	1.19224e-14	4.32142e-10	7.05027e-13	2.84007e-13	1.55089e-12	9.53713e-09	9.44486e-09	1.23099e-11	4.68921e-12	8.5849e-11	1921.67	0.000235446	0.000430788	0.000424853	4.69669e-05	0.000500702	0.0797104	1.55461	0.00338993	0.0723357	0.700818	6.63363e-06	0.00566852	0.015532	416.501	0.00164182
6.2535e-13	1.28639e-12	1.06185e-14	9.85747e-16	2.44309e-17	7.87833e-13	3.44882e-14	7.49541e-14	3.34341e-10	2.16732e-11	1.44216e-12	3.78577e-09	5.81578e-13	3.09551e-08	1.79304e-16	6.47012e-15	7.61377e-13	7.895e-13	1.48453e-10	8.45337e-08	1.96964e-13	2.90261e-12	4.52437e-11	4.33996e-13	1.19224e-14	4.32142e-10	7.05027e-13	2.84007e-13	1.55089e-12	9.53713e-09	9.44486e-09	1.23099e-11	4.68921e-12	8.5849e-11	1921.67	0.000235446	0.000430788	0.000424853	4.69669e-05	0.000500702	0.0797104	1.55461	0.00338993	0.0723357	0.700818	6.63363e-06	0.00566852	0.015532	416.501	0.00164182
6.2535e-13	1.28639e-12	1.06185e-14	9.85747e-16	2.44309e-17	7.87833e-13	3.44882e-14	7.49541e-14	3.34341e-10	2.16732e-11	1.44216e-12	3.78577e-09	5.81578e-13	3.09551e-08	1.79304e-16	6.47012e-15	7.61377e-13	7.895e-13	1.48453e-10	8.45337e-08	1.96964e-13	2.90261e-12	4.52437e-11	4.33996e-13	1.19224e-14	4.32142e-10	7.05027e-13	2.84007e-13	1.55089e-12	9.53713e-09	9.44486e-09	1.23099e-11	4.68921e-12	8.5849e-11	1921.67	0.000235446	0.000430788	0.000424853	4.69669e-05	0.000500702	0.0797104	1.55461	0.00338993	0.0723357	0.700818	6.63363e-06	0.00566852	0.015532	416.501	0.00164182
6.2535e-13	1.28639e-12	1.06185e-14	9.85747e-16	2.44309e-17	7.87833e-13	3.44882e-14	7.49541e-14	3.34341e-10	2.16732e-11	1.44216e-12	3.78577e-09	5.81578e-13	3.09551e-08	1.79304e-16	6.47012e-15	7.61377e-13	7.895e-13	1.48453e-10	8.45337e-08	1.96964e-13	2.90261e-12	4.52437e-11	4.33996e-13	1.19224e-14	4.32142e-10	7.05027e-13	2.84007e-13	1.55089e-12	9.53713e-09	9.44486e-09	1.23099e-11	4.68921e-12	8.5849e-11	1921.67	0.000235446	0.000430788	0.000424853	4.69669e-05	0.000500702	0.0797104	1.55461	0.00338993	0.0723357	0.700818	6.63363e-06	0.00566852	0.015532	416.501	0.00164182
6.2535e-13	1.28639e-12	1.06185e-14	9.85747e-16	2.44309e-17	7.87833e-13	3.44882e-14	7.49541e-14	3.34341e-10	2.16732e-11	1.44216e-12	3.78577e-09	5.81578e-13	3.09551e-08	1.79304e-16	6.47012e-15	7.61377e-13	7.895e-13	1.48453e-10	8.45337e-08	1.96964e-13	2.90261e-12	4.52437e-11	4.33996e-13	1.19224e-14	4.32142e-10	7.05027e-13	2.84007e-13	1.55089e-12	9.53713e-09	9.44486e-09	1.23099e-11	4.68921e-12	8.5849e-11	1921.67	0.000235446	0.000430788	0.000424853	4.69669e-05	0.000500702	0.0797104	1.55461	0.00338993	0.0723357	0.700818	6.63363e-06	0.00566852	0.015532	416.501	0.00164182
6.2535e-13	1.28639e-12	1.06185e-14	9.85747e-16	2.44309e-17	7.87833e-13	3.44882e-14	7.49541e-14	3.34341e-10	2.16732e-11	1.44216e-12	3.78577e-09	5.81578e-13	3.09551e-08	1.79304e-16	6.47012e-15	7.61377e-13	7.895e-13	1.48453e-10	8.45337e-08	1.96964e-13	2.90261e-12	4.52437e-11	4.33996e-13	1.19224e-14	4.32142e-10	7.05027e-13	2.84007e-13	1.55089e-12	9.53713e-09	9.44486e-09	1.23099e-11	4.68921e-12	8.5849e-11	1921.67	0.000235446	0.000430788	0.000424853	4.69669e-05	0.000500702	0.0797104	1.55461	0.00338993	0.0723357	0.700818	6.63363e-06	0.00566852	0.015532	416.501	0.00164182
6.25376e-13	1.19339e-12	1.46335e-14	8.84925e-16	2.30601e-17	7.96998e-13	5.9246e-14	6.88469e-14	3.12318e-10	2.3787e-11	1.41572e-12	3.3712e-09	5.22431e-13	4.40261e-08	7.26729e-17	5.64601e-15	4.61959e-13	7.11991e-13	9.27448e-11	8.75885e-08	2.05805e-13	2.19664e-12	3.99986e-11	4.18401e-13	1.35448e-14	2.09734e-10	6.94047e-13	2.55771e-13	1.28723e-12	9.32252e-09	1.03228e-08	1.88996e-11	3.86893e-12	2.24175e-10	1045.29	0.000241012	0.000446243	0.000110818	3.42827e-05	0.000270028	0.0695156	1.70697	0.0024325	0.0618322	1.12971	8.62936e-06	0.00606729	0.0159677	337.439	0.00169006
6.2535e-13	1.28639e-12	1.06185e-14	9.85747e-16	2.44309e-17	7.87833e-13	3.44882e-14	7.49541e-14	3.34341e-10	2.16732e-11	1.44216e-12	3.78577e-09	5.81578e-13	3.09551e-08	1.79304e-16	6.47012e-15	7.61377e-13	7.895e-13	1.48453e-10	8.45337e-08	1.96964e-13	2.90261e-12	4.52437e-11	4.33996e-13	1.19224e-14	4.32142e-10	7.05027e-13	2.84007e-13	1.55089e-12	9.53713e-09	9.44486e-09	1.23099e-11	4.68921e-12	8.5849e-11	1921.67	0.000235446	0.000430788	0.000424853	4.69669e-05	0.000500702	0.0797104	1.55461	0.00338993	0.0723357	0.700818	6.63363e-06	0.00566852	0.015532	416.501	0.00164182
6.2535e-13	1.28639e-12	1.06185e-14	9.85747e-16	2.44309e-17	7.87833e-13	3.44882e-14	7.49541e-14	3.34341e-10	2.16732e-11	1.44216e-12	3.78577e-09	5.81578e-13	3.09551e-08	1.79304e-16	6.47012e-15	7.61377e-13	7.895e-13	1.48453e-10	8.45337e-08	1.96964e-13	2.90261e-12	4.52437e-11	4.33996e-13	1.19224e-14	4.32142e-10	7.05027e-13	2.84007e-13	1.55089e-12	9.53713e-09	9.44486e-09	1.23099e-11	4.68921e-12	8.5849e-11	1921.67	0.000235446	0.000430788	0.000424853	4.69669e-05	0.000500702	0.0797104	1.55461	0.00338993	0.0723357	0.700818	6.63363e-06	0.00566852	0.015532	416.501	0.00164182
6.2535e-13	1.28639e-12	1.06185e-14	9.85747e-16	2.44309e-17	7.87833e-13	3.44882e-14	7.49541e-14	3.34341e-10	2.16732e-11	1.44216e-12	3.78577e-09	5.81578e-13	3.09551e-08	1.79304e-16	6.47012e-15	7.61377e-13	7.895e-13	1.48453e-10	8.45337e-08	1.96964e-13	2.90261e-12	4.52437e-11	4.33996e-13	1.19224e-14	4.32142e-10	7.05027e-13	2.84007e-13	1.55089e-12	9.53713e-09	9.44486e-09	1.23099e-11	4.68921e-12	8.5849e-11	1921.67	0.000235446	0.000430788	0.000424853	4.69669e-05	0.000500702	0.0797104	1.55461	0.00338993	0.0723357	0.700818	6.63363e-06	0.00566852	0.015532	416.501	0.00164182
6.2587e-13	1.26869e-12	1.74154e-14	8.32126e-16	9.54203e-18	7.15067e-13	3.4491e-14	7.71102e-14	3.06176e-10	1.18407e-11	1.37219e-12	8.19514e-09	5.68218e-13	4.94171e-08	2.38806e-16	8.52137e-15	4.6501e-13	9.1024e-13	1.5682e-10	5.19107e-08	2.15819e-13	2.82751e-12	5.16917e-11	4.82654e-13	1.04882e-14	3.96241e-10	7.9191e-13	2.21628e-13	6.98414e-13	7.75501e-09	1.744e-08	2.03797e-11	5.17284e-12	1.53278e-10	1104.01	0.000254967	0.000437692	0.000482597	6.07498e-05	0.000349697	0.0684705	1.36566	0.00226902	0.0572783	0.562439	1.9112e-06	0.00578114	0.0154229	295.877	0.00221611
6.2535e-13	1.28639e-12	1.06185e-14	9.85747e-16	2.44309e-17	7.87833e-13	3.44882e-14	7.49541e-14	3.34341e-10	2.16732e-11	1.44216e-12	3.78577e-09	5.81578e-13	3.09551e-08	1.79304e-16	6.47012e-15	7.61377e-13	7.895e-13	1.48453e-10	8.45337e-08	1.96964e-13	2.90261e-12	4.52437e-11	4.33996e-13	1.19224e-14	4.32142e-10	7.05027e-13	2.84007e-13	1.55089e-12	9.53713e-09	9.44486e-09	1.23099e-11	4.68921e-12	8.5849e-11	1921.67	0.000235446	0.000430788	0.000424853	4.69669e-05	0.000500702	0.0797104	1.55461	0.00338993	0.0723357	0.700818	6.63363e-06	0.00566852	0.015532	416.501	0.00164182
6.2587e-13	1.5301e-12	1.35491e-14	1.39318e-15	2.62958e-17	7.17102e-13	3.82919e-14	9.70458e-14	3.0236e-10	2.07099e-11	1.40253e-12	1.0269e-08	3.31629e-13	3.10925e-08	2.00238e-16	5.31933e-15	5.58918e-13	7.4965e-13	1.67433e-10	9.97307e-08	1.53403e-13	2.12073e-12	4.68502e-11	4.26956e-13	2.28822e-14	3.39848e-10	7.28746e-13	2.56882e-13	1.27617e-12	9.62544e-09	9.94643e-09	1.0163e-11	5.39013e-12	9.56472e-11	1587.05	0.000228248	0.00040682	0.000510251	6.31138e-05	0.000335787	0.086863	1.13493	0.00415827	0.0404274	0.888265	8.93518e-06	0.00626699	0.0158114	478.136	0.00182492
6.2535e-13	1.28639e-12	1.06185e-14	9.85747e-16	2.44309e-17	7.87833e-13	3.44882e-14	7.49541e-14	3.34341e-10	2.16732e-11	1.44216e-12	3.78577e-09	5.81578e-13	3.09551e-08	1.79304e-16	6.47012e-15	7.61377e-13	7.895e-13	1.48453e-10	8.45337e-08	1.96964e-13	2.90261e-12	4.52437e-11	4.33996e-13	1.19224e-14	4.32142e-10	7.05027e-13	2.84007e-13	1.55089e-12	9.53713e-09	9.44486e-09	1.23099e-11	4.68921e-12	8.5849e-11	1921.67	0.000235446	0.000430788	0.000424853	4.69669e-05	0.000500702	0.0797104	1.55461	0.00338993	0.0723357	0.700818	6.63363e-06	0.00566852	0.015532	416.501	0.00164182
6.2535e-13	1.28639e-12	1.06185e-14	9.85747e-16	2.44309e-17	7.87833e-13	3.44882e-14	7.49541e-14	3.34341e-10	2.16732e-11	1.44216e-12	3.78577e-09	5.81578e-13	3.09551e-08	1.79304e-16	6.47012e-15	7.61377e-13	7.895e-13	1.48453e-10	8.45337e-08	1.96964e-13	2.90261e-12	4.52437e-11	4.33996e-13	1.19224e-14	4.32142e-10	7.05027e-13	2.84007e-13	1.55089e-12	9.53713e-09	9.44486e-09	1.23099e-11	4.68921e-12	8.5849e-11	1921.67	0.000235446	0.000430788	0.000424853	4.69669e-05	0.000500702	0.0797104	1.55461	0.00338993	0.0723357	0.700818	6.63363e-06	0.00566852	0.015532	416.501	0.00164182
6.25244e-13	2.07465e-12	1.77505e-14	1.34611e-15	2.72342e-17	8.56862e-13	2.85298e-14	7.43496e-14	2.39955e-10	1.90312e-11	1.40612e-12	2.26644e-09	7.60267e-13	4.87703e-08	9.10283e-17	7.36206e-15	6.83757e-13	8.17054e-13	1.50054e-10	9.38566e-08	1.53147e-13	2.21003e-12	3.82415e-11	4.59053e-13	1.14051e-14	6.02077e-10	8.0351e-13	2.48831e-13	1.09727e-12	1.11183e-08	9.68354e-09	1.30109e-11	4.00534e-12	6.59869e-11	1100.4	0.000238033	0.000438866	0.000292989	3.93639e-05	0.000334884	0.177897	1.06322	0.00804317	0.0905956	0.665384	5.19443e-06	0.007597	0.0155478	533.51	0.00199801
6.25932e-13	1.51294e-12	1.69611e-14	9.91948e-16	1.71454e-17	8.2662e-13	1.76415e-14	6.34471e-14	3.47498e-10	2.28613e-11	1.35761e-12	3.43765e-09	6.5919e-13	4.20482e-08	1.77539e-16	7.53575e-15	5.19118e-13	8.40991e-13	1.20316e-10	9.61777e-08	2.14027e-13	2.1522e-12	4.75113e-11	4.9501e-13	9.3588e-15	3.2625e-10	8.02491e-13	1.86483e-13	1.4312e-12	1.50151e-08	1.41725e-08	1.17893e-11	2.25725e-12	1.18331e-10	1553.32	0.000237903	0.000468258	0.000412137	5.37827e-05	0.000537738	0.111042	1.37592	0.00576844	0.0526017	0.754563	6.88072e-06	0.00665926	0.0156717	236.829	0.00139898
6.2535e-13	1.28639e-12	1.06185e-14	9.85747e-16	2.44309e-17	7.87833e-13	3.44882e-14	7.49541e-14	3.34341e-10	2.16732e-11	1.44216e-12	3.78577e-09	5.81578e-13	3.09551e-08	1.79304e-16	6.47012e-15	7.61377e-13	7.895e-13	1.48453e-10	8.45337e-08	1.96964e-13	2.90261e-12	4.52437e-11	4.33996e-13	1.19224e-14	4.32142e-10	7.05027e-13	2.84007e-13	1.55089e-12	9.53713e-09	9.44486e-09	1.23099e-11	4.68921e-12	8.5849e-11	1921.67	0.000235446	0.000430788	0.000424853	4.69669e-05	0.000500702	0.0797104	1.55461	0.00338993	0.0723357	0.700818	6.63363e-06	0.00566852	0.015532	416.501	0.00164182
6.2535e-13	1.28639e-12	1.06185e-14	9.85747e-16	2.44309e-17	7.87833e-13	3.44882e-14	7.49541e-14	3.34341e-10	2.16732e-11	1.44216e-12	3.78577e-09	5.81578e-13	3.09551e-08	1.79304e-16	6.47012e-15	7.61377e-13	7.895e-13	1.48453e-10	8.45337e-08	1.96964e-13	2.90261e-12	4.52437e-11	4.33996e-13	1.19224e-14	4.32142e-10	7.05027e-13	2.84007e-13	1.55089e-12	9.53713e-09	9.44486e-09	1.23099e-11	4.68921e-12	8.5849e-11	1921.67	0.000235446	0.000430788	0.000424853	4.69669e-05	0.000500702	0.0797104	1.55461	0.00338993	0.0723357	0.700818	6.63363e-06	0.00566852	0.015532	416.501	0.00164182
6.2535e-13	1.28639e-12	1.06185e-14	9.85747e-16	2.44309e-17	7.87833e-13	3.44882e-14	7.49541e-14	3.34341e-10	2.16732e-11	1.44216e-12	3.78577e-09	5.81578e-13	3.09551e-08	1.79304e-16	6.47012e-15	7.61377e-13	7.895e-13	1.48453e-10	8.45337e-08	1.96964e-13	2.90261e-12	4.52437e-11	4.33996e-13	1.19224e-14	4.32142e-10	7.05027e-13	2.84007e-13	1.55089e-12	9.53713e-09	9.44486e-09	1.23099e-11	4.68921e-12	8.5849e-11	1921.67	0.000235446	0.000430788	0.000424853	4.69669e-05	0.000500702	0.0797104	1.55461	0.00338993	0.0723357	0.700818	6.63363e-06	0.00566852	0.015532	416.501	0.00164182
6.2535e-13	1.28639e-12	1.06185e-14	9.85747e-16	2.44309e-17	7.87833e-13	3.44882e-14	7.49541e-14	3.34341e-10	2.16732e-11	1.44216e-12	3.78577e-09	5.81578e-13	3.09551e-08	1.79304e-16	6.47012e-15	7.61377e-13	7.895e-13	1.48453e-10	8.45337e-08	1.96964e-13	2.90261e-12	4.52437e-11	4.33996e-13	1.19224e-14	4.32142e-10	7.05027e-13	2.84007e-13	1.55089e-12	9.53713e-09	9.44486e-09	1.23099e-11	4.68921e-12	8.5849e-11	1921.67	0.000235446	0.000430788	0.000424853	4.69669e-05	0.000500702	0.0797104	1.55461	0.00338993	0.0723357	0.700818	6.63363e-06	0.00566852	0.015532	416.501	0.00164182
6.2535e-13	1.28639e-12	1.06185e-14	9.85747e-16	2.44309e-17	7.87833e-13	3.44882e-14	7.49541e-14	3.34341e-10	2.16732e-11	1.44216e-12	3.78577e-09	5.81578e-13	3.09551e-08	1.79304e-16	6.47012e-15	7.61377e-13	7.895e-13	1.48453e-10	8.45337e-08	1.96964e-13	2.90261e-12	4.52437e-11	4.33996e-13	1.19224e-14	4.32142e-10	7.05027e-13	2.84007e-13	1.55089e-12	9.53713e-09	9.44486e-09	1.23099e-11	4.68921e-12	8.5849e-11	1921.67	0.000235446	0.000430788	0.000424853	4.69669e-05	0.000500702	0.0797104	1.55461	0.00338993	0.0723357	0.700818	6.63363e-06	0.00566852	0.015532	416.501	0.00164182
6.2535e-13	1.28639e-12	1.06185e-14	9.85747e-16	2.44309e-17	7.87833e-13	3.44882e-14	7.49541e-14	3.34341e-10	2.16732e-11	1.44216e-12	3.78577e-09	5.81578e-13	3.09551e-08	1.79304e-16	6.47012e-15	7.61377e-13	7.895e-13	1.48453e-10	8.45337e-08	1.96964e-13	2.90261e-12	4.52437e-11	4.33996e-13	1.19224e-14	4.32142e-10	7.05027e-13	2.84007e-13	1.55089e-12	9.53713e-09	9.44486e-09	1.23099e-11	4.68921e-12	8.5849e-11	1921.67	0.000235446	0.000430788	0.000424853	4.69669e-05	0.000500702	0.0797104	1.55461	0.00338993	0.0723357	0.700818	6.63363e-06	0.00566852	0.015532	416.501	0.00164182
6.2535e-13	1.28639e-12	1.06185e-14	9.85747e-16	2.44309e-17	7.87833e-13	3.44882e-14	7.49541e-14	3.34341e-10	2.16732e-11	1.44216e-12	3.78577e-09	5.81578e-13	3.09551e-08	1.79304e-16	6.47012e-15	7.61377e-13	7.895e-13	1.48453e-10	8.45337e-08	1.96964e-13	2.90261e-12	4.52437e-11	4.33996e-13	1.19224e-14	4.32142e-10	7.05027e-13	2.84007e-13	1.55089e-12	9.53713e-09	9.44486e-09	1.23099e-11	4.68921e-12	8.5849e-11	1921.67	0.000235446	0.000430788	0.000424853	4.69669e-05	0.000500702	0.0797104	1.55461	0.00338993	0.0723357	0.700818	6.63363e-06	0.00566852	0.015532	416.501	0.00164182
6.2535e-13	1.28639e-12	1.06185e-14	9.85747e-16	2.44309e-17	7.87833e-13	3.44882e-14	7.49541e-14	3.34341e-10	2.16732e-11	1.44216e-12	3.78577e-09	5.81578e-13	3.09551e-08	1.79304e-16	6.47012e-15	7.61377e-13	7.895e-13	1.48453e-10	8.45337e-08	1.96964e-13	2.90261e-12	4.52437e-11	4.33996e-13	1.19224e-14	4.32142e-10	7.05027e-13	2.84007e-13	1.55089e-12	9.53713e-09	9.44486e-09	1.23099e-11	4.68921e-12	8.5849e-11	1921.67	0.000235446	0.000430788	0.000424853	4.69669e-05	0.000500702	0.0797104	1.55461	0.00338993	0.0723357	0.700818	6.63363e-06	0.00566852	0.015532	416.501	0.00164182
6.25635e-13	1.129e-12	1.05189e-14	7.45972e-16	3.41912e-17	7.77535e-13	3.05116e-14	8.5461e-14	2.01248e-10	2.36145e-11	1.41424e-12	4.00294e-09	3.40006e-13	3.20466e-08	8.61797e-17	7.47064e-15	5.27954e-13	7.64165e-13	1.55312e-10	9.59687e-08	1.65964e-13	2.24903e-12	3.7232e-11	3.81986e-13	9.32829e-15	6.87428e-10	7.1195e-13	2.44434e-13	1.16005e-12	1.74414e-08	1.0541e-08	1.51393e-11	3.92197e-12	7.53693e-11	1541.46	0.000235738	0.000441794	0.000180744	3.15214e-05	0.000809574	0.0566394	1.71335	0.00197332	0.0861779	0.870136	7.71366e-06	0.00632944	0.00889451	408.862	0.00188463
6.2535e-13	1.28639e-12	1.06185e-14	9.85747e-16	2.44309e-17	7.87833e-13	3.44882e-14	7.49541e-14	3.34341e-10	2.16732e-11	1.44216e-12	3.78577e-09	5.81578e-13	3.09551e-08	1.79304e-16	6.47012e-15	7.61377e-13	7.895e-13	1.48453e-10	8.45337e-08	1.96964e-13	2.90261e-12	4.52437e-11	4.33996e-13	1.19224e-14	4.32142e-10	7.05027e-13	2.84007e-13	1.55089e-12	9.53713e-09	9.44486e-09	1.23099e-11	4.68921e-12	8.5849e-11	1921.67	0.000235446	0.000430788	0.000424853	4.69669e-05	0.000500702	0.0797104	1.55461	0.00338993	0.0723357	0.700818	6.63363e-06	0.00566852	0.015532	416.501	0.00164182
6.2535e-13	1.28639e-12	1.06185e-14	9.85747e-16	2.44309e-17	7.87833e-13	3.44882e-14	7.49541e-14	3.34341e-10	2.16732e-11	1.44216e-12	3.78577e-09	5.81578e-13	3.09551e-08	1.79304e-16	6.47012e-15	7.61377e-13	7.895e-13	1.48453e-10	8.45337e-08	1.96964e-13	2.90261e-12	4.52437e-11	4.33996e-13	1.19224e-14	4.32142e-10	7.05027e-13	2.84007e-13	1.55089e-12	9.53713e-09	9.44486e-09	1.23099e-11	4.68921e-12	8.5849e-11	1921.67	0.000235446	0.000430788	0.000424853	4.69669e-05	0.000500702	0.0797104	1.55461	0.00338993	0.0723357	0.700818	6.63363e-06	0.00566852	0.015532	416.501	0.00164182
6.2535e-13	1.28639e-12	1.06185e-14	9.85747e-16	2.44309e-17	7.87833e-13	3.44882e-14	7.49541e-14	3.34341e-10	2.16732e-11	1.44216e-12	3.78577e-09	5.81578e-13	3.09551e-08	1.79304e-16	6.47012e-15	7.61377e-13	7.895e-13	1.48453e-10	8.45337e-08	1.96964e-13	2.90261e-12	4.52437e-11	4.33996e-13	1.19224e-14	4.32142e-10	7.05027e-13	2.84007e-13	1.55089e-12	9.53713e-09	9.44486e-09	1.23099e-11	4.68921e-12	8.5849e-11	1921.67	0.000235446	0.000430788	0.000424853	4.69669e-05	0.000500702	0.0797104	1.55461	0.00338993	0.0723357	0.700818	6.63363e-06	0.00566852	0.015532	416.501	0.00164182
6.2535e-13	1.28639e-12	1.06185e-14	9.85747e-16	2.44309e-17	7.87833e-13	3.44882e-14	7.49541e-14	3.34341e-10	2.16732e-11	1.44216e-12	3.78577e-09	5.81578e-13	3.09551e-08	1.79304e-16	6.47012e-15	7.61377e-13	7.895e-13	1.48453e-10	8.45337e-08	1.96964e-13	2.90261e-12	4.52437e-11	4.33996e-13	1.19224e-14	4.32142e-10	7.05027e-13	2.84007e-13	1.55089e-12	9.53713e-09	9.44486e-09	1.23099e-11	4.68921e-12	8.5849e-11	1921.67	0.000235446	0.000430788	0.000424853	4.69669e-05	0.000500702	0.0797104	1.55461	0.00338993	0.0723357	0.700818	6.63363e-06	0.00566852	0.015532	416.501	0.00164182
6.2535e-13	1.28639e-12	1.06185e-14	9.85747e-16	2.44309e-17	7.87833e-13	3.44882e-14	7.49541e-14	3.34341e-10	2.16732e-11	1.44216e-12	3.78577e-09	5.81578e-13	3.09551e-08	1.79304e-16	6.47012e-15	7.61377e-13	7.895e-13	1.48453e-10	8.45337e-08	1.96964e-13	2.90261e-12	4.52437e-11	4.33996e-13	1.19224e-14	4.32142e-10	7.05027e-13	2.84007e-13	1.55089e-12	9.53713e-09	9.44486e-09	1.23099e-11	4.68921e-12	8.5849e-11	1921.67	0.000235446	0.000430788	0.000424853	4.69669e-05	0.000500702	0.0797104	1.55461	0.00338993	0.0723357	0.700818	6.63363e-06	0.00566852	0.015532	416.501	0.00164182
6.2535e-13	1.28639e-12	1.06185e-14	9.85747e-16	2.44309e-17	7.87833e-13	3.44882e-14	7.49541e-14	3.34341e-10	2.16732e-11	1.44216e-12	3.78577e-09	5.81578e-13	3.09551e-08	1.79304e-16	6.47012e-15	7.61377e-13	7.895e-13	1.48453e-10	8.45337e-08	1.96964e-13	2.90261e-12	4.52437e-11	4.33996e-13	1.19224e-14	4.32142e-10	7.05027e-13	2.84007e-13	1.55089e-12	9.53713e-09	9.44486e-09	1.23099e-11	4.68921e-12	8.5849e-11	1921.67	0.000235446	0.000430788	0.000424853	4.69669e-05	0.000500702	0.0797104	1.55461	0.00338993	0.0723357	0.700818	6.63363e-06	0.00566852	0.015532	416.501	0.00164182
6.2535e-13	1.28639e-12	1.06185e-14	9.85747e-16	2.44309e-17	7.87833e-13	3.44882e-14	7.49541e-14	3.34341e-10	2.16732e-11	1.44216e-12	3.78577e-09	5.81578e-13	3.09551e-08	1.79304e-16	6.47012e-15	7.61377e-13	7.895e-13	1.48453e-10	8.45337e-08	1.96964e-13	2.90261e-12	4.52437e-11	4.33996e-13	1.19224e-14	4.32142e-10	7.05027e-13	2.84007e-13	1.55089e-12	9.53713e-09	9.44486e-09	1.23099e-11	4.68921e-12	8.5849e-11	1921.67	0.000235446	0.000430788	0.000424853	4.69669e-05	0.000500702	0.0797104	1.55461	0.00338993	0.0723357	0.700818	6.63363e-06	0.00566852	0.015532	416.501	0.00164182
6.2535e-13	1.28639e-12	1.06185e-14	9.85747e-16	2.44309e-17	7.87833e-13	3.44882e-14	7.49541e-14	3.34341e-10	2.16732e-11	1.44216e-12	3.78577e-09	5.81578e-13	3.09551e-08	1.79304e-16	6.47012e-15	7.61377e-13	7.895e-13	1.48453e-10	8.45337e-08	1.96964e-13	2.90261e-12	4.52437e-11	4.33996e-13	1.19224e-14	4.32142e-10	7.05027e-13	2.84007e-13	1.55089e-12	9.53713e-09	9.44486e-09	1.23099e-11	4.68921e-12	8.5849e-11	1921.67	0.000235446	0.000430788	0.000424853	4.69669e-05	0.000500702	0.0797104	1.55461	0.00338993	0.0723357	0.700818	6.63363e-06	0.00566852	0.015532	416.501	0.00164182
6.25254e-13	1.21382e-12	1.27472e-14	8.57039e-16	2.70175e-17	8.28743e-13	2.77421e-14	7.19235e-14	2.69148e-10	3.56492e-11	1.35535e-12	2.87084e-09	3.83111e-13	3.87743e-08	1.45988e-16	6.58238e-15	6.56832e-13	7.83283e-13	9.82257e-11	8.7434e-08	1.70032e-13	3.58567e-12	6.29903e-11	4.33754e-13	1.24719e-14	6.09666e-10	6.82266e-13	1.91448e-13	1.30468e-12	5.13806e-09	1.13187e-08	1.09726e-11	2.60629e-12	1.27478e-10	1515.64	0.000214419	0.000437903	0.00049213	6.60236e-05	0.000325886	0.0518514	1.32285	0.00918632	0.0552243	0.538633	5.46895e-06	0.00638087	0.0141642	2456.03	0.00187886
6.2535e-13	1.28639e-12	1.06185e-14	9.85747e-16	2.44309e-17	7.87833e-13	3.44882e-14	7.49541e-14	3.34341e-10	2.16732e-11	1.44216e-12	3.78577e-09	5.81578e-13	3.09551e-08	1.79304e-16	6.47012e-15	7.61377e-13	7.895e-13	1.48453e-10	8.45337e-08	1.96964e-13	2.90261e-12	4.52437e-11	4.33996e-13	1.19224e-14	4.32142e-10	7.05027e-13	2.84007e-13	1.55089e-12	9.53713e-09	9.44486e-09	1.23099e-11	4.68921e-12	8.5849e-11	1921.67	0.000235446	0.000430788	0.000424853	4.69669e-05	0.000500702	0.0797104	1.55461	0.00338993	0.0723357	0.700818	6.63363e-06	0.00566852	0.015532	416.501	0.00164182
6.2535e-13	1.28639e-12	1.06185e-14	9.85747e-16	2.44309e-17	7.87833e-13	3.44882e-14	7.49541e-14	3.34341e-10	2.16732e-11	1.44216e-12	3.78577e-09	5.81578e-13	3.09551e-08	1.79304e-16	6.47012e-15	7.61377e-13	7.895e-13	1.48453e-10	8.45337e-08	1.96964e-13	2.90261e-12	4.52437e-11	4.33996e-13	1.19224e-14	4.32142e-10	7.05027e-13	2.84007e-13	1.55089e-12	9.53713e-09	9.44486e-09	1.23099e-11	4.68921e-12	8.5849e-11	1921.67	0.000235446	0.000430788	0.000424853	4.69669e-05	0.000500702	0.0797104	1.55461	0.00338993	0.0723357	0.700818	6.63363e-06	0.00566852	0.015532	416.501	0.00164182
6.25563e-13	1.25287e-12	1.19269e-14	8.907e-16	2.82039e-17	8.08023e-13	3.87435e-14	8.56601e-14	3.48864e-10	3.04156e-11	1.38952e-12	1.94252e-09	5.0095e-13	3.07738e-08	7.47453e-17	6.25862e-15	9.22241e-13	7.80822e-13	1.57673e-10	9.62447e-08	2.13312e-13	2.71618e-12	4.54585e-11	4.42592e-13	7.47291e-15	2.24098e-10	7.64754e-13	2.2465e-13	1.26444e-12	1.10747e-08	1.34193e-08	1.04061e-11	3.16294e-12	1.30176e-10	1669.19	0.000230801	0.000425677	0.00053205	3.93568e-05	0.000412787	0.0911718	1.85564	0.00220361	0.176869	0.924171	7.75941e-06	0.00582616	0.0172445	208.966	0.00186431
6.2535e-13	1.28639e-12	1.06185e-14	9.85747e-16	2.44309e-17	7.87833e-13	3.44882e-14	7.49541e-14	3.34341e-10	2.16732e-11	1.44216e-12	3.78577e-09	5.81578e-13	3.09551e-08	1.79304e-16	6.47012e-15	7.61377e-13	7.895e-13	1.48453e-10	8.45337e-08	1.96964e-13	2.90261e-12	4.52437e-11	4.33996e-13	1.19224e-14	4.32142e-10	7.05027e-13	2.84007e-13	1.55089e-12	9.53713e-09	9.44486e-09	1.23099e-11	4.68921e-12	8.5849e-11	1921.67	0.000235446	0.000430788	0.000424853	4.69669e-05	0.000500702	0.0797104	1.55461	0.00338993	0.0723357	0.700818	6.63363e-06	0.00566852	0.015532	416.501	0.00164182
6.2535e-13	1.28639e-12	1.06185e-14	9.85747e-16	2.44309e-17	7.87833e-13	3.44882e-14	7.49541e-14	3.34341e-10	2.16732e-11	1.44216e-12	3.78577e-09	5.81578e-13	3.09551e-08	1.79304e-16	6.47012e-15	7.61377e-13	7.895e-13	1.48453e-10	8.45337e-08	1.96964e-13	2.90261e-12	4.52437e-11	4.33996e-13	1.19224e-14	4.32142e-10	7.05027e-13	2.84007e-13	1.55089e-12	9.53713e-09	9.44486e-09	1.23099e-11	4.68921e-12	8.5849e-11	1921.67	0.000235446	0.000430788	0.000424853	4.69669e-05	0.000500702	0.0797104	1.55461	0.00338993	0.0723357	0.700818	6.63363e-06	0.00566852	0.015532	416.501	0.00164182
6.25958e-13	1.4277e-12	1.15037e-14	7.05985e-16	2.57038e-17	7.21435e-13	4.95354e-14	6.66799e-14	2.71499e-10	2.56459e-11	1.357e-12	4.31281e-09	4.46736e-13	1.42752e-08	1.19494e-16	8.54546e-15	2.63414e-13	7.69495e-13	1.4339e-10	9.89555e-08	1.84059e-13	1.27877e-12	3.83876e-11	3.79927e-13	7.00561e-15	6.90746e-10	7.98919e-13	1.67297e-13	1.01784e-12	9.86852e-09	1.84958e-08	3.94549e-11	4.37362e-12	1.28763e-10	1620.66	0.000235434	0.000424094	0.000344606	5.89802e-05	0.00054537	0.0767896	1.1373	0.00470762	0.0285469	1.26828	6.49427e-06	0.00648422	0.00917419	576.212	0.00205504
6.2535e-13	1.28639e-12	1.06185e-14	9.85747e-16	2.44309e-17	7.87833e-13	3.44882e-14	7.49541e-14	3.34341e-10	2.16732e-11	1.44216e-12	3.78577e-09	5.81578e-13	3.09551e-08	1.79304e-16	6.47012e-15	7.61377e-13	7.895e-13	1.48453e-10	8.45337e-08	1.96964e-13	2.90261e-12	4.52437e-11	4.33996e-13	1.19224e-14	4.32142e-10	7.05027e-13	2.84007e-13	1.55089e-12	9.53713e-09	9.44486e-09	1.23099e-11	4.68921e-12	8.5849e-11	1921.67	0.000235446	0.000430788	0.000424853	4.69669e-05	0.000500702	0.0797104	1.55461	0.00338993	0.0723357	0.700818	6.63363e-06	0.00566852	0.015532	416.501	0.00164182
6.2535e-13	1.28639e-12	1.06185e-14	9.85747e-16	2.44309e-17	7.87833e-13	3.44882e-14	7.49541e-14	3.34341e-10	2.16732e-11	1.44216e-12	3.78577e-09	5.81578e-13	3.09551e-08	1.79304e-16	6.47012e-15	7.61377e-13	7.895e-13	1.48453e-10	8.45337e-08	1.96964e-13	2.90261e-12	4.52437e-11	4.33996e-13	1.19224e-14	4.32142e-10	7.05027e-13	2.84007e-13	1.55089e-12	9.53713e-09	9.44486e-09	1.23099e-11	4.68921e-12	8.5849e-11	1921.67	0.000235446	0.000430788	0.000424853	4.69669e-05	0.000500702	0.0797104	1.55461	0.00338993	0.0723357	0.700818	6.63363e-06	0.00566852	0.015532	416.501	0.00164182
6.2535e-13	1.28639e-12	1.06185e-14	9.85747e-16	2.44309e-17	7.87833e-13	3.44882e-14	7.49541e-14	3.34341e-10	2.16732e-11	1.44216e-12	3.78577e-09	5.81578e-13	3.09551e-08	1.79304e-16	6.47012e-15	7.61377e-13	7.895e-13	1.48453e-10	8.45337e-08	1.96964e-13	2.90261e-12	4.52437e-11	4.33996e-13	1.19224e-14	4.32142e-10	7.05027e-13	2.84007e-13	1.55089e-12	9.53713e-09	9.44486e-09	1.23099e-11	4.68921e-12	8.5849e-11	1921.67	0.000235446	0.000430788	0.000424853	4.69669e-05	0.000500702	0.0797104	1.55461	0.00338993	0.0723357	0.700818	6.63363e-06	0.00566852	0.015532	416.501	0.00164182
6.2535e-13	1.28639e-12	1.06185e-14	9.85747e-16	2.44309e-17	7.87833e-13	3.44882e-14	7.49541e-14	3.34341e-10	2.16732e-11	1.44216e-12	3.78577e-09	5.81578e-13	3.09551e-08	1.79304e-16	6.47012e-15	7.61377e-13	7.895e-13	1.48453e-10	8.45337e-08	1.96964e-13	2.90261e-12	4.52437e-11	4.33996e-13	1.19224e-14	4.32142e-10	7.05027e-13	2.84007e-13	1.55089e-12	9.53713e-09	9.44486e-09	1.23099e-11	4.68921e-12	8.5849e-11	1921.67	0.000235446	0.000430788	0.000424853	4.69669e-05	0.000500702	0.0797104	1.55461	0.00338993	0.0723357	0.700818	6.63363e-06	0.00566852	0.015532	416.501	0.00164182
6.25685e-13	1.18826e-12	3.25283e-14	1.20018e-15	2.90635e-17	7.76036e-13	4.37146e-14	9.11916e-14	4.04599e-10	2.76592e-11	1.41036e-12	3.69408e-09	4.89625e-13	4.09226e-08	3.4811e-16	6.13458e-15	4.97759e-13	8.97492e-13	1.13015e-10	9.08229e-08	3.09257e-13	2.74305e-12	5.59647e-11	4.77787e-13	1.20072e-14	2.5629e-10	7.36937e-13	2.80571e-13	2.13567e-12	5.91533e-09	1.3716e-08	1.89083e-11	6.11939e-12	8.79862e-11	3059.59	0.000238274	0.0004358	0.000568163	5.17344e-05	0.000328754	0.101392	2.57078	0.00160577	0.0848443	1.26457	1.29584e-05	0.00698167	0.0150599	454.057	0.00172772
6.2535e-13	1.28639e-12	1.06185e-14	9.85747e-16	2.44309e-17	7.87833e-13	3.44882e-14	7.49541e-14	3.34341e-10	2.16732e-11	1.44216e-12	3.78577e-09	5.81578e-13	3.09551e-08	1.79304e-16	6.47012e-15	7.61377e-13	7.895e-13	1.48453e-10	8.45337e-08	1.96964e-13	2.90261e-12	4.52437e-11	4.33996e-13	1.19224e-14	4.32142e-10	7.05027e-13	2.84007e-13	1.55089e-12	9.53713e-09	9.44486e-09	1.23099e-11	4.68921e-12	8.5849e-11	1921.67	0.000235446	0.000430788	0.000424853	4.69669e-05	0.000500702	0.0797104	1.55461	0.00338993	0.0723357	0.700818	6.63363e-06	0.00566852	0.015532	416.501	0.00164182
6.2535e-13	1.28639e-12	1.06185e-14	9.85747e-16	2.44309e-17	7.87833e-13	3.44882e-14	7.49541e-14	3.34341e-10	2.16732e-11	1.44216e-12	3.78577e-09	5.81578e-13	3.09551e-08	1.79304e-16	6.47012e-15	7.61377e-13	7.895e-13	1.48453e-10	8.45337e-08	1.96964e-13	2.90261e-12	4.52437e-11	4.33996e-13	1.19224e-14	4.32142e-10	7.05027e-13	2.84007e-13	1.55089e-12	9.53713e-09	9.44486e-09	1.23099e-11	4.68921e-12	8.5849e-11	1921.67	0.000235446	0.000430788	0.000424853	4.69669e-05	0.000500702	0.0797104	1.55461	0.00338993	0.0723357	0.700818	6.63363e-06	0.00566852	0.015532	416.501	0.00164182
6.2535e-13	1.28639e-12	1.06185e-14	9.85747e-16	2.44309e-17	7.87833e-13	3.44882e-14	7.49541e-14	3.34341e-10	2.16732e-11	1.44216e-12	3.78577e-09	5.81578e-13	3.09551e-08	1.79304e-16	6.47012e-15	7.61377e-13	7.895e-13	1.48453e-10	8.45337e-08	1.96964e-13	2.90261e-12	4.52437e-11	4.33996e-13	1.19224e-14	4.32142e-10	7.05027e-13	2.84007e-13	1.55089e-12	9.53713e-09	9.44486e-09	1.23099e-11	4.68921e-12	8.5849e-11	1921.67	0.000235446	0.000430788	0.000424853	4.69669e-05	0.000500702	0.0797104	1.55461	0.00338993	0.0723357	0.700818	6.63363e-06	0.00566852	0.015532	416.501	0.00164182
6.2535e-13	1.28639e-12	1.06185e-14	9.85747e-16	2.44309e-17	7.87833e-13	3.44882e-14	7.49541e-14	3.34341e-10	2.16732e-11	1.44216e-12	3.78577e-09	5.81578e-13	3.09551e-08	1.79304e-16	6.47012e-15	7.61377e-13	7.895e-13	1.48453e-10	8.45337e-08	1.96964e-13	2.90261e-12	4.52437e-11	4.33996e-13	1.19224e-14	4.32142e-10	7.05027e-13	2.84007e-13	1.55089e-12	9.53713e-09	9.44486e-09	1.23099e-11	4.68921e-12	8.5849e-11	1921.67	0.000235446	0.000430788	0.000424853	4.69669e-05	0.000500702	0.0797104	1.55461	0.00338993	0.0723357	0.700818	6.63363e-06	0.00566852	0.015532	416.501	0.00164182
6.2535e-13	1.28639e-12	1.06185e-14	9.85747e-16	2.44309e-17	7.87833e-13	3.44882e-14	7.49541e-14	3.34341e-10	2.16732e-11	1.44216e-12	3.78577e-09	5.81578e-13	3.09551e-08	1.79304e-16	6.47012e-15	7.61377e-13	7.895e-13	1.48453e-10	8.45337e-08	1.96964e-13	2.90261e-12	4.52437e-11	4.33996e-13	1.19224e-14	4.32142e-10	7.05027e-13	2.84007e-13	1.55089e-12	9.53713e-09	9.44486e-09	1.23099e-11	4.68921e-12	8.5849e-11	1921.67	0.000235446	0.000430788	0.000424853	4.69669e-05	0.000500702	0.0797104	1.55461	0.00338993	0.0723357	0.700818	6.63363e-06	0.00566852	0.015532	416.501	0.00164182
6.25885e-13	1.54166e-12	1.67251e-14	1.13831e-15	1.60021e-17	7.69138e-13	3.87129e-14	5.70368e-14	3.03419e-10	3.69789e-11	1.37458e-12	2.67592e-09	3.71585e-13	4.07014e-08	1.40971e-16	4.73964e-15	6.42224e-13	8.0532e-13	1.45607e-10	8.49562e-08	1.09925e-13	2.86363e-12	5.89266e-11	4.06374e-13	1.36529e-14	4.47386e-10	8.13645e-13	1.70939e-13	1.22339e-12	7.5644e-09	1.24432e-08	1.14903e-11	1.11696e-11	1.79934e-10	3985.83	0.000237496	0.000424824	0.000508944	6.03342e-05	0.000381985	0.0753251	0.974738	0.00441938	0.0760583	1.47855	5.25722e-06	0.00633189	0.012093	482.864	0.00180816
6.2535e-13	1.28639e-12	1.06185e-14	9.85747e-16	2.44309e-17	7.87833e-13	3.44882e-14	7.49541e-14	3.34341e-10	2.16732e-11	1.44216e-12	3.78577e-09	5.81578e-13	3.09551e-08	1.79304e-16	6.47012e-15	7.61377e-13	7.895e-13	1.48453e-10	8.45337e-08	1.96964e-13	2.90261e-12	4.52437e-11	4.33996e-13	1.19224e-14	4.32142e-10	7.05027e-13	2.84007e-13	1.55089e-12	9.53713e-09	9.44486e-09	1.23099e-11	4.68921e-12	8.5849e-11	1921.67	0.000235446	0.000430788	0.000424853	4.69669e-05	0.000500702	0.0797104	1.55461	0.00338993	0.0723357	0.700818	6.63363e-06	0.00566852	0.015532	416.501	0.00164182
6.2535e-13	1.28639e-12	1.06185e-14	9.85747e-16	2.44309e-17	7.87833e-13	3.44882e-14	7.49541e-14	3.34341e-10	2.16732e-11	1.44216e-12	3.78577e-09	5.81578e-13	3.09551e-08	1.79304e-16	6.47012e-15	7.61377e-13	7.895e-13	1.48453e-10	8.45337e-08	1.96964e-13	2.90261e-12	4.52437e-11	4.33996e-13	1.19224e-14	4.32142e-10	7.05027e-13	2.84007e-13	1.55089e-12	9.53713e-09	9.44486e-09	1.23099e-11	4.68921e-12	8.5849e-11	1921.67	0.000235446	0.000430788	0.000424853	4.69669e-05	0.000500702	0.0797104	1.55461	0.00338993	0.0723357	0.700818	6.63363e-06	0.00566852	0.015532	416.501	0.00164182
6.2535e-13	1.28639e-12	1.06185e-14	9.85747e-16	2.44309e-17	7.87833e-13	3.44882e-14	7.49541e-14	3.34341e-10	2.16732e-11	1.44216e-12	3.78577e-09	5.81578e-13	3.09551e-08	1.79304e-16	6.47012e-15	7.61377e-13	7.895e-13	1.48453e-10	8.45337e-08	1.96964e-13	2.90261e-12	4.52437e-11	4.33996e-13	1.19224e-14	4.32142e-10	7.05027e-13	2.84007e-13	1.55089e-12	9.53713e-09	9.44486e-09	1.23099e-11	4.68921e-12	8.5849e-11	1921.67	0.000235446	0.000430788	0.000424853	4.69669e-05	0.000500702	0.0797104	1.55461	0.00338993	0.0723357	0.700818	6.63363e-06	0.00566852	0.015532	416.501	0.00164182
6.21341e-13	1.34909e-12	1.67261e-14	1.12149e-15	2.42697e-17	8.97638e-13	3.50693e-14	7.81869e-14	2.34857e-10	1.81338e-11	1.34414e-12	3.15565e-09	4.71893e-13	4.63841e-08	2.28514e-16	3.89167e-15	6.48413e-13	8.00745e-13	1.31071e-10	7.42952e-08	2.53697e-13	2.7057e-12	3.75575e-11	4.83971e-13	1.04583e-14	4.29777e-10	7.6117e-13	2.06277e-13	1.82202e-12	1.86834e-08	8.74138e-09	1.02826e-11	8.33414e-12	1.47115e-10	1878.32	0.000243735	0.00041877	0.0012166	4.6886e-05	0.000530801	0.0672882	1.20685	0.00276573	0.0712978	0.922602	9.33189e-06	0.0102573	0.0114367	3659.6	0.0015031
6.25507e-13	1.70487e-12	1.56641e-14	9.52592e-16	9.87713e-18	7.41095e-13	4.35659e-14	1.18113e-13	2.63608e-10	1.69689e-11	1.37071e-12	6.29889e-09	4.28512e-13	2.39599e-08	1.4449e-16	7.92499e-15	1.05391e-12	7.66676e-13	1.96394e-10	6.4398e-08	1.37814e-13	3.18122e-12	4.00044e-11	4.02455e-13	1.27681e-14	3.11548e-10	7.29637e-13	2.55477e-13	1.45942e-12	1.57204e-08	1.1785e-08	7.40274e-12	3.41744e-12	1.23177e-10	1279.68	0.000221821	0.00042289	0.000478696	6.19523e-05	0.000712777	0.137776	1.28641	0.00137057	0.0490335	1.0983	4.35215e-06	0.00423293	0.0113712	166.776	0.00164473
6.2535e-13	1.28639e-12	1.06185e-14	9.85747e-16	2.44309e-17	7.87833e-13	3.44882e-14	7.49541e-14	3.34341e-10	2.16732e-11	1.44216e-12	3.78577e-09	5.81578e-13	3.09551e-08	1.79304e-16	6.47012e-15	7.61377e-13	7.895e-13	1.48453e-10	8.45337e-08	1.96964e-13	2.90261e-12	4.52437e-11	4.33996e-13	1.19224e-14	4.32142e-10	7.05027e-13	2.84007e-13	1.55089e-12	9.53713e-09	9.44486e-09	1.23099e-11	4.68921e-12	8.5849e-11	1921.67	0.000235446	0.000430788	0.000424853	4.69669e-05	0.000500702	0.0797104	1.55461	0.00338993	0.0723357	0.700818	6.63363e-06	0.00566852	0.015532	416.501	0.00164182
6.2535e-13	1.28639e-12	1.06185e-14	9.85747e-16	2.44309e-17	7.87833e-13	3.44882e-14	7.49541e-14	3.34341e-10	2.16732e-11	1.44216e-12	3.78577e-09	5.81578e-13	3.09551e-08	1.79304e-16	6.47012e-15	7.61377e-13	7.895e-13	1.48453e-10	8.45337e-08	1.96964e-13	2.90261e-12	4.52437e-11	4.33996e-13	1.19224e-14	4.32142e-10	7.05027e-13	2.84007e-13	1.55089e-12	9.53713e-09	9.44486e-09	1.23099e-11	4.68921e-12	8.5849e-11	1921.67	0.000235446	0.000430788	0.000424853	4.69669e-05	0.000500702	0.0797104	1.55461	0.00338993	0.0723357	0.700818	6.63363e-06	0.00566852	0.015532	416.501	0.00164182
6.2535e-13	1.28639e-12	1.06185e-14	9.85747e-16	2.44309e-17	7.87833e-13	3.44882e-14	7.49541e-14	3.34341e-10	2.16732e-11	1.44216e-12	3.78577e-09	5.81578e-13	3.09551e-08	1.79304e-16	6.47012e-15	7.61377e-13	7.895e-13	1.48453e-10	8.45337e-08	1.96964e-13	2.90261e-12	4.52437e-11	4.33996e-13	1.19224e-14	4.32142e-10	7.05027e-13	2.84007e-13	1.55089e-12	9.53713e-09	9.44486e-09	1.23099e-11	4.68921e-12	8.5849e-11	1921.67	0.000235446	0.000430788	0.000424853	4.69669e-05	0.000500702	0.0797104	1.55461	0.00338993	0.0723357	0.700818	6.63363e-06	0.00566852	0.015532	416.501	0.00164182
6.2535e-13	1.28639e-12	1.06185e-14	9.85747e-16	2.44309e-17	7.87833e-13	3.44882e-14	7.49541e-14	3.34341e-10	2.16732e-11	1.44216e-12	3.78577e-09	5.81578e-13	3.09551e-08	1.79304e-16	6.47012e-15	7.61377e-13	7.895e-13	1.48453e-10	8.45337e-08	1.96964e-13	2.90261e-12	4.52437e-11	4.33996e-13	1.19224e-14	4.32142e-10	7.05027e-13	2.84007e-13	1.55089e-12	9.53713e-09	9.44486e-09	1.23099e-11	4.68921e-12	8.5849e-11	1921.67	0.000235446	0.000430788	0.000424853	4.69669e-05	0.000500702	0.0797104	1.55461	0.00338993	0.0723357	0.700818	6.63363e-06	0.00566852	0.015532	416.501	0.00164182
6.2535e-13	1.28639e-12	1.06185e-14	9.85747e-16	2.44309e-17	7.87833e-13	3.44882e-14	7.49541e-14	3.34341e-10	2.16732e-11	1.44216e-12	3.78577e-09	5.81578e-13	3.09551e-08	1.79304e-16	6.47012e-15	7.61377e-13	7.895e-13	1.48453e-10	8.45337e-08	1.96964e-13	2.90261e-12	4.52437e-11	4.33996e-13	1.19224e-14	4.32142e-10	7.05027e-13	2.84007e-13	1.55089e-12	9.53713e-09	9.44486e-09	1.23099e-11	4.68921e-12	8.5849e-11	1921.67	0.000235446	0.000430788	0.000424853	4.69669e-05	0.000500702	0.0797104	1.55461	0.00338993	0.0723357	0.700818	6.63363e-06	0.00566852	0.015532	416.501	0.00164182
6.2535e-13	1.28639e-12	1.06185e-14	9.85747e-16	2.44309e-17	7.87833e-13	3.44882e-14	7.49541e-14	3.34341e-10	2.16732e-11	1.44216e-12	3.78577e-09	5.81578e-13	3.09551e-08	1.79304e-16	6.47012e-15	7.61377e-13	7.895e-13	1.48453e-10	8.45337e-08	1.96964e-13	2.90261e-12	4.52437e-11	4.33996e-13	1.19224e-14	4.32142e-10	7.05027e-13	2.84007e-13	1.55089e-12	9.53713e-09	9.44486e-09	1.23099e-11	4.68921e-12	8.5849e-11	1921.67	0.000235446	0.000430788	0.000424853	4.69669e-05	0.000500702	0.0797104	1.55461	0.00338993	0.0723357	0.700818	6.63363e-06	0.00566852	0.015532	416.501	0.00164182
6.2535e-13	1.28639e-12	1.06185e-14	9.85747e-16	2.44309e-17	7.87833e-13	3.44882e-14	7.49541e-14	3.34341e-10	2.16732e-11	1.44216e-12	3.78577e-09	5.81578e-13	3.09551e-08	1.79304e-16	6.47012e-15	7.61377e-13	7.895e-13	1.48453e-10	8.45337e-08	1.96964e-13	2.90261e-12	4.52437e-11	4.33996e-13	1.19224e-14	4.32142e-10	7.05027e-13	2.84007e-13	1.55089e-12	9.53713e-09	9.44486e-09	1.23099e-11	4.68921e-12	8.5849e-11	1921.67	0.000235446	0.000430788	0.000424853	4.69669e-05	0.000500702	0.0797104	1.55461	0.00338993	0.0723357	0.700818	6.63363e-06	0.00566852	0.015532	416.501	0.00164182
6.2535e-13	1.28639e-12	1.06185e-14	9.85747e-16	2.44309e-17	7.87833e-13	3.44882e-14	7.49541e-14	3.34341e-10	2.16732e-11	1.44216e-12	3.78577e-09	5.81578e-13	3.09551e-08	1.79304e-16	6.47012e-15	7.61377e-13	7.895e-13	1.48453e-10	8.45337e-08	1.96964e-13	2.90261e-12	4.52437e-11	4.33996e-13	1.19224e-14	4.32142e-10	7.05027e-13	2.84007e-13	1.55089e-12	9.53713e-09	9.44486e-09	1.23099e-11	4.68921e-12	8.5849e-11	1921.67	0.000235446	0.000430788	0.000424853	4.69669e-05	0.000500702	0.0797104	1.55461	0.00338993	0.0723357	0.700818	6.63363e-06	0.00566852	0.015532	416.501	0.00164182
6.25482e-13	1.08501e-12	1.26589e-14	1.51267e-15	2.31519e-17	9.13939e-13	4.12727e-14	1.1297e-13	2.30338e-10	2.42359e-11	1.32742e-12	4.90497e-09	6.15936e-13	3.34151e-08	2.28277e-16	6.51528e-15	3.17536e-13	9.55664e-13	1.37206e-10	9.14202e-08	2.61084e-13	3.18864e-12	6.63951e-11	5.80486e-13	2.0761e-14	2.05279e-10	8.78756e-13	2.00103e-13	2.22287e-12	9.72994e-09	1.01693e-08	1.6259e-11	3.14268e-12	8.67803e-11	3567.62	0.000236633	0.000434665	0.000239713	3.85319e-05	0.000523839	0.0738031	2.61489	0.00346192	0.049827	0.898907	4.85661e-06	0.00842728	0.0141788	378.514	0.00188323
6.2535e-13	1.28639e-12	1.06185e-14	9.85747e-16	2.44309e-17	7.87833e-13	3.44882e-14	7.49541e-14	3.34341e-10	2.16732e-11	1.44216e-12	3.78577e-09	5.81578e-13	3.09551e-08	1.79304e-16	6.47012e-15	7.61377e-13	7.895e-13	1.48453e-10	8.45337e-08	1.96964e-13	2.90261e-12	4.52437e-11	4.33996e-13	1.19224e-14	4.32142e-10	7.05027e-13	2.84007e-13	1.55089e-12	9.53713e-09	9.44486e-09	1.23099e-11	4.68921e-12	8.5849e-11	1921.67	0.000235446	0.000430788	0.000424853	4.69669e-05	0.000500702	0.0797104	1.55461	0.00338993	0.0723357	0.700818	6.63363e-06	0.00566852	0.015532	416.501	0.00164182
6.2535e-13	1.28639e-12	1.06185e-14	9.85747e-16	2.44309e-17	7.87833e-13	3.44882e-14	7.49541e-14	3.34341e-10	2.16732e-11	1.44216e-12	3.78577e-09	5.81578e-13	3.09551e-08	1.79304e-16	6.47012e-15	7.61377e-13	7.895e-13	1.48453e-10	8.45337e-08	1.96964e-13	2.90261e-12	4.52437e-11	4.33996e-13	1.19224e-14	4.32142e-10	7.05027e-13	2.84007e-13	1.55089e-12	9.53713e-09	9.44486e-09	1.23099e-11	4.68921e-12	8.5849e-11	1921.67	0.000235446	0.000430788	0.000424853	4.69669e-05	0.000500702	0.0797104	1.55461	0.00338993	0.0723357	0.700818	6.63363e-06	0.00566852	0.015532	416.501	0.00164182
6.2535e-13	1.28639e-12	1.06185e-14	9.85747e-16	2.44309e-17	7.87833e-13	3.44882e-14	7.49541e-14	3.34341e-10	2.16732e-11	1.44216e-12	3.78577e-09	5.81578e-13	3.09551e-08	1.79304e-16	6.47012e-15	7.61377e-13	7.895e-13	1.48453e-10	8.45337e-08	1.96964e-13	2.90261e-12	4.52437e-11	4.33996e-13	1.19224e-14	4.32142e-10	7.05027e-13	2.84007e-13	1.55089e-12	9.53713e-09	9.44486e-09	1.23099e-11	4.68921e-12	8.5849e-11	1921.67	0.000235446	0.000430788	0.000424853	4.69669e-05	0.000500702	0.0797104	1.55461	0.00338993	0.0723357	0.700818	6.63363e-06	0.00566852	0.015532	416.501	0.00164182
6.2543e-13	3.77111e-12	1.61561e-14	1.17036e-15	2.65768e-17	7.80835e-13	4.7078e-14	9.43012e-14	2.97506e-10	2.75024e-11	1.41707e-12	7.66148e-09	3.76079e-13	2.52213e-08	1.18342e-16	7.38437e-15	8.7631e-13	9.48965e-13	1.31849e-10	6.41971e-08	1.91901e-13	1.4951e-12	5.47516e-11	4.48407e-13	1.1858e-14	3.73793e-10	7.55335e-13	2.77217e-13	1.62166e-12	1.05521e-08	1.18148e-08	1.77175e-11	5.40226e-12	8.15614e-11	2376.44	0.000242615	0.000423657	0.000252356	6.00342e-05	0.000646928	0.290138	0.644301	0.00399593	0.116114	0.8156	6.41898e-06	0.00772569	0.0181347	627.567	0.00235804
6.25514e-13	1.09809e-12	1.72837e-14	1.25056e-15	1.98353e-17	8.8817e-13	4.21194e-14	8.39246e-14	2.64155e-10	1.54739e-11	1.33515e-12	6.18674e-09	8.49331e-13	2.47618e-08	1.44719e-16	8.29064e-15	6.67517e-13	8.91755e-13	1.5106e-10	8.60623e-08	2.48123e-13	3.15933e-12	6.53847e-11	4.97191e-13	2.17419e-14	4.66177e-10	7.4712e-13	1.43281e-13	1.47206e-12	9.84658e-09	9.02653e-09	1.78414e-11	3.11866e-12	4.53301e-11	2589.86	0.000260846	0.000467974	0.000271381	2.82783e-05	0.000739527	0.0658706	1.96061	0.00274385	0.0890219	1.72615	7.444e-06	0.00858069	0.0132558	189.069	0.0015828
6.2535e-13	1.28639e-12	1.06185e-14	9.85747e-16	2.44309e-17	7.87833e-13	3.44882e-14	7.49541e-14	3.34341e-10	2.16732e-11	1.44216e-12	3.78577e-09	5.81578e-13	3.09551e-08	1.79304e-16	6.47012e-15	7.61377e-13	7.895e-13	1.48453e-10	8.45337e-08	1.96964e-13	2.90261e-12	4.52437e-11	4.33996e-13	1.19224e-14	4.32142e-10	7.05027e-13	2.84007e-13	1.55089e-12	9.53713e-09	9.44486e-09	1.23099e-11	4.68921e-12	8.5849e-11	1921.67	0.000235446	0.000430788	0.000424853	4.69669e-05	0.000500702	0.0797104	1.55461	0.00338993	0.0723357	0.700818	6.63363e-06	0.00566852	0.015532	416.501	0.00164182
6.2535e-13	1.28639e-12	1.06185e-14	9.85747e-16	2.44309e-17	7.87833e-13	3.44882e-14	7.49541e-14	3.34341e-10	2.16732e-11	1.44216e-12	3.78577e-09	5.81578e-13	3.09551e-08	1.79304e-16	6.47012e-15	7.61377e-13	7.895e-13	1.48453e-10	8.45337e-08	1.96964e-13	2.90261e-12	4.52437e-11	4.33996e-13	1.19224e-14	4.32142e-10	7.05027e-13	2.84007e-13	1.55089e-12	9.53713e-09	9.44486e-09	1.23099e-11	4.68921e-12	8.5849e-11	1921.67	0.000235446	0.000430788	0.000424853	4.69669e-05	0.000500702	0.0797104	1.55461	0.00338993	0.0723357	0.700818	6.63363e-06	0.00566852	0.015532	416.501	0.00164182
6.2535e-13	1.28639e-12	1.06185e-14	9.85747e-16	2.44309e-17	7.87833e-13	3.44882e-14	7.49541e-14	3.34341e-10	2.16732e-11	1.44216e-12	3.78577e-09	5.81578e-13	3.09551e-08	1.79304e-16	6.47012e-15	7.61377e-13	7.895e-13	1.48453e-10	8.45337e-08	1.96964e-13	2.90261e-12	4.52437e-11	4.33996e-13	1.19224e-14	4.32142e-10	7.05027e-13	2.84007e-13	1.55089e-12	9.53713e-09	9.44486e-09	1.23099e-11	4.68921e-12	8.5849e-11	1921.67	0.000235446	0.000430788	0.000424853	4.69669e-05	0.000500702	0.0797104	1.55461	0.00338993	0.0723357	0.700818	6.63363e-06	0.00566852	0.015532	416.501	0.00164182
6.2535e-13	1.28639e-12	1.06185e-14	9.85747e-16	2.44309e-17	7.87833e-13	3.44882e-14	7.49541e-14	3.34341e-10	2.16732e-11	1.44216e-12	3.78577e-09	5.81578e-13	3.09551e-08	1.79304e-16	6.47012e-15	7.61377e-13	7.895e-13	1.48453e-10	8.45337e-08	1.96964e-13	2.90261e-12	4.52437e-11	4.33996e-13	1.19224e-14	4.32142e-10	7.05027e-13	2.84007e-13	1.55089e-12	9.53713e-09	9.44486e-09	1.23099e-11	4.68921e-12	8.5849e-11	1921.67	0.000235446	0.000430788	0.000424853	4.69669e-05	0.000500702	0.0797104	1.55461	0.00338993	0.0723357	0.700818	6.63363e-06	0.00566852	0.015532	416.501	0.00164182
6.2535e-13	1.28639e-12	1.06185e-14	9.85747e-16	2.44309e-17	7.87833e-13	3.44882e-14	7.49541e-14	3.34341e-10	2.16732e-11	1.44216e-12	3.78577e-09	5.81578e-13	3.09551e-08	1.79304e-16	6.47012e-15	7.61377e-13	7.895e-13	1.48453e-10	8.45337e-08	1.96964e-13	2.90261e-12	4.52437e-11	4.33996e-13	1.19224e-14	4.32142e-10	7.05027e-13	2.84007e-13	1.55089e-12	9.53713e-09	9.44486e-09	1.23099e-11	4.68921e-12	8.5849e-11	1921.67	0.000235446	0.000430788	0.000424853	4.69669e-05	0.000500702	0.0797104	1.55461	0.00338993	0.0723357	0.700818	6.63363e-06	0.00566852	0.015532	416.501	0.00164182
6.2535e-13	1.28639e-12	1.06185e-14	9.85747e-16	2.44309e-17	7.87833e-13	3.44882e-14	7.49541e-14	3.34341e-10	2.16732e-11	1.44216e-12	3.78577e-09	5.81578e-13	3.09551e-08	1.79304e-16	6.47012e-15	7.61377e-13	7.895e-13	1.48453e-10	8.45337e-08	1.96964e-13	2.90261e-12	4.52437e-11	4.33996e-13	1.19224e-14	4.32142e-10	7.05027e-13	2.84007e-13	1.55089e-12	9.53713e-09	9.44486e-09	1.23099e-11	4.68921e-12	8.5849e-11	1921.67	0.000235446	0.000430788	0.000424853	4.69669e-05	0.000500702	0.0797104	1.55461	0.00338993	0.0723357	0.700818	6.63363e-06	0.00566852	0.015532	416.501	0.00164182
6.2535e-13	1.28639e-12	1.06185e-14	9.85747e-16	2.44309e-17	7.87833e-13	3.44882e-14	7.49541e-14	3.34341e-10	2.16732e-11	1.44216e-12	3.78577e-09	5.81578e-13	3.09551e-08	1.79304e-16	6.47012e-15	7.61377e-13	7.895e-13	1.48453e-10	8.45337e-08	1.96964e-13	2.90261e-12	4.52437e-11	4.33996e-13	1.19224e-14	4.32142e-10	7.05027e-13	2.84007e-13	1.55089e-12	9.53713e-09	9.44486e-09	1.23099e-11	4.68921e-12	8.5849e-11	1921.67	0.000235446	0.000430788	0.000424853	4.69669e-05	0.000500702	0.0797104	1.55461	0.00338993	0.0723357	0.700818	6.63363e-06	0.00566852	0.015532	416.501	0.00164182
6.2535e-13	1.28639e-12	1.06185e-14	9.85747e-16	2.44309e-17	7.87833e-13	3.44882e-14	7.49541e-14	3.34341e-10	2.16732e-11	1.44216e-12	3.78577e-09	5.81578e-13	3.09551e-08	1.79304e-16	6.47012e-15	7.61377e-13	7.895e-13	1.48453e-10	8.45337e-08	1.96964e-13	2.90261e-12	4.52437e-11	4.33996e-13	1.19224e-14	4.32142e-10	7.05027e-13	2.84007e-13	1.55089e-12	9.53713e-09	9.44486e-09	1.23099e-11	4.68921e-12	8.5849e-11	1921.67	0.000235446	0.000430788	0.000424853	4.69669e-05	0.000500702	0.0797104	1.55461	0.00338993	0.0723357	0.700818	6.63363e-06	0.00566852	0.015532	416.501	0.00164182
6.2535e-13	1.28639e-12	1.06185e-14	9.85747e-16	2.44309e-17	7.87833e-13	3.44882e-14	7.49541e-14	3.34341e-10	2.16732e-11	1.44216e-12	3.78577e-09	5.81578e-13	3.09551e-08	1.79304e-16	6.47012e-15	7.61377e-13	7.895e-13	1.48453e-10	8.45337e-08	1.96964e-13	2.90261e-12	4.52437e-11	4.33996e-13	1.19224e-14	4.32142e-10	7.05027e-13	2.84007e-13	1.55089e-12	9.53713e-09	9.44486e-09	1.23099e-11	4.68921e-12	8.5849e-11	1921.67	0.000235446	0.000430788	0.000424853	4.69669e-05	0.000500702	0.0797104	1.55461	0.00338993	0.0723357	0.700818	6.63363e-06	0.00566852	0.015532	416.501	0.00164182
6.2535e-13	1.28639e-12	1.06185e-14	9.85747e-16	2.44309e-17	7.87833e-13	3.44882e-14	7.49541e-14	3.34341e-10	2.16732e-11	1.44216e-12	3.78577e-09	5.81578e-13	3.09551e-08	1.79304e-16	6.47012e-15	7.61377e-13	7.895e-13	1.48453e-10	8.45337e-08	1.96964e-13	2.90261e-12	4.52437e-11	4.33996e-13	1.19224e-14	4.32142e-10	7.05027e-13	2.84007e-13	1.55089e-12	9.53713e-09	9.44486e-09	1.23099e-11	4.68921e-12	8.5849e-11	1921.67	0.000235446	0.000430788	0.000424853	4.69669e-05	0.000500702	0.0797104	1.55461	0.00338993	0.0723357	0.700818	6.63363e-06	0.00566852	0.015532	416.501	0.00164182
6.2535e-13	1.28639e-12	1.06185e-14	9.85747e-16	2.44309e-17	7.87833e-13	3.44882e-14	7.49541e-14	3.34341e-10	2.16732e-11	1.44216e-12	3.78577e-09	5.81578e-13	3.09551e-08	1.79304e-16	6.47012e-15	7.61377e-13	7.895e-13	1.48453e-10	8.45337e-08	1.96964e-13	2.90261e-12	4.52437e-11	4.33996e-13	1.19224e-14	4.32142e-10	7.05027e-13	2.84007e-13	1.55089e-12	9.53713e-09	9.44486e-09	1.23099e-11	4.68921e-12	8.5849e-11	1921.67	0.000235446	0.000430788	0.000424853	4.69669e-05	0.000500702	0.0797104	1.55461	0.00338993	0.0723357	0.700818	6.63363e-06	0.00566852	0.015532	416.501	0.00164182
6.2535e-13	1.28639e-12	1.06185e-14	9.85747e-16	2.44309e-17	7.87833e-13	3.44882e-14	7.49541e-14	3.34341e-10	2.16732e-11	1.44216e-12	3.78577e-09	5.81578e-13	3.09551e-08	1.79304e-16	6.47012e-15	7.61377e-13	7.895e-13	1.48453e-10	8.45337e-08	1.96964e-13	2.90261e-12	4.52437e-11	4.33996e-13	1.19224e-14	4.32142e-10	7.05027e-13	2.84007e-13	1.55089e-12	9.53713e-09	9.44486e-09	1.23099e-11	4.68921e-12	8.5849e-11	1921.67	0.000235446	0.000430788	0.000424853	4.69669e-05	0.000500702	0.0797104	1.55461	0.00338993	0.0723357	0.700818	6.63363e-06	0.00566852	0.015532	416.501	0.00164182
6.23829e-13	1.14245e-12	1.36045e-14	1.70356e-15	1.49041e-17	7.59371e-13	3.3645e-14	1.06264e-13	3.40811e-10	2.81852e-11	1.28562e-12	5.12976e-09	3.56455e-13	1.21307e-08	9.12182e-16	4.37482e-15	6.07615e-13	6.63959e-13	8.15507e-11	6.70399e-08	1.60153e-13	4.20291e-12	5.50254e-11	3.90168e-13	7.44292e-15	3.58483e-10	6.23945e-13	1.87909e-13	1.37841e-12	7.98763e-09	6.86345e-09	1.33827e-11	3.60816e-12	7.36647e-11	2403.56	0.000216625	0.000447901	0.000547785	4.30716e-05	0.000373499	0.0848771	2.56359	0.00392055	0.163083	0.723859	5.05249e-06	0.00629358	0.0163099	148.16	0.00137631
6.2535e-13	1.28639e-12	1.06185e-14	9.85747e-16	2.44309e-17	7.87833e-13	3.44882e-14	7.49541e-14	3.34341e-10	2.16732e-11	1.44216e-12	3.78577e-09	5.81578e-13	3.09551e-08	1.79304e-16	6.47012e-15	7.61377e-13	7.895e-13	1.48453e-10	8.45337e-08	1.96964e-13	2.90261e-12	4.52437e-11	4.33996e-13	1.19224e-14	4.32142e-10	7.05027e-13	2.84007e-13	1.55089e-12	9.53713e-09	9.44486e-09	1.23099e-11	4.68921e-12	8.5849e-11	1921.67	0.000235446	0.000430788	0.000424853	4.69669e-05	0.000500702	0.0797104	1.55461	0.00338993	0.0723357	0.700818	6.63363e-06	0.00566852	0.015532	416.501	0.00164182
6.24382e-13	1.39434e-12	1.19996e-14	1.00166e-15	2.36043e-17	7.74941e-13	3.3756e-14	7.20119e-14	3.68666e-10	1.93513e-11	1.37615e-12	3.67698e-09	3.37362e-13	4.23132e-08	1.48281e-16	4.81842e-15	8.10618e-13	8.2514e-13	1.83107e-10	6.84816e-08	2.414e-13	2.94918e-12	7.4026e-11	4.66524e-13	7.76271e-15	3.983e-10	7.09465e-13	2.35657e-13	1.49189e-12	8.161e-09	1.52498e-08	9.03529e-12	4.64368e-12	1.24364e-10	2228.8	0.000223818	0.000444179	0.000328346	5.80588e-05	0.000483105	0.109629	1.64437	0.00341392	0.100664	0.426436	7.31964e-06	0.00554556	0.0241991	257.12	0.00177731
6.2535e-13	1.28639e-12	1.06185e-14	9.85747e-16	2.44309e-17	7.87833e-13	3.44882e-14	7.49541e-14	3.34341e-10	2.16732e-11	1.44216e-12	3.78577e-09	5.81578e-13	3.09551e-08	1.79304e-16	6.47012e-15	7.61377e-13	7.895e-13	1.48453e-10	8.45337e-08	1.96964e-13	2.90261e-12	4.52437e-11	4.33996e-13	1.19224e-14	4.32142e-10	7.05027e-13	2.84007e-13	1.55089e-12	9.53713e-09	9.44486e-09	1.23099e-11	4.68921e-12	8.5849e-11	1921.67	0.000235446	0.000430788	0.000424853	4.69669e-05	0.000500702	0.0797104	1.55461	0.00338993	0.0723357	0.700818	6.63363e-06	0.00566852	0.015532	416.501	0.00164182
6.2535e-13	1.28639e-12	1.06185e-14	9.85747e-16	2.44309e-17	7.87833e-13	3.44882e-14	7.49541e-14	3.34341e-10	2.16732e-11	1.44216e-12	3.78577e-09	5.81578e-13	3.09551e-08	1.79304e-16	6.47012e-15	7.61377e-13	7.895e-13	1.48453e-10	8.45337e-08	1.96964e-13	2.90261e-12	4.52437e-11	4.33996e-13	1.19224e-14	4.32142e-10	7.05027e-13	2.84007e-13	1.55089e-12	9.53713e-09	9.44486e-09	1.23099e-11	4.68921e-12	8.5849e-11	1921.67	0.000235446	0.000430788	0.000424853	4.69669e-05	0.000500702	0.0797104	1.55461	0.00338993	0.0723357	0.700818	6.63363e-06	0.00566852	0.015532	416.501	0.00164182
6.2535e-13	1.28639e-12	1.06185e-14	9.85747e-16	2.44309e-17	7.87833e-13	3.44882e-14	7.49541e-14	3.34341e-10	2.16732e-11	1.44216e-12	3.78577e-09	5.81578e-13	3.09551e-08	1.79304e-16	6.47012e-15	7.61377e-13	7.895e-13	1.48453e-10	8.45337e-08	1.96964e-13	2.90261e-12	4.52437e-11	4.33996e-13	1.19224e-14	4.32142e-10	7.05027e-13	2.84007e-13	1.55089e-12	9.53713e-09	9.44486e-09	1.23099e-11	4.68921e-12	8.5849e-11	1921.67	0.000235446	0.000430788	0.000424853	4.69669e-05	0.000500702	0.0797104	1.55461	0.00338993	0.0723357	0.700818	6.63363e-06	0.00566852	0.015532	416.501	0.00164182
6.2535e-13	1.28639e-12	1.06185e-14	9.85747e-16	2.44309e-17	7.87833e-13	3.44882e-14	7.49541e-14	3.34341e-10	2.16732e-11	1.44216e-12	3.78577e-09	5.81578e-13	3.09551e-08	1.79304e-16	6.47012e-15	7.61377e-13	7.895e-13	1.48453e-10	8.45337e-08	1.96964e-13	2.90261e-12	4.52437e-11	4.33996e-13	1.19224e-14	4.32142e-10	7.05027e-13	2.84007e-13	1.55089e-12	9.53713e-09	9.44486e-09	1.23099e-11	4.68921e-12	8.5849e-11	1921.67	0.000235446	0.000430788	0.000424853	4.69669e-05	0.000500702	0.0797104	1.55461	0.00338993	0.0723357	0.700818	6.63363e-06	0.00566852	0.015532	416.501	0.00164182
6.2535e-13	1.28639e-12	1.06185e-14	9.85747e-16	2.44309e-17	7.87833e-13	3.44882e-14	7.49541e-14	3.34341e-10	2.16732e-11	1.44216e-12	3.78577e-09	5.81578e-13	3.09551e-08	1.79304e-16	6.47012e-15	7.61377e-13	7.895e-13	1.48453e-10	8.45337e-08	1.96964e-13	2.90261e-12	4.52437e-11	4.33996e-13	1.19224e-14	4.32142e-10	7.05027e-13	2.84007e-13	1.55089e-12	9.53713e-09	9.44486e-09	1.23099e-11	4.68921e-12	8.5849e-11	1921.67	0.000235446	0.000430788	0.000424853	4.69669e-05	0.000500702	0.0797104	1.55461	0.00338993	0.0723357	0.700818	6.63363e-06	0.00566852	0.015532	416.501	0.00164182
6.2535e-13	1.28639e-12	1.06185e-14	9.85747e-16	2.44309e-17	7.87833e-13	3.44882e-14	7.49541e-14	3.34341e-10	2.16732e-11	1.44216e-12	3.78577e-09	5.81578e-13	3.09551e-08	1.79304e-16	6.47012e-15	7.61377e-13	7.895e-13	1.48453e-10	8.45337e-08	1.96964e-13	2.90261e-12	4.52437e-11	4.33996e-13	1.19224e-14	4.32142e-10	7.05027e-13	2.84007e-13	1.55089e-12	9.53713e-09	9.44486e-09	1.23099e-11	4.68921e-12	8.5849e-11	1921.67	0.000235446	0.000430788	0.000424853	4.69669e-05	0.000500702	0.0797104	1.55461	0.00338993	0.0723357	0.700818	6.63363e-06	0.00566852	0.015532	416.501	0.00164182
6.2535e-13	1.28639e-12	1.06185e-14	9.85747e-16	2.44309e-17	7.87833e-13	3.44882e-14	7.49541e-14	3.34341e-10	2.16732e-11	1.44216e-12	3.78577e-09	5.81578e-13	3.09551e-08	1.79304e-16	6.47012e-15	7.61377e-13	7.895e-13	1.48453e-10	8.45337e-08	1.96964e-13	2.90261e-12	4.52437e-11	4.33996e-13	1.19224e-14	4.32142e-10	7.05027e-13	2.84007e-13	1.55089e-12	9.53713e-09	9.44486e-09	1.23099e-11	4.68921e-12	8.5849e-11	1921.67	0.000235446	0.000430788	0.000424853	4.69669e-05	0.000500702	0.0797104	1.55461	0.00338993	0.0723357	0.700818	6.63363e-06	0.00566852	0.015532	416.501	0.00164182
6.2535e-13	1.28639e-12	1.06185e-14	9.85747e-16	2.44309e-17	7.87833e-13	3.44882e-14	7.49541e-14	3.34341e-10	2.16732e-11	1.44216e-12	3.78577e-09	5.81578e-13	3.09551e-08	1.79304e-16	6.47012e-15	7.61377e-13	7.895e-13	1.48453e-10	8.45337e-08	1.96964e-13	2.90261e-12	4.52437e-11	4.33996e-13	1.19224e-14	4.32142e-10	7.05027e-13	2.84007e-13	1.55089e-12	9.53713e-09	9.44486e-09	1.23099e-11	4.68921e-12	8.5849e-11	1921.67	0.000235446	0.000430788	0.000424853	4.69669e-05	0.000500702	0.0797104	1.55461	0.00338993	0.0723357	0.700818	6.63363e-06	0.00566852	0.015532	416.501	0.00164182
6.2535e-13	1.28639e-12	1.06185e-14	9.85747e-16	2.44309e-17	7.87833e-13	3.44882e-14	7.49541e-14	3.34341e-10	2.16732e-11	1.44216e-12	3.78577e-09	5.81578e-13	3.09551e-08	1.79304e-16	6.47012e-15	7.61377e-13	7.895e-13	1.48453e-10	8.45337e-08	1.96964e-13	2.90261e-12	4.52437e-11	4.33996e-13	1.19224e-14	4.32142e-10	7.05027e-13	2.84007e-13	1.55089e-12	9.53713e-09	9.44486e-09	1.23099e-11	4.68921e-12	8.5849e-11	1921.67	0.000235446	0.000430788	0.000424853	4.69669e-05	0.000500702	0.0797104	1.55461	0.00338993	0.0723357	0.700818	6.63363e-06	0.00566852	0.015532	416.501	0.00164182
6.2535e-13	1.28639e-12	1.06185e-14	9.85747e-16	2.44309e-17	7.87833e-13	3.44882e-14	7.49541e-14	3.34341e-10	2.16732e-11	1.44216e-12	3.78577e-09	5.81578e-13	3.09551e-08	1.79304e-16	6.47012e-15	7.61377e-13	7.895e-13	1.48453e-10	8.45337e-08	1.96964e-13	2.90261e-12	4.52437e-11	4.33996e-13	1.19224e-14	4.32142e-10	7.05027e-13	2.84007e-13	1.55089e-12	9.53713e-09	9.44486e-09	1.23099e-11	4.68921e-12	8.5849e-11	1921.67	0.000235446	0.000430788	0.000424853	4.69669e-05	0.000500702	0.0797104	1.55461	0.00338993	0.0723357	0.700818	6.63363e-06	0.00566852	0.015532	416.501	0.00164182
6.26025e-13	1.16792e-12	2.83191e-14	7.69335e-16	3.77031e-17	6.66618e-13	2.74648e-14	8.18235e-14	2.43787e-10	3.24944e-11	1.28712e-12	6.40353e-09	2.83238e-13	1.12229e-08	7.964e-17	3.78928e-15	1.3484e-12	7.16848e-13	2.12952e-10	8.27915e-08	2.31523e-13	1.74973e-12	4.49376e-11	3.2839e-13	1.30798e-14	5.7045e-10	6.84406e-13	1.76666e-13	1.63178e-12	1.17037e-08	1.58799e-08	1.01601e-11	5.25551e-12	6.25822e-11	404.747	0.00021588	0.000425225	0.000545398	3.26936e-05	0.000831041	0.0976375	2.53352	0.00324492	0.034015	0.614688	4.99722e-06	0.00343265	0.01693	596.925	0.00192124
6.2535e-13	1.28639e-12	1.06185e-14	9.85747e-16	2.44309e-17	7.87833e-13	3.44882e-14	7.49541e-14	3.34341e-10	2.16732e-11	1.44216e-12	3.78577e-09	5.81578e-13	3.09551e-08	1.79304e-16	6.47012e-15	7.61377e-13	7.895e-13	1.48453e-10	8.45337e-08	1.96964e-13	2.90261e-12	4.52437e-11	4.33996e-13	1.19224e-14	4.32142e-10	7.05027e-13	2.84007e-13	1.55089e-12	9.53713e-09	9.44486e-09	1.23099e-11	4.68921e-12	8.5849e-11	1921.67	0.000235446	0.000430788	0.000424853	4.69669e-05	0.000500702	0.0797104	1.55461	0.00338993	0.0723357	0.700818	6.63363e-06	0.00566852	0.015532	416.501	0.00164182
6.2535e-13	1.28639e-12	1.06185e-14	9.85747e-16	2.44309e-17	7.87833e-13	3.44882e-14	7.49541e-14	3.34341e-10	2.16732e-11	1.44216e-12	3.78577e-09	5.81578e-13	3.09551e-08	1.79304e-16	6.47012e-15	7.61377e-13	7.895e-13	1.48453e-10	8.45337e-08	1.96964e-13	2.90261e-12	4.52437e-11	4.33996e-13	1.19224e-14	4.32142e-10	7.05027e-13	2.84007e-13	1.55089e-12	9.53713e-09	9.44486e-09	1.23099e-11	4.68921e-12	8.5849e-11	1921.67	0.000235446	0.000430788	0.000424853	4.69669e-05	0.000500702	0.0797104	1.55461	0.00338993	0.0723357	0.700818	6.63363e-06	0.00566852	0.015532	416.501	0.00164182
6.2535e-13	1.28639e-12	1.06185e-14	9.85747e-16	2.44309e-17	7.87833e-13	3.44882e-14	7.49541e-14	3.34341e-10	2.16732e-11	1.44216e-12	3.78577e-09	5.81578e-13	3.09551e-08	1.79304e-16	6.47012e-15	7.61377e-13	7.895e-13	1.48453e-10	8.45337e-08	1.96964e-13	2.90261e-12	4.52437e-11	4.33996e-13	1.19224e-14	4.32142e-10	7.05027e-13	2.84007e-13	1.55089e-12	9.53713e-09	9.44486e-09	1.23099e-11	4.68921e-12	8.5849e-11	1921.67	0.000235446	0.000430788	0.000424853	4.69669e-05	0.000500702	0.0797104	1.55461	0.00338993	0.0723357	0.700818	6.63363e-06	0.00566852	0.015532	416.501	0.00164182
6.2535e-13	1.28639e-12	1.06185e-14	9.85747e-16	2.44309e-17	7.87833e-13	3.44882e-14	7.49541e-14	3.34341e-10	2.16732e-11	1.44216e-12	3.78577e-09	5.81578e-13	3.09551e-08	1.79304e-16	6.47012e-15	7.61377e-13	7.895e-13	1.48453e-10	8.45337e-08	1.96964e-13	2.90261e-12	4.52437e-11	4.33996e-13	1.19224e-14	4.32142e-10	7.05027e-13	2.84007e-13	1.55089e-12	9.53713e-09	9.44486e-09	1.23099e-11	4.68921e-12	8.5849e-11	1921.67	0.000235446	0.000430788	0.000424853	4.69669e-05	0.000500702	0.0797104	1.55461	0.00338993	0.0723357	0.700818	6.63363e-06	0.00566852	0.015532	416.501	0.00164182
6.2535e-13	1.28639e-12	1.06185e-14	9.85747e-16	2.44309e-17	7.87833e-13	3.44882e-14	7.49541e-14	3.34341e-10	2.16732e-11	1.44216e-12	3.78577e-09	5.81578e-13	3.09551e-08	1.79304e-16	6.47012e-15	7.61377e-13	7.895e-13	1.48453e-10	8.45337e-08	1.96964e-13	2.90261e-12	4.52437e-11	4.33996e-13	1.19224e-14	4.32142e-10	7.05027e-13	2.84007e-13	1.55089e-12	9.53713e-09	9.44486e-09	1.23099e-11	4.68921e-12	8.5849e-11	1921.67	0.000235446	0.000430788	0.000424853	4.69669e-05	0.000500702	0.0797104	1.55461	0.00338993	0.0723357	0.700818	6.63363e-06	0.00566852	0.015532	416.501	0.00164182
6.2535e-13	1.28639e-12	1.06185e-14	9.85747e-16	2.44309e-17	7.87833e-13	3.44882e-14	7.49541e-14	3.34341e-10	2.16732e-11	1.44216e-12	3.78577e-09	5.81578e-13	3.09551e-08	1.79304e-16	6.47012e-15	7.61377e-13	7.895e-13	1.48453e-10	8.45337e-08	1.96964e-13	2.90261e-12	4.52437e-11	4.33996e-13	1.19224e-14	4.32142e-10	7.05027e-13	2.84007e-13	1.55089e-12	9.53713e-09	9.44486e-09	1.23099e-11	4.68921e-12	8.5849e-11	1921.67	0.000235446	0.000430788	0.000424853	4.69669e-05	0.000500702	0.0797104	1.55461	0.00338993	0.0723357	0.700818	6.63363e-06	0.00566852	0.015532	416.501	0.00164182
6.2535e-13	1.28639e-12	1.06185e-14	9.85747e-16	2.44309e-17	7.87833e-13	3.44882e-14	7.49541e-14	3.34341e-10	2.16732e-11	1.44216e-12	3.78577e-09	5.81578e-13	3.09551e-08	1.79304e-16	6.47012e-15	7.61377e-13	7.895e-13	1.48453e-10	8.45337e-08	1.96964e-13	2.90261e-12	4.52437e-11	4.33996e-13	1.19224e-14	4.32142e-10	7.05027e-13	2.84007e-13	1.55089e-12	9.53713e-09	9.44486e-09	1.23099e-11	4.68921e-12	8.5849e-11	1921.67	0.000235446	0.000430788	0.000424853	4.69669e-05	0.000500702	0.0797104	1.55461	0.00338993	0.0723357	0.700818	6.63363e-06	0.00566852	0.015532	416.501	0.00164182
6.2535e-13	1.28639e-12	1.06185e-14	9.85747e-16	2.44309e-17	7.87833e-13	3.44882e-14	7.49541e-14	3.34341e-10	2.16732e-11	1.44216e-12	3.78577e-09	5.81578e-13	3.09551e-08	1.79304e-16	6.47012e-15	7.61377e-13	7.895e-13	1.48453e-10	8.45337e-08	1.96964e-13	2.90261e-12	4.52437e-11	4.33996e-13	1.19224e-14	4.32142e-10	7.05027e-13	2.84007e-13	1.55089e-12	9.53713e-09	9.44486e-09	1.23099e-11	4.68921e-12	8.5849e-11	1921.67	0.000235446	0.000430788	0.000424853	4.69669e-05	0.000500702	0.0797104	1.55461	0.00338993	0.0723357	0.700818	6.63363e-06	0.00566852	0.015532	416.501	0.00164182
6.2535e-13	1.28639e-12	1.06185e-14	9.85747e-16	2.44309e-17	7.87833e-13	3.44882e-14	7.49541e-14	3.34341e-10	2.16732e-11	1.44216e-12	3.78577e-09	5.81578e-13	3.09551e-08	1.79304e-16	6.47012e-15	7.61377e-13	7.895e-13	1.48453e-10	8.45337e-08	1.96964e-13	2.90261e-12	4.52437e-11	4.33996e-13	1.19224e-14	4.32142e-10	7.05027e-13	2.84007e-13	1.55089e-12	9.53713e-09	9.44486e-09	1.23099e-11	4.68921e-12	8.5849e-11	1921.67	0.000235446	0.000430788	0.000424853	4.69669e-05	0.000500702	0.0797104	1.55461	0.00338993	0.0723357	0.700818	6.63363e-06	0.00566852	0.015532	416.501	0.00164182
6.2535e-13	1.28639e-12	1.06185e-14	9.85747e-16	2.44309e-17	7.87833e-13	3.44882e-14	7.49541e-14	3.34341e-10	2.16732e-11	1.44216e-12	3.78577e-09	5.81578e-13	3.09551e-08	1.79304e-16	6.47012e-15	7.61377e-13	7.895e-13	1.48453e-10	8.45337e-08	1.96964e-13	2.90261e-12	4.52437e-11	4.33996e-13	1.19224e-14	4.32142e-10	7.05027e-13	2.84007e-13	1.55089e-12	9.53713e-09	9.44486e-09	1.23099e-11	4.68921e-12	8.5849e-11	1921.67	0.000235446	0.000430788	0.000424853	4.69669e-05	0.000500702	0.0797104	1.55461	0.00338993	0.0723357	0.700818	6.63363e-06	0.00566852	0.015532	416.501	0.00164182
6.2535e-13	1.28639e-12	1.06185e-14	9.85747e-16	2.44309e-17	7.87833e-13	3.44882e-14	7.49541e-14	3.34341e-10	2.16732e-11	1.44216e-12	3.78577e-09	5.81578e-13	3.09551e-08	1.79304e-16	6.47012e-15	7.61377e-13	7.895e-13	1.48453e-10	8.45337e-08	1.96964e-13	2.90261e-12	4.52437e-11	4.33996e-13	1.19224e-14	4.32142e-10	7.05027e-13	2.84007e-13	1.55089e-12	9.53713e-09	9.44486e-09	1.23099e-11	4.68921e-12	8.5849e-11	1921.67	0.000235446	0.000430788	0.000424853	4.69669e-05	0.000500702	0.0797104	1.55461	0.00338993	0.0723357	0.700818	6.63363e-06	0.00566852	0.015532	416.501	0.00164182
6.21379e-13	1.19549e-12	1.32967e-14	1.1884e-15	2.34505e-17	7.33355e-13	4.74464e-14	8.81512e-14	3.24221e-10	2.33566e-11	1.26658e-12	1.76741e-09	6.78911e-13	2.32011e-08	4.61948e-16	5.41243e-15	6.99065e-13	7.82719e-13	1.24956e-10	6.8616e-08	1.79539e-13	2.85539e-12	4.90816e-11	4.71768e-13	1.03937e-14	4.30049e-10	7.33216e-13	1.73463e-13	1.50196e-12	6.69951e-09	8.44643e-09	1.09621e-11	3.25316e-12	1.55163e-10	1935.8	0.000209659	0.000437203	0.000406238	2.78109e-05	0.000689361	0.0620497	1.43391	0.0058711	0.0476349	0.718941	8.36183e-06	0.00531397	0.0108682	119.961	0.00111309
6.2535e-13	1.28639e-12	1.06185e-14	9.85747e-16	2.44309e-17	7.87833e-13	3.44882e-14	7.49541e-14	3.34341e-10	2.16732e-11	1.44216e-12	3.78577e-09	5.81578e-13	3.09551e-08	1.79304e-16	6.47012e-15	7.61377e-13	7.895e-13	1.48453e-10	8.45337e-08	1.96964e-13	2.90261e-12	4.52437e-11	4.33996e-13	1.19224e-14	4.32142e-10	7.05027e-13	2.84007e-13	1.55089e-12	9.53713e-09	9.44486e-09	1.23099e-11	4.68921e-12	8.5849e-11	1921.67	0.000235446	0.000430788	0.000424853	4.69669e-05	0.000500702	0.0797104	1.55461	0.00338993	0.0723357	0.700818	6.63363e-06	0.00566852	0.015532	416.501	0.00164182
6.2535e-13	1.28639e-12	1.06185e-14	9.85747e-16	2.44309e-17	7.87833e-13	3.44882e-14	7.49541e-14	3.34341e-10	2.16732e-11	1.44216e-12	3.78577e-09	5.81578e-13	3.09551e-08	1.79304e-16	6.47012e-15	7.61377e-13	7.895e-13	1.48453e-10	8.45337e-08	1.96964e-13	2.90261e-12	4.52437e-11	4.33996e-13	1.19224e-14	4.32142e-10	7.05027e-13	2.84007e-13	1.55089e-12	9.53713e-09	9.44486e-09	1.23099e-11	4.68921e-12	8.5849e-11	1921.67	0.000235446	0.000430788	0.000424853	4.69669e-05	0.000500702	0.0797104	1.55461	0.00338993	0.0723357	0.700818	6.63363e-06	0.00566852	0.015532	416.501	0.00164182
6.2535e-13	1.28639e-12	1.06185e-14	9.85747e-16	2.44309e-17	7.87833e-13	3.44882e-14	7.49541e-14	3.34341e-10	2.16732e-11	1.44216e-12	3.78577e-09	5.81578e-13	3.09551e-08	1.79304e-16	6.47012e-15	7.61377e-13	7.895e-13	1.48453e-10	8.45337e-08	1.96964e-13	2.90261e-12	4.52437e-11	4.33996e-13	1.19224e-14	4.32142e-10	7.05027e-13	2.84007e-13	1.55089e-12	9.53713e-09	9.44486e-09	1.23099e-11	4.68921e-12	8.5849e-11	1921.67	0.000235446	0.000430788	0.000424853	4.69669e-05	0.000500702	0.0797104	1.55461	0.00338993	0.0723357	0.700818	6.63363e-06	0.00566852	0.015532	416.501	0.00164182
6.2535e-13	1.28639e-12	1.06185e-14	9.85747e-16	2.44309e-17	7.87833e-13	3.44882e-14	7.49541e-14	3.34341e-10	2.16732e-11	1.44216e-12	3.78577e-09	5.81578e-13	3.09551e-08	1.79304e-16	6.47012e-15	7.61377e-13	7.895e-13	1.48453e-10	8.45337e-08	1.96964e-13	2.90261e-12	4.52437e-11	4.33996e-13	1.19224e-14	4.32142e-10	7.05027e-13	2.84007e-13	1.55089e-12	9.53713e-09	9.44486e-09	1.23099e-11	4.68921e-12	8.5849e-11	1921.67	0.000235446	0.000430788	0.000424853	4.69669e-05	0.000500702	0.0797104	1.55461	0.00338993	0.0723357	0.700818	6.63363e-06	0.00566852	0.015532	416.501	0.00164182
6.2535e-13	1.28639e-12	1.06185e-14	9.85747e-16	2.44309e-17	7.87833e-13	3.44882e-14	7.49541e-14	3.34341e-10	2.16732e-11	1.44216e-12	3.78577e-09	5.81578e-13	3.09551e-08	1.79304e-16	6.47012e-15	7.61377e-13	7.895e-13	1.48453e-10	8.45337e-08	1.96964e-13	2.90261e-12	4.52437e-11	4.33996e-13	1.19224e-14	4.32142e-10	7.05027e-13	2.84007e-13	1.55089e-12	9.53713e-09	9.44486e-09	1.23099e-11	4.68921e-12	8.5849e-11	1921.67	0.000235446	0.000430788	0.000424853	4.69669e-05	0.000500702	0.0797104	1.55461	0.00338993	0.0723357	0.700818	6.63363e-06	0.00566852	0.015532	416.501	0.00164182
6.2535e-13	1.28639e-12	1.06185e-14	9.85747e-16	2.44309e-17	7.87833e-13	3.44882e-14	7.49541e-14	3.34341e-10	2.16732e-11	1.44216e-12	3.78577e-09	5.81578e-13	3.09551e-08	1.79304e-16	6.47012e-15	7.61377e-13	7.895e-13	1.48453e-10	8.45337e-08	1.96964e-13	2.90261e-12	4.52437e-11	4.33996e-13	1.19224e-14	4.32142e-10	7.05027e-13	2.84007e-13	1.55089e-12	9.53713e-09	9.44486e-09	1.23099e-11	4.68921e-12	8.5849e-11	1921.67	0.000235446	0.000430788	0.000424853	4.69669e-05	0.000500702	0.0797104	1.55461	0.00338993	0.0723357	0.700818	6.63363e-06	0.00566852	0.015532	416.501	0.00164182
6.2535e-13	1.28639e-12	1.06185e-14	9.85747e-16	2.44309e-17	7.87833e-13	3.44882e-14	7.49541e-14	3.34341e-10	2.16732e-11	1.44216e-12	3.78577e-09	5.81578e-13	3.09551e-08	1.79304e-16	6.47012e-15	7.61377e-13	7.895e-13	1.48453e-10	8.45337e-08	1.96964e-13	2.90261e-12	4.52437e-11	4.33996e-13	1.19224e-14	4.32142e-10	7.05027e-13	2.84007e-13	1.55089e-12	9.53713e-09	9.44486e-09	1.23099e-11	4.68921e-12	8.5849e-11	1921.67	0.000235446	0.000430788	0.000424853	4.69669e-05	0.000500702	0.0797104	1.55461	0.00338993	0.0723357	0.700818	6.63363e-06	0.00566852	0.015532	416.501	0.00164182
6.2535e-13	1.28639e-12	1.06185e-14	9.85747e-16	2.44309e-17	7.87833e-13	3.44882e-14	7.49541e-14	3.34341e-10	2.16732e-11	1.44216e-12	3.78577e-09	5.81578e-13	3.09551e-08	1.79304e-16	6.47012e-15	7.61377e-13	7.895e-13	1.48453e-10	8.45337e-08	1.96964e-13	2.90261e-12	4.52437e-11	4.33996e-13	1.19224e-14	4.32142e-10	7.05027e-13	2.84007e-13	1.55089e-12	9.53713e-09	9.44486e-09	1.23099e-11	4.68921e-12	8.5849e-11	1921.67	0.000235446	0.000430788	0.000424853	4.69669e-05	0.000500702	0.0797104	1.55461	0.00338993	0.0723357	0.700818	6.63363e-06	0.00566852	0.015532	416.501	0.00164182
6.2535e-13	1.28639e-12	1.06185e-14	9.85747e-16	2.44309e-17	7.87833e-13	3.44882e-14	7.49541e-14	3.34341e-10	2.16732e-11	1.44216e-12	3.78577e-09	5.81578e-13	3.09551e-08	1.79304e-16	6.47012e-15	7.61377e-13	7.895e-13	1.48453e-10	8.45337e-08	1.96964e-13	2.90261e-12	4.52437e-11	4.33996e-13	1.19224e-14	4.32142e-10	7.05027e-13	2.84007e-13	1.55089e-12	9.53713e-09	9.44486e-09	1.23099e-11	4.68921e-12	8.5849e-11	1921.67	0.000235446	0.000430788	0.000424853	4.69669e-05	0.000500702	0.0797104	1.55461	0.00338993	0.0723357	0.700818	6.63363e-06	0.00566852	0.015532	416.501	0.00164182
6.2535e-13	1.28639e-12	1.06185e-14	9.85747e-16	2.44309e-17	7.87833e-13	3.44882e-14	7.49541e-14	3.34341e-10	2.16732e-11	1.44216e-12	3.78577e-09	5.81578e-13	3.09551e-08	1.79304e-16	6.47012e-15	7.61377e-13	7.895e-13	1.48453e-10	8.45337e-08	1.96964e-13	2.90261e-12	4.52437e-11	4.33996e-13	1.19224e-14	4.32142e-10	7.05027e-13	2.84007e-13	1.55089e-12	9.53713e-09	9.44486e-09	1.23099e-11	4.68921e-12	8.5849e-11	1921.67	0.000235446	0.000430788	0.000424853	4.69669e-05	0.000500702	0.0797104	1.55461	0.00338993	0.0723357	0.700818	6.63363e-06	0.00566852	0.015532	416.501	0.00164182
6.2535e-13	1.28639e-12	1.06185e-14	9.85747e-16	2.44309e-17	7.87833e-13	3.44882e-14	7.49541e-14	3.34341e-10	2.16732e-11	1.44216e-12	3.78577e-09	5.81578e-13	3.09551e-08	1.79304e-16	6.47012e-15	7.61377e-13	7.895e-13	1.48453e-10	8.45337e-08	1.96964e-13	2.90261e-12	4.52437e-11	4.33996e-13	1.19224e-14	4.32142e-10	7.05027e-13	2.84007e-13	1.55089e-12	9.53713e-09	9.44486e-09	1.23099e-11	4.68921e-12	8.5849e-11	1921.67	0.000235446	0.000430788	0.000424853	4.69669e-05	0.000500702	0.0797104	1.55461	0.00338993	0.0723357	0.700818	6.63363e-06	0.00566852	0.015532	416.501	0.00164182
6.2535e-13	1.28639e-12	1.06185e-14	9.85747e-16	2.44309e-17	7.87833e-13	3.44882e-14	7.49541e-14	3.34341e-10	2.16732e-11	1.44216e-12	3.78577e-09	5.81578e-13	3.09551e-08	1.79304e-16	6.47012e-15	7.61377e-13	7.895e-13	1.48453e-10	8.45337e-08	1.96964e-13	2.90261e-12	4.52437e-11	4.33996e-13	1.19224e-14	4.32142e-10	7.05027e-13	2.84007e-13	1.55089e-12	9.53713e-09	9.44486e-09	1.23099e-11	4.68921e-12	8.5849e-11	1921.67	0.000235446	0.000430788	0.000424853	4.69669e-05	0.000500702	0.0797104	1.55461	0.00338993	0.0723357	0.700818	6.63363e-06	0.00566852	0.015532	416.501	0.00164182
6.2535e-13	1.28639e-12	1.06185e-14	9.85747e-16	2.44309e-17	7.87833e-13	3.44882e-14	7.49541e-14	3.34341e-10	2.16732e-11	1.44216e-12	3.78577e-09	5.81578e-13	3.09551e-08	1.79304e-16	6.47012e-15	7.61377e-13	7.895e-13	1.48453e-10	8.45337e-08	1.96964e-13	2.90261e-12	4.52437e-11	4.33996e-13	1.19224e-14	4.32142e-10	7.05027e-13	2.84007e-13	1.55089e-12	9.53713e-09	9.44486e-09	1.23099e-11	4.68921e-12	8.5849e-11	1921.67	0.000235446	0.000430788	0.000424853	4.69669e-05	0.000500702	0.0797104	1.55461	0.00338993	0.0723357	0.700818	6.63363e-06	0.00566852	0.015532	416.501	0.00164182
6.2535e-13	1.28639e-12	1.06185e-14	9.85747e-16	2.44309e-17	7.87833e-13	3.44882e-14	7.49541e-14	3.34341e-10	2.16732e-11	1.44216e-12	3.78577e-09	5.81578e-13	3.09551e-08	1.79304e-16	6.47012e-15	7.61377e-13	7.895e-13	1.48453e-10	8.45337e-08	1.96964e-13	2.90261e-12	4.52437e-11	4.33996e-13	1.19224e-14	4.32142e-10	7.05027e-13	2.84007e-13	1.55089e-12	9.53713e-09	9.44486e-09	1.23099e-11	4.68921e-12	8.5849e-11	1921.67	0.000235446	0.000430788	0.000424853	4.69669e-05	0.000500702	0.0797104	1.55461	0.00338993	0.0723357	0.700818	6.63363e-06	0.00566852	0.015532	416.501	0.00164182
6.2535e-13	1.28639e-12	1.06185e-14	9.85747e-16	2.44309e-17	7.87833e-13	3.44882e-14	7.49541e-14	3.34341e-10	2.16732e-11	1.44216e-12	3.78577e-09	5.81578e-13	3.09551e-08	1.79304e-16	6.47012e-15	7.61377e-13	7.895e-13	1.48453e-10	8.45337e-08	1.96964e-13	2.90261e-12	4.52437e-11	4.33996e-13	1.19224e-14	4.32142e-10	7.05027e-13	2.84007e-13	1.55089e-12	9.53713e-09	9.44486e-09	1.23099e-11	4.68921e-12	8.5849e-11	1921.67	0.000235446	0.000430788	0.000424853	4.69669e-05	0.000500702	0.0797104	1.55461	0.00338993	0.0723357	0.700818	6.63363e-06	0.00566852	0.015532	416.501	0.00164182
6.2535e-13	1.28639e-12	1.06185e-14	9.85747e-16	2.44309e-17	7.87833e-13	3.44882e-14	7.49541e-14	3.34341e-10	2.16732e-11	1.44216e-12	3.78577e-09	5.81578e-13	3.09551e-08	1.79304e-16	6.47012e-15	7.61377e-13	7.895e-13	1.48453e-10	8.45337e-08	1.96964e-13	2.90261e-12	4.52437e-11	4.33996e-13	1.19224e-14	4.32142e-10	7.05027e-13	2.84007e-13	1.55089e-12	9.53713e-09	9.44486e-09	1.23099e-11	4.68921e-12	8.5849e-11	1921.67	0.000235446	0.000430788	0.000424853	4.69669e-05	0.000500702	0.0797104	1.55461	0.00338993	0.0723357	0.700818	6.63363e-06	0.00566852	0.015532	416.501	0.00164182
6.25646e-13	1.46993e-12	1.37298e-14	7.45612e-16	2.40043e-17	7.49236e-13	5.02961e-14	5.41841e-14	5.26061e-10	2.36731e-11	1.44756e-12	3.22469e-09	6.93702e-13	3.04259e-08	1.28999e-16	7.35575e-15	5.16299e-13	7.12142e-13	1.06095e-10	7.93918e-08	3.05587e-13	2.5089e-12	3.49642e-11	3.39872e-13	1.09687e-14	2.37542e-10	5.98457e-13	2.73225e-13	9.74199e-13	7.00036e-09	1.00036e-08	9.46184e-12	5.21391e-12	6.83353e-11	2491.91	0.000224521	0.000418007	0.000361884	4.73343e-05	0.000402768	0.109568	1.50421	0.00412243	0.0804737	0.738963	8.51162e-06	0.005864	0.0220767	730.41	0.00182009
6.2535e-13	1.28639e-12	1.06185e-14	9.85747e-16	2.44309e-17	7.87833e-13	3.44882e-14	7.49541e-14	3.34341e-10	2.16732e-11	1.44216e-12	3.78577e-09	5.81578e-13	3.09551e-08	1.79304e-16	6.47012e-15	7.61377e-13	7.895e-13	1.48453e-10	8.45337e-08	1.96964e-13	2.90261e-12	4.52437e-11	4.33996e-13	1.19224e-14	4.32142e-10	7.05027e-13	2.84007e-13	1.55089e-12	9.53713e-09	9.44486e-09	1.23099e-11	4.68921e-12	8.5849e-11	1921.67	0.000235446	0.000430788	0.000424853	4.69669e-05	0.000500702	0.0797104	1.55461	0.00338993	0.0723357	0.700818	6.63363e-06	0.00566852	0.015532	416.501	0.00164182
6.2535e-13	1.28639e-12	1.06185e-14	9.85747e-16	2.44309e-17	7.87833e-13	3.44882e-14	7.49541e-14	3.34341e-10	2.16732e-11	1.44216e-12	3.78577e-09	5.81578e-13	3.09551e-08	1.79304e-16	6.47012e-15	7.61377e-13	7.895e-13	1.48453e-10	8.45337e-08	1.96964e-13	2.90261e-12	4.52437e-11	4.33996e-13	1.19224e-14	4.32142e-10	7.05027e-13	2.84007e-13	1.55089e-12	9.53713e-09	9.44486e-09	1.23099e-11	4.68921e-12	8.5849e-11	1921.67	0.000235446	0.000430788	0.000424853	4.69669e-05	0.000500702	0.0797104	1.55461	0.00338993	0.0723357	0.700818	6.63363e-06	0.00566852	0.015532	416.501	0.00164182
6.2535e-13	1.28639e-12	1.06185e-14	9.85747e-16	2.44309e-17	7.87833e-13	3.44882e-14	7.49541e-14	3.34341e-10	2.16732e-11	1.44216e-12	3.78577e-09	5.81578e-13	3.09551e-08	1.79304e-16	6.47012e-15	7.61377e-13	7.895e-13	1.48453e-10	8.45337e-08	1.96964e-13	2.90261e-12	4.52437e-11	4.33996e-13	1.19224e-14	4.32142e-10	7.05027e-13	2.84007e-13	1.55089e-12	9.53713e-09	9.44486e-09	1.23099e-11	4.68921e-12	8.5849e-11	1921.67	0.000235446	0.000430788	0.000424853	4.69669e-05	0.000500702	0.0797104	1.55461	0.00338993	0.0723357	0.700818	6.63363e-06	0.00566852	0.015532	416.501	0.00164182
6.2535e-13	1.28639e-12	1.06185e-14	9.85747e-16	2.44309e-17	7.87833e-13	3.44882e-14	7.49541e-14	3.34341e-10	2.16732e-11	1.44216e-12	3.78577e-09	5.81578e-13	3.09551e-08	1.79304e-16	6.47012e-15	7.61377e-13	7.895e-13	1.48453e-10	8.45337e-08	1.96964e-13	2.90261e-12	4.52437e-11	4.33996e-13	1.19224e-14	4.32142e-10	7.05027e-13	2.84007e-13	1.55089e-12	9.53713e-09	9.44486e-09	1.23099e-11	4.68921e-12	8.5849e-11	1921.67	0.000235446	0.000430788	0.000424853	4.69669e-05	0.000500702	0.0797104	1.55461	0.00338993	0.0723357	0.700818	6.63363e-06	0.00566852	0.015532	416.501	0.00164182
6.2535e-13	1.28639e-12	1.06185e-14	9.85747e-16	2.44309e-17	7.87833e-13	3.44882e-14	7.49541e-14	3.34341e-10	2.16732e-11	1.44216e-12	3.78577e-09	5.81578e-13	3.09551e-08	1.79304e-16	6.47012e-15	7.61377e-13	7.895e-13	1.48453e-10	8.45337e-08	1.96964e-13	2.90261e-12	4.52437e-11	4.33996e-13	1.19224e-14	4.32142e-10	7.05027e-13	2.84007e-13	1.55089e-12	9.53713e-09	9.44486e-09	1.23099e-11	4.68921e-12	8.5849e-11	1921.67	0.000235446	0.000430788	0.000424853	4.69669e-05	0.000500702	0.0797104	1.55461	0.00338993	0.0723357	0.700818	6.63363e-06	0.00566852	0.015532	416.501	0.00164182
6.2535e-13	1.28639e-12	1.06185e-14	9.85747e-16	2.44309e-17	7.87833e-13	3.44882e-14	7.49541e-14	3.34341e-10	2.16732e-11	1.44216e-12	3.78577e-09	5.81578e-13	3.09551e-08	1.79304e-16	6.47012e-15	7.61377e-13	7.895e-13	1.48453e-10	8.45337e-08	1.96964e-13	2.90261e-12	4.52437e-11	4.33996e-13	1.19224e-14	4.32142e-10	7.05027e-13	2.84007e-13	1.55089e-12	9.53713e-09	9.44486e-09	1.23099e-11	4.68921e-12	8.5849e-11	1921.67	0.000235446	0.000430788	0.000424853	4.69669e-05	0.000500702	0.0797104	1.55461	0.00338993	0.0723357	0.700818	6.63363e-06	0.00566852	0.015532	416.501	0.00164182
6.2535e-13	1.28639e-12	1.06185e-14	9.85747e-16	2.44309e-17	7.87833e-13	3.44882e-14	7.49541e-14	3.34341e-10	2.16732e-11	1.44216e-12	3.78577e-09	5.81578e-13	3.09551e-08	1.79304e-16	6.47012e-15	7.61377e-13	7.895e-13	1.48453e-10	8.45337e-08	1.96964e-13	2.90261e-12	4.52437e-11	4.33996e-13	1.19224e-14	4.32142e-10	7.05027e-13	2.84007e-13	1.55089e-12	9.53713e-09	9.44486e-09	1.23099e-11	4.68921e-12	8.5849e-11	1921.67	0.000235446	0.000430788	0.000424853	4.69669e-05	0.000500702	0.0797104	1.55461	0.00338993	0.0723357	0.700818	6.63363e-06	0.00566852	0.015532	416.501	0.00164182
6.2535e-13	1.28639e-12	1.06185e-14	9.85747e-16	2.44309e-17	7.87833e-13	3.44882e-14	7.49541e-14	3.34341e-10	2.16732e-11	1.44216e-12	3.78577e-09	5.81578e-13	3.09551e-08	1.79304e-16	6.47012e-15	7.61377e-13	7.895e-13	1.48453e-10	8.45337e-08	1.96964e-13	2.90261e-12	4.52437e-11	4.33996e-13	1.19224e-14	4.32142e-10	7.05027e-13	2.84007e-13	1.55089e-12	9.53713e-09	9.44486e-09	1.23099e-11	4.68921e-12	8.5849e-11	1921.67	0.000235446	0.000430788	0.000424853	4.69669e-05	0.000500702	0.0797104	1.55461	0.00338993	0.0723357	0.700818	6.63363e-06	0.00566852	0.015532	416.501	0.00164182
6.2535e-13	1.28639e-12	1.06185e-14	9.85747e-16	2.44309e-17	7.87833e-13	3.44882e-14	7.49541e-14	3.34341e-10	2.16732e-11	1.44216e-12	3.78577e-09	5.81578e-13	3.09551e-08	1.79304e-16	6.47012e-15	7.61377e-13	7.895e-13	1.48453e-10	8.45337e-08	1.96964e-13	2.90261e-12	4.52437e-11	4.33996e-13	1.19224e-14	4.32142e-10	7.05027e-13	2.84007e-13	1.55089e-12	9.53713e-09	9.44486e-09	1.23099e-11	4.68921e-12	8.5849e-11	1921.67	0.000235446	0.000430788	0.000424853	4.69669e-05	0.000500702	0.0797104	1.55461	0.00338993	0.0723357	0.700818	6.63363e-06	0.00566852	0.015532	416.501	0.00164182
6.2535e-13	1.28639e-12	1.06185e-14	9.85747e-16	2.44309e-17	7.87833e-13	3.44882e-14	7.49541e-14	3.34341e-10	2.16732e-11	1.44216e-12	3.78577e-09	5.81578e-13	3.09551e-08	1.79304e-16	6.47012e-15	7.61377e-13	7.895e-13	1.48453e-10	8.45337e-08	1.96964e-13	2.90261e-12	4.52437e-11	4.33996e-13	1.19224e-14	4.32142e-10	7.05027e-13	2.84007e-13	1.55089e-12	9.53713e-09	9.44486e-09	1.23099e-11	4.68921e-12	8.5849e-11	1921.67	0.000235446	0.000430788	0.000424853	4.69669e-05	0.000500702	0.0797104	1.55461	0.00338993	0.0723357	0.700818	6.63363e-06	0.00566852	0.015532	416.501	0.00164182
6.2535e-13	1.28639e-12	1.06185e-14	9.85747e-16	2.44309e-17	7.87833e-13	3.44882e-14	7.49541e-14	3.34341e-10	2.16732e-11	1.44216e-12	3.78577e-09	5.81578e-13	3.09551e-08	1.79304e-16	6.47012e-15	7.61377e-13	7.895e-13	1.48453e-10	8.45337e-08	1.96964e-13	2.90261e-12	4.52437e-11	4.33996e-13	1.19224e-14	4.32142e-10	7.05027e-13	2.84007e-13	1.55089e-12	9.53713e-09	9.44486e-09	1.23099e-11	4.68921e-12	8.5849e-11	1921.67	0.000235446	0.000430788	0.000424853	4.69669e-05	0.000500702	0.0797104	1.55461	0.00338993	0.0723357	0.700818	6.63363e-06	0.00566852	0.015532	416.501	0.00164182
6.2535e-13	1.28639e-12	1.06185e-14	9.85747e-16	2.44309e-17	7.87833e-13	3.44882e-14	7.49541e-14	3.34341e-10	2.16732e-11	1.44216e-12	3.78577e-09	5.81578e-13	3.09551e-08	1.79304e-16	6.47012e-15	7.61377e-13	7.895e-13	1.48453e-10	8.45337e-08	1.96964e-13	2.90261e-12	4.52437e-11	4.33996e-13	1.19224e-14	4.32142e-10	7.05027e-13	2.84007e-13	1.55089e-12	9.53713e-09	9.44486e-09	1.23099e-11	4.68921e-12	8.5849e-11	1921.67	0.000235446	0.000430788	0.000424853	4.69669e-05	0.000500702	0.0797104	1.55461	0.00338993	0.0723357	0.700818	6.63363e-06	0.00566852	0.015532	416.501	0.00164182
6.2535e-13	1.28639e-12	1.06185e-14	9.85747e-16	2.44309e-17	7.87833e-13	3.44882e-14	7.49541e-14	3.34341e-10	2.16732e-11	1.44216e-12	3.78577e-09	5.81578e-13	3.09551e-08	1.79304e-16	6.47012e-15	7.61377e-13	7.895e-13	1.48453e-10	8.45337e-08	1.96964e-13	2.90261e-12	4.52437e-11	4.33996e-13	1.19224e-14	4.32142e-10	7.05027e-13	2.84007e-13	1.55089e-12	9.53713e-09	9.44486e-09	1.23099e-11	4.68921e-12	8.5849e-11	1921.67	0.000235446	0.000430788	0.000424853	4.69669e-05	0.000500702	0.0797104	1.55461	0.00338993	0.0723357	0.700818	6.63363e-06	0.00566852	0.015532	416.501	0.00164182
6.2535e-13	1.28639e-12	1.06185e-14	9.85747e-16	2.44309e-17	7.87833e-13	3.44882e-14	7.49541e-14	3.34341e-10	2.16732e-11	1.44216e-12	3.78577e-09	5.81578e-13	3.09551e-08	1.79304e-16	6.47012e-15	7.61377e-13	7.895e-13	1.48453e-10	8.45337e-08	1.96964e-13	2.90261e-12	4.52437e-11	4.33996e-13	1.19224e-14	4.32142e-10	7.05027e-13	2.84007e-13	1.55089e-12	9.53713e-09	9.44486e-09	1.23099e-11	4.68921e-12	8.5849e-11	1921.67	0.000235446	0.000430788	0.000424853	4.69669e-05	0.000500702	0.0797104	1.55461	0.00338993	0.0723357	0.700818	6.63363e-06	0.00566852	0.015532	416.501	0.00164182
6.2535e-13	1.28639e-12	1.06185e-14	9.85747e-16	2.44309e-17	7.87833e-13	3.44882e-14	7.49541e-14	3.34341e-10	2.16732e-11	1.44216e-12	3.78577e-09	5.81578e-13	3.09551e-08	1.79304e-16	6.47012e-15	7.61377e-13	7.895e-13	1.48453e-10	8.45337e-08	1.96964e-13	2.90261e-12	4.52437e-11	4.33996e-13	1.19224e-14	4.32142e-10	7.05027e-13	2.84007e-13	1.55089e-12	9.53713e-09	9.44486e-09	1.23099e-11	4.68921e-12	8.5849e-11	1921.67	0.000235446	0.000430788	0.000424853	4.69669e-05	0.000500702	0.0797104	1.55461	0.00338993	0.0723357	0.700818	6.63363e-06	0.00566852	0.015532	416.501	0.00164182
6.2535e-13	1.28639e-12	1.06185e-14	9.85747e-16	2.44309e-17	7.87833e-13	3.44882e-14	7.49541e-14	3.34341e-10	2.16732e-11	1.44216e-12	3.78577e-09	5.81578e-13	3.09551e-08	1.79304e-16	6.47012e-15	7.61377e-13	7.895e-13	1.48453e-10	8.45337e-08	1.96964e-13	2.90261e-12	4.52437e-11	4.33996e-13	1.19224e-14	4.32142e-10	7.05027e-13	2.84007e-13	1.55089e-12	9.53713e-09	9.44486e-09	1.23099e-11	4.68921e-12	8.5849e-11	1921.67	0.000235446	0.000430788	0.000424853	4.69669e-05	0.000500702	0.0797104	1.55461	0.00338993	0.0723357	0.700818	6.63363e-06	0.00566852	0.015532	416.501	0.00164182
6.2535e-13	1.28639e-12	1.06185e-14	9.85747e-16	2.44309e-17	7.87833e-13	3.44882e-14	7.49541e-14	3.34341e-10	2.16732e-11	1.44216e-12	3.78577e-09	5.81578e-13	3.09551e-08	1.79304e-16	6.47012e-15	7.61377e-13	7.895e-13	1.48453e-10	8.45337e-08	1.96964e-13	2.90261e-12	4.52437e-11	4.33996e-13	1.19224e-14	4.32142e-10	7.05027e-13	2.84007e-13	1.55089e-12	9.53713e-09	9.44486e-09	1.23099e-11	4.68921e-12	8.5849e-11	1921.67	0.000235446	0.000430788	0.000424853	4.69669e-05	0.000500702	0.0797104	1.55461	0.00338993	0.0723357	0.700818	6.63363e-06	0.00566852	0.015532	416.501	0.00164182
6.2535e-13	1.28639e-12	1.06185e-14	9.85747e-16	2.44309e-17	7.87833e-13	3.44882e-14	7.49541e-14	3.34341e-10	2.16732e-11	1.44216e-12	3.78577e-09	5.81578e-13	3.09551e-08	1.79304e-16	6.47012e-15	7.61377e-13	7.895e-13	1.48453e-10	8.45337e-08	1.96964e-13	2.90261e-12	4.52437e-11	4.33996e-13	1.19224e-14	4.32142e-10	7.05027e-13	2.84007e-13	1.55089e-12	9.53713e-09	9.44486e-09	1.23099e-11	4.68921e-12	8.5849e-11	1921.67	0.000235446	0.000430788	0.000424853	4.69669e-05	0.000500702	0.0797104	1.55461	0.00338993	0.0723357	0.700818	6.63363e-06	0.00566852	0.015532	416.501	0.00164182
6.2535e-13	1.28639e-12	1.06185e-14	9.85747e-16	2.44309e-17	7.87833e-13	3.44882e-14	7.49541e-14	3.34341e-10	2.16732e-11	1.44216e-12	3.78577e-09	5.81578e-13	3.09551e-08	1.79304e-16	6.47012e-15	7.61377e-13	7.895e-13	1.48453e-10	8.45337e-08	1.96964e-13	2.90261e-12	4.52437e-11	4.33996e-13	1.19224e-14	4.32142e-10	7.05027e-13	2.84007e-13	1.55089e-12	9.53713e-09	9.44486e-09	1.23099e-11	4.68921e-12	8.5849e-11	1921.67	0.000235446	0.000430788	0.000424853	4.69669e-05	0.000500702	0.0797104	1.55461	0.00338993	0.0723357	0.700818	6.63363e-06	0.00566852	0.015532	416.501	0.00164182
6.25544e-13	1.47846e-12	1.29682e-14	9.71491e-16	2.63571e-17	7.74203e-13	5.02887e-14	8.15469e-14	2.51235e-10	1.94169e-11	1.3927e-12	5.18364e-09	6.10155e-13	3.66934e-08	1.27341e-16	6.58039e-15	2.5844e-13	8.59001e-13	1.35106e-10	9.41563e-08	2.20215e-13	2.64597e-12	5.1282e-11	4.90506e-13	1.5754e-14	7.31541e-10	7.63881e-13	2.32011e-13	2.23888e-12	1.22558e-08	6.82844e-09	1.32889e-11	5.43668e-12	6.75342e-11	1219.41	0.000235372	0.000468828	0.000429403	4.85137e-05	0.000596411	0.0979179	1.32226	0.00408726	0.0694863	1.23319	7.70091e-06	0.00460955	0.0146063	376.38	0.00157322
6.2535e-13	1.28639e-12	1.06185e-14	9.85747e-16	2.44309e-17	7.87833e-13	3.44882e-14	7.49541e-14	3.34341e-10	2.16732e-11	1.44216e-12	3.78577e-09	5.81578e-13	3.09551e-08	1.79304e-16	6.47012e-15	7.61377e-13	7.895e-13	1.48453e-10	8.45337e-08	1.96964e-13	2.90261e-12	4.52437e-11	4.33996e-13	1.19224e-14	4.32142e-10	7.05027e-13	2.84007e-13	1.55089e-12	9.53713e-09	9.44486e-09	1.23099e-11	4.68921e-12	8.5849e-11	1921.67	0.000235446	0.000430788	0.000424853	4.69669e-05	0.000500702	0.0797104	1.55461	0.00338993	0.0723357	0.700818	6.63363e-06	0.00566852	0.015532	416.501	0.00164182
6.2535e-13	1.28639e-12	1.06185e-14	9.85747e-16	2.44309e-17	7.87833e-13	3.44882e-14	7.49541e-14	3.34341e-10	2.16732e-11	1.44216e-12	3.78577e-09	5.81578e-13	3.09551e-08	1.79304e-16	6.47012e-15	7.61377e-13	7.895e-13	1.48453e-10	8.45337e-08	1.96964e-13	2.90261e-12	4.52437e-11	4.33996e-13	1.19224e-14	4.32142e-10	7.05027e-13	2.84007e-13	1.55089e-12	9.53713e-09	9.44486e-09	1.23099e-11	4.68921e-12	8.5849e-11	1921.67	0.000235446	0.000430788	0.000424853	4.69669e-05	0.000500702	0.0797104	1.55461	0.00338993	0.0723357	0.700818	6.63363e-06	0.00566852	0.015532	416.501	0.00164182
6.23851e-13	1.59792e-12	1.14671e-14	1.17439e-15	5.0457e-17	8.20945e-13	4.77902e-14	5.97978e-14	3.20447e-10	1.93739e-11	1.38396e-12	6.63837e-09	1.03935e-12	1.01672e-08	1.58324e-16	1.39122e-14	6.95268e-13	8.92917e-13	1.17966e-10	7.90685e-08	1.57854e-13	3.73314e-12	7.64091e-11	5.34534e-13	1.14242e-14	8.30361e-10	8.11646e-13	2.16179e-13	1.13036e-12	1.03878e-08	1.09669e-08	1.16748e-11	5.4564e-12	1.02777e-10	887.447	0.000207437	0.00045745	0.000342318	0.000100755	0.000852967	0.11578	1.1842	0.00287557	0.0747282	1.09226	9.80913e-06	0.00442293	0.0120327	1115.22	0.00147687
6.24935e-13	1.39374e-12	3.10239e-14	1.15797e-15	1.17861e-17	7.62743e-13	3.48242e-14	6.41992e-14	1.86164e-10	1.86034e-11	1.28579e-12	3.25657e-09	5.79674e-13	3.83247e-08	1.2052e-16	5.63371e-15	4.27432e-13	8.07787e-13	1.29013e-10	8.99731e-08	1.71216e-13	2.78414e-12	3.62535e-11	4.10286e-13	1.22252e-14	2.319e-10	7.69193e-13	1.72517e-13	9.79883e-13	1.19285e-08	1.18612e-08	1.59087e-11	4.74435e-12	7.68622e-11	2216.05	0.000229396	0.00043699	0.000677051	4.22867e-05	0.0010365	0.0761191	1.20008	0.00288508	0.0738134	0.528369	3.00926e-06	0.00745853	0.0163496	239.205	0.0016612
6.2535e-13	1.28639e-12	1.06185e-14	9.85747e-16	2.44309e-17	7.87833e-13	3.44882e-14	7.49541e-14	3.34341e-10	2.16732e-11	1.44216e-12	3.78577e-09	5.81578e-13	3.09551e-08	1.79304e-16	6.47012e-15	7.61377e-13	7.895e-13	1.48453e-10	8.45337e-08	1.96964e-13	2.90261e-12	4.52437e-11	4.33996e-13	1.19224e-14	4.32142e-10	7.05027e-13	2.84007e-13	1.55089e-12	9.53713e-09	9.44486e-09	1.23099e-11	4.68921e-12	8.5849e-11	1921.67	0.000235446	0.000430788	0.000424853	4.69669e-05	0.000500702	0.0797104	1.55461	0.00338993	0.0723357	0.700818	6.63363e-06	0.00566852	0.015532	416.501	0.00164182
6.2535e-13	1.28639e-12	1.06185e-14	9.85747e-16	2.44309e-17	7.87833e-13	3.44882e-14	7.49541e-14	3.34341e-10	2.16732e-11	1.44216e-12	3.78577e-09	5.81578e-13	3.09551e-08	1.79304e-16	6.47012e-15	7.61377e-13	7.895e-13	1.48453e-10	8.45337e-08	1.96964e-13	2.90261e-12	4.52437e-11	4.33996e-13	1.19224e-14	4.32142e-10	7.05027e-13	2.84007e-13	1.55089e-12	9.53713e-09	9.44486e-09	1.23099e-11	4.68921e-12	8.5849e-11	1921.67	0.000235446	0.000430788	0.000424853	4.69669e-05	0.000500702	0.0797104	1.55461	0.00338993	0.0723357	0.700818	6.63363e-06	0.00566852	0.015532	416.501	0.00164182
6.2535e-13	1.28639e-12	1.06185e-14	9.85747e-16	2.44309e-17	7.87833e-13	3.44882e-14	7.49541e-14	3.34341e-10	2.16732e-11	1.44216e-12	3.78577e-09	5.81578e-13	3.09551e-08	1.79304e-16	6.47012e-15	7.61377e-13	7.895e-13	1.48453e-10	8.45337e-08	1.96964e-13	2.90261e-12	4.52437e-11	4.33996e-13	1.19224e-14	4.32142e-10	7.05027e-13	2.84007e-13	1.55089e-12	9.53713e-09	9.44486e-09	1.23099e-11	4.68921e-12	8.5849e-11	1921.67	0.000235446	0.000430788	0.000424853	4.69669e-05	0.000500702	0.0797104	1.55461	0.00338993	0.0723357	0.700818	6.63363e-06	0.00566852	0.015532	416.501	0.00164182
6.25333e-13	1.70275e-12	1.29604e-14	1.3582e-15	7.64911e-18	7.66688e-13	1.62865e-14	6.79318e-14	5.15104e-10	1.1746e-11	1.3189e-12	5.73438e-09	1.1429e-12	3.33061e-08	1.28335e-16	9.45878e-15	7.88492e-13	6.92448e-13	2.00758e-10	4.32693e-08	2.2861e-13	3.37935e-12	3.86226e-11	3.62755e-13	7.98881e-15	4.08718e-10	5.5273e-13	1.66816e-13	1.77377e-12	3.10824e-08	1.01265e-08	1.5258e-11	2.84317e-12	1.20387e-10	1835.03	0.000236971	0.000452928	0.000221723	3.90926e-05	0.000489174	0.12697	1.16918	0.00386449	0.181883	0.419483	1.14988e-05	0.0073305	0.0287352	201.86	0.001386
6.2535e-13	1.28639e-12	1.06185e-14	9.85747e-16	2.44309e-17	7.87833e-13	3.44882e-14	7.49541e-14	3.34341e-10	2.16732e-11	1.44216e-12	3.78577e-09	5.81578e-13	3.09551e-08	1.79304e-16	6.47012e-15	7.61377e-13	7.895e-13	1.48453e-10	8.45337e-08	1.96964e-13	2.90261e-12	4.52437e-11	4.33996e-13	1.19224e-14	4.32142e-10	7.05027e-13	2.84007e-13	1.55089e-12	9.53713e-09	9.44486e-09	1.23099e-11	4.68921e-12	8.5849e-11	1921.67	0.000235446	0.000430788	0.000424853	4.69669e-05	0.000500702	0.0797104	1.55461	0.00338993	0.0723357	0.700818	6.63363e-06	0.00566852	0.015532	416.501	0.00164182
6.2535e-13	1.28639e-12	1.06185e-14	9.85747e-16	2.44309e-17	7.87833e-13	3.44882e-14	7.49541e-14	3.34341e-10	2.16732e-11	1.44216e-12	3.78577e-09	5.81578e-13	3.09551e-08	1.79304e-16	6.47012e-15	7.61377e-13	7.895e-13	1.48453e-10	8.45337e-08	1.96964e-13	2.90261e-12	4.52437e-11	4.33996e-13	1.19224e-14	4.32142e-10	7.05027e-13	2.84007e-13	1.55089e-12	9.53713e-09	9.44486e-09	1.23099e-11	4.68921e-12	8.5849e-11	1921.67	0.000235446	0.000430788	0.000424853	4.69669e-05	0.000500702	0.0797104	1.55461	0.00338993	0.0723357	0.700818	6.63363e-06	0.00566852	0.015532	416.501	0.00164182
6.2535e-13	1.28639e-12	1.06185e-14	9.85747e-16	2.44309e-17	7.87833e-13	3.44882e-14	7.49541e-14	3.34341e-10	2.16732e-11	1.44216e-12	3.78577e-09	5.81578e-13	3.09551e-08	1.79304e-16	6.47012e-15	7.61377e-13	7.895e-13	1.48453e-10	8.45337e-08	1.96964e-13	2.90261e-12	4.52437e-11	4.33996e-13	1.19224e-14	4.32142e-10	7.05027e-13	2.84007e-13	1.55089e-12	9.53713e-09	9.44486e-09	1.23099e-11	4.68921e-12	8.5849e-11	1921.67	0.000235446	0.000430788	0.000424853	4.69669e-05	0.000500702	0.0797104	1.55461	0.00338993	0.0723357	0.700818	6.63363e-06	0.00566852	0.015532	416.501	0.00164182
6.2535e-13	1.28639e-12	1.06185e-14	9.85747e-16	2.44309e-17	7.87833e-13	3.44882e-14	7.49541e-14	3.34341e-10	2.16732e-11	1.44216e-12	3.78577e-09	5.81578e-13	3.09551e-08	1.79304e-16	6.47012e-15	7.61377e-13	7.895e-13	1.48453e-10	8.45337e-08	1.96964e-13	2.90261e-12	4.52437e-11	4.33996e-13	1.19224e-14	4.32142e-10	7.05027e-13	2.84007e-13	1.55089e-12	9.53713e-09	9.44486e-09	1.23099e-11	4.68921e-12	8.5849e-11	1921.67	0.000235446	0.000430788	0.000424853	4.69669e-05	0.000500702	0.0797104	1.55461	0.00338993	0.0723357	0.700818	6.63363e-06	0.00566852	0.015532	416.501	0.00164182
6.2535e-13	1.28639e-12	1.06185e-14	9.85747e-16	2.44309e-17	7.87833e-13	3.44882e-14	7.49541e-14	3.34341e-10	2.16732e-11	1.44216e-12	3.78577e-09	5.81578e-13	3.09551e-08	1.79304e-16	6.47012e-15	7.61377e-13	7.895e-13	1.48453e-10	8.45337e-08	1.96964e-13	2.90261e-12	4.52437e-11	4.33996e-13	1.19224e-14	4.32142e-10	7.05027e-13	2.84007e-13	1.55089e-12	9.53713e-09	9.44486e-09	1.23099e-11	4.68921e-12	8.5849e-11	1921.67	0.000235446	0.000430788	0.000424853	4.69669e-05	0.000500702	0.0797104	1.55461	0.00338993	0.0723357	0.700818	6.63363e-06	0.00566852	0.015532	416.501	0.00164182
6.2535e-13	1.28639e-12	1.06185e-14	9.85747e-16	2.44309e-17	7.87833e-13	3.44882e-14	7.49541e-14	3.34341e-10	2.16732e-11	1.44216e-12	3.78577e-09	5.81578e-13	3.09551e-08	1.79304e-16	6.47012e-15	7.61377e-13	7.895e-13	1.48453e-10	8.45337e-08	1.96964e-13	2.90261e-12	4.52437e-11	4.33996e-13	1.19224e-14	4.32142e-10	7.05027e-13	2.84007e-13	1.55089e-12	9.53713e-09	9.44486e-09	1.23099e-11	4.68921e-12	8.5849e-11	1921.67	0.000235446	0.000430788	0.000424853	4.69669e-05	0.000500702	0.0797104	1.55461	0.00338993	0.0723357	0.700818	6.63363e-06	0.00566852	0.015532	416.501	0.00164182
6.2535e-13	1.28639e-12	1.06185e-14	9.85747e-16	2.44309e-17	7.87833e-13	3.44882e-14	7.49541e-14	3.34341e-10	2.16732e-11	1.44216e-12	3.78577e-09	5.81578e-13	3.09551e-08	1.79304e-16	6.47012e-15	7.61377e-13	7.895e-13	1.48453e-10	8.45337e-08	1.96964e-13	2.90261e-12	4.52437e-11	4.33996e-13	1.19224e-14	4.32142e-10	7.05027e-13	2.84007e-13	1.55089e-12	9.53713e-09	9.44486e-09	1.23099e-11	4.68921e-12	8.5849e-11	1921.67	0.000235446	0.000430788	0.000424853	4.69669e-05	0.000500702	0.0797104	1.55461	0.00338993	0.0723357	0.700818	6.63363e-06	0.00566852	0.015532	416.501	0.00164182
6.2535e-13	1.28639e-12	1.06185e-14	9.85747e-16	2.44309e-17	7.87833e-13	3.44882e-14	7.49541e-14	3.34341e-10	2.16732e-11	1.44216e-12	3.78577e-09	5.81578e-13	3.09551e-08	1.79304e-16	6.47012e-15	7.61377e-13	7.895e-13	1.48453e-10	8.45337e-08	1.96964e-13	2.90261e-12	4.52437e-11	4.33996e-13	1.19224e-14	4.32142e-10	7.05027e-13	2.84007e-13	1.55089e-12	9.53713e-09	9.44486e-09	1.23099e-11	4.68921e-12	8.5849e-11	1921.67	0.000235446	0.000430788	0.000424853	4.69669e-05	0.000500702	0.0797104	1.55461	0.00338993	0.0723357	0.700818	6.63363e-06	0.00566852	0.015532	416.501	0.00164182
6.2535e-13	1.28639e-12	1.06185e-14	9.85747e-16	2.44309e-17	7.87833e-13	3.44882e-14	7.49541e-14	3.34341e-10	2.16732e-11	1.44216e-12	3.78577e-09	5.81578e-13	3.09551e-08	1.79304e-16	6.47012e-15	7.61377e-13	7.895e-13	1.48453e-10	8.45337e-08	1.96964e-13	2.90261e-12	4.52437e-11	4.33996e-13	1.19224e-14	4.32142e-10	7.05027e-13	2.84007e-13	1.55089e-12	9.53713e-09	9.44486e-09	1.23099e-11	4.68921e-12	8.5849e-11	1921.67	0.000235446	0.000430788	0.000424853	4.69669e-05	0.000500702	0.0797104	1.55461	0.00338993	0.0723357	0.700818	6.63363e-06	0.00566852	0.015532	416.501	0.00164182
6.2535e-13	1.28639e-12	1.06185e-14	9.85747e-16	2.44309e-17	7.87833e-13	3.44882e-14	7.49541e-14	3.34341e-10	2.16732e-11	1.44216e-12	3.78577e-09	5.81578e-13	3.09551e-08	1.79304e-16	6.47012e-15	7.61377e-13	7.895e-13	1.48453e-10	8.45337e-08	1.96964e-13	2.90261e-12	4.52437e-11	4.33996e-13	1.19224e-14	4.32142e-10	7.05027e-13	2.84007e-13	1.55089e-12	9.53713e-09	9.44486e-09	1.23099e-11	4.68921e-12	8.5849e-11	1921.67	0.000235446	0.000430788	0.000424853	4.69669e-05	0.000500702	0.0797104	1.55461	0.00338993	0.0723357	0.700818	6.63363e-06	0.00566852	0.015532	416.501	0.00164182
6.2535e-13	1.28639e-12	1.06185e-14	9.85747e-16	2.44309e-17	7.87833e-13	3.44882e-14	7.49541e-14	3.34341e-10	2.16732e-11	1.44216e-12	3.78577e-09	5.81578e-13	3.09551e-08	1.79304e-16	6.47012e-15	7.61377e-13	7.895e-13	1.48453e-10	8.45337e-08	1.96964e-13	2.90261e-12	4.52437e-11	4.33996e-13	1.19224e-14	4.32142e-10	7.05027e-13	2.84007e-13	1.55089e-12	9.53713e-09	9.44486e-09	1.23099e-11	4.68921e-12	8.5849e-11	1921.67	0.000235446	0.000430788	0.000424853	4.69669e-05	0.000500702	0.0797104	1.55461	0.00338993	0.0723357	0.700818	6.63363e-06	0.00566852	0.015532	416.501	0.00164182
6.2535e-13	1.28639e-12	1.06185e-14	9.85747e-16	2.44309e-17	7.87833e-13	3.44882e-14	7.49541e-14	3.34341e-10	2.16732e-11	1.44216e-12	3.78577e-09	5.81578e-13	3.09551e-08	1.79304e-16	6.47012e-15	7.61377e-13	7.895e-13	1.48453e-10	8.45337e-08	1.96964e-13	2.90261e-12	4.52437e-11	4.33996e-13	1.19224e-14	4.32142e-10	7.05027e-13	2.84007e-13	1.55089e-12	9.53713e-09	9.44486e-09	1.23099e-11	4.68921e-12	8.5849e-11	1921.67	0.000235446	0.000430788	0.000424853	4.69669e-05	0.000500702	0.0797104	1.55461	0.00338993	0.0723357	0.700818	6.63363e-06	0.00566852	0.015532	416.501	0.00164182
6.2535e-13	1.28639e-12	1.06185e-14	9.85747e-16	2.44309e-17	7.87833e-13	3.44882e-14	7.49541e-14	3.34341e-10	2.16732e-11	1.44216e-12	3.78577e-09	5.81578e-13	3.09551e-08	1.79304e-16	6.47012e-15	7.61377e-13	7.895e-13	1.48453e-10	8.45337e-08	1.96964e-13	2.90261e-12	4.52437e-11	4.33996e-13	1.19224e-14	4.32142e-10	7.05027e-13	2.84007e-13	1.55089e-12	9.53713e-09	9.44486e-09	1.23099e-11	4.68921e-12	8.5849e-11	1921.67	0.000235446	0.000430788	0.000424853	4.69669e-05	0.000500702	0.0797104	1.55461	0.00338993	0.0723357	0.700818	6.63363e-06	0.00566852	0.015532	416.501	0.00164182
6.25242e-13	1.32313e-12	1.24766e-14	1.36755e-15	2.04938e-17	7.61099e-13	5.18655e-14	5.79704e-14	2.30876e-10	3.42502e-11	1.35439e-12	5.91552e-09	4.41766e-13	2.4455e-08	7.57359e-17	5.82227e-15	3.88889e-13	8.03375e-13	1.5324e-10	8.26088e-08	3.25555e-14	3.4937e-12	3.18296e-11	4.00144e-13	1.24591e-14	2.80067e-10	7.29585e-13	1.99687e-13	1.01699e-12	5.79254e-09	1.09099e-08	1.91805e-11	7.67273e-12	1.23409e-10	2807	0.000216672	0.000439571	0.000261206	4.68079e-05	0.00024346	0.0957606	1.60527	0.00317237	0.0613663	0.550644	5.50334e-06	0.00639755	0.0118406	260.99	0.00183048
6.2535e-13	1.28639e-12	1.06185e-14	9.85747e-16	2.44309e-17	7.87833e-13	3.44882e-14	7.49541e-14	3.34341e-10	2.16732e-11	1.44216e-12	3.78577e-09	5.81578e-13	3.09551e-08	1.79304e-16	6.47012e-15	7.61377e-13	7.895e-13	1.48453e-10	8.45337e-08	1.96964e-13	2.90261e-12	4.52437e-11	4.33996e-13	1.19224e-14	4.32142e-10	7.05027e-13	2.84007e-13	1.55089e-12	9.53713e-09	9.44486e-09	1.23099e-11	4.68921e-12	8.5849e-11	1921.67	0.000235446	0.000430788	0.000424853	4.69669e-05	0.000500702	0.0797104	1.55461	0.00338993	0.0723357	0.700818	6.63363e-06	0.00566852	0.015532	416.501	0.00164182
6.2535e-13	1.28639e-12	1.06185e-14	9.85747e-16	2.44309e-17	7.87833e-13	3.44882e-14	7.49541e-14	3.34341e-10	2.16732e-11	1.44216e-12	3.78577e-09	5.81578e-13	3.09551e-08	1.79304e-16	6.47012e-15	7.61377e-13	7.895e-13	1.48453e-10	8.45337e-08	1.96964e-13	2.90261e-12	4.52437e-11	4.33996e-13	1.19224e-14	4.32142e-10	7.05027e-13	2.84007e-13	1.55089e-12	9.53713e-09	9.44486e-09	1.23099e-11	4.68921e-12	8.5849e-11	1921.67	0.000235446	0.000430788	0.000424853	4.69669e-05	0.000500702	0.0797104	1.55461	0.00338993	0.0723357	0.700818	6.63363e-06	0.00566852	0.015532	416.501	0.00164182
6.2535e-13	1.28639e-12	1.06185e-14	9.85747e-16	2.44309e-17	7.87833e-13	3.44882e-14	7.49541e-14	3.34341e-10	2.16732e-11	1.44216e-12	3.78577e-09	5.81578e-13	3.09551e-08	1.79304e-16	6.47012e-15	7.61377e-13	7.895e-13	1.48453e-10	8.45337e-08	1.96964e-13	2.90261e-12	4.52437e-11	4.33996e-13	1.19224e-14	4.32142e-10	7.05027e-13	2.84007e-13	1.55089e-12	9.53713e-09	9.44486e-09	1.23099e-11	4.68921e-12	8.5849e-11	1921.67	0.000235446	0.000430788	0.000424853	4.69669e-05	0.000500702	0.0797104	1.55461	0.00338993	0.0723357	0.700818	6.63363e-06	0.00566852	0.015532	416.501	0.00164182
6.2535e-13	1.28639e-12	1.06185e-14	9.85747e-16	2.44309e-17	7.87833e-13	3.44882e-14	7.49541e-14	3.34341e-10	2.16732e-11	1.44216e-12	3.78577e-09	5.81578e-13	3.09551e-08	1.79304e-16	6.47012e-15	7.61377e-13	7.895e-13	1.48453e-10	8.45337e-08	1.96964e-13	2.90261e-12	4.52437e-11	4.33996e-13	1.19224e-14	4.32142e-10	7.05027e-13	2.84007e-13	1.55089e-12	9.53713e-09	9.44486e-09	1.23099e-11	4.68921e-12	8.5849e-11	1921.67	0.000235446	0.000430788	0.000424853	4.69669e-05	0.000500702	0.0797104	1.55461	0.00338993	0.0723357	0.700818	6.63363e-06	0.00566852	0.015532	416.501	0.00164182
6.2535e-13	1.28639e-12	1.06185e-14	9.85747e-16	2.44309e-17	7.87833e-13	3.44882e-14	7.49541e-14	3.34341e-10	2.16732e-11	1.44216e-12	3.78577e-09	5.81578e-13	3.09551e-08	1.79304e-16	6.47012e-15	7.61377e-13	7.895e-13	1.48453e-10	8.45337e-08	1.96964e-13	2.90261e-12	4.52437e-11	4.33996e-13	1.19224e-14	4.32142e-10	7.05027e-13	2.84007e-13	1.55089e-12	9.53713e-09	9.44486e-09	1.23099e-11	4.68921e-12	8.5849e-11	1921.67	0.000235446	0.000430788	0.000424853	4.69669e-05	0.000500702	0.0797104	1.55461	0.00338993	0.0723357	0.700818	6.63363e-06	0.00566852	0.015532	416.501	0.00164182
6.2535e-13	1.28639e-12	1.06185e-14	9.85747e-16	2.44309e-17	7.87833e-13	3.44882e-14	7.49541e-14	3.34341e-10	2.16732e-11	1.44216e-12	3.78577e-09	5.81578e-13	3.09551e-08	1.79304e-16	6.47012e-15	7.61377e-13	7.895e-13	1.48453e-10	8.45337e-08	1.96964e-13	2.90261e-12	4.52437e-11	4.33996e-13	1.19224e-14	4.32142e-10	7.05027e-13	2.84007e-13	1.55089e-12	9.53713e-09	9.44486e-09	1.23099e-11	4.68921e-12	8.5849e-11	1921.67	0.000235446	0.000430788	0.000424853	4.69669e-05	0.000500702	0.0797104	1.55461	0.00338993	0.0723357	0.700818	6.63363e-06	0.00566852	0.015532	416.501	0.00164182
6.2535e-13	1.28639e-12	1.06185e-14	9.85747e-16	2.44309e-17	7.87833e-13	3.44882e-14	7.49541e-14	3.34341e-10	2.16732e-11	1.44216e-12	3.78577e-09	5.81578e-13	3.09551e-08	1.79304e-16	6.47012e-15	7.61377e-13	7.895e-13	1.48453e-10	8.45337e-08	1.96964e-13	2.90261e-12	4.52437e-11	4.33996e-13	1.19224e-14	4.32142e-10	7.05027e-13	2.84007e-13	1.55089e-12	9.53713e-09	9.44486e-09	1.23099e-11	4.68921e-12	8.5849e-11	1921.67	0.000235446	0.000430788	0.000424853	4.69669e-05	0.000500702	0.0797104	1.55461	0.00338993	0.0723357	0.700818	6.63363e-06	0.00566852	0.015532	416.501	0.00164182
6.2535e-13	1.28639e-12	1.06185e-14	9.85747e-16	2.44309e-17	7.87833e-13	3.44882e-14	7.49541e-14	3.34341e-10	2.16732e-11	1.44216e-12	3.78577e-09	5.81578e-13	3.09551e-08	1.79304e-16	6.47012e-15	7.61377e-13	7.895e-13	1.48453e-10	8.45337e-08	1.96964e-13	2.90261e-12	4.52437e-11	4.33996e-13	1.19224e-14	4.32142e-10	7.05027e-13	2.84007e-13	1.55089e-12	9.53713e-09	9.44486e-09	1.23099e-11	4.68921e-12	8.5849e-11	1921.67	0.000235446	0.000430788	0.000424853	4.69669e-05	0.000500702	0.0797104	1.55461	0.00338993	0.0723357	0.700818	6.63363e-06	0.00566852	0.015532	416.501	0.00164182
6.2535e-13	1.28639e-12	1.06185e-14	9.85747e-16	2.44309e-17	7.87833e-13	3.44882e-14	7.49541e-14	3.34341e-10	2.16732e-11	1.44216e-12	3.78577e-09	5.81578e-13	3.09551e-08	1.79304e-16	6.47012e-15	7.61377e-13	7.895e-13	1.48453e-10	8.45337e-08	1.96964e-13	2.90261e-12	4.52437e-11	4.33996e-13	1.19224e-14	4.32142e-10	7.05027e-13	2.84007e-13	1.55089e-12	9.53713e-09	9.44486e-09	1.23099e-11	4.68921e-12	8.5849e-11	1921.67	0.000235446	0.000430788	0.000424853	4.69669e-05	0.000500702	0.0797104	1.55461	0.00338993	0.0723357	0.700818	6.63363e-06	0.00566852	0.015532	416.501	0.00164182
6.2535e-13	1.28639e-12	1.06185e-14	9.85747e-16	2.44309e-17	7.87833e-13	3.44882e-14	7.49541e-14	3.34341e-10	2.16732e-11	1.44216e-12	3.78577e-09	5.81578e-13	3.09551e-08	1.79304e-16	6.47012e-15	7.61377e-13	7.895e-13	1.48453e-10	8.45337e-08	1.96964e-13	2.90261e-12	4.52437e-11	4.33996e-13	1.19224e-14	4.32142e-10	7.05027e-13	2.84007e-13	1.55089e-12	9.53713e-09	9.44486e-09	1.23099e-11	4.68921e-12	8.5849e-11	1921.67	0.000235446	0.000430788	0.000424853	4.69669e-05	0.000500702	0.0797104	1.55461	0.00338993	0.0723357	0.700818	6.63363e-06	0.00566852	0.015532	416.501	0.00164182
6.2535e-13	1.28639e-12	1.06185e-14	9.85747e-16	2.44309e-17	7.87833e-13	3.44882e-14	7.49541e-14	3.34341e-10	2.16732e-11	1.44216e-12	3.78577e-09	5.81578e-13	3.09551e-08	1.79304e-16	6.47012e-15	7.61377e-13	7.895e-13	1.48453e-10	8.45337e-08	1.96964e-13	2.90261e-12	4.52437e-11	4.33996e-13	1.19224e-14	4.32142e-10	7.05027e-13	2.84007e-13	1.55089e-12	9.53713e-09	9.44486e-09	1.23099e-11	4.68921e-12	8.5849e-11	1921.67	0.000235446	0.000430788	0.000424853	4.69669e-05	0.000500702	0.0797104	1.55461	0.00338993	0.0723357	0.700818	6.63363e-06	0.00566852	0.015532	416.501	0.00164182
6.2535e-13	1.28639e-12	1.06185e-14	9.85747e-16	2.44309e-17	7.87833e-13	3.44882e-14	7.49541e-14	3.34341e-10	2.16732e-11	1.44216e-12	3.78577e-09	5.81578e-13	3.09551e-08	1.79304e-16	6.47012e-15	7.61377e-13	7.895e-13	1.48453e-10	8.45337e-08	1.96964e-13	2.90261e-12	4.52437e-11	4.33996e-13	1.19224e-14	4.32142e-10	7.05027e-13	2.84007e-13	1.55089e-12	9.53713e-09	9.44486e-09	1.23099e-11	4.68921e-12	8.5849e-11	1921.67	0.000235446	0.000430788	0.000424853	4.69669e-05	0.000500702	0.0797104	1.55461	0.00338993	0.0723357	0.700818	6.63363e-06	0.00566852	0.015532	416.501	0.00164182
6.2535e-13	1.28639e-12	1.06185e-14	9.85747e-16	2.44309e-17	7.87833e-13	3.44882e-14	7.49541e-14	3.34341e-10	2.16732e-11	1.44216e-12	3.78577e-09	5.81578e-13	3.09551e-08	1.79304e-16	6.47012e-15	7.61377e-13	7.895e-13	1.48453e-10	8.45337e-08	1.96964e-13	2.90261e-12	4.52437e-11	4.33996e-13	1.19224e-14	4.32142e-10	7.05027e-13	2.84007e-13	1.55089e-12	9.53713e-09	9.44486e-09	1.23099e-11	4.68921e-12	8.5849e-11	1921.67	0.000235446	0.000430788	0.000424853	4.69669e-05	0.000500702	0.0797104	1.55461	0.00338993	0.0723357	0.700818	6.63363e-06	0.00566852	0.015532	416.501	0.00164182
6.2535e-13	1.28639e-12	1.06185e-14	9.85747e-16	2.44309e-17	7.87833e-13	3.44882e-14	7.49541e-14	3.34341e-10	2.16732e-11	1.44216e-12	3.78577e-09	5.81578e-13	3.09551e-08	1.79304e-16	6.47012e-15	7.61377e-13	7.895e-13	1.48453e-10	8.45337e-08	1.96964e-13	2.90261e-12	4.52437e-11	4.33996e-13	1.19224e-14	4.32142e-10	7.05027e-13	2.84007e-13	1.55089e-12	9.53713e-09	9.44486e-09	1.23099e-11	4.68921e-12	8.5849e-11	1921.67	0.000235446	0.000430788	0.000424853	4.69669e-05	0.000500702	0.0797104	1.55461	0.00338993	0.0723357	0.700818	6.63363e-06	0.00566852	0.015532	416.501	0.00164182
6.25372e-13	1.31034e-12	1.64152e-14	1.03101e-15	2.12568e-17	7.71508e-13	3.33341e-14	8.69826e-14	3.91369e-10	2.50619e-11	1.34117e-12	4.47541e-09	4.29875e-13	4.3586e-08	3.0188e-16	4.31822e-15	9.36897e-13	8.35383e-13	1.2384e-10	7.94956e-08	2.31367e-13	2.1047e-12	3.48708e-11	4.24886e-13	1.28259e-14	4.15908e-10	7.92947e-13	1.97688e-13	1.9315e-12	1.72778e-08	5.95512e-09	2.26582e-11	3.66902e-12	1.00708e-10	2692.16	0.000223188	0.000444027	0.000358804	6.59647e-05	0.000383927	0.0794901	1.50463	0.00400901	0.124459	0.717096	3.63452e-06	0.00711653	0.0242711	403.42	0.0019846
6.2535e-13	1.28639e-12	1.06185e-14	9.85747e-16	2.44309e-17	7.87833e-13	3.44882e-14	7.49541e-14	3.34341e-10	2.16732e-11	1.44216e-12	3.78577e-09	5.81578e-13	3.09551e-08	1.79304e-16	6.47012e-15	7.61377e-13	7.895e-13	1.48453e-10	8.45337e-08	1.96964e-13	2.90261e-12	4.52437e-11	4.33996e-13	1.19224e-14	4.32142e-10	7.05027e-13	2.84007e-13	1.55089e-12	9.53713e-09	9.44486e-09	1.23099e-11	4.68921e-12	8.5849e-11	1921.67	0.000235446	0.000430788	0.000424853	4.69669e-05	0.000500702	0.0797104	1.55461	0.00338993	0.0723357	0.700818	6.63363e-06	0.00566852	0.015532	416.501	0.00164182
6.25912e-13	8.85046e-13	1.55258e-14	6.97428e-16	2.92414e-17	7.90791e-13	4.88935e-14	8.97221e-14	2.77595e-10	2.84741e-11	1.3462e-12	4.14158e-09	3.83302e-13	4.85666e-08	2.30876e-16	3.69486e-15	4.78641e-13	7.52251e-13	1.37972e-10	8.69591e-08	1.1308e-13	3.80412e-12	5.47487e-11	4.40707e-13	7.06263e-15	5.36361e-10	7.45266e-13	1.50072e-13	1.13521e-12	3.75169e-09	9.43593e-09	9.85933e-12	4.76842e-12	1.40204e-10	3094.12	0.000217509	0.000446799	0.000509946	3.69194e-05	0.000471194	0.0370697	2.89796	0.000990936	0.0451046	1.675	8.37233e-06	0.00590574	0.00898955	217.082	0.00193739
6.2535e-13	1.28639e-12	1.06185e-14	9.85747e-16	2.44309e-17	7.87833e-13	3.44882e-14	7.49541e-14	3.34341e-10	2.16732e-11	1.44216e-12	3.78577e-09	5.81578e-13	3.09551e-08	1.79304e-16	6.47012e-15	7.61377e-13	7.895e-13	1.48453e-10	8.45337e-08	1.96964e-13	2.90261e-12	4.52437e-11	4.33996e-13	1.19224e-14	4.32142e-10	7.05027e-13	2.84007e-13	1.55089e-12	9.53713e-09	9.44486e-09	1.23099e-11	4.68921e-12	8.5849e-11	1921.67	0.000235446	0.000430788	0.000424853	4.69669e-05	0.000500702	0.0797104	1.55461	0.00338993	0.0723357	0.700818	6.63363e-06	0.00566852	0.015532	416.501	0.00164182
6.2535e-13	1.28639e-12	1.06185e-14	9.85747e-16	2.44309e-17	7.87833e-13	3.44882e-14	7.49541e-14	3.34341e-10	2.16732e-11	1.44216e-12	3.78577e-09	5.81578e-13	3.09551e-08	1.79304e-16	6.47012e-15	7.61377e-13	7.895e-13	1.48453e-10	8.45337e-08	1.96964e-13	2.90261e-12	4.52437e-11	4.33996e-13	1.19224e-14	4.32142e-10	7.05027e-13	2.84007e-13	1.55089e-12	9.53713e-09	9.44486e-09	1.23099e-11	4.68921e-12	8.5849e-11	1921.67	0.000235446	0.000430788	0.000424853	4.69669e-05	0.000500702	0.0797104	1.55461	0.00338993	0.0723357	0.700818	6.63363e-06	0.00566852	0.015532	416.501	0.00164182
6.2535e-13	1.28639e-12	1.06185e-14	9.85747e-16	2.44309e-17	7.87833e-13	3.44882e-14	7.49541e-14	3.34341e-10	2.16732e-11	1.44216e-12	3.78577e-09	5.81578e-13	3.09551e-08	1.79304e-16	6.47012e-15	7.61377e-13	7.895e-13	1.48453e-10	8.45337e-08	1.96964e-13	2.90261e-12	4.52437e-11	4.33996e-13	1.19224e-14	4.32142e-10	7.05027e-13	2.84007e-13	1.55089e-12	9.53713e-09	9.44486e-09	1.23099e-11	4.68921e-12	8.5849e-11	1921.67	0.000235446	0.000430788	0.000424853	4.69669e-05	0.000500702	0.0797104	1.55461	0.00338993	0.0723357	0.700818	6.63363e-06	0.00566852	0.015532	416.501	0.00164182
6.2535e-13	1.28639e-12	1.06185e-14	9.85747e-16	2.44309e-17	7.87833e-13	3.44882e-14	7.49541e-14	3.34341e-10	2.16732e-11	1.44216e-12	3.78577e-09	5.81578e-13	3.09551e-08	1.79304e-16	6.47012e-15	7.61377e-13	7.895e-13	1.48453e-10	8.45337e-08	1.96964e-13	2.90261e-12	4.52437e-11	4.33996e-13	1.19224e-14	4.32142e-10	7.05027e-13	2.84007e-13	1.55089e-12	9.53713e-09	9.44486e-09	1.23099e-11	4.68921e-12	8.5849e-11	1921.67	0.000235446	0.000430788	0.000424853	4.69669e-05	0.000500702	0.0797104	1.55461	0.00338993	0.0723357	0.700818	6.63363e-06	0.00566852	0.015532	416.501	0.00164182
6.2535e-13	1.28639e-12	1.06185e-14	9.85747e-16	2.44309e-17	7.87833e-13	3.44882e-14	7.49541e-14	3.34341e-10	2.16732e-11	1.44216e-12	3.78577e-09	5.81578e-13	3.09551e-08	1.79304e-16	6.47012e-15	7.61377e-13	7.895e-13	1.48453e-10	8.45337e-08	1.96964e-13	2.90261e-12	4.52437e-11	4.33996e-13	1.19224e-14	4.32142e-10	7.05027e-13	2.84007e-13	1.55089e-12	9.53713e-09	9.44486e-09	1.23099e-11	4.68921e-12	8.5849e-11	1921.67	0.000235446	0.000430788	0.000424853	4.69669e-05	0.000500702	0.0797104	1.55461	0.00338993	0.0723357	0.700818	6.63363e-06	0.00566852	0.015532	416.501	0.00164182
6.2535e-13	1.28639e-12	1.06185e-14	9.85747e-16	2.44309e-17	7.87833e-13	3.44882e-14	7.49541e-14	3.34341e-10	2.16732e-11	1.44216e-12	3.78577e-09	5.81578e-13	3.09551e-08	1.79304e-16	6.47012e-15	7.61377e-13	7.895e-13	1.48453e-10	8.45337e-08	1.96964e-13	2.90261e-12	4.52437e-11	4.33996e-13	1.19224e-14	4.32142e-10	7.05027e-13	2.84007e-13	1.55089e-12	9.53713e-09	9.44486e-09	1.23099e-11	4.68921e-12	8.5849e-11	1921.67	0.000235446	0.000430788	0.000424853	4.69669e-05	0.000500702	0.0797104	1.55461	0.00338993	0.0723357	0.700818	6.63363e-06	0.00566852	0.015532	416.501	0.00164182
6.2535e-13	1.28639e-12	1.06185e-14	9.85747e-16	2.44309e-17	7.87833e-13	3.44882e-14	7.49541e-14	3.34341e-10	2.16732e-11	1.44216e-12	3.78577e-09	5.81578e-13	3.09551e-08	1.79304e-16	6.47012e-15	7.61377e-13	7.895e-13	1.48453e-10	8.45337e-08	1.96964e-13	2.90261e-12	4.52437e-11	4.33996e-13	1.19224e-14	4.32142e-10	7.05027e-13	2.84007e-13	1.55089e-12	9.53713e-09	9.44486e-09	1.23099e-11	4.68921e-12	8.5849e-11	1921.67	0.000235446	0.000430788	0.000424853	4.69669e-05	0.000500702	0.0797104	1.55461	0.00338993	0.0723357	0.700818	6.63363e-06	0.00566852	0.015532	416.501	0.00164182
6.2535e-13	1.28639e-12	1.06185e-14	9.85747e-16	2.44309e-17	7.87833e-13	3.44882e-14	7.49541e-14	3.34341e-10	2.16732e-11	1.44216e-12	3.78577e-09	5.81578e-13	3.09551e-08	1.79304e-16	6.47012e-15	7.61377e-13	7.895e-13	1.48453e-10	8.45337e-08	1.96964e-13	2.90261e-12	4.52437e-11	4.33996e-13	1.19224e-14	4.32142e-10	7.05027e-13	2.84007e-13	1.55089e-12	9.53713e-09	9.44486e-09	1.23099e-11	4.68921e-12	8.5849e-11	1921.67	0.000235446	0.000430788	0.000424853	4.69669e-05	0.000500702	0.0797104	1.55461	0.00338993	0.0723357	0.700818	6.63363e-06	0.00566852	0.015532	416.501	0.00164182
6.21309e-13	1.2574e-12	3.49643e-14	6.16104e-16	5.78772e-17	6.95925e-13	4.49908e-14	4.38623e-14	6.21751e-10	1.81491e-11	1.3304e-12	3.39296e-09	6.92734e-13	3.89841e-08	1.02835e-16	5.45092e-15	4.4688e-13	7.67526e-13	9.55254e-11	7.56486e-08	1.48388e-13	3.12089e-12	5.03315e-11	4.26748e-13	9.31116e-15	3.90828e-10	7.04073e-13	2.09846e-13	1.03728e-12	1.76645e-08	8.71536e-09	4.98784e-12	3.4885e-12	9.99706e-11	2212.27	0.000223399	0.000448468	0.000927608	7.23336e-05	0.000523124	0.110873	2.2642	0.00492413	0.0889258	1.23362	1.81334e-06	0.0053183	0.0250743	288.402	0.00103311
6.2535e-13	1.28639e-12	1.06185e-14	9.85747e-16	2.44309e-17	7.87833e-13	3.44882e-14	7.49541e-14	3.34341e-10	2.16732e-11	1.44216e-12	3.78577e-09	5.81578e-13	3.09551e-08	1.79304e-16	6.47012e-15	7.61377e-13	7.895e-13	1.48453e-10	8.45337e-08	1.96964e-13	2.90261e-12	4.52437e-11	4.33996e-13	1.19224e-14	4.32142e-10	7.05027e-13	2.84007e-13	1.55089e-12	9.53713e-09	9.44486e-09	1.23099e-11	4.68921e-12	8.5849e-11	1921.67	0.000235446	0.000430788	0.000424853	4.69669e-05	0.000500702	0.0797104	1.55461	0.00338993	0.0723357	0.700818	6.63363e-06	0.00566852	0.015532	416.501	0.00164182
6.2535e-13	1.28639e-12	1.06185e-14	9.85747e-16	2.44309e-17	7.87833e-13	3.44882e-14	7.49541e-14	3.34341e-10	2.16732e-11	1.44216e-12	3.78577e-09	5.81578e-13	3.09551e-08	1.79304e-16	6.47012e-15	7.61377e-13	7.895e-13	1.48453e-10	8.45337e-08	1.96964e-13	2.90261e-12	4.52437e-11	4.33996e-13	1.19224e-14	4.32142e-10	7.05027e-13	2.84007e-13	1.55089e-12	9.53713e-09	9.44486e-09	1.23099e-11	4.68921e-12	8.5849e-11	1921.67	0.000235446	0.000430788	0.000424853	4.69669e-05	0.000500702	0.0797104	1.55461	0.00338993	0.0723357	0.700818	6.63363e-06	0.00566852	0.015532	416.501	0.00164182
6.2535e-13	1.28639e-12	1.06185e-14	9.85747e-16	2.44309e-17	7.87833e-13	3.44882e-14	7.49541e-14	3.34341e-10	2.16732e-11	1.44216e-12	3.78577e-09	5.81578e-13	3.09551e-08	1.79304e-16	6.47012e-15	7.61377e-13	7.895e-13	1.48453e-10	8.45337e-08	1.96964e-13	2.90261e-12	4.52437e-11	4.33996e-13	1.19224e-14	4.32142e-10	7.05027e-13	2.84007e-13	1.55089e-12	9.53713e-09	9.44486e-09	1.23099e-11	4.68921e-12	8.5849e-11	1921.67	0.000235446	0.000430788	0.000424853	4.69669e-05	0.000500702	0.0797104	1.55461	0.00338993	0.0723357	0.700818	6.63363e-06	0.00566852	0.015532	416.501	0.00164182
6.2535e-13	1.28639e-12	1.06185e-14	9.85747e-16	2.44309e-17	7.87833e-13	3.44882e-14	7.49541e-14	3.34341e-10	2.16732e-11	1.44216e-12	3.78577e-09	5.81578e-13	3.09551e-08	1.79304e-16	6.47012e-15	7.61377e-13	7.895e-13	1.48453e-10	8.45337e-08	1.96964e-13	2.90261e-12	4.52437e-11	4.33996e-13	1.19224e-14	4.32142e-10	7.05027e-13	2.84007e-13	1.55089e-12	9.53713e-09	9.44486e-09	1.23099e-11	4.68921e-12	8.5849e-11	1921.67	0.000235446	0.000430788	0.000424853	4.69669e-05	0.000500702	0.0797104	1.55461	0.00338993	0.0723357	0.700818	6.63363e-06	0.00566852	0.015532	416.501	0.00164182
6.2535e-13	1.28639e-12	1.06185e-14	9.85747e-16	2.44309e-17	7.87833e-13	3.44882e-14	7.49541e-14	3.34341e-10	2.16732e-11	1.44216e-12	3.78577e-09	5.81578e-13	3.09551e-08	1.79304e-16	6.47012e-15	7.61377e-13	7.895e-13	1.48453e-10	8.45337e-08	1.96964e-13	2.90261e-12	4.52437e-11	4.33996e-13	1.19224e-14	4.32142e-10	7.05027e-13	2.84007e-13	1.55089e-12	9.53713e-09	9.44486e-09	1.23099e-11	4.68921e-12	8.5849e-11	1921.67	0.000235446	0.000430788	0.000424853	4.69669e-05	0.000500702	0.0797104	1.55461	0.00338993	0.0723357	0.700818	6.63363e-06	0.00566852	0.015532	416.501	0.00164182
6.2535e-13	1.28639e-12	1.06185e-14	9.85747e-16	2.44309e-17	7.87833e-13	3.44882e-14	7.49541e-14	3.34341e-10	2.16732e-11	1.44216e-12	3.78577e-09	5.81578e-13	3.09551e-08	1.79304e-16	6.47012e-15	7.61377e-13	7.895e-13	1.48453e-10	8.45337e-08	1.96964e-13	2.90261e-12	4.52437e-11	4.33996e-13	1.19224e-14	4.32142e-10	7.05027e-13	2.84007e-13	1.55089e-12	9.53713e-09	9.44486e-09	1.23099e-11	4.68921e-12	8.5849e-11	1921.67	0.000235446	0.000430788	0.000424853	4.69669e-05	0.000500702	0.0797104	1.55461	0.00338993	0.0723357	0.700818	6.63363e-06	0.00566852	0.015532	416.501	0.00164182
6.2535e-13	1.28639e-12	1.06185e-14	9.85747e-16	2.44309e-17	7.87833e-13	3.44882e-14	7.49541e-14	3.34341e-10	2.16732e-11	1.44216e-12	3.78577e-09	5.81578e-13	3.09551e-08	1.79304e-16	6.47012e-15	7.61377e-13	7.895e-13	1.48453e-10	8.45337e-08	1.96964e-13	2.90261e-12	4.52437e-11	4.33996e-13	1.19224e-14	4.32142e-10	7.05027e-13	2.84007e-13	1.55089e-12	9.53713e-09	9.44486e-09	1.23099e-11	4.68921e-12	8.5849e-11	1921.67	0.000235446	0.000430788	0.000424853	4.69669e-05	0.000500702	0.0797104	1.55461	0.00338993	0.0723357	0.700818	6.63363e-06	0.00566852	0.015532	416.501	0.00164182
6.2535e-13	1.28639e-12	1.06185e-14	9.85747e-16	2.44309e-17	7.87833e-13	3.44882e-14	7.49541e-14	3.34341e-10	2.16732e-11	1.44216e-12	3.78577e-09	5.81578e-13	3.09551e-08	1.79304e-16	6.47012e-15	7.61377e-13	7.895e-13	1.48453e-10	8.45337e-08	1.96964e-13	2.90261e-12	4.52437e-11	4.33996e-13	1.19224e-14	4.32142e-10	7.05027e-13	2.84007e-13	1.55089e-12	9.53713e-09	9.44486e-09	1.23099e-11	4.68921e-12	8.5849e-11	1921.67	0.000235446	0.000430788	0.000424853	4.69669e-05	0.000500702	0.0797104	1.55461	0.00338993	0.0723357	0.700818	6.63363e-06	0.00566852	0.015532	416.501	0.00164182
6.25828e-13	1.55596e-12	1.13937e-14	1.52661e-15	8.96405e-17	7.02538e-13	3.1352e-14	1.05787e-13	3.9837e-10	1.80089e-11	1.30546e-12	3.97525e-09	9.16548e-13	3.00676e-08	2.15861e-16	8.32159e-15	6.74342e-13	7.95675e-13	2.07595e-10	8.57589e-08	1.44319e-13	2.97275e-12	4.59927e-11	4.45552e-13	1.44159e-14	3.41487e-10	7.8663e-13	1.78642e-13	1.32565e-12	1.45355e-08	1.22348e-08	9.98993e-12	3.8272e-12	1.07479e-10	1202.85	0.000217107	0.000441986	0.000109428	7.34098e-05	0.000236663	0.16061	2.26349	0.00461343	0.0884197	0.760205	5.69621e-06	0.00543497	0.0165904	401.44	0.00163998
6.2535e-13	1.28639e-12	1.06185e-14	9.85747e-16	2.44309e-17	7.87833e-13	3.44882e-14	7.49541e-14	3.34341e-10	2.16732e-11	1.44216e-12	3.78577e-09	5.81578e-13	3.09551e-08	1.79304e-16	6.47012e-15	7.61377e-13	7.895e-13	1.48453e-10	8.45337e-08	1.96964e-13	2.90261e-12	4.52437e-11	4.33996e-13	1.19224e-14	4.32142e-10	7.05027e-13	2.84007e-13	1.55089e-12	9.53713e-09	9.44486e-09	1.23099e-11	4.68921e-12	8.5849e-11	1921.67	0.000235446	0.000430788	0.000424853	4.69669e-05	0.000500702	0.0797104	1.55461	0.00338993	0.0723357	0.700818	6.63363e-06	0.00566852	0.015532	416.501	0.00164182
6.2535e-13	1.28639e-12	1.06185e-14	9.85747e-16	2.44309e-17	7.87833e-13	3.44882e-14	7.49541e-14	3.34341e-10	2.16732e-11	1.44216e-12	3.78577e-09	5.81578e-13	3.09551e-08	1.79304e-16	6.47012e-15	7.61377e-13	7.895e-13	1.48453e-10	8.45337e-08	1.96964e-13	2.90261e-12	4.52437e-11	4.33996e-13	1.19224e-14	4.32142e-10	7.05027e-13	2.84007e-13	1.55089e-12	9.53713e-09	9.44486e-09	1.23099e-11	4.68921e-12	8.5849e-11	1921.67	0.000235446	0.000430788	0.000424853	4.69669e-05	0.000500702	0.0797104	1.55461	0.00338993	0.0723357	0.700818	6.63363e-06	0.00566852	0.015532	416.501	0.00164182
6.23894e-13	1.13981e-12	2.42268e-14	8.66789e-16	2.49251e-17	7.77206e-13	3.56839e-14	6.89009e-14	3.24959e-10	2.09399e-11	1.36517e-12	4.97808e-09	2.86532e-13	3.19157e-08	5.23958e-17	3.3351e-15	5.40364e-13	7.45778e-13	1.17526e-10	6.76551e-08	1.23438e-13	2.07521e-12	5.22222e-11	4.00931e-13	1.84937e-14	3.50931e-10	7.65813e-13	2.15433e-13	2.39524e-12	1.37674e-08	1.29641e-08	9.27697e-12	8.30966e-12	8.17262e-11	4343.49	0.000224647	0.000422056	0.000500964	5.9615e-05	0.00048799	0.0788796	2.04938	0.00657514	0.0527646	1.07629	9.18049e-06	0.00606441	0.0145237	259.782	0.00151667
6.2535e-13	1.28639e-12	1.06185e-14	9.85747e-16	2.44309e-17	7.87833e-13	3.44882e-14	7.49541e-14	3.34341e-10	2.16732e-11	1.44216e-12	3.78577e-09	5.81578e-13	3.09551e-08	1.79304e-16	6.47012e-15	7.61377e-13	7.895e-13	1.48453e-10	8.45337e-08	1.96964e-13	2.90261e-12	4.52437e-11	4.33996e-13	1.19224e-14	4.32142e-10	7.05027e-13	2.84007e-13	1.55089e-12	9.53713e-09	9.44486e-09	1.23099e-11	4.68921e-12	8.5849e-11	1921.67	0.000235446	0.000430788	0.000424853	4.69669e-05	0.000500702	0.0797104	1.55461	0.00338993	0.0723357	0.700818	6.63363e-06	0.00566852	0.015532	416.501	0.00164182
6.2535e-13	1.28639e-12	1.06185e-14	9.85747e-16	2.44309e-17	7.87833e-13	3.44882e-14	7.49541e-14	3.34341e-10	2.16732e-11	1.44216e-12	3.78577e-09	5.81578e-13	3.09551e-08	1.79304e-16	6.47012e-15	7.61377e-13	7.895e-13	1.48453e-10	8.45337e-08	1.96964e-13	2.90261e-12	4.52437e-11	4.33996e-13	1.19224e-14	4.32142e-10	7.05027e-13	2.84007e-13	1.55089e-12	9.53713e-09	9.44486e-09	1.23099e-11	4.68921e-12	8.5849e-11	1921.67	0.000235446	0.000430788	0.000424853	4.69669e-05	0.000500702	0.0797104	1.55461	0.00338993	0.0723357	0.700818	6.63363e-06	0.00566852	0.015532	416.501	0.00164182
6.25331e-13	1.19174e-12	1.10989e-14	1.00121e-15	2.41704e-17	7.82387e-13	4.40422e-14	6.90429e-14	2.26537e-10	2.4001e-11	1.33526e-12	2.21271e-09	3.2751e-13	2.7487e-08	1.20481e-16	3.73959e-15	6.17082e-13	7.40369e-13	8.98621e-11	9.04376e-08	2.11476e-13	2.62193e-12	3.66569e-11	3.86707e-13	9.35574e-15	7.49966e-10	7.91912e-13	1.96561e-13	9.16994e-13	9.21062e-09	8.42724e-09	1.9421e-11	4.34696e-12	4.1692e-11	1963.26	0.000214696	0.000433996	0.000493046	4.81454e-05	0.000690229	0.0606123	1.51021	0.00409954	0.0414212	0.482206	9.04633e-06	0.00742707	0.0105762	376.093	0.00164112
6.2535e-13	1.28639e-12	1.06185e-14	9.85747e-16	2.44309e-17	7.87833e-13	3.44882e-14	7.49541e-14	3.34341e-10	2.16732e-11	1.44216e-12	3.78577e-09	5.81578e-13	3.09551e-08	1.79304e-16	6.47012e-15	7.61377e-13	7.895e-13	1.48453e-10	8.45337e-08	1.96964e-13	2.90261e-12	4.52437e-11	4.33996e-13	1.19224e-14	4.32142e-10	7.05027e-13	2.84007e-13	1.55089e-12	9.53713e-09	9.44486e-09	1.23099e-11	4.68921e-12	8.5849e-11	1921.67	0.000235446	0.000430788	0.000424853	4.69669e-05	0.000500702	0.0797104	1.55461	0.00338993	0.0723357	0.700818	6.63363e-06	0.00566852	0.015532	416.501	0.00164182
6.2535e-13	1.28639e-12	1.06185e-14	9.85747e-16	2.44309e-17	7.87833e-13	3.44882e-14	7.49541e-14	3.34341e-10	2.16732e-11	1.44216e-12	3.78577e-09	5.81578e-13	3.09551e-08	1.79304e-16	6.47012e-15	7.61377e-13	7.895e-13	1.48453e-10	8.45337e-08	1.96964e-13	2.90261e-12	4.52437e-11	4.33996e-13	1.19224e-14	4.32142e-10	7.05027e-13	2.84007e-13	1.55089e-12	9.53713e-09	9.44486e-09	1.23099e-11	4.68921e-12	8.5849e-11	1921.67	0.000235446	0.000430788	0.000424853	4.69669e-05	0.000500702	0.0797104	1.55461	0.00338993	0.0723357	0.700818	6.63363e-06	0.00566852	0.015532	416.501	0.00164182
6.2535e-13	1.28639e-12	1.06185e-14	9.85747e-16	2.44309e-17	7.87833e-13	3.44882e-14	7.49541e-14	3.34341e-10	2.16732e-11	1.44216e-12	3.78577e-09	5.81578e-13	3.09551e-08	1.79304e-16	6.47012e-15	7.61377e-13	7.895e-13	1.48453e-10	8.45337e-08	1.96964e-13	2.90261e-12	4.52437e-11	4.33996e-13	1.19224e-14	4.32142e-10	7.05027e-13	2.84007e-13	1.55089e-12	9.53713e-09	9.44486e-09	1.23099e-11	4.68921e-12	8.5849e-11	1921.67	0.000235446	0.000430788	0.000424853	4.69669e-05	0.000500702	0.0797104	1.55461	0.00338993	0.0723357	0.700818	6.63363e-06	0.00566852	0.015532	416.501	0.00164182
6.2535e-13	1.28639e-12	1.06185e-14	9.85747e-16	2.44309e-17	7.87833e-13	3.44882e-14	7.49541e-14	3.34341e-10	2.16732e-11	1.44216e-12	3.78577e-09	5.81578e-13	3.09551e-08	1.79304e-16	6.47012e-15	7.61377e-13	7.895e-13	1.48453e-10	8.45337e-08	1.96964e-13	2.90261e-12	4.52437e-11	4.33996e-13	1.19224e-14	4.32142e-10	7.05027e-13	2.84007e-13	1.55089e-12	9.53713e-09	9.44486e-09	1.23099e-11	4.68921e-12	8.5849e-11	1921.67	0.000235446	0.000430788	0.000424853	4.69669e-05	0.000500702	0.0797104	1.55461	0.00338993	0.0723357	0.700818	6.63363e-06	0.00566852	0.015532	416.501	0.00164182
6.2535e-13	1.28639e-12	1.06185e-14	9.85747e-16	2.44309e-17	7.87833e-13	3.44882e-14	7.49541e-14	3.34341e-10	2.16732e-11	1.44216e-12	3.78577e-09	5.81578e-13	3.09551e-08	1.79304e-16	6.47012e-15	7.61377e-13	7.895e-13	1.48453e-10	8.45337e-08	1.96964e-13	2.90261e-12	4.52437e-11	4.33996e-13	1.19224e-14	4.32142e-10	7.05027e-13	2.84007e-13	1.55089e-12	9.53713e-09	9.44486e-09	1.23099e-11	4.68921e-12	8.5849e-11	1921.67	0.000235446	0.000430788	0.000424853	4.69669e-05	0.000500702	0.0797104	1.55461	0.00338993	0.0723357	0.700818	6.63363e-06	0.00566852	0.015532	416.501	0.00164182
6.2535e-13	1.28639e-12	1.06185e-14	9.85747e-16	2.44309e-17	7.87833e-13	3.44882e-14	7.49541e-14	3.34341e-10	2.16732e-11	1.44216e-12	3.78577e-09	5.81578e-13	3.09551e-08	1.79304e-16	6.47012e-15	7.61377e-13	7.895e-13	1.48453e-10	8.45337e-08	1.96964e-13	2.90261e-12	4.52437e-11	4.33996e-13	1.19224e-14	4.32142e-10	7.05027e-13	2.84007e-13	1.55089e-12	9.53713e-09	9.44486e-09	1.23099e-11	4.68921e-12	8.5849e-11	1921.67	0.000235446	0.000430788	0.000424853	4.69669e-05	0.000500702	0.0797104	1.55461	0.00338993	0.0723357	0.700818	6.63363e-06	0.00566852	0.015532	416.501	0.00164182
6.2535e-13	1.28639e-12	1.06185e-14	9.85747e-16	2.44309e-17	7.87833e-13	3.44882e-14	7.49541e-14	3.34341e-10	2.16732e-11	1.44216e-12	3.78577e-09	5.81578e-13	3.09551e-08	1.79304e-16	6.47012e-15	7.61377e-13	7.895e-13	1.48453e-10	8.45337e-08	1.96964e-13	2.90261e-12	4.52437e-11	4.33996e-13	1.19224e-14	4.32142e-10	7.05027e-13	2.84007e-13	1.55089e-12	9.53713e-09	9.44486e-09	1.23099e-11	4.68921e-12	8.5849e-11	1921.67	0.000235446	0.000430788	0.000424853	4.69669e-05	0.000500702	0.0797104	1.55461	0.00338993	0.0723357	0.700818	6.63363e-06	0.00566852	0.015532	416.501	0.00164182
6.2535e-13	1.28639e-12	1.06185e-14	9.85747e-16	2.44309e-17	7.87833e-13	3.44882e-14	7.49541e-14	3.34341e-10	2.16732e-11	1.44216e-12	3.78577e-09	5.81578e-13	3.09551e-08	1.79304e-16	6.47012e-15	7.61377e-13	7.895e-13	1.48453e-10	8.45337e-08	1.96964e-13	2.90261e-12	4.52437e-11	4.33996e-13	1.19224e-14	4.32142e-10	7.05027e-13	2.84007e-13	1.55089e-12	9.53713e-09	9.44486e-09	1.23099e-11	4.68921e-12	8.5849e-11	1921.67	0.000235446	0.000430788	0.000424853	4.69669e-05	0.000500702	0.0797104	1.55461	0.00338993	0.0723357	0.700818	6.63363e-06	0.00566852	0.015532	416.501	0.00164182
6.2535e-13	1.28639e-12	1.06185e-14	9.85747e-16	2.44309e-17	7.87833e-13	3.44882e-14	7.49541e-14	3.34341e-10	2.16732e-11	1.44216e-12	3.78577e-09	5.81578e-13	3.09551e-08	1.79304e-16	6.47012e-15	7.61377e-13	7.895e-13	1.48453e-10	8.45337e-08	1.96964e-13	2.90261e-12	4.52437e-11	4.33996e-13	1.19224e-14	4.32142e-10	7.05027e-13	2.84007e-13	1.55089e-12	9.53713e-09	9.44486e-09	1.23099e-11	4.68921e-12	8.5849e-11	1921.67	0.000235446	0.000430788	0.000424853	4.69669e-05	0.000500702	0.0797104	1.55461	0.00338993	0.0723357	0.700818	6.63363e-06	0.00566852	0.015532	416.501	0.00164182
6.2535e-13	1.28639e-12	1.06185e-14	9.85747e-16	2.44309e-17	7.87833e-13	3.44882e-14	7.49541e-14	3.34341e-10	2.16732e-11	1.44216e-12	3.78577e-09	5.81578e-13	3.09551e-08	1.79304e-16	6.47012e-15	7.61377e-13	7.895e-13	1.48453e-10	8.45337e-08	1.96964e-13	2.90261e-12	4.52437e-11	4.33996e-13	1.19224e-14	4.32142e-10	7.05027e-13	2.84007e-13	1.55089e-12	9.53713e-09	9.44486e-09	1.23099e-11	4.68921e-12	8.5849e-11	1921.67	0.000235446	0.000430788	0.000424853	4.69669e-05	0.000500702	0.0797104	1.55461	0.00338993	0.0723357	0.700818	6.63363e-06	0.00566852	0.015532	416.501	0.00164182
6.2535e-13	1.28639e-12	1.06185e-14	9.85747e-16	2.44309e-17	7.87833e-13	3.44882e-14	7.49541e-14	3.34341e-10	2.16732e-11	1.44216e-12	3.78577e-09	5.81578e-13	3.09551e-08	1.79304e-16	6.47012e-15	7.61377e-13	7.895e-13	1.48453e-10	8.45337e-08	1.96964e-13	2.90261e-12	4.52437e-11	4.33996e-13	1.19224e-14	4.32142e-10	7.05027e-13	2.84007e-13	1.55089e-12	9.53713e-09	9.44486e-09	1.23099e-11	4.68921e-12	8.5849e-11	1921.67	0.000235446	0.000430788	0.000424853	4.69669e-05	0.000500702	0.0797104	1.55461	0.00338993	0.0723357	0.700818	6.63363e-06	0.00566852	0.015532	416.501	0.00164182
6.2535e-13	1.28639e-12	1.06185e-14	9.85747e-16	2.44309e-17	7.87833e-13	3.44882e-14	7.49541e-14	3.34341e-10	2.16732e-11	1.44216e-12	3.78577e-09	5.81578e-13	3.09551e-08	1.79304e-16	6.47012e-15	7.61377e-13	7.895e-13	1.48453e-10	8.45337e-08	1.96964e-13	2.90261e-12	4.52437e-11	4.33996e-13	1.19224e-14	4.32142e-10	7.05027e-13	2.84007e-13	1.55089e-12	9.53713e-09	9.44486e-09	1.23099e-11	4.68921e-12	8.5849e-11	1921.67	0.000235446	0.000430788	0.000424853	4.69669e-05	0.000500702	0.0797104	1.55461	0.00338993	0.0723357	0.700818	6.63363e-06	0.00566852	0.015532	416.501	0.00164182
6.2535e-13	1.28639e-12	1.06185e-14	9.85747e-16	2.44309e-17	7.87833e-13	3.44882e-14	7.49541e-14	3.34341e-10	2.16732e-11	1.44216e-12	3.78577e-09	5.81578e-13	3.09551e-08	1.79304e-16	6.47012e-15	7.61377e-13	7.895e-13	1.48453e-10	8.45337e-08	1.96964e-13	2.90261e-12	4.52437e-11	4.33996e-13	1.19224e-14	4.32142e-10	7.05027e-13	2.84007e-13	1.55089e-12	9.53713e-09	9.44486e-09	1.23099e-11	4.68921e-12	8.5849e-11	1921.67	0.000235446	0.000430788	0.000424853	4.69669e-05	0.000500702	0.0797104	1.55461	0.00338993	0.0723357	0.700818	6.63363e-06	0.00566852	0.015532	416.501	0.00164182
6.2535e-13	1.28639e-12	1.06185e-14	9.85747e-16	2.44309e-17	7.87833e-13	3.44882e-14	7.49541e-14	3.34341e-10	2.16732e-11	1.44216e-12	3.78577e-09	5.81578e-13	3.09551e-08	1.79304e-16	6.47012e-15	7.61377e-13	7.895e-13	1.48453e-10	8.45337e-08	1.96964e-13	2.90261e-12	4.52437e-11	4.33996e-13	1.19224e-14	4.32142e-10	7.05027e-13	2.84007e-13	1.55089e-12	9.53713e-09	9.44486e-09	1.23099e-11	4.68921e-12	8.5849e-11	1921.67	0.000235446	0.000430788	0.000424853	4.69669e-05	0.000500702	0.0797104	1.55461	0.00338993	0.0723357	0.700818	6.63363e-06	0.00566852	0.015532	416.501	0.00164182
6.2535e-13	1.28639e-12	1.06185e-14	9.85747e-16	2.44309e-17	7.87833e-13	3.44882e-14	7.49541e-14	3.34341e-10	2.16732e-11	1.44216e-12	3.78577e-09	5.81578e-13	3.09551e-08	1.79304e-16	6.47012e-15	7.61377e-13	7.895e-13	1.48453e-10	8.45337e-08	1.96964e-13	2.90261e-12	4.52437e-11	4.33996e-13	1.19224e-14	4.32142e-10	7.05027e-13	2.84007e-13	1.55089e-12	9.53713e-09	9.44486e-09	1.23099e-11	4.68921e-12	8.5849e-11	1921.67	0.000235446	0.000430788	0.000424853	4.69669e-05	0.000500702	0.0797104	1.55461	0.00338993	0.0723357	0.700818	6.63363e-06	0.00566852	0.015532	416.501	0.00164182
6.2535e-13	1.28639e-12	1.06185e-14	9.85747e-16	2.44309e-17	7.87833e-13	3.44882e-14	7.49541e-14	3.34341e-10	2.16732e-11	1.44216e-12	3.78577e-09	5.81578e-13	3.09551e-08	1.79304e-16	6.47012e-15	7.61377e-13	7.895e-13	1.48453e-10	8.45337e-08	1.96964e-13	2.90261e-12	4.52437e-11	4.33996e-13	1.19224e-14	4.32142e-10	7.05027e-13	2.84007e-13	1.55089e-12	9.53713e-09	9.44486e-09	1.23099e-11	4.68921e-12	8.5849e-11	1921.67	0.000235446	0.000430788	0.000424853	4.69669e-05	0.000500702	0.0797104	1.55461	0.00338993	0.0723357	0.700818	6.63363e-06	0.00566852	0.015532	416.501	0.00164182
6.24194e-13	1.71337e-12	1.3121e-14	7.94283e-16	1.63786e-17	8.51891e-13	3.12216e-14	7.49047e-14	2.85974e-10	1.42053e-11	1.40579e-12	7.16671e-09	1.82188e-13	3.37596e-08	4.74198e-16	3.95987e-15	5.89252e-13	7.30157e-13	8.11225e-11	9.04867e-08	3.67297e-13	3.04756e-12	5.0155e-11	4.00934e-13	1.30366e-14	6.38127e-10	5.93906e-13	2.74054e-13	5.36403e-13	1.37311e-08	8.83733e-09	9.97628e-12	2.53599e-12	1.31766e-10	1137.66	0.000212435	0.000460699	0.00035304	6.38777e-05	0.000386518	0.0955663	0.967311	0.00391196	0.0730886	0.322373	7.74097e-06	0.00973291	0.0117111	450.362	0.00195572
6.2535e-13	1.28639e-12	1.06185e-14	9.85747e-16	2.44309e-17	7.87833e-13	3.44882e-14	7.49541e-14	3.34341e-10	2.16732e-11	1.44216e-12	3.78577e-09	5.81578e-13	3.09551e-08	1.79304e-16	6.47012e-15	7.61377e-13	7.895e-13	1.48453e-10	8.45337e-08	1.96964e-13	2.90261e-12	4.52437e-11	4.33996e-13	1.19224e-14	4.32142e-10	7.05027e-13	2.84007e-13	1.55089e-12	9.53713e-09	9.44486e-09	1.23099e-11	4.68921e-12	8.5849e-11	1921.67	0.000235446	0.000430788	0.000424853	4.69669e-05	0.000500702	0.0797104	1.55461	0.00338993	0.0723357	0.700818	6.63363e-06	0.00566852	0.015532	416.501	0.00164182
6.2535e-13	1.28639e-12	1.06185e-14	9.85747e-16	2.44309e-17	7.87833e-13	3.44882e-14	7.49541e-14	3.34341e-10	2.16732e-11	1.44216e-12	3.78577e-09	5.81578e-13	3.09551e-08	1.79304e-16	6.47012e-15	7.61377e-13	7.895e-13	1.48453e-10	8.45337e-08	1.96964e-13	2.90261e-12	4.52437e-11	4.33996e-13	1.19224e-14	4.32142e-10	7.05027e-13	2.84007e-13	1.55089e-12	9.53713e-09	9.44486e-09	1.23099e-11	4.68921e-12	8.5849e-11	1921.67	0.000235446	0.000430788	0.000424853	4.69669e-05	0.000500702	0.0797104	1.55461	0.00338993	0.0723357	0.700818	6.63363e-06	0.00566852	0.015532	416.501	0.00164182
6.2535e-13	1.28639e-12	1.06185e-14	9.85747e-16	2.44309e-17	7.87833e-13	3.44882e-14	7.49541e-14	3.34341e-10	2.16732e-11	1.44216e-12	3.78577e-09	5.81578e-13	3.09551e-08	1.79304e-16	6.47012e-15	7.61377e-13	7.895e-13	1.48453e-10	8.45337e-08	1.96964e-13	2.90261e-12	4.52437e-11	4.33996e-13	1.19224e-14	4.32142e-10	7.05027e-13	2.84007e-13	1.55089e-12	9.53713e-09	9.44486e-09	1.23099e-11	4.68921e-12	8.5849e-11	1921.67	0.000235446	0.000430788	0.000424853	4.69669e-05	0.000500702	0.0797104	1.55461	0.00338993	0.0723357	0.700818	6.63363e-06	0.00566852	0.015532	416.501	0.00164182
6.2535e-13	1.28639e-12	1.06185e-14	9.85747e-16	2.44309e-17	7.87833e-13	3.44882e-14	7.49541e-14	3.34341e-10	2.16732e-11	1.44216e-12	3.78577e-09	5.81578e-13	3.09551e-08	1.79304e-16	6.47012e-15	7.61377e-13	7.895e-13	1.48453e-10	8.45337e-08	1.96964e-13	2.90261e-12	4.52437e-11	4.33996e-13	1.19224e-14	4.32142e-10	7.05027e-13	2.84007e-13	1.55089e-12	9.53713e-09	9.44486e-09	1.23099e-11	4.68921e-12	8.5849e-11	1921.67	0.000235446	0.000430788	0.000424853	4.69669e-05	0.000500702	0.0797104	1.55461	0.00338993	0.0723357	0.700818	6.63363e-06	0.00566852	0.015532	416.501	0.00164182
6.2535e-13	1.28639e-12	1.06185e-14	9.85747e-16	2.44309e-17	7.87833e-13	3.44882e-14	7.49541e-14	3.34341e-10	2.16732e-11	1.44216e-12	3.78577e-09	5.81578e-13	3.09551e-08	1.79304e-16	6.47012e-15	7.61377e-13	7.895e-13	1.48453e-10	8.45337e-08	1.96964e-13	2.90261e-12	4.52437e-11	4.33996e-13	1.19224e-14	4.32142e-10	7.05027e-13	2.84007e-13	1.55089e-12	9.53713e-09	9.44486e-09	1.23099e-11	4.68921e-12	8.5849e-11	1921.67	0.000235446	0.000430788	0.000424853	4.69669e-05	0.000500702	0.0797104	1.55461	0.00338993	0.0723357	0.700818	6.63363e-06	0.00566852	0.015532	416.501	0.00164182
6.2535e-13	1.28639e-12	1.06185e-14	9.85747e-16	2.44309e-17	7.87833e-13	3.44882e-14	7.49541e-14	3.34341e-10	2.16732e-11	1.44216e-12	3.78577e-09	5.81578e-13	3.09551e-08	1.79304e-16	6.47012e-15	7.61377e-13	7.895e-13	1.48453e-10	8.45337e-08	1.96964e-13	2.90261e-12	4.52437e-11	4.33996e-13	1.19224e-14	4.32142e-10	7.05027e-13	2.84007e-13	1.55089e-12	9.53713e-09	9.44486e-09	1.23099e-11	4.68921e-12	8.5849e-11	1921.67	0.000235446	0.000430788	0.000424853	4.69669e-05	0.000500702	0.0797104	1.55461	0.00338993	0.0723357	0.700818	6.63363e-06	0.00566852	0.015532	416.501	0.00164182
6.2535e-13	1.28639e-12	1.06185e-14	9.85747e-16	2.44309e-17	7.87833e-13	3.44882e-14	7.49541e-14	3.34341e-10	2.16732e-11	1.44216e-12	3.78577e-09	5.81578e-13	3.09551e-08	1.79304e-16	6.47012e-15	7.61377e-13	7.895e-13	1.48453e-10	8.45337e-08	1.96964e-13	2.90261e-12	4.52437e-11	4.33996e-13	1.19224e-14	4.32142e-10	7.05027e-13	2.84007e-13	1.55089e-12	9.53713e-09	9.44486e-09	1.23099e-11	4.68921e-12	8.5849e-11	1921.67	0.000235446	0.000430788	0.000424853	4.69669e-05	0.000500702	0.0797104	1.55461	0.00338993	0.0723357	0.700818	6.63363e-06	0.00566852	0.015532	416.501	0.00164182
6.2535e-13	1.28639e-12	1.06185e-14	9.85747e-16	2.44309e-17	7.87833e-13	3.44882e-14	7.49541e-14	3.34341e-10	2.16732e-11	1.44216e-12	3.78577e-09	5.81578e-13	3.09551e-08	1.79304e-16	6.47012e-15	7.61377e-13	7.895e-13	1.48453e-10	8.45337e-08	1.96964e-13	2.90261e-12	4.52437e-11	4.33996e-13	1.19224e-14	4.32142e-10	7.05027e-13	2.84007e-13	1.55089e-12	9.53713e-09	9.44486e-09	1.23099e-11	4.68921e-12	8.5849e-11	1921.67	0.000235446	0.000430788	0.000424853	4.69669e-05	0.000500702	0.0797104	1.55461	0.00338993	0.0723357	0.700818	6.63363e-06	0.00566852	0.015532	416.501	0.00164182
6.2535e-13	1.28639e-12	1.06185e-14	9.85747e-16	2.44309e-17	7.87833e-13	3.44882e-14	7.49541e-14	3.34341e-10	2.16732e-11	1.44216e-12	3.78577e-09	5.81578e-13	3.09551e-08	1.79304e-16	6.47012e-15	7.61377e-13	7.895e-13	1.48453e-10	8.45337e-08	1.96964e-13	2.90261e-12	4.52437e-11	4.33996e-13	1.19224e-14	4.32142e-10	7.05027e-13	2.84007e-13	1.55089e-12	9.53713e-09	9.44486e-09	1.23099e-11	4.68921e-12	8.5849e-11	1921.67	0.000235446	0.000430788	0.000424853	4.69669e-05	0.000500702	0.0797104	1.55461	0.00338993	0.0723357	0.700818	6.63363e-06	0.00566852	0.015532	416.501	0.00164182
6.2535e-13	1.28639e-12	1.06185e-14	9.85747e-16	2.44309e-17	7.87833e-13	3.44882e-14	7.49541e-14	3.34341e-10	2.16732e-11	1.44216e-12	3.78577e-09	5.81578e-13	3.09551e-08	1.79304e-16	6.47012e-15	7.61377e-13	7.895e-13	1.48453e-10	8.45337e-08	1.96964e-13	2.90261e-12	4.52437e-11	4.33996e-13	1.19224e-14	4.32142e-10	7.05027e-13	2.84007e-13	1.55089e-12	9.53713e-09	9.44486e-09	1.23099e-11	4.68921e-12	8.5849e-11	1921.67	0.000235446	0.000430788	0.000424853	4.69669e-05	0.000500702	0.0797104	1.55461	0.00338993	0.0723357	0.700818	6.63363e-06	0.00566852	0.015532	416.501	0.00164182
6.2535e-13	1.28639e-12	1.06185e-14	9.85747e-16	2.44309e-17	7.87833e-13	3.44882e-14	7.49541e-14	3.34341e-10	2.16732e-11	1.44216e-12	3.78577e-09	5.81578e-13	3.09551e-08	1.79304e-16	6.47012e-15	7.61377e-13	7.895e-13	1.48453e-10	8.45337e-08	1.96964e-13	2.90261e-12	4.52437e-11	4.33996e-13	1.19224e-14	4.32142e-10	7.05027e-13	2.84007e-13	1.55089e-12	9.53713e-09	9.44486e-09	1.23099e-11	4.68921e-12	8.5849e-11	1921.67	0.000235446	0.000430788	0.000424853	4.69669e-05	0.000500702	0.0797104	1.55461	0.00338993	0.0723357	0.700818	6.63363e-06	0.00566852	0.015532	416.501	0.00164182
6.25454e-13	1.28835e-12	1.40199e-14	1.16651e-15	4.0991e-17	7.67992e-13	3.64687e-14	7.57714e-14	2.57531e-10	2.18668e-11	1.38255e-12	5.26232e-09	5.33423e-13	3.57506e-08	1.59381e-16	4.90599e-15	1.01738e-12	8.05375e-13	2.50117e-10	6.10041e-08	2.22636e-13	3.37551e-12	4.66388e-11	3.54129e-13	1.16316e-14	4.48039e-10	7.06641e-13	2.39181e-13	9.31587e-13	5.69201e-09	9.30495e-09	1.36511e-11	6.58992e-12	8.24685e-11	1993.24	0.000234912	0.000446393	0.000672483	6.66222e-05	0.000418953	0.0756812	1.45905	0.00412161	0.0773762	0.52219	9.98847e-06	0.00528377	0.00930404	180.166	0.00181073
6.2535e-13	1.28639e-12	1.06185e-14	9.85747e-16	2.44309e-17	7.87833e-13	3.44882e-14	7.49541e-14	3.34341e-10	2.16732e-11	1.44216e-12	3.78577e-09	5.81578e-13	3.09551e-08	1.79304e-16	6.47012e-15	7.61377e-13	7.895e-13	1.48453e-10	8.45337e-08	1.96964e-13	2.90261e-12	4.52437e-11	4.33996e-13	1.19224e-14	4.32142e-10	7.05027e-13	2.84007e-13	1.55089e-12	9.53713e-09	9.44486e-09	1.23099e-11	4.68921e-12	8.5849e-11	1921.67	0.000235446	0.000430788	0.000424853	4.69669e-05	0.000500702	0.0797104	1.55461	0.00338993	0.0723357	0.700818	6.63363e-06	0.00566852	0.015532	416.501	0.00164182
6.2535e-13	1.28639e-12	1.06185e-14	9.85747e-16	2.44309e-17	7.87833e-13	3.44882e-14	7.49541e-14	3.34341e-10	2.16732e-11	1.44216e-12	3.78577e-09	5.81578e-13	3.09551e-08	1.79304e-16	6.47012e-15	7.61377e-13	7.895e-13	1.48453e-10	8.45337e-08	1.96964e-13	2.90261e-12	4.52437e-11	4.33996e-13	1.19224e-14	4.32142e-10	7.05027e-13	2.84007e-13	1.55089e-12	9.53713e-09	9.44486e-09	1.23099e-11	4.68921e-12	8.5849e-11	1921.67	0.000235446	0.000430788	0.000424853	4.69669e-05	0.000500702	0.0797104	1.55461	0.00338993	0.0723357	0.700818	6.63363e-06	0.00566852	0.015532	416.501	0.00164182
6.2535e-13	1.28639e-12	1.06185e-14	9.85747e-16	2.44309e-17	7.87833e-13	3.44882e-14	7.49541e-14	3.34341e-10	2.16732e-11	1.44216e-12	3.78577e-09	5.81578e-13	3.09551e-08	1.79304e-16	6.47012e-15	7.61377e-13	7.895e-13	1.48453e-10	8.45337e-08	1.96964e-13	2.90261e-12	4.52437e-11	4.33996e-13	1.19224e-14	4.32142e-10	7.05027e-13	2.84007e-13	1.55089e-12	9.53713e-09	9.44486e-09	1.23099e-11	4.68921e-12	8.5849e-11	1921.67	0.000235446	0.000430788	0.000424853	4.69669e-05	0.000500702	0.0797104	1.55461	0.00338993	0.0723357	0.700818	6.63363e-06	0.00566852	0.015532	416.501	0.00164182
6.2535e-13	1.28639e-12	1.06185e-14	9.85747e-16	2.44309e-17	7.87833e-13	3.44882e-14	7.49541e-14	3.34341e-10	2.16732e-11	1.44216e-12	3.78577e-09	5.81578e-13	3.09551e-08	1.79304e-16	6.47012e-15	7.61377e-13	7.895e-13	1.48453e-10	8.45337e-08	1.96964e-13	2.90261e-12	4.52437e-11	4.33996e-13	1.19224e-14	4.32142e-10	7.05027e-13	2.84007e-13	1.55089e-12	9.53713e-09	9.44486e-09	1.23099e-11	4.68921e-12	8.5849e-11	1921.67	0.000235446	0.000430788	0.000424853	4.69669e-05	0.000500702	0.0797104	1.55461	0.00338993	0.0723357	0.700818	6.63363e-06	0.00566852	0.015532	416.501	0.00164182
6.2535e-13	1.28639e-12	1.06185e-14	9.85747e-16	2.44309e-17	7.87833e-13	3.44882e-14	7.49541e-14	3.34341e-10	2.16732e-11	1.44216e-12	3.78577e-09	5.81578e-13	3.09551e-08	1.79304e-16	6.47012e-15	7.61377e-13	7.895e-13	1.48453e-10	8.45337e-08	1.96964e-13	2.90261e-12	4.52437e-11	4.33996e-13	1.19224e-14	4.32142e-10	7.05027e-13	2.84007e-13	1.55089e-12	9.53713e-09	9.44486e-09	1.23099e-11	4.68921e-12	8.5849e-11	1921.67	0.000235446	0.000430788	0.000424853	4.69669e-05	0.000500702	0.0797104	1.55461	0.00338993	0.0723357	0.700818	6.63363e-06	0.00566852	0.015532	416.501	0.00164182
6.2535e-13	1.28639e-12	1.06185e-14	9.85747e-16	2.44309e-17	7.87833e-13	3.44882e-14	7.49541e-14	3.34341e-10	2.16732e-11	1.44216e-12	3.78577e-09	5.81578e-13	3.09551e-08	1.79304e-16	6.47012e-15	7.61377e-13	7.895e-13	1.48453e-10	8.45337e-08	1.96964e-13	2.90261e-12	4.52437e-11	4.33996e-13	1.19224e-14	4.32142e-10	7.05027e-13	2.84007e-13	1.55089e-12	9.53713e-09	9.44486e-09	1.23099e-11	4.68921e-12	8.5849e-11	1921.67	0.000235446	0.000430788	0.000424853	4.69669e-05	0.000500702	0.0797104	1.55461	0.00338993	0.0723357	0.700818	6.63363e-06	0.00566852	0.015532	416.501	0.00164182
6.2535e-13	1.28639e-12	1.06185e-14	9.85747e-16	2.44309e-17	7.87833e-13	3.44882e-14	7.49541e-14	3.34341e-10	2.16732e-11	1.44216e-12	3.78577e-09	5.81578e-13	3.09551e-08	1.79304e-16	6.47012e-15	7.61377e-13	7.895e-13	1.48453e-10	8.45337e-08	1.96964e-13	2.90261e-12	4.52437e-11	4.33996e-13	1.19224e-14	4.32142e-10	7.05027e-13	2.84007e-13	1.55089e-12	9.53713e-09	9.44486e-09	1.23099e-11	4.68921e-12	8.5849e-11	1921.67	0.000235446	0.000430788	0.000424853	4.69669e-05	0.000500702	0.0797104	1.55461	0.00338993	0.0723357	0.700818	6.63363e-06	0.00566852	0.015532	416.501	0.00164182
6.2535e-13	1.28639e-12	1.06185e-14	9.85747e-16	2.44309e-17	7.87833e-13	3.44882e-14	7.49541e-14	3.34341e-10	2.16732e-11	1.44216e-12	3.78577e-09	5.81578e-13	3.09551e-08	1.79304e-16	6.47012e-15	7.61377e-13	7.895e-13	1.48453e-10	8.45337e-08	1.96964e-13	2.90261e-12	4.52437e-11	4.33996e-13	1.19224e-14	4.32142e-10	7.05027e-13	2.84007e-13	1.55089e-12	9.53713e-09	9.44486e-09	1.23099e-11	4.68921e-12	8.5849e-11	1921.67	0.000235446	0.000430788	0.000424853	4.69669e-05	0.000500702	0.0797104	1.55461	0.00338993	0.0723357	0.700818	6.63363e-06	0.00566852	0.015532	416.501	0.00164182
6.2535e-13	1.28639e-12	1.06185e-14	9.85747e-16	2.44309e-17	7.87833e-13	3.44882e-14	7.49541e-14	3.34341e-10	2.16732e-11	1.44216e-12	3.78577e-09	5.81578e-13	3.09551e-08	1.79304e-16	6.47012e-15	7.61377e-13	7.895e-13	1.48453e-10	8.45337e-08	1.96964e-13	2.90261e-12	4.52437e-11	4.33996e-13	1.19224e-14	4.32142e-10	7.05027e-13	2.84007e-13	1.55089e-12	9.53713e-09	9.44486e-09	1.23099e-11	4.68921e-12	8.5849e-11	1921.67	0.000235446	0.000430788	0.000424853	4.69669e-05	0.000500702	0.0797104	1.55461	0.00338993	0.0723357	0.700818	6.63363e-06	0.00566852	0.015532	416.501	0.00164182
6.2535e-13	1.28639e-12	1.06185e-14	9.85747e-16	2.44309e-17	7.87833e-13	3.44882e-14	7.49541e-14	3.34341e-10	2.16732e-11	1.44216e-12	3.78577e-09	5.81578e-13	3.09551e-08	1.79304e-16	6.47012e-15	7.61377e-13	7.895e-13	1.48453e-10	8.45337e-08	1.96964e-13	2.90261e-12	4.52437e-11	4.33996e-13	1.19224e-14	4.32142e-10	7.05027e-13	2.84007e-13	1.55089e-12	9.53713e-09	9.44486e-09	1.23099e-11	4.68921e-12	8.5849e-11	1921.67	0.000235446	0.000430788	0.000424853	4.69669e-05	0.000500702	0.0797104	1.55461	0.00338993	0.0723357	0.700818	6.63363e-06	0.00566852	0.015532	416.501	0.00164182
6.2535e-13	1.28639e-12	1.06185e-14	9.85747e-16	2.44309e-17	7.87833e-13	3.44882e-14	7.49541e-14	3.34341e-10	2.16732e-11	1.44216e-12	3.78577e-09	5.81578e-13	3.09551e-08	1.79304e-16	6.47012e-15	7.61377e-13	7.895e-13	1.48453e-10	8.45337e-08	1.96964e-13	2.90261e-12	4.52437e-11	4.33996e-13	1.19224e-14	4.32142e-10	7.05027e-13	2.84007e-13	1.55089e-12	9.53713e-09	9.44486e-09	1.23099e-11	4.68921e-12	8.5849e-11	1921.67	0.000235446	0.000430788	0.000424853	4.69669e-05	0.000500702	0.0797104	1.55461	0.00338993	0.0723357	0.700818	6.63363e-06	0.00566852	0.015532	416.501	0.00164182
6.2535e-13	1.28639e-12	1.06185e-14	9.85747e-16	2.44309e-17	7.87833e-13	3.44882e-14	7.49541e-14	3.34341e-10	2.16732e-11	1.44216e-12	3.78577e-09	5.81578e-13	3.09551e-08	1.79304e-16	6.47012e-15	7.61377e-13	7.895e-13	1.48453e-10	8.45337e-08	1.96964e-13	2.90261e-12	4.52437e-11	4.33996e-13	1.19224e-14	4.32142e-10	7.05027e-13	2.84007e-13	1.55089e-12	9.53713e-09	9.44486e-09	1.23099e-11	4.68921e-12	8.5849e-11	1921.67	0.000235446	0.000430788	0.000424853	4.69669e-05	0.000500702	0.0797104	1.55461	0.00338993	0.0723357	0.700818	6.63363e-06	0.00566852	0.015532	416.501	0.00164182
6.2535e-13	1.28639e-12	1.06185e-14	9.85747e-16	2.44309e-17	7.87833e-13	3.44882e-14	7.49541e-14	3.34341e-10	2.16732e-11	1.44216e-12	3.78577e-09	5.81578e-13	3.09551e-08	1.79304e-16	6.47012e-15	7.61377e-13	7.895e-13	1.48453e-10	8.45337e-08	1.96964e-13	2.90261e-12	4.52437e-11	4.33996e-13	1.19224e-14	4.32142e-10	7.05027e-13	2.84007e-13	1.55089e-12	9.53713e-09	9.44486e-09	1.23099e-11	4.68921e-12	8.5849e-11	1921.67	0.000235446	0.000430788	0.000424853	4.69669e-05	0.000500702	0.0797104	1.55461	0.00338993	0.0723357	0.700818	6.63363e-06	0.00566852	0.015532	416.501	0.00164182
6.2535e-13	1.28639e-12	1.06185e-14	9.85747e-16	2.44309e-17	7.87833e-13	3.44882e-14	7.49541e-14	3.34341e-10	2.16732e-11	1.44216e-12	3.78577e-09	5.81578e-13	3.09551e-08	1.79304e-16	6.47012e-15	7.61377e-13	7.895e-13	1.48453e-10	8.45337e-08	1.96964e-13	2.90261e-12	4.52437e-11	4.33996e-13	1.19224e-14	4.32142e-10	7.05027e-13	2.84007e-13	1.55089e-12	9.53713e-09	9.44486e-09	1.23099e-11	4.68921e-12	8.5849e-11	1921.67	0.000235446	0.000430788	0.000424853	4.69669e-05	0.000500702	0.0797104	1.55461	0.00338993	0.0723357	0.700818	6.63363e-06	0.00566852	0.015532	416.501	0.00164182
6.2535e-13	1.28639e-12	1.06185e-14	9.85747e-16	2.44309e-17	7.87833e-13	3.44882e-14	7.49541e-14	3.34341e-10	2.16732e-11	1.44216e-12	3.78577e-09	5.81578e-13	3.09551e-08	1.79304e-16	6.47012e-15	7.61377e-13	7.895e-13	1.48453e-10	8.45337e-08	1.96964e-13	2.90261e-12	4.52437e-11	4.33996e-13	1.19224e-14	4.32142e-10	7.05027e-13	2.84007e-13	1.55089e-12	9.53713e-09	9.44486e-09	1.23099e-11	4.68921e-12	8.5849e-11	1921.67	0.000235446	0.000430788	0.000424853	4.69669e-05	0.000500702	0.0797104	1.55461	0.00338993	0.0723357	0.700818	6.63363e-06	0.00566852	0.015532	416.501	0.00164182
6.2535e-13	1.28639e-12	1.06185e-14	9.85747e-16	2.44309e-17	7.87833e-13	3.44882e-14	7.49541e-14	3.34341e-10	2.16732e-11	1.44216e-12	3.78577e-09	5.81578e-13	3.09551e-08	1.79304e-16	6.47012e-15	7.61377e-13	7.895e-13	1.48453e-10	8.45337e-08	1.96964e-13	2.90261e-12	4.52437e-11	4.33996e-13	1.19224e-14	4.32142e-10	7.05027e-13	2.84007e-13	1.55089e-12	9.53713e-09	9.44486e-09	1.23099e-11	4.68921e-12	8.5849e-11	1921.67	0.000235446	0.000430788	0.000424853	4.69669e-05	0.000500702	0.0797104	1.55461	0.00338993	0.0723357	0.700818	6.63363e-06	0.00566852	0.015532	416.501	0.00164182
6.2535e-13	1.28639e-12	1.06185e-14	9.85747e-16	2.44309e-17	7.87833e-13	3.44882e-14	7.49541e-14	3.34341e-10	2.16732e-11	1.44216e-12	3.78577e-09	5.81578e-13	3.09551e-08	1.79304e-16	6.47012e-15	7.61377e-13	7.895e-13	1.48453e-10	8.45337e-08	1.96964e-13	2.90261e-12	4.52437e-11	4.33996e-13	1.19224e-14	4.32142e-10	7.05027e-13	2.84007e-13	1.55089e-12	9.53713e-09	9.44486e-09	1.23099e-11	4.68921e-12	8.5849e-11	1921.67	0.000235446	0.000430788	0.000424853	4.69669e-05	0.000500702	0.0797104	1.55461	0.00338993	0.0723357	0.700818	6.63363e-06	0.00566852	0.015532	416.501	0.00164182
6.2535e-13	1.28639e-12	1.06185e-14	9.85747e-16	2.44309e-17	7.87833e-13	3.44882e-14	7.49541e-14	3.34341e-10	2.16732e-11	1.44216e-12	3.78577e-09	5.81578e-13	3.09551e-08	1.79304e-16	6.47012e-15	7.61377e-13	7.895e-13	1.48453e-10	8.45337e-08	1.96964e-13	2.90261e-12	4.52437e-11	4.33996e-13	1.19224e-14	4.32142e-10	7.05027e-13	2.84007e-13	1.55089e-12	9.53713e-09	9.44486e-09	1.23099e-11	4.68921e-12	8.5849e-11	1921.67	0.000235446	0.000430788	0.000424853	4.69669e-05	0.000500702	0.0797104	1.55461	0.00338993	0.0723357	0.700818	6.63363e-06	0.00566852	0.015532	416.501	0.00164182
6.2535e-13	1.28639e-12	1.06185e-14	9.85747e-16	2.44309e-17	7.87833e-13	3.44882e-14	7.49541e-14	3.34341e-10	2.16732e-11	1.44216e-12	3.78577e-09	5.81578e-13	3.09551e-08	1.79304e-16	6.47012e-15	7.61377e-13	7.895e-13	1.48453e-10	8.45337e-08	1.96964e-13	2.90261e-12	4.52437e-11	4.33996e-13	1.19224e-14	4.32142e-10	7.05027e-13	2.84007e-13	1.55089e-12	9.53713e-09	9.44486e-09	1.23099e-11	4.68921e-12	8.5849e-11	1921.67	0.000235446	0.000430788	0.000424853	4.69669e-05	0.000500702	0.0797104	1.55461	0.00338993	0.0723357	0.700818	6.63363e-06	0.00566852	0.015532	416.501	0.00164182
6.2535e-13	1.28639e-12	1.06185e-14	9.85747e-16	2.44309e-17	7.87833e-13	3.44882e-14	7.49541e-14	3.34341e-10	2.16732e-11	1.44216e-12	3.78577e-09	5.81578e-13	3.09551e-08	1.79304e-16	6.47012e-15	7.61377e-13	7.895e-13	1.48453e-10	8.45337e-08	1.96964e-13	2.90261e-12	4.52437e-11	4.33996e-13	1.19224e-14	4.32142e-10	7.05027e-13	2.84007e-13	1.55089e-12	9.53713e-09	9.44486e-09	1.23099e-11	4.68921e-12	8.5849e-11	1921.67	0.000235446	0.000430788	0.000424853	4.69669e-05	0.000500702	0.0797104	1.55461	0.00338993	0.0723357	0.700818	6.63363e-06	0.00566852	0.015532	416.501	0.00164182
6.2535e-13	1.28639e-12	1.06185e-14	9.85747e-16	2.44309e-17	7.87833e-13	3.44882e-14	7.49541e-14	3.34341e-10	2.16732e-11	1.44216e-12	3.78577e-09	5.81578e-13	3.09551e-08	1.79304e-16	6.47012e-15	7.61377e-13	7.895e-13	1.48453e-10	8.45337e-08	1.96964e-13	2.90261e-12	4.52437e-11	4.33996e-13	1.19224e-14	4.32142e-10	7.05027e-13	2.84007e-13	1.55089e-12	9.53713e-09	9.44486e-09	1.23099e-11	4.68921e-12	8.5849e-11	1921.67	0.000235446	0.000430788	0.000424853	4.69669e-05	0.000500702	0.0797104	1.55461	0.00338993	0.0723357	0.700818	6.63363e-06	0.00566852	0.015532	416.501	0.00164182
6.2535e-13	1.28639e-12	1.06185e-14	9.85747e-16	2.44309e-17	7.87833e-13	3.44882e-14	7.49541e-14	3.34341e-10	2.16732e-11	1.44216e-12	3.78577e-09	5.81578e-13	3.09551e-08	1.79304e-16	6.47012e-15	7.61377e-13	7.895e-13	1.48453e-10	8.45337e-08	1.96964e-13	2.90261e-12	4.52437e-11	4.33996e-13	1.19224e-14	4.32142e-10	7.05027e-13	2.84007e-13	1.55089e-12	9.53713e-09	9.44486e-09	1.23099e-11	4.68921e-12	8.5849e-11	1921.67	0.000235446	0.000430788	0.000424853	4.69669e-05	0.000500702	0.0797104	1.55461	0.00338993	0.0723357	0.700818	6.63363e-06	0.00566852	0.015532	416.501	0.00164182
6.2535e-13	1.28639e-12	1.06185e-14	9.85747e-16	2.44309e-17	7.87833e-13	3.44882e-14	7.49541e-14	3.34341e-10	2.16732e-11	1.44216e-12	3.78577e-09	5.81578e-13	3.09551e-08	1.79304e-16	6.47012e-15	7.61377e-13	7.895e-13	1.48453e-10	8.45337e-08	1.96964e-13	2.90261e-12	4.52437e-11	4.33996e-13	1.19224e-14	4.32142e-10	7.05027e-13	2.84007e-13	1.55089e-12	9.53713e-09	9.44486e-09	1.23099e-11	4.68921e-12	8.5849e-11	1921.67	0.000235446	0.000430788	0.000424853	4.69669e-05	0.000500702	0.0797104	1.55461	0.00338993	0.0723357	0.700818	6.63363e-06	0.00566852	0.015532	416.501	0.00164182
6.2535e-13	1.28639e-12	1.06185e-14	9.85747e-16	2.44309e-17	7.87833e-13	3.44882e-14	7.49541e-14	3.34341e-10	2.16732e-11	1.44216e-12	3.78577e-09	5.81578e-13	3.09551e-08	1.79304e-16	6.47012e-15	7.61377e-13	7.895e-13	1.48453e-10	8.45337e-08	1.96964e-13	2.90261e-12	4.52437e-11	4.33996e-13	1.19224e-14	4.32142e-10	7.05027e-13	2.84007e-13	1.55089e-12	9.53713e-09	9.44486e-09	1.23099e-11	4.68921e-12	8.5849e-11	1921.67	0.000235446	0.000430788	0.000424853	4.69669e-05	0.000500702	0.0797104	1.55461	0.00338993	0.0723357	0.700818	6.63363e-06	0.00566852	0.015532	416.501	0.00164182
6.2535e-13	1.28639e-12	1.06185e-14	9.85747e-16	2.44309e-17	7.87833e-13	3.44882e-14	7.49541e-14	3.34341e-10	2.16732e-11	1.44216e-12	3.78577e-09	5.81578e-13	3.09551e-08	1.79304e-16	6.47012e-15	7.61377e-13	7.895e-13	1.48453e-10	8.45337e-08	1.96964e-13	2.90261e-12	4.52437e-11	4.33996e-13	1.19224e-14	4.32142e-10	7.05027e-13	2.84007e-13	1.55089e-12	9.53713e-09	9.44486e-09	1.23099e-11	4.68921e-12	8.5849e-11	1921.67	0.000235446	0.000430788	0.000424853	4.69669e-05	0.000500702	0.0797104	1.55461	0.00338993	0.0723357	0.700818	6.63363e-06	0.00566852	0.015532	416.501	0.00164182
6.2535e-13	1.28639e-12	1.06185e-14	9.85747e-16	2.44309e-17	7.87833e-13	3.44882e-14	7.49541e-14	3.34341e-10	2.16732e-11	1.44216e-12	3.78577e-09	5.81578e-13	3.09551e-08	1.79304e-16	6.47012e-15	7.61377e-13	7.895e-13	1.48453e-10	8.45337e-08	1.96964e-13	2.90261e-12	4.52437e-11	4.33996e-13	1.19224e-14	4.32142e-10	7.05027e-13	2.84007e-13	1.55089e-12	9.53713e-09	9.44486e-09	1.23099e-11	4.68921e-12	8.5849e-11	1921.67	0.000235446	0.000430788	0.000424853	4.69669e-05	0.000500702	0.0797104	1.55461	0.00338993	0.0723357	0.700818	6.63363e-06	0.00566852	0.015532	416.501	0.00164182
6.2535e-13	1.28639e-12	1.06185e-14	9.85747e-16	2.44309e-17	7.87833e-13	3.44882e-14	7.49541e-14	3.34341e-10	2.16732e-11	1.44216e-12	3.78577e-09	5.81578e-13	3.09551e-08	1.79304e-16	6.47012e-15	7.61377e-13	7.895e-13	1.48453e-10	8.45337e-08	1.96964e-13	2.90261e-12	4.52437e-11	4.33996e-13	1.19224e-14	4.32142e-10	7.05027e-13	2.84007e-13	1.55089e-12	9.53713e-09	9.44486e-09	1.23099e-11	4.68921e-12	8.5849e-11	1921.67	0.000235446	0.000430788	0.000424853	4.69669e-05	0.000500702	0.0797104	1.55461	0.00338993	0.0723357	0.700818	6.63363e-06	0.00566852	0.015532	416.501	0.00164182
6.2535e-13	1.28639e-12	1.06185e-14	9.85747e-16	2.44309e-17	7.87833e-13	3.44882e-14	7.49541e-14	3.34341e-10	2.16732e-11	1.44216e-12	3.78577e-09	5.81578e-13	3.09551e-08	1.79304e-16	6.47012e-15	7.61377e-13	7.895e-13	1.48453e-10	8.45337e-08	1.96964e-13	2.90261e-12	4.52437e-11	4.33996e-13	1.19224e-14	4.32142e-10	7.05027e-13	2.84007e-13	1.55089e-12	9.53713e-09	9.44486e-09	1.23099e-11	4.68921e-12	8.5849e-11	1921.67	0.000235446	0.000430788	0.000424853	4.69669e-05	0.000500702	0.0797104	1.55461	0.00338993	0.0723357	0.700818	6.63363e-06	0.00566852	0.015532	416.501	0.00164182
6.2535e-13	1.28639e-12	1.06185e-14	9.85747e-16	2.44309e-17	7.87833e-13	3.44882e-14	7.49541e-14	3.34341e-10	2.16732e-11	1.44216e-12	3.78577e-09	5.81578e-13	3.09551e-08	1.79304e-16	6.47012e-15	7.61377e-13	7.895e-13	1.48453e-10	8.45337e-08	1.96964e-13	2.90261e-12	4.52437e-11	4.33996e-13	1.19224e-14	4.32142e-10	7.05027e-13	2.84007e-13	1.55089e-12	9.53713e-09	9.44486e-09	1.23099e-11	4.68921e-12	8.5849e-11	1921.67	0.000235446	0.000430788	0.000424853	4.69669e-05	0.000500702	0.0797104	1.55461	0.00338993	0.0723357	0.700818	6.63363e-06	0.00566852	0.015532	416.501	0.00164182
6.2535e-13	1.28639e-12	1.06185e-14	9.85747e-16	2.44309e-17	7.87833e-13	3.44882e-14	7.49541e-14	3.34341e-10	2.16732e-11	1.44216e-12	3.78577e-09	5.81578e-13	3.09551e-08	1.79304e-16	6.47012e-15	7.61377e-13	7.895e-13	1.48453e-10	8.45337e-08	1.96964e-13	2.90261e-12	4.52437e-11	4.33996e-13	1.19224e-14	4.32142e-10	7.05027e-13	2.84007e-13	1.55089e-12	9.53713e-09	9.44486e-09	1.23099e-11	4.68921e-12	8.5849e-11	1921.67	0.000235446	0.000430788	0.000424853	4.69669e-05	0.000500702	0.0797104	1.55461	0.00338993	0.0723357	0.700818	6.63363e-06	0.00566852	0.015532	416.501	0.00164182
6.25364e-13	2.8573e-12	1.088e-14	1.12396e-15	2.1915e-17	7.73584e-13	4.124e-14	8.29077e-14	3.03139e-10	2.68914e-11	1.40941e-12	4.49091e-09	5.49356e-13	2.46788e-08	1.63612e-16	5.68879e-15	7.53028e-13	7.6209e-13	1.57781e-10	9.45969e-08	2.07669e-13	3.07869e-12	4.4283e-11	4.3167e-13	1.21451e-14	5.69091e-10	6.93794e-13	2.7447e-13	1.49723e-12	1.15461e-08	1.11338e-08	7.74653e-12	4.42034e-12	7.09156e-11	1891.69	0.000220331	0.00043421	0.000452568	4.60057e-05	0.000204603	0.20632	0.747548	0.0045217	0.0656736	0.656254	5.63196e-06	0.00618116	0.0167967	426.475	0.00165754
6.25236e-13	1.38271e-12	1.42428e-14	9.68331e-16	1.07971e-17	8.04783e-13	3.8083e-14	5.9677e-14	3.49336e-10	2.29634e-11	1.39166e-12	3.3715e-09	5.91502e-13	2.72747e-08	1.89913e-16	5.62952e-15	7.86537e-13	7.69637e-13	1.61943e-10	8.65366e-08	1.73143e-13	3.32986e-12	4.75029e-11	4.446e-13	1.16886e-14	4.44497e-10	7.06549e-13	2.3983e-13	1.45587e-12	1.01934e-08	9.34632e-09	1.40716e-11	4.7148e-12	9.19963e-11	1870.17	0.000229454	0.000438824	0.000449485	5.24715e-05	0.000593919	0.0782319	1.27384	0.00391976	0.0710329	0.449818	5.64668e-06	0.00577445	0.0171995	434.702	0.00160649
6.25557e-13	1.20241e-12	1.16196e-14	9.8208e-16	2.21771e-17	8.13348e-13	3.91316e-14	6.88247e-14	3.36455e-10	2.41378e-11	1.40381e-12	3.49754e-09	5.90145e-13	3.07511e-08	1.75766e-16	6.02241e-15	8.26814e-13	7.80393e-13	1.40013e-10	8.1847e-08	2.00376e-13	2.74113e-12	4.54661e-11	4.38292e-13	1.08705e-14	3.9719e-10	6.9681e-13	2.49047e-13	1.49558e-12	9.36913e-09	1.01583e-08	1.29973e-11	4.31653e-12	9.0081e-11	1982.16	0.000223382	0.000435195	0.000458024	4.72885e-05	0.000510759	0.0711205	1.68281	0.0030749	0.0677922	0.727341	7.12591e-06	0.0061344	0.0157183	394.865	0.00143061
6.22952e-13	1.19552e-12	1.07059e-14	8.94067e-16	3.27786e-17	8.15876e-13	4.41776e-14	7.33166e-14	3.10131e-10	2.15481e-11	1.35018e-12	4.82993e-09	5.57964e-13	3.61452e-08	2.03814e-16	5.70198e-15	7.48004e-13	7.48716e-13	1.45442e-10	7.97495e-08	2.24981e-13	3.24247e-12	5.22482e-11	4.37597e-13	1.13548e-14	4.30506e-10	7.563e-13	2.2465e-13	1.52766e-12	7.73787e-09	9.2029e-09	1.40214e-11	4.7544e-12	8.96952e-11	1864.94	0.000216693	0.000445885	0.0004308	6.00525e-05	0.00325882	0.0573496	1.44741	0.0034685	0.0700076	0.68235	7.38617e-06	0.00706433	0.0135183	400.306	0.0012439
6.25068e-13	4.98704e-12	1.07196e-14	1.19955e-15	2.42045e-17	7.78928e-13	5.1986e-14	6.85369e-14	3.31117e-10	2.16376e-11	1.40359e-12	4.35939e-09	6.57105e-13	3.20425e-08	1.95903e-16	6.28609e-15	9.66659e-13	8.14278e-13	1.32685e-10	9.42054e-08	2.33502e-13	3.18905e-12	4.68392e-11	4.38711e-13	1.23137e-14	3.49384e-10	6.75841e-13	2.67097e-13	1.4839e-12	1.08513e-08	9.33515e-09	1.31374e-11	4.96504e-12	8.93904e-11	1929.42	0.000235842	0.000419096	0.000426114	4.46278e-05	0.000402076	0.324946	0.563062	0.00377772	0.0730722	0.690597	6.47221e-06	0.00594609	0.0153689	402.766	0.0014152
6.21295e-13	1.21045e-12	1.15877e-14	8.16284e-16	1.96782e-17	7.49009e-13	4.18873e-14	5.75364e-14	3.20722e-10	2.43452e-11	1.40488e-12	3.60157e-09	6.73546e-13	2.75647e-08	1.83778e-16	8.00806e-15	8.52821e-13	8.21899e-13	1.32697e-10	8.49312e-08	1.71204e-13	2.59835e-12	4.36274e-11	4.41695e-13	1.02103e-14	4.03309e-10	7.17304e-13	2.76343e-13	1.50045e-12	9.60029e-09	1.00857e-08	1.51959e-11	4.55933e-12	1.2322e-10	1976.58	0.000227029	0.000433024	0.000433981	3.85317e-05	0.000465177	0.0672592	1.57234	0.00589582	0.0590922	0.361625	7.00458e-06	0.00573746	0.0158751	399.368	0.00125628
6.2535e-13	1.28639e-12	1.06185e-14	9.85747e-16	2.44309e-17	7.87833e-13	3.44882e-14	7.49541e-14	3.34341e-10	2.16732e-11	1.44216e-12	3.78577e-09	5.81578e-13	3.09551e-08	1.79304e-16	6.47012e-15	7.61377e-13	7.895e-13	1.48453e-10	8.45337e-08	1.96964e-13	2.90261e-12	4.52437e-11	4.33996e-13	1.19224e-14	4.32142e-10	7.05027e-13	2.84007e-13	1.55089e-12	9.53713e-09	9.44486e-09	1.23099e-11	4.68921e-12	8.5849e-11	1921.67	0.000235446	0.000430788	0.000424853	4.69669e-05	0.000500702	0.0797104	1.55461	0.00338993	0.0723357	0.700818	6.63363e-06	0.00566852	0.015532	416.501	0.00164182
6.25876e-13	1.27923e-12	1.39023e-14	1.09379e-15	2.30999e-17	7.95741e-13	3.56182e-14	7.32774e-14	4.2605e-10	2.0625e-11	1.36167e-12	3.73777e-09	5.00451e-13	2.83332e-08	1.89251e-16	5.32309e-15	7.0487e-13	7.97137e-13	1.72771e-10	6.96443e-08	2.21159e-13	2.62183e-12	5.49426e-11	4.42161e-13	1.0394e-14	4.19688e-10	7.36712e-13	2.10127e-13	1.56529e-12	7.47386e-09	1.20939e-08	1.43772e-11	4.24766e-12	1.52293e-10	1717.45	0.000225102	0.000431731	0.000387271	4.65131e-05	0.000533308	0.0716297	1.42241	0.00692082	0.108269	0.693409	6.13418e-06	0.00535697	0.0195939	325.518	0.00159357
6.2535e-13	1.28639e-12	1.06185e-14	9.85747e-16	2.44309e-17	7.87833e-13	3.44882e-14	7.49541e-14	3.34341e-10	2.16732e-11	1.44216e-12	3.78577e-09	5.81578e-13	3.09551e-08	1.79304e-16	6.47012e-15	7.61377e-13	7.895e-13	1.48453e-10	8.45337e-08	1.96964e-13	2.90261e-12	4.52437e-11	4.33996e-13	1.19224e-14	4.32142e-10	7.05027e-13	2.84007e-13	1.55089e-12	9.53713e-09	9.44486e-09	1.23099e-11	4.68921e-12	8.5849e-11	1921.67	0.000235446	0.000430788	0.000424853	4.69669e-05	0.000500702	0.0797104	1.55461	0.00338993	0.0723357	0.700818	6.63363e-06	0.00566852	0.015532	416.501	0.00164182
6.2535e-13	1.28639e-12	1.06185e-14	9.85747e-16	2.44309e-17	7.87833e-13	3.44882e-14	7.49541e-14	3.34341e-10	2.16732e-11	1.44216e-12	3.78577e-09	5.81578e-13	3.09551e-08	1.79304e-16	6.47012e-15	7.61377e-13	7.895e-13	1.48453e-10	8.45337e-08	1.96964e-13	2.90261e-12	4.52437e-11	4.33996e-13	1.19224e-14	4.32142e-10	7.05027e-13	2.84007e-13	1.55089e-12	9.53713e-09	9.44486e-09	1.23099e-11	4.68921e-12	8.5849e-11	1921.67	0.000235446	0.000430788	0.000424853	4.69669e-05	0.000500702	0.0797104	1.55461	0.00338993	0.0723357	0.700818	6.63363e-06	0.00566852	0.015532	416.501	0.00164182
6.2587e-13	1.3358e-12	1.21538e-14	9.14254e-16	2.5472e-17	7.47798e-13	2.90525e-14	7.52234e-14	2.7583e-10	1.93607e-11	1.43397e-12	4.10439e-09	7.1804e-13	2.67759e-08	1.71412e-16	7.18483e-15	7.3758e-13	7.84913e-13	1.57444e-10	9.36815e-08	2.33329e-13	3.15715e-12	4.12205e-11	4.52832e-13	1.06335e-14	4.71238e-10	6.95836e-13	2.88866e-13	1.5337e-12	8.55024e-09	9.88516e-09	1.12985e-11	5.09266e-12	7.43418e-11	1784.78	0.000222233	0.000442886	0.000433191	4.62826e-05	0.000363654	0.077588	1.42791	0.00320172	0.0814343	0.623506	6.16434e-06	0.00587449	0.0198679	305.955	0.00144861
6.25509e-13	1.15601e-12	1.23895e-14	9.17508e-16	2.44386e-17	8.01553e-13	2.7798e-14	9.54517e-14	3.65438e-10	1.92071e-11	1.33714e-12	3.53e-09	5.83824e-13	3.0872e-08	1.69003e-16	6.49602e-15	6.3749e-13	8.26345e-13	1.42685e-10	7.98081e-08	1.45492e-13	3.60264e-12	4.13206e-11	4.29713e-13	1.15191e-14	4.07895e-10	7.57323e-13	2.15821e-13	1.35205e-12	1.22904e-08	1.01668e-08	9.6033e-12	4.53492e-12	7.65811e-11	1991.8	0.000224244	0.000434515	0.000386735	4.87758e-05	0.000444923	0.0660764	1.75694	0.00311777	0.0496574	0.5916	7.13142e-06	0.00596217	0.0197319	555.317	0.00152982
6.25885e-13	1.19256e-12	1.12159e-14	9.36586e-16	3.0879e-17	7.69468e-13	3.06859e-14	6.48714e-14	3.60294e-10	1.67848e-11	1.43818e-12	4.00024e-09	5.88397e-13	2.82921e-08	1.63778e-16	6.07767e-15	7.37491e-13	7.27348e-13	1.28003e-10	9.35041e-08	2.17131e-13	2.60433e-12	4.12078e-11	3.95822e-13	1.21208e-14	4.66022e-10	6.63696e-13	2.75021e-13	1.46687e-12	7.71449e-09	9.29694e-09	1.00242e-11	4.37102e-12	9.20269e-11	1843.41	0.000241223	0.000441538	0.000433116	4.9977e-05	0.000398039	0.0697542	1.64293	0.00303299	0.0706192	0.635711	7.05939e-06	0.00532537	0.0169184	406.665	0.00142039
6.25521e-13	1.4733e-12	1.06804e-14	1.05185e-15	2.34681e-17	7.70322e-13	3.64323e-14	6.81155e-14	3.72634e-10	2.52822e-11	1.39839e-12	4.51878e-09	5.04374e-13	2.75459e-08	1.8445e-16	6.30186e-15	7.62618e-13	8.27827e-13	1.57046e-10	8.1259e-08	2.33951e-13	2.74388e-12	4.53763e-11	4.47627e-13	1.04475e-14	4.56951e-10	7.19909e-13	2.28403e-13	1.36986e-12	1.01302e-08	1.03154e-08	1.13602e-11	4.56328e-12	9.48227e-11	2111.59	0.00023457	0.000444326	0.000458294	5.29112e-05	0.000567786	0.114504	1.57683	0.00379363	0.0745722	0.711974	5.80207e-06	0.00644832	0.0162122	431.091	0.00167559
6.25395e-13	1.23156e-12	1.05869e-14	1.15032e-15	2.56469e-17	8.13175e-13	2.80417e-14	6.45309e-14	2.95799e-10	2.18885e-11	1.42323e-12	3.6189e-09	5.2415e-13	3.17154e-08	1.79497e-16	5.96467e-15	6.44003e-13	7.78347e-13	1.34576e-10	7.74469e-08	1.69977e-13	2.90188e-12	4.56191e-11	4.26385e-13	1.24799e-14	5.84487e-10	7.13982e-13	2.489e-13	1.40968e-12	9.5655e-09	1.00332e-08	1.27351e-11	4.54775e-12	8.63069e-11	2284.48	0.000232207	0.000422137	0.000427951	3.81434e-05	0.000499947	0.0660216	1.61974	0.00298213	0.0789577	0.66852	1.06987e-05	0.00675157	0.0126941	358.781	0.00168756
6.21378e-13	1.12627e-12	1.21444e-14	1.11434e-15	2.57243e-17	7.76059e-13	4.05104e-14	7.61149e-14	3.31414e-10	2.12832e-11	1.41448e-12	3.82744e-09	5.05152e-13	3.09763e-08	1.71881e-16	6.59113e-15	7.07357e-13	8.37507e-13	1.41183e-10	7.77248e-08	2.12003e-13	2.60807e-12	4.38086e-11	4.50785e-13	1.24646e-14	4.96874e-10	7.22988e-13	2.76163e-13	1.51497e-12	1.1156e-08	9.72274e-09	1.39887e-11	4.59907e-12	1.46754e-10	2240.17	0.000233986	0.000436184	0.000381097	3.79431e-05	0.000754811	0.0525164	1.63435	0.00361305	0.0799425	0.780218	5.48375e-06	0.00557824	0.0153148	456.971	0.00142743
6.21348e-13	1.2615e-12	1.21899e-14	1.08103e-15	2.22949e-17	7.87007e-13	3.27471e-14	7.2312e-14	3.14438e-10	2.20391e-11	1.41754e-12	5.02285e-09	5.57894e-13	3.87592e-08	2.1084e-16	6.95891e-15	8.27981e-13	8.39079e-13	1.29832e-10	8.16364e-08	1.99866e-13	3.2159e-12	5.08042e-11	4.72834e-13	1.31958e-14	5.37033e-10	7.2842e-13	2.82357e-13	1.53822e-12	9.19726e-09	9.03649e-09	1.33303e-11	4.14955e-12	8.8685e-11	1694.23	0.000217059	0.000437793	0.000406084	4.92192e-05	0.000723231	0.073267	1.48524	0.00435262	0.0819525	0.573388	5.82495e-06	0.00596999	0.0173568	377.228	0.00146179
6.25438e-13	1.26414e-12	1.2362e-14	1.06145e-15	2.49783e-17	8.05071e-13	3.7845e-14	5.20911e-14	3.37755e-10	2.33545e-11	1.42046e-12	3.46319e-09	8.01981e-13	3.27473e-08	1.56551e-16	8.18678e-15	6.82001e-13	7.56667e-13	1.3223e-10	9.77544e-08	2.20245e-13	3.3344e-12	4.45163e-11	4.45682e-13	1.18679e-14	4.71363e-10	7.04785e-13	2.40535e-13	1.51868e-12	8.21426e-09	1.08841e-08	1.22012e-11	4.55827e-12	8.71639e-11	1578.68	0.000233414	0.000441839	0.000386168	5.1138e-05	0.000544577	0.0848914	1.77399	0.00340605	0.0823974	0.756159	5.32269e-06	0.0054148	0.0155414	467.726	0.00153536
6.22793e-13	1.35014e-12	1.18513e-14	9.96212e-16	2.33673e-17	8.01319e-13	3.14943e-14	6.22903e-14	4.25002e-10	1.73022e-11	1.42428e-12	4.61882e-09	7.65361e-13	2.82613e-08	2.11761e-16	5.58619e-15	7.96891e-13	8.34311e-13	1.34392e-10	8.98609e-08	2.51399e-13	2.61657e-12	4.73346e-11	4.37166e-13	1.21184e-14	4.62755e-10	7.48906e-13	2.76209e-13	1.38054e-12	7.83332e-09	8.60114e-09	1.60221e-11	4.26782e-12	8.13937e-11	1699.94	0.000237809	0.000438201	0.000513746	5.58634e-05	0.000394516	0.0776379	1.40108	0.00421041	0.0696553	0.610503	8.2588e-06	0.00643499	0.0196823	387.586	0.00119433
6.2535e-13	1.28639e-12	1.06185e-14	9.85747e-16	2.44309e-17	7.87833e-13	3.44882e-14	7.49541e-14	3.34341e-10	2.16732e-11	1.44216e-12	3.78577e-09	5.81578e-13	3.09551e-08	1.79304e-16	6.47012e-15	7.61377e-13	7.895e-13	1.48453e-10	8.45337e-08	1.96964e-13	2.90261e-12	4.52437e-11	4.33996e-13	1.19224e-14	4.32142e-10	7.05027e-13	2.84007e-13	1.55089e-12	9.53713e-09	9.44486e-09	1.23099e-11	4.68921e-12	8.5849e-11	1921.67	0.000235446	0.000430788	0.000424853	4.69669e-05	0.000500702	0.0797104	1.55461	0.00338993	0.0723357	0.700818	6.63363e-06	0.00566852	0.015532	416.501	0.00164182
6.2535e-13	1.28639e-12	1.06185e-14	9.85747e-16	2.44309e-17	7.87833e-13	3.44882e-14	7.49541e-14	3.34341e-10	2.16732e-11	1.44216e-12	3.78577e-09	5.81578e-13	3.09551e-08	1.79304e-16	6.47012e-15	7.61377e-13	7.895e-13	1.48453e-10	8.45337e-08	1.96964e-13	2.90261e-12	4.52437e-11	4.33996e-13	1.19224e-14	4.32142e-10	7.05027e-13	2.84007e-13	1.55089e-12	9.53713e-09	9.44486e-09	1.23099e-11	4.68921e-12	8.5849e-11	1921.67	0.000235446	0.000430788	0.000424853	4.69669e-05	0.000500702	0.0797104	1.55461	0.00338993	0.0723357	0.700818	6.63363e-06	0.00566852	0.015532	416.501	0.00164182
6.25109e-13	1.30674e-12	1.98623e-14	1.09608e-15	2.5422e-17	9.1825e-13	2.89556e-14	4.80326e-14	3.76127e-10	2.2609e-11	1.42754e-12	3.92424e-09	5.97731e-13	3.37796e-08	1.94787e-16	6.25922e-15	9.63581e-13	7.76195e-13	1.5111e-10	5.39679e-08	2.23805e-13	2.48634e-12	4.28018e-11	4.18535e-13	1.24314e-14	3.6731e-10	6.93113e-13	2.52909e-13	1.57438e-12	6.18904e-09	8.77802e-09	1.20767e-11	5.76313e-12	8.21972e-11	2433.03	0.000243145	0.00042869	0.000433798	4.50431e-05	0.000343724	0.0814824	1.44353	0.00298399	0.0993885	0.76611	7.97684e-06	0.00701828	0.0192756	506.218	0.00139048
6.21365e-13	1.47369e-12	1.33523e-14	1.43951e-15	2.5457e-17	7.7614e-13	4.41181e-14	8.03249e-14	2.73964e-10	1.9029e-11	1.35323e-12	4.09957e-09	4.79652e-13	2.8544e-08	1.68922e-16	5.30105e-15	8.65183e-13	8.26547e-13	1.03943e-10	8.03822e-08	2.02853e-13	3.56798e-12	4.48747e-11	4.25432e-13	1.45615e-14	9.09042e-10	7.03571e-13	2.49742e-13	1.31028e-12	1.2333e-08	8.82036e-09	1.1014e-11	4.97529e-12	1.05356e-10	2716.64	0.000239123	0.000452687	0.000324085	5.64793e-05	0.000737307	0.0978895	1.23521	0.00499682	0.146058	0.596966	2.11089e-06	0.00608359	0.0190913	511.338	0.00128825
6.2516e-13	1.25962e-12	1.14873e-14	7.94477e-16	2.30362e-17	7.80339e-13	4.40806e-14	7.96886e-14	3.95867e-10	2.00262e-11	1.41434e-12	3.68122e-09	5.96515e-13	3.09312e-08	1.68156e-16	6.0578e-15	8.05866e-13	7.52703e-13	1.37773e-10	7.64621e-08	1.61769e-13	3.25053e-12	4.33611e-11	4.11052e-13	1.08818e-14	4.60454e-10	6.90211e-13	2.69812e-13	1.38825e-12	6.79741e-09	1.10956e-08	1.35339e-11	3.96923e-12	1.0398e-10	2265.41	0.000212749	0.000436745	0.000455312	4.76969e-05	0.000477706	0.056334	1.28292	0.00300995	0.0765508	0.649059	6.03504e-06	0.00612634	0.0176299	597.391	0.00195788
6.2535e-13	1.28639e-12	1.06185e-14	9.85747e-16	2.44309e-17	7.87833e-13	3.44882e-14	7.49541e-14	3.34341e-10	2.16732e-11	1.44216e-12	3.78577e-09	5.81578e-13	3.09551e-08	1.79304e-16	6.47012e-15	7.61377e-13	7.895e-13	1.48453e-10	8.45337e-08	1.96964e-13	2.90261e-12	4.52437e-11	4.33996e-13	1.19224e-14	4.32142e-10	7.05027e-13	2.84007e-13	1.55089e-12	9.53713e-09	9.44486e-09	1.23099e-11	4.68921e-12	8.5849e-11	1921.67	0.000235446	0.000430788	0.000424853	4.69669e-05	0.000500702	0.0797104	1.55461	0.00338993	0.0723357	0.700818	6.63363e-06	0.00566852	0.015532	416.501	0.00164182
6.2535e-13	1.28639e-12	1.06185e-14	9.85747e-16	2.44309e-17	7.87833e-13	3.44882e-14	7.49541e-14	3.34341e-10	2.16732e-11	1.44216e-12	3.78577e-09	5.81578e-13	3.09551e-08	1.79304e-16	6.47012e-15	7.61377e-13	7.895e-13	1.48453e-10	8.45337e-08	1.96964e-13	2.90261e-12	4.52437e-11	4.33996e-13	1.19224e-14	4.32142e-10	7.05027e-13	2.84007e-13	1.55089e-12	9.53713e-09	9.44486e-09	1.23099e-11	4.68921e-12	8.5849e-11	1921.67	0.000235446	0.000430788	0.000424853	4.69669e-05	0.000500702	0.0797104	1.55461	0.00338993	0.0723357	0.700818	6.63363e-06	0.00566852	0.015532	416.501	0.00164182
6.2535e-13	1.28639e-12	1.06185e-14	9.85747e-16	2.44309e-17	7.87833e-13	3.44882e-14	7.49541e-14	3.34341e-10	2.16732e-11	1.44216e-12	3.78577e-09	5.81578e-13	3.09551e-08	1.79304e-16	6.47012e-15	7.61377e-13	7.895e-13	1.48453e-10	8.45337e-08	1.96964e-13	2.90261e-12	4.52437e-11	4.33996e-13	1.19224e-14	4.32142e-10	7.05027e-13	2.84007e-13	1.55089e-12	9.53713e-09	9.44486e-09	1.23099e-11	4.68921e-12	8.5849e-11	1921.67	0.000235446	0.000430788	0.000424853	4.69669e-05	0.000500702	0.0797104	1.55461	0.00338993	0.0723357	0.700818	6.63363e-06	0.00566852	0.015532	416.501	0.00164182
6.2535e-13	1.28639e-12	1.06185e-14	9.85747e-16	2.44309e-17	7.87833e-13	3.44882e-14	7.49541e-14	3.34341e-10	2.16732e-11	1.44216e-12	3.78577e-09	5.81578e-13	3.09551e-08	1.79304e-16	6.47012e-15	7.61377e-13	7.895e-13	1.48453e-10	8.45337e-08	1.96964e-13	2.90261e-12	4.52437e-11	4.33996e-13	1.19224e-14	4.32142e-10	7.05027e-13	2.84007e-13	1.55089e-12	9.53713e-09	9.44486e-09	1.23099e-11	4.68921e-12	8.5849e-11	1921.67	0.000235446	0.000430788	0.000424853	4.69669e-05	0.000500702	0.0797104	1.55461	0.00338993	0.0723357	0.700818	6.63363e-06	0.00566852	0.015532	416.501	0.00164182
6.25525e-13	1.29896e-12	1.22281e-14	1.02625e-15	2.37241e-17	8.36119e-13	3.84812e-14	8.63471e-14	3.08064e-10	2.3004e-11	1.4215e-12	3.94845e-09	5.2125e-13	2.92184e-08	2.08495e-16	6.2884e-15	8.47317e-13	8.57072e-13	1.39367e-10	9.77641e-08	2.25417e-13	3.00421e-12	4.9064e-11	4.72537e-13	1.19613e-14	3.80143e-10	7.51348e-13	2.78834e-13	1.47256e-12	8.18519e-09	1.08627e-08	1.24405e-11	4.14804e-12	7.08127e-11	1727.26	0.000226108	0.000437891	0.000312686	4.65904e-05	0.000558761	0.094303	1.80497	0.00286687	0.0718938	0.712523	5.44414e-06	0.00649831	0.0254094	368.576	0.00170205
6.24627e-13	1.29763e-12	1.57256e-14	1.16624e-15	3.95652e-17	7.82089e-13	3.9511e-14	8.65573e-14	3.22769e-10	2.06966e-11	1.32721e-12	4.61949e-09	4.2829e-13	2.87599e-08	2.26447e-16	6.10645e-15	8.36497e-13	8.43982e-13	1.65212e-10	8.98099e-08	2.23684e-13	2.94983e-12	4.90873e-11	4.44463e-13	1.07471e-14	3.97955e-10	7.04344e-13	2.13276e-13	1.26937e-12	7.58525e-09	9.94238e-09	1.57804e-11	4.89353e-12	1.07682e-10	1182.6	0.000227677	0.000429879	0.0003832	3.42887e-05	0.000508759	0.0775313	1.37407	0.002935	0.0609509	0.585876	8.33971e-06	0.00569463	0.0157076	485.386	0.00163481
6.24801e-13	1.22463e-12	1.20398e-14	1.24565e-15	2.24551e-17	7.82584e-13	4.13233e-14	7.65812e-14	3.45396e-10	2.39717e-11	1.3981e-12	4.04482e-09	5.03898e-13	3.24754e-08	2.09589e-16	6.73839e-15	7.81018e-13	8.18356e-13	1.35468e-10	5.82881e-08	1.81455e-13	3.0235e-12	4.73104e-11	4.68357e-13	1.22222e-14	4.23219e-10	7.14752e-13	2.49258e-13	1.52851e-12	1.04344e-08	1.08449e-08	1.03377e-11	4.56763e-12	9.05901e-11	1878.14	0.000229584	0.000451805	0.000438074	4.80317e-05	0.000418092	0.0709641	1.7093	0.00446818	0.0573185	0.866668	6.63515e-06	0.00524133	0.0194258	250.137	0.00159143
6.2535e-13	1.28639e-12	1.06185e-14	9.85747e-16	2.44309e-17	7.87833e-13	3.44882e-14	7.49541e-14	3.34341e-10	2.16732e-11	1.44216e-12	3.78577e-09	5.81578e-13	3.09551e-08	1.79304e-16	6.47012e-15	7.61377e-13	7.895e-13	1.48453e-10	8.45337e-08	1.96964e-13	2.90261e-12	4.52437e-11	4.33996e-13	1.19224e-14	4.32142e-10	7.05027e-13	2.84007e-13	1.55089e-12	9.53713e-09	9.44486e-09	1.23099e-11	4.68921e-12	8.5849e-11	1921.67	0.000235446	0.000430788	0.000424853	4.69669e-05	0.000500702	0.0797104	1.55461	0.00338993	0.0723357	0.700818	6.63363e-06	0.00566852	0.015532	416.501	0.00164182
6.25334e-13	1.37746e-12	1.11823e-14	9.70015e-16	2.38576e-17	7.30012e-13	3.35395e-14	6.7724e-14	3.56001e-10	1.99547e-11	1.42206e-12	4.0797e-09	5.5599e-13	3.32527e-08	1.93547e-16	6.04802e-15	8.86838e-13	7.22543e-13	1.36414e-10	7.8457e-08	2.01301e-13	2.84221e-12	4.20016e-11	3.81528e-13	1.12709e-14	4.04484e-10	7.25437e-13	2.6556e-13	1.5803e-12	1.02515e-08	1.03095e-08	1.15479e-11	4.87424e-12	1.30294e-10	2280.17	0.000226832	0.000454086	0.00044433	4.58747e-05	0.000562689	0.0870153	1.45128	0.00429749	0.0782738	0.520838	7.51953e-06	0.00578785	0.0153568	379.78	0.00173405
6.2535e-13	1.28639e-12	1.06185e-14	9.85747e-16	2.44309e-17	7.87833e-13	3.44882e-14	7.49541e-14	3.34341e-10	2.16732e-11	1.44216e-12	3.78577e-09	5.81578e-13	3.09551e-08	1.79304e-16	6.47012e-15	7.61377e-13	7.895e-13	1.48453e-10	8.45337e-08	1.96964e-13	2.90261e-12	4.52437e-11	4.33996e-13	1.19224e-14	4.32142e-10	7.05027e-13	2.84007e-13	1.55089e-12	9.53713e-09	9.44486e-09	1.23099e-11	4.68921e-12	8.5849e-11	1921.67	0.000235446	0.000430788	0.000424853	4.69669e-05	0.000500702	0.0797104	1.55461	0.00338993	0.0723357	0.700818	6.63363e-06	0.00566852	0.015532	416.501	0.00164182
6.25737e-13	1.19472e-12	1.32095e-14	9.47092e-16	2.1294e-17	7.39511e-13	3.59419e-14	1.07913e-13	3.58911e-10	2.30419e-11	1.38601e-12	3.76331e-09	5.74507e-13	2.77055e-08	1.99105e-16	6.46335e-15	6.73985e-13	8.82323e-13	1.5555e-10	9.17461e-08	2.0261e-13	3.32108e-12	4.75311e-11	4.70117e-13	1.33943e-14	3.99936e-10	7.66358e-13	2.57692e-13	1.54781e-12	8.79474e-09	9.89279e-09	1.23701e-11	4.97399e-12	7.72634e-11	1917.44	0.000237556	0.000439096	0.000411055	5.14092e-05	0.000474157	0.0670429	1.70766	0.00332521	0.080485	0.787796	6.72574e-06	0.00612042	0.0181969	419.007	0.00179299
6.2467e-13	1.25636e-12	1.13882e-14	9.42086e-16	2.53731e-17	7.58209e-13	3.74427e-14	7.34843e-14	3.25612e-10	2.1515e-11	1.41537e-12	3.8616e-09	5.84414e-13	3.03909e-08	1.59513e-16	6.88177e-15	6.88572e-13	8.07336e-13	1.47231e-10	8.8646e-08	1.86615e-13	3.08706e-12	4.15018e-11	4.41901e-13	1.23626e-14	4.85055e-10	7.06628e-13	2.81392e-13	1.53184e-12	1.08937e-08	9.37385e-09	1.28964e-11	4.76268e-12	1.00292e-10	2206.82	0.000223564	0.000422179	0.000539797	4.52635e-05	0.000471637	0.0837977	1.69394	0.00320634	0.0360107	0.467903	7.79514e-06	0.00624659	0.0155803	401.448	0.00170352
6.25306e-13	1.28423e-12	1.08238e-14	1.20186e-15	2.17705e-17	7.86503e-13	3.92589e-14	7.71406e-14	3.01354e-10	1.96041e-11	1.35349e-12	3.4547e-09	5.88307e-13	3.35972e-08	2.36326e-16	6.2198e-15	6.8409e-13	8.31988e-13	1.33098e-10	7.77857e-08	1.96957e-13	3.34628e-12	4.61307e-11	4.35092e-13	1.08042e-14	4.18341e-10	7.38591e-13	2.38631e-13	1.57628e-12	9.92324e-09	9.23537e-09	1.00006e-11	3.94088e-12	9.47701e-11	1967.99	0.000224683	0.00044722	0.000353377	5.02239e-05	0.000348319	0.0784177	1.54299	0.00275267	0.0798308	0.36987	5.58777e-06	0.00748757	0.0175968	450.086	0.00141976
6.25219e-13	1.27126e-12	1.07443e-14	8.76566e-16	2.42787e-17	7.93258e-13	3.38468e-14	6.43807e-14	3.26348e-10	2.4849e-11	1.43609e-12	4.49302e-09	6.02045e-13	2.68986e-08	1.66244e-16	6.95764e-15	5.04133e-13	7.83278e-13	1.6899e-10	8.67944e-08	1.69389e-13	3.15119e-12	4.79215e-11	4.4731e-13	9.37397e-15	4.62526e-10	7.05058e-13	2.63266e-13	1.3582e-12	8.77961e-09	1.10697e-08	1.21939e-11	4.96679e-12	9.55452e-11	1834.17	0.000231009	0.000445455	0.000385663	4.34503e-05	0.000463413	0.0815661	1.66859	0.00321005	0.0733992	0.696068	7.646e-06	0.00648596	0.016109	507.791	0.0018426
6.24926e-13	1.47679e-12	1.04577e-14	9.75654e-16	3.29894e-17	7.85177e-13	3.80506e-14	6.73536e-14	3.02048e-10	1.9979e-11	1.45387e-12	4.47574e-09	5.50653e-13	3.54895e-08	1.23665e-16	5.56894e-15	8.91321e-13	7.99977e-13	1.81232e-10	8.73004e-08	1.61254e-13	2.95874e-12	4.64427e-11	4.34001e-13	1.16942e-14	3.80211e-10	7.31641e-13	2.99705e-13	1.37603e-12	7.73415e-09	1.01316e-08	1.28333e-11	4.53768e-12	1.23542e-10	1565.25	0.00022338	0.000457701	0.000331508	4.71527e-05	0.000520037	0.0879222	1.19756	0.00228313	0.0846007	0.461667	8.60761e-06	0.00655036	0.0143104	433.099	0.00186057
6.24041e-13	1.27195e-12	1.13453e-14	9.68725e-16	2.08072e-17	8.58014e-13	3.19773e-14	5.6408e-14	3.02223e-10	1.96039e-11	1.43524e-12	4.53158e-09	6.40644e-13	4.73137e-08	2.15242e-16	7.21203e-15	7.3142e-13	8.19567e-13	1.66397e-10	9.90338e-08	1.80071e-13	3.17349e-12	4.53518e-11	4.60956e-13	8.55383e-15	4.14028e-10	7.23221e-13	2.48664e-13	1.43415e-12	9.33381e-09	9.90992e-09	1.55566e-11	5.09653e-12	8.01927e-11	1636.97	0.000230449	0.00043654	0.000432832	3.53332e-05	0.000497286	0.0839961	1.63463	0.00316403	0.101531	0.756777	6.80526e-06	0.00596063	0.0118651	370.779	0.00183573
6.25594e-13	1.43074e-12	1.18889e-14	9.48981e-16	1.76736e-17	7.27704e-13	4.95345e-14	8.99084e-14	3.16411e-10	2.06732e-11	1.41861e-12	3.68376e-09	6.13103e-13	3.72543e-08	1.44312e-16	6.62671e-15	7.98667e-13	7.44541e-13	1.6287e-10	7.94738e-08	1.87215e-13	3.10561e-12	4.85649e-11	4.33163e-13	1.31182e-14	4.4471e-10	6.80489e-13	2.93914e-13	1.64052e-12	1.15024e-08	1.11046e-08	1.11843e-11	5.47959e-12	7.99501e-11	2180.6	0.000217471	0.000443083	0.000484652	5.00407e-05	0.000659518	0.0898736	1.26579	0.00370783	0.0660792	0.698844	6.04628e-06	0.00497748	0.0145889	459.759	0.00170663
6.2535e-13	1.28639e-12	1.06185e-14	9.85747e-16	2.44309e-17	7.87833e-13	3.44882e-14	7.49541e-14	3.34341e-10	2.16732e-11	1.44216e-12	3.78577e-09	5.81578e-13	3.09551e-08	1.79304e-16	6.47012e-15	7.61377e-13	7.895e-13	1.48453e-10	8.45337e-08	1.96964e-13	2.90261e-12	4.52437e-11	4.33996e-13	1.19224e-14	4.32142e-10	7.05027e-13	2.84007e-13	1.55089e-12	9.53713e-09	9.44486e-09	1.23099e-11	4.68921e-12	8.5849e-11	1921.67	0.000235446	0.000430788	0.000424853	4.69669e-05	0.000500702	0.0797104	1.55461	0.00338993	0.0723357	0.700818	6.63363e-06	0.00566852	0.015532	416.501	0.00164182
6.23764e-13	1.26685e-12	1.12035e-14	8.84822e-16	2.88767e-17	8.29668e-13	3.37917e-14	7.58151e-14	4.02032e-10	2.12415e-11	1.40396e-12	4.29555e-09	5.9942e-13	3.67561e-08	1.95838e-16	5.62301e-15	7.31463e-13	8.19355e-13	1.35875e-10	7.94668e-08	1.97293e-13	2.75616e-12	4.82948e-11	4.62188e-13	1.10121e-14	5.3652e-10	6.96177e-13	2.63853e-13	1.60616e-12	1.13734e-08	9.96673e-09	1.3368e-11	4.62095e-12	9.0554e-11	1994.44	0.0002145	0.000435377	0.000459411	4.86447e-05	0.000608938	0.0846674	1.70566	0.00361998	0.0851002	0.627587	6.03778e-06	0.00614986	0.0162674	445.591	0.00156642
6.21297e-13	1.34905e-12	1.06744e-14	7.70958e-16	2.26246e-17	7.029e-13	2.96041e-14	7.10585e-14	3.47564e-10	1.83899e-11	1.37561e-12	3.49942e-09	5.76741e-13	2.56975e-08	2.39731e-16	6.21131e-15	7.68308e-13	8.46807e-13	1.79153e-10	9.98856e-08	1.85512e-13	3.23409e-12	4.55888e-11	4.66229e-13	1.1762e-14	3.61801e-10	8.00409e-13	2.35723e-13	1.64383e-12	1.1022e-08	1.05717e-08	1.15196e-11	3.8146e-12	9.82848e-11	2161.3	0.0002443	0.000449082	0.000416502	4.97525e-05	0.000427897	0.0833243	1.42426	0.00286253	0.0387562	0.745959	9.27856e-06	0.00517938	0.0182358	491.367	0.00115951
6.2473e-13	1.23153e-12	1.87137e-14	1.01238e-15	1.87909e-17	7.72456e-13	3.85996e-14	7.81029e-14	3.5997e-10	2.1613e-11	1.34767e-12	3.9217e-09	6.1142e-13	3.30097e-08	1.47924e-16	7.41998e-15	9.32473e-13	7.84723e-13	1.28521e-10	8.83319e-08	2.24895e-13	3.6045e-12	4.41581e-11	4.15405e-13	1.07323e-14	4.20466e-10	6.9331e-13	2.2305e-13	1.55332e-12	1.14249e-08	1.05722e-08	1.09948e-11	5.44064e-12	8.60444e-11	2001.4	0.000232425	0.000437561	0.000370506	4.5383e-05	0.000582744	0.0672493	1.5611	0.00117891	0.0813345	0.64325	5.89526e-06	0.00557908	0.0175715	517.743	0.0017227
6.23797e-13	1.22748e-12	1.21649e-14	9.84107e-16	1.89266e-17	7.71195e-13	4.42971e-14	7.32862e-14	2.43577e-10	2.05816e-11	1.42943e-12	4.50484e-09	6.16965e-13	3.32351e-08	1.66909e-16	5.6835e-15	7.5119e-13	7.39741e-13	1.47581e-10	7.69637e-08	1.76668e-13	3.1917e-12	4.99585e-11	4.13215e-13	1.362e-14	4.1691e-10	6.92295e-13	2.90994e-13	1.34884e-12	7.40753e-09	1.05671e-08	1.18463e-11	4.9238e-12	9.77772e-11	1421.96	0.000224002	0.000416821	0.000395342	4.67185e-05	0.000586053	0.0710569	1.58833	0.00339364	0.0714984	0.827783	6.32313e-06	0.0058001	0.0160489	366.708	0.00136783
6.255e-13	1.2526e-12	1.22732e-14	9.8514e-16	2.42189e-17	7.8308e-13	3.66536e-14	7.10756e-14	2.85141e-10	2.51967e-11	1.43065e-12	3.0389e-09	6.32862e-13	2.91677e-08	3.19435e-16	7.31372e-15	6.11477e-13	7.88394e-13	1.17215e-10	8.223e-08	1.84269e-13	3.48612e-12	4.44047e-11	4.21737e-13	1.05111e-14	3.24158e-10	7.10831e-13	2.7063e-13	1.34166e-12	1.1552e-08	8.27839e-09	1.20921e-11	3.75572e-12	1.04471e-10	2053.75	0.000226823	0.000420561	0.000366069	4.21816e-05	0.000367872	0.066852	1.47793	0.00226094	0.0819383	0.726351	7.08787e-06	0.00669862	0.0149392	390.112	0.00178503
6.21289e-13	1.20777e-12	1.10431e-14	9.65025e-16	2.16342e-17	7.90275e-13	3.49122e-14	5.86427e-14	2.92633e-10	2.0076e-11	1.38796e-12	4.16567e-09	4.49241e-13	3.0022e-08	2.3484e-16	6.07183e-15	6.16683e-13	7.58521e-13	1.59971e-10	7.30271e-08	1.96549e-13	2.72454e-12	3.86117e-11	4.27735e-13	1.21868e-14	3.87277e-10	6.76355e-13	2.30951e-13	1.40401e-12	9.33733e-09	9.51143e-09	1.00849e-11	4.5579e-12	9.30594e-11	1830.09	0.00021954	0.000429324	0.00039783	4.28531e-05	0.000411475	0.0771568	1.79669	0.00284204	0.0650372	0.720121	5.89983e-06	0.0056454	0.0177566	534.813	0.00126737
6.24859e-13	1.35681e-12	1.05723e-14	1.03866e-15	2.3398e-17	7.83489e-13	4.00375e-14	6.77444e-14	3.00157e-10	1.43451e-11	1.41303e-12	3.22683e-09	5.75425e-13	2.37755e-08	1.91274e-16	7.11941e-15	9.14156e-13	8.21105e-13	1.34689e-10	9.29827e-08	2.42963e-13	2.58506e-12	5.1041e-11	4.67088e-13	1.23758e-14	3.4488e-10	7.27354e-13	2.34894e-13	1.47039e-12	8.64075e-09	1.10003e-08	1.07745e-11	4.52297e-12	8.04547e-11	1648.84	0.00021669	0.000455942	0.000582451	9.27444e-05	0.00042218	0.0958993	1.68542	0.00275083	0.0786774	0.970093	6.2485e-06	0.0051457	0.0161066	354.22	0.00175794
6.24036e-13	1.32234e-12	1.34767e-14	8.65063e-16	2.32929e-17	7.34772e-13	3.41462e-14	8.44486e-14	3.82568e-10	2.17054e-11	1.38512e-12	4.57077e-09	5.45344e-13	2.546e-08	2.35407e-16	8.06815e-15	8.80323e-13	7.87488e-13	1.53058e-10	7.11316e-08	1.64381e-13	3.41118e-12	4.3592e-11	4.55509e-13	1.09048e-14	3.811e-10	7.64661e-13	2.4941e-13	1.35248e-12	6.10143e-09	1.05121e-08	1.36902e-11	4.59109e-12	8.59693e-11	1769.29	0.000236038	0.00043106	0.000479089	5.8576e-05	0.000493546	0.0853963	1.47206	0.00556596	0.0940164	0.636979	5.56553e-06	0.00460733	0.0181595	381.28	0.00177432
6.23265e-13	1.25844e-12	1.07608e-14	9.07626e-16	2.09917e-17	7.8806e-13	4.04464e-14	6.00401e-14	3.11101e-10	1.98157e-11	1.41142e-12	4.91378e-09	6.29836e-13	2.73098e-08	1.57729e-16	7.0693e-15	9.52829e-13	8.53975e-13	1.36366e-10	7.96861e-08	1.83212e-13	3.02451e-12	4.66367e-11	4.50446e-13	1.17345e-14	3.80907e-10	7.24687e-13	2.48901e-13	1.44515e-12	1.05175e-08	1.16496e-08	1.14991e-11	4.73538e-12	9.06747e-11	2367.77	0.000239547	0.000434177	0.000444009	5.38355e-05	0.000400357	0.0731061	1.52413	0.00383103	0.0655139	0.691306	5.96734e-06	0.00645672	0.0165609	449.203	0.00159431
6.2535e-13	1.28639e-12	1.06185e-14	9.85747e-16	2.44309e-17	7.87833e-13	3.44882e-14	7.49541e-14	3.34341e-10	2.16732e-11	1.44216e-12	3.78577e-09	5.81578e-13	3.09551e-08	1.79304e-16	6.47012e-15	7.61377e-13	7.895e-13	1.48453e-10	8.45337e-08	1.96964e-13	2.90261e-12	4.52437e-11	4.33996e-13	1.19224e-14	4.32142e-10	7.05027e-13	2.84007e-13	1.55089e-12	9.53713e-09	9.44486e-09	1.23099e-11	4.68921e-12	8.5849e-11	1921.67	0.000235446	0.000430788	0.000424853	4.69669e-05	0.000500702	0.0797104	1.55461	0.00338993	0.0723357	0.700818	6.63363e-06	0.00566852	0.015532	416.501	0.00164182
6.2532e-13	1.26313e-12	1.39132e-14	1.03743e-15	2.56865e-17	7.72236e-13	3.49151e-14	8.22443e-14	4.85829e-10	2.37352e-11	1.3904e-12	4.74147e-09	5.65321e-13	2.81118e-08	1.75811e-16	6.54584e-15	5.97349e-13	8.66742e-13	1.41166e-10	7.9434e-08	2.01628e-13	3.60234e-12	5.2046e-11	4.43315e-13	1.78953e-14	4.94757e-10	7.15189e-13	2.68067e-13	1.53717e-12	1.00428e-08	1.05122e-08	1.3592e-11	4.25191e-12	9.98395e-11	2247.46	0.000230067	0.000455809	0.000383366	4.54975e-05	0.000438366	0.0716658	1.48784	0.0032085	0.0898326	0.452956	8.39444e-06	0.00614	0.0210877	386.625	0.00159072
6.25666e-13	1.24448e-12	1.23121e-14	9.67901e-16	2.13479e-17	7.97096e-13	3.89256e-14	7.5294e-14	3.0669e-10	2.19058e-11	1.41977e-12	4.14845e-09	5.78875e-13	2.47904e-08	1.56465e-16	7.79623e-15	7.26863e-13	8.02256e-13	1.76873e-10	7.94459e-08	2.33611e-13	2.87072e-12	4.48139e-11	4.16113e-13	9.69766e-15	3.9582e-10	6.75454e-13	2.74943e-13	1.35212e-12	9.42649e-09	9.72487e-09	1.34395e-11	3.93567e-12	8.31544e-11	1352.52	0.000233854	0.000451828	0.000440049	4.37618e-05	0.000574131	0.0672094	1.40947	0.00280817	0.0647446	0.574138	7.95725e-06	0.00622374	0.0142914	418.309	0.00162207
6.24807e-13	1.35221e-12	1.16151e-14	9.74627e-16	2.58917e-17	8.31244e-13	4.80914e-14	7.08448e-14	3.65862e-10	2.62121e-11	1.40314e-12	3.02224e-09	5.20924e-13	3.14122e-08	1.92247e-16	5.60996e-15	6.63715e-13	8.69861e-13	1.09754e-10	8.31627e-08	1.79511e-13	3.03898e-12	6.11348e-11	4.90644e-13	1.18251e-14	3.93919e-10	8.07529e-13	2.62195e-13	1.33184e-12	1.03012e-08	1.18925e-08	1.20956e-11	4.57443e-12	1.51332e-10	2128.36	0.000226907	0.000428283	0.00039487	5.31186e-05	0.000554214	0.0910998	1.45739	0.00292228	0.0740748	0.687506	5.97374e-06	0.00587622	0.0157889	270.118	0.00158129
6.23878e-13	1.35899e-12	1.08283e-14	1.04107e-15	3.15537e-17	7.68956e-13	3.89325e-14	6.61897e-14	3.33422e-10	1.82345e-11	1.40255e-12	3.56744e-09	5.78119e-13	3.02768e-08	1.72817e-16	6.07106e-15	7.10303e-13	7.90462e-13	1.40532e-10	8.09565e-08	1.95846e-13	2.73338e-12	4.59446e-11	4.17698e-13	1.64454e-14	4.57105e-10	7.06431e-13	2.69471e-13	1.48234e-12	1.06905e-08	9.36618e-09	1.242e-11	4.7761e-12	9.1278e-11	2035.75	0.000236215	0.000440077	0.000428584	5.32908e-05	0.000503735	0.0659065	1.18258	0.00354826	0.0510188	0.360012	6.03075e-06	0.00554415	0.0169978	412.091	0.00149205
6.25142e-13	1.32783e-12	1.18561e-14	9.36551e-16	3.49141e-17	7.97427e-13	3.25417e-14	8.13095e-14	3.76093e-10	2.12241e-11	1.40539e-12	2.79123e-09	6.2362e-13	3.64755e-08	1.26237e-16	6.48072e-15	5.64819e-13	8.52505e-13	1.3929e-10	6.40604e-08	1.77419e-13	3.09217e-12	4.7416e-11	4.3303e-13	1.10545e-14	4.54468e-10	7.49327e-13	2.66993e-13	1.48598e-12	1.05399e-08	9.87086e-09	1.06307e-11	4.87731e-12	8.76009e-11	1857.72	0.000232067	0.000422884	0.000440346	4.30716e-05	0.000364689	0.0816424	1.43435	0.00296896	0.0676681	0.522068	6.81272e-06	0.00565809	0.0199206	618.306	0.00167586
6.21299e-13	1.33915e-12	1.1231e-14	8.03062e-16	2.56204e-17	9.49499e-13	3.86072e-14	7.29529e-14	4.38222e-10	2.40226e-11	1.41136e-12	3.75501e-09	7.56935e-13	2.77135e-08	1.38767e-16	8.03769e-15	6.8821e-13	8.18519e-13	1.41971e-10	7.89855e-08	2.7777e-13	2.85874e-12	4.92596e-11	4.03725e-13	8.58766e-15	3.83385e-10	6.4156e-13	2.63861e-13	1.34742e-12	1.21267e-08	9.65483e-09	1.26123e-11	4.25372e-12	9.43297e-11	1912.83	0.000234999	0.000406881	0.000453268	4.61204e-05	0.000516305	0.0801916	1.43723	0.00290376	0.086393	0.782887	6.0874e-06	0.0063301	0.0160654	363.521	0.00134713
6.21344e-13	1.11064e-12	1.10018e-14	8.86579e-16	1.67902e-17	7.53938e-13	4.54921e-14	7.65912e-14	3.43091e-10	2.15575e-11	1.35345e-12	3.0854e-09	5.66817e-13	3.93775e-08	1.34428e-16	6.2044e-15	7.7249e-13	7.55857e-13	1.5114e-10	8.29355e-08	1.84468e-13	2.93974e-12	4.44512e-11	3.90938e-13	1.23316e-14	3.52867e-10	6.73076e-13	2.39185e-13	1.29613e-12	9.61238e-09	1.04604e-08	1.57624e-11	4.7782e-12	9.44785e-11	1869.27	0.000223249	0.000438334	0.000420472	4.46504e-05	0.000598529	0.0484929	1.69333	0.00342393	0.0693663	0.641571	7.36992e-06	0.0059008	0.0159373	373.288	0.001251
6.23571e-13	1.35073e-12	1.16251e-14	1.09268e-15	2.48584e-17	7.49148e-13	4.16609e-14	8.95228e-14	2.84444e-10	2.19395e-11	1.40429e-12	3.11209e-09	6.16776e-13	2.71066e-08	1.66021e-16	6.15941e-15	9.17019e-13	7.72495e-13	1.5216e-10	7.40817e-08	1.83405e-13	3.14786e-12	5.10013e-11	4.24263e-13	1.88813e-14	4.18637e-10	7.015e-13	2.83629e-13	1.25032e-12	1.05247e-08	8.477e-09	1.57974e-11	4.48838e-12	1.07036e-10	1636.85	0.000245287	0.00043994	0.000422925	5.05365e-05	0.000452922	0.0728299	1.22	0.00430427	0.0673941	0.601139	6.42656e-06	0.00448667	0.0148871	438.399	0.00175057
6.2535e-13	1.28639e-12	1.06185e-14	9.85747e-16	2.44309e-17	7.87833e-13	3.44882e-14	7.49541e-14	3.34341e-10	2.16732e-11	1.44216e-12	3.78577e-09	5.81578e-13	3.09551e-08	1.79304e-16	6.47012e-15	7.61377e-13	7.895e-13	1.48453e-10	8.45337e-08	1.96964e-13	2.90261e-12	4.52437e-11	4.33996e-13	1.19224e-14	4.32142e-10	7.05027e-13	2.84007e-13	1.55089e-12	9.53713e-09	9.44486e-09	1.23099e-11	4.68921e-12	8.5849e-11	1921.67	0.000235446	0.000430788	0.000424853	4.69669e-05	0.000500702	0.0797104	1.55461	0.00338993	0.0723357	0.700818	6.63363e-06	0.00566852	0.015532	416.501	0.00164182
6.25459e-13	1.18051e-12	1.1069e-14	1.06711e-15	2.64569e-17	7.97294e-13	2.76614e-14	5.81791e-14	3.57607e-10	1.9482e-11	1.45077e-12	3.78973e-09	4.74277e-13	2.47904e-08	1.67909e-16	5.80245e-15	7.35592e-13	7.4432e-13	1.54272e-10	8.92938e-08	1.7802e-13	2.95948e-12	4.237e-11	4.24832e-13	1.12433e-14	3.88592e-10	6.75804e-13	2.74904e-13	1.38632e-12	9.93516e-09	9.97299e-09	1.06471e-11	4.50394e-12	7.92784e-11	1690.94	0.00022901	0.000458042	0.000406354	4.12497e-05	0.000558609	0.0793963	2.1162	0.00335665	0.0658044	0.636421	6.44055e-06	0.00606318	0.0130262	323.895	0.00150717
6.25209e-13	1.41751e-12	1.1203e-14	9.95844e-16	1.69431e-17	7.72891e-13	4.31015e-14	8.58875e-14	3.04598e-10	2.16353e-11	1.40563e-12	4.1856e-09	5.33996e-13	4.97429e-08	1.62653e-16	5.72483e-15	7.21004e-13	7.17489e-13	1.44319e-10	7.93259e-08	1.54652e-13	3.22626e-12	4.66293e-11	4.04737e-13	1.28261e-14	4.41978e-10	7.01992e-13	2.74604e-13	1.43048e-12	8.57301e-09	9.97806e-09	1.23593e-11	4.7899e-12	9.10322e-11	1391.71	0.000220366	0.000418042	0.000371484	4.76757e-05	0.000659138	0.0909225	1.37101	0.00304338	0.0720206	0.727131	6.16709e-06	0.0040836	0.0172076	424.377	0.00157082
6.25557e-13	1.22258e-12	1.08822e-14	1.04503e-15	2.68168e-17	7.52085e-13	3.29151e-14	8.8234e-14	3.29183e-10	1.8107e-11	1.34042e-12	3.16582e-09	6.10842e-13	3.24642e-08	1.67016e-16	6.51632e-15	8.3087e-13	7.43221e-13	1.32149e-10	7.76054e-08	1.5603e-13	2.90014e-12	3.63199e-11	4.02137e-13	9.94342e-15	5.32845e-10	6.5778e-13	1.96081e-13	1.40076e-12	9.70097e-09	8.52052e-09	1.69169e-11	4.87093e-12	9.0543e-11	2129.53	0.000218393	0.000426799	0.000335421	4.90373e-05	0.000449131	0.0641156	1.62453	0.0038596	0.0758069	0.731451	6.84506e-06	0.00567642	0.0164059	380.396	0.00165634
6.24555e-13	1.28894e-12	1.08121e-14	1.12641e-15	2.4789e-17	8.15375e-13	3.47865e-14	7.26652e-14	3.55793e-10	2.20481e-11	1.41036e-12	3.44287e-09	5.40488e-13	3.47301e-08	1.65203e-16	6.68854e-15	7.95828e-13	8.43994e-13	1.56134e-10	8.05791e-08	2.08107e-13	3.03057e-12	4.89266e-11	4.62307e-13	1.50705e-14	4.37188e-10	7.4087e-13	2.83428e-13	1.55196e-12	9.46152e-09	9.79237e-09	1.18842e-11	4.38332e-12	9.27084e-11	2318.93	0.000237426	0.000427871	0.000481387	4.96965e-05	0.000456672	0.0839545	1.64521	0.003647	0.0565293	0.385039	5.83459e-06	0.00558356	0.015933	353.64	0.00142094
6.25857e-13	1.42755e-12	1.06666e-14	8.66743e-16	2.87581e-17	7.26872e-13	4.57338e-14	7.24558e-14	3.2581e-10	1.9264e-11	1.42161e-12	3.52382e-09	5.55549e-13	2.05476e-08	1.75127e-16	6.99622e-15	8.90757e-13	7.98833e-13	1.546e-10	9.04029e-08	2.17071e-13	3.38995e-12	4.25875e-11	4.27385e-13	9.80754e-15	4.69682e-10	7.3294e-13	2.86033e-13	1.38842e-12	8.76561e-09	1.03397e-08	1.09218e-11	4.01999e-12	8.333e-11	2024.47	0.000224931	0.000435222	0.000426537	6.93043e-05	0.00031589	0.0855572	1.29451	0.00317897	0.086459	0.370835	4.52143e-06	0.00564323	0.016888	439.725	0.00172315
6.23208e-13	1.33302e-12	1.13745e-14	1.02578e-15	2.63274e-17	7.70482e-13	2.71974e-14	8.79966e-14	4.99024e-10	2.16223e-11	1.39384e-12	3.78926e-09	5.5655e-13	2.87564e-08	1.82023e-16	6.13565e-15	6.36885e-13	8.44929e-13	1.65103e-10	8.26885e-08	1.36154e-13	2.82444e-12	4.67338e-11	4.73408e-13	1.49453e-14	4.25949e-10	7.43158e-13	2.54338e-13	1.83084e-12	1.0846e-08	1.08626e-08	1.16147e-11	5.4427e-12	8.56114e-11	2057.55	0.000230198	0.000426407	0.000450233	4.22955e-05	0.000607984	0.0800118	1.38053	0.00306286	0.0693799	0.696345	5.66173e-06	0.00592621	0.0205472	353.112	0.001401
6.25136e-13	1.36998e-12	1.08478e-14	1.01927e-15	2.22659e-17	7.82348e-13	4.40954e-14	8.81149e-14	3.48776e-10	2.108e-11	1.4147e-12	3.28588e-09	5.6005e-13	3.31257e-08	1.71291e-16	6.41124e-15	6.93036e-13	7.87476e-13	1.47049e-10	7.83594e-08	2.12976e-13	3.13896e-12	4.48986e-11	4.63986e-13	1.61595e-14	4.25994e-10	7.28673e-13	2.79611e-13	1.48106e-12	1.1142e-08	1.11962e-08	1.12793e-11	4.07931e-12	8.74518e-11	1619.91	0.000228859	0.000450941	0.000359344	4.34504e-05	0.000930766	0.0822159	1.45164	0.0039621	0.0702045	0.722021	1.05307e-05	0.00503254	0.0144918	280.347	0.00180403
6.2549e-13	1.54272e-12	1.26528e-14	8.2982e-16	1.37344e-17	7.71522e-13	4.06828e-14	7.6877e-14	3.50229e-10	2.25012e-11	1.41726e-12	4.03675e-09	4.77742e-13	2.71601e-08	2.53686e-16	4.74884e-15	8.2876e-13	7.86329e-13	1.66943e-10	6.64326e-08	1.95019e-13	3.06496e-12	4.59238e-11	4.76353e-13	1.35366e-14	4.3867e-10	7.16049e-13	2.89678e-13	1.51944e-12	8.79247e-09	1.19613e-08	1.62309e-11	4.59609e-12	7.38696e-11	1955.01	0.000227899	0.000425851	0.000404613	4.38025e-05	0.000339139	0.104682	1.23253	0.00364688	0.041867	0.483957	6.8006e-06	0.00591585	0.0175091	442.034	0.00150079
6.2535e-13	1.28639e-12	1.06185e-14	9.85747e-16	2.44309e-17	7.87833e-13	3.44882e-14	7.49541e-14	3.34341e-10	2.16732e-11	1.44216e-12	3.78577e-09	5.81578e-13	3.09551e-08	1.79304e-16	6.47012e-15	7.61377e-13	7.895e-13	1.48453e-10	8.45337e-08	1.96964e-13	2.90261e-12	4.52437e-11	4.33996e-13	1.19224e-14	4.32142e-10	7.05027e-13	2.84007e-13	1.55089e-12	9.53713e-09	9.44486e-09	1.23099e-11	4.68921e-12	8.5849e-11	1921.67	0.000235446	0.000430788	0.000424853	4.69669e-05	0.000500702	0.0797104	1.55461	0.00338993	0.0723357	0.700818	6.63363e-06	0.00566852	0.015532	416.501	0.00164182
6.2535e-13	1.28639e-12	1.06185e-14	9.85747e-16	2.44309e-17	7.87833e-13	3.44882e-14	7.49541e-14	3.34341e-10	2.16732e-11	1.44216e-12	3.78577e-09	5.81578e-13	3.09551e-08	1.79304e-16	6.47012e-15	7.61377e-13	7.895e-13	1.48453e-10	8.45337e-08	1.96964e-13	2.90261e-12	4.52437e-11	4.33996e-13	1.19224e-14	4.32142e-10	7.05027e-13	2.84007e-13	1.55089e-12	9.53713e-09	9.44486e-09	1.23099e-11	4.68921e-12	8.5849e-11	1921.67	0.000235446	0.000430788	0.000424853	4.69669e-05	0.000500702	0.0797104	1.55461	0.00338993	0.0723357	0.700818	6.63363e-06	0.00566852	0.015532	416.501	0.00164182
6.2535e-13	1.28639e-12	1.06185e-14	9.85747e-16	2.44309e-17	7.87833e-13	3.44882e-14	7.49541e-14	3.34341e-10	2.16732e-11	1.44216e-12	3.78577e-09	5.81578e-13	3.09551e-08	1.79304e-16	6.47012e-15	7.61377e-13	7.895e-13	1.48453e-10	8.45337e-08	1.96964e-13	2.90261e-12	4.52437e-11	4.33996e-13	1.19224e-14	4.32142e-10	7.05027e-13	2.84007e-13	1.55089e-12	9.53713e-09	9.44486e-09	1.23099e-11	4.68921e-12	8.5849e-11	1921.67	0.000235446	0.000430788	0.000424853	4.69669e-05	0.000500702	0.0797104	1.55461	0.00338993	0.0723357	0.700818	6.63363e-06	0.00566852	0.015532	416.501	0.00164182
6.25145e-13	1.19756e-12	1.09655e-14	9.04474e-16	2.31231e-17	7.74647e-13	4.33716e-14	5.95338e-14	3.37069e-10	1.91155e-11	1.40697e-12	4.03121e-09	6.446e-13	2.71645e-08	1.12529e-16	7.10526e-15	8.27079e-13	8.54588e-13	1.40207e-10	9.48604e-08	1.53211e-13	3.56948e-12	4.7188e-11	4.85165e-13	1.2141e-14	3.70195e-10	7.58253e-13	2.55069e-13	1.48299e-12	9.9244e-09	9.40755e-09	1.03752e-11	4.62676e-12	9.90176e-11	1983.68	0.00023889	0.000444614	0.000434457	4.46619e-05	0.000409958	0.0526316	1.35807	0.00258965	0.0426712	0.558364	8.82144e-06	0.00649112	0.0129643	180.133	0.00151575
6.25193e-13	1.18281e-12	1.22505e-14	8.94592e-16	2.02025e-17	8.0224e-13	3.83935e-14	6.45976e-14	3.67831e-10	1.81479e-11	1.409e-12	3.67427e-09	5.33944e-13	2.52948e-08	1.65789e-16	6.61529e-15	6.70677e-13	8.25826e-13	1.54571e-10	9.865e-08	1.56725e-13	2.72329e-12	5.22808e-11	4.60343e-13	1.00993e-14	4.36353e-10	7.77101e-13	2.51031e-13	1.54222e-12	1.12841e-08	1.03804e-08	1.00063e-11	4.82686e-12	8.60081e-11	1848.94	0.000225627	0.000424571	0.00032924	4.72572e-05	0.000490159	0.0711406	1.85419	0.00362368	0.0758593	0.600506	7.13017e-06	0.00700727	0.0175175	592.398	0.00151186
6.2129e-13	1.46136e-12	1.20728e-14	7.67665e-16	2.50866e-17	7.44726e-13	3.56316e-14	6.91842e-14	2.87844e-10	2.2124e-11	1.38029e-12	4.1934e-09	5.95633e-13	3.72164e-08	1.57462e-16	6.8876e-15	6.76461e-13	7.93404e-13	1.2504e-10	8.50498e-08	1.96144e-13	2.92195e-12	5.53252e-11	4.00494e-13	1.08057e-14	4.3699e-10	7.05657e-13	2.40394e-13	1.52066e-12	8.8416e-09	8.8178e-09	1.72373e-11	4.58194e-12	8.57551e-11	2311.21	0.000228362	0.000448161	0.000451315	4.75251e-05	0.000404855	0.086924	1.30169	0.00370502	0.0761777	0.643972	7.40198e-06	0.00560892	0.0145409	447.369	0.00135689
6.21351e-13	1.35699e-12	1.11412e-14	1.07571e-15	2.83353e-17	8.74239e-13	2.74003e-14	7.9217e-14	4.19365e-10	2.06184e-11	1.38305e-12	4.38137e-09	6.92335e-13	2.9324e-08	1.8896e-16	6.44453e-15	5.91299e-13	8.39043e-13	1.4472e-10	9.95528e-08	2.16133e-13	2.81404e-12	4.20908e-11	4.69507e-13	1.25961e-14	3.62791e-10	7.88092e-13	2.48457e-13	1.58786e-12	9.99766e-09	1.01107e-08	1.31924e-11	4.80357e-12	7.8588e-11	1954.81	0.000231987	0.000452414	0.000413241	4.42583e-05	0.000649068	0.0711332	1.40322	0.00477329	0.0836575	0.575959	7.45275e-06	0.00617983	0.0199483	377.082	0.00150955
6.21336e-13	1.24956e-12	1.20199e-14	1.05614e-15	2.60429e-17	7.268e-13	3.84466e-14	8.23445e-14	3.38292e-10	2.60841e-11	1.38117e-12	3.4469e-09	5.56863e-13	2.9318e-08	1.2151e-16	6.37183e-15	7.07271e-13	8.34586e-13	1.25165e-10	8.39944e-08	9.12488e-14	2.99385e-12	4.22721e-11	4.69926e-13	1.65038e-14	4.63853e-10	7.80542e-13	2.55479e-13	1.66061e-12	9.65661e-09	1.08745e-08	1.21249e-11	5.00163e-12	9.04025e-11	1569.48	0.000223385	0.000444409	0.000359221	4.46412e-05	0.00058674	0.0774335	1.60911	0.00318307	0.0463057	0.703391	5.96291e-06	0.00510284	0.0179178	371.417	0.00156017
6.23631e-13	1.36073e-12	1.48847e-14	1.00762e-15	2.33224e-17	8.75328e-13	3.33474e-14	8.88222e-14	2.88193e-10	1.65822e-11	1.38898e-12	2.74944e-09	7.56802e-13	1.97076e-08	2.01243e-16	7.27691e-15	7.57013e-13	7.60431e-13	1.16646e-10	7.97337e-08	2.14556e-13	3.7004e-12	3.94137e-11	3.80162e-13	1.08084e-14	4.3302e-10	6.931e-13	2.79397e-13	1.51347e-12	9.22954e-09	1.03521e-08	1.17312e-11	5.52983e-12	9.35709e-11	2376.07	0.000227537	0.000426316	0.000406124	5.39883e-05	0.000600143	0.0750718	1.32488	0.00270495	0.0670593	0.633898	5.71694e-06	0.00718256	0.0138339	333.249	0.00119804
6.2528e-13	1.60252e-12	1.10883e-14	8.60302e-16	2.24887e-17	7.4863e-13	3.67359e-14	6.9591e-14	3.34055e-10	2.11714e-11	1.44059e-12	4.02674e-09	4.56563e-13	3.22279e-08	1.95278e-16	5.57728e-15	6.54573e-13	7.61002e-13	1.24694e-10	8.57423e-08	2.25055e-13	2.51956e-12	4.72923e-11	4.23102e-13	1.02976e-14	4.40487e-10	6.44479e-13	2.81839e-13	1.50885e-12	7.12441e-09	1.01123e-08	9.33816e-12	5.55879e-12	1.10905e-10	2832.08	0.000218801	0.00043546	0.000425772	4.19509e-05	0.000555211	0.0821411	0.977842	0.00327705	0.0539328	0.700745	7.21164e-06	0.00515976	0.0152657	305.56	0.00150658
6.25574e-13	1.46976e-12	2.02443e-14	8.57033e-16	2.13559e-17	7.84377e-13	3.43155e-14	7.45261e-14	3.61982e-10	1.53149e-11	1.3936e-12	5.12328e-09	5.5441e-13	3.40383e-08	2.72376e-16	6.77834e-15	7.66618e-13	8.47208e-13	1.37207e-10	7.89197e-08	2.1469e-13	3.48106e-12	4.599e-11	4.68711e-13	9.49479e-15	3.96944e-10	7.55651e-13	2.5223e-13	1.59327e-12	1.14008e-08	9.50838e-09	1.41901e-11	5.12185e-12	1.02253e-10	1675.04	0.000220938	0.000427064	0.000360107	5.86998e-05	0.000460302	0.102934	1.28118	0.00276768	0.0755767	0.831494	4.98574e-06	0.00562823	0.0161283	414.355	0.00140274
6.23129e-13	1.42461e-12	1.10428e-14	9.16466e-16	3.3795e-17	7.63419e-13	3.02104e-14	6.98381e-14	3.44648e-10	2.13351e-11	1.411e-12	4.16429e-09	5.45224e-13	3.73923e-08	1.70639e-16	6.86457e-15	8.59364e-13	7.32072e-13	1.53655e-10	8.08994e-08	1.90896e-13	2.92615e-12	4.5615e-11	3.88975e-13	1.26256e-14	4.36343e-10	6.68396e-13	2.58717e-13	1.2995e-12	9.44984e-09	9.18665e-09	1.38155e-11	5.15818e-12	7.42035e-11	2395.3	0.000223667	0.000423152	0.000383186	4.80432e-05	0.000408429	0.0729221	1.18168	0.00483268	0.078028	0.725933	6.06063e-06	0.00601724	0.0147065	634.289	0.00126073
6.247e-13	1.40158e-12	1.45845e-14	1.0984e-15	1.73395e-17	7.82894e-13	3.16489e-14	8.70424e-14	3.16487e-10	2.03893e-11	1.33015e-12	5.35631e-09	7.38509e-13	3.6166e-08	1.40204e-16	6.90354e-15	8.36405e-13	8.1498e-13	1.51528e-10	7.14558e-08	1.85887e-13	2.44894e-12	4.56632e-11	4.29093e-13	1.24221e-14	3.93554e-10	6.78218e-13	2.02299e-13	1.41889e-12	1.01445e-08	8.77479e-09	1.89357e-11	4.47061e-12	8.1669e-11	1994.52	0.000239771	0.000437566	0.000406748	3.43287e-05	0.000537006	0.105215	1.53384	0.0028924	0.0919908	0.682173	7.18439e-06	0.00585218	0.0164365	530.674	0.00164409
6.24923e-13	1.2696e-12	1.20919e-14	9.38347e-16	2.21444e-17	7.65712e-13	4.11631e-14	7.22676e-14	3.27494e-10	2.60495e-11	1.40579e-12	3.83221e-09	5.79568e-13	2.77965e-08	1.88894e-16	7.076e-15	7.17227e-13	7.84896e-13	1.6198e-10	8.00502e-08	2.27986e-13	3.26821e-12	4.66863e-11	4.36904e-13	9.97454e-15	4.29299e-10	6.89972e-13	2.49292e-13	1.28772e-12	9.84378e-09	9.86489e-09	1.10378e-11	3.85043e-12	7.35984e-11	2093.53	0.00021884	0.000430799	0.000529457	7.30489e-05	0.000533484	0.0867195	1.7498	0.0034529	0.0670375	0.753289	1.30063e-05	0.00487869	0.0150561	317.474	0.00176301
6.2535e-13	1.28639e-12	1.06185e-14	9.85747e-16	2.44309e-17	7.87833e-13	3.44882e-14	7.49541e-14	3.34341e-10	2.16732e-11	1.44216e-12	3.78577e-09	5.81578e-13	3.09551e-08	1.79304e-16	6.47012e-15	7.61377e-13	7.895e-13	1.48453e-10	8.45337e-08	1.96964e-13	2.90261e-12	4.52437e-11	4.33996e-13	1.19224e-14	4.32142e-10	7.05027e-13	2.84007e-13	1.55089e-12	9.53713e-09	9.44486e-09	1.23099e-11	4.68921e-12	8.5849e-11	1921.67	0.000235446	0.000430788	0.000424853	4.69669e-05	0.000500702	0.0797104	1.55461	0.00338993	0.0723357	0.700818	6.63363e-06	0.00566852	0.015532	416.501	0.00164182
6.21325e-13	1.30768e-12	1.2128e-14	8.65573e-16	2.45155e-17	8.07638e-13	3.86875e-14	5.70154e-14	3.3315e-10	1.9654e-11	1.35414e-12	3.70868e-09	6.28218e-13	3.38131e-08	2.23336e-16	6.59818e-15	7.17918e-13	8.26927e-13	1.50294e-10	9.98001e-08	2.39021e-13	3.41135e-12	5.07527e-11	4.50085e-13	1.11277e-14	6.05022e-10	7.34082e-13	2.11412e-13	1.56729e-12	1.12026e-08	8.77678e-09	1.62542e-11	4.26293e-12	1.02614e-10	1517.32	0.000235797	0.000451309	0.000460753	4.15381e-05	0.000531411	0.0853339	1.64504	0.00378736	0.0668603	0.489318	6.90048e-06	0.0067536	0.0162238	381.973	0.00140116
6.2128e-13	1.26285e-12	1.10449e-14	8.74086e-16	2.37765e-17	7.70024e-13	3.74719e-14	6.46028e-14	2.17076e-10	1.80812e-11	1.40626e-12	4.36596e-09	5.11389e-13	2.29102e-08	2.09557e-16	6.14195e-15	8.46784e-13	7.73345e-13	1.05915e-10	7.45897e-08	2.26094e-13	3.0663e-12	3.85803e-11	4.27898e-13	1.18475e-14	3.59521e-10	7.29661e-13	2.68028e-13	1.6392e-12	9.48953e-09	1.05977e-08	1.67124e-11	5.84079e-12	8.61375e-11	1674.85	0.000230505	0.000416426	0.00037834	5.40573e-05	0.00043145	0.0802193	1.63503	0.00320453	0.0553783	0.645562	6.28534e-06	0.00449876	0.0141356	428.876	0.00113071
6.25188e-13	1.44267e-12	1.19849e-14	1.02132e-15	2.84586e-17	7.98813e-13	3.282e-14	7.89094e-14	3.16256e-10	1.61597e-11	1.42355e-12	4.30798e-09	6.38006e-13	3.99298e-08	1.68744e-16	6.95034e-15	8.21909e-13	7.66798e-13	1.70599e-10	7.22303e-08	1.97392e-13	3.43795e-12	5.47811e-11	4.44566e-13	1.14986e-14	4.88109e-10	6.80487e-13	2.72859e-13	1.517e-12	1.02262e-08	9.08994e-09	1.43889e-11	4.48624e-12	8.50045e-11	1890.29	0.000224534	0.000443635	0.000175659	4.48183e-05	0.00055211	0.080088	1.27642	0.00351062	0.0817348	0.763872	3.82104e-06	0.00541934	0.0154224	437.19	0.00163023
6.25594e-13	1.30338e-12	1.15868e-14	1.13917e-15	2.38953e-17	7.28391e-13	3.80767e-14	6.95581e-14	2.44188e-10	2.52226e-11	1.44966e-12	3.85622e-09	5.83552e-13	3.28421e-08	1.26188e-16	6.36597e-15	8.48647e-13	8.01559e-13	1.82412e-10	8.73488e-08	1.45547e-13	3.44093e-12	4.88802e-11	4.30482e-13	1.50553e-14	4.23951e-10	7.55906e-13	2.85794e-13	1.3549e-12	1.03555e-08	1.05354e-08	1.24079e-11	4.28401e-12	7.1081e-11	1935.58	0.000239364	0.000479076	0.000531077	5.34299e-05	0.000598872	0.0848951	1.58282	0.0027969	0.0661706	0.633381	6.66182e-06	0.0056221	0.0170261	381.17	0.00172083
6.24593e-13	1.39445e-12	1.23666e-14	1.00299e-15	2.72643e-17	8.13664e-13	4.10626e-14	5.94999e-14	3.456e-10	1.90115e-11	1.4135e-12	3.52347e-09	5.7593e-13	3.30638e-08	1.70585e-16	5.8428e-15	7.58135e-13	8.11052e-13	1.3776e-10	8.24695e-08	2.396e-13	2.65958e-12	4.60069e-11	4.45146e-13	1.18189e-14	4.65518e-10	7.25065e-13	2.51083e-13	1.65473e-12	7.95072e-09	8.85615e-09	1.22934e-11	5.12067e-12	8.23013e-11	1969.36	0.000227296	0.000421788	0.000436708	4.84362e-05	0.000211516	0.10526	1.55769	0.00397836	0.0826633	0.618018	6.96559e-06	0.00520999	0.0162838	263.206	0.00171482
6.21317e-13	1.33727e-12	1.59799e-14	1.06091e-15	2.23904e-17	7.93928e-13	3.46274e-14	8.1303e-14	3.58569e-10	1.93423e-11	1.37529e-12	3.02683e-09	4.18664e-13	3.05503e-08	2.05747e-16	6.48654e-15	7.40308e-13	8.05273e-13	1.76106e-10	7.9787e-08	1.77971e-13	3.38429e-12	4.20563e-11	4.48613e-13	1.28329e-14	4.10334e-10	7.29884e-13	2.63947e-13	1.44002e-12	9.40756e-09	9.12745e-09	2.57334e-11	4.77116e-12	8.36129e-11	1774.93	0.000217908	0.000451031	0.000498553	5.07183e-05	0.000590181	0.0825817	1.53426	0.00311648	0.0646864	0.589265	7.73937e-06	0.00554573	0.0146985	403.735	0.0013465
6.25619e-13	1.29873e-12	1.61727e-14	1.27359e-15	2.25255e-17	7.46673e-13	3.05019e-14	9.17615e-14	3.29563e-10	1.95821e-11	1.3868e-12	3.96743e-09	5.04368e-13	2.44212e-08	1.66556e-16	7.32428e-15	8.46264e-13	9.29807e-13	1.28347e-10	5.71297e-08	1.86651e-13	3.33321e-12	4.81924e-11	4.21598e-13	1.14419e-14	3.66666e-10	7.5287e-13	2.71746e-13	1.32899e-12	1.06389e-08	9.87771e-09	1.27395e-11	4.28083e-12	1.02307e-10	2188.01	0.000230917	0.000439432	0.00042951	5.80329e-05	0.000454575	0.102663	2.1296	0.00329439	0.0919155	0.419569	7.58296e-06	0.00624613	0.0164929	361.751	0.00195437
6.25364e-13	1.2563e-12	1.19928e-14	8.88719e-16	2.04615e-17	7.65138e-13	3.7853e-14	8.37479e-14	3.49001e-10	1.93074e-11	1.38346e-12	3.04253e-09	6.32682e-13	2.84847e-08	1.41641e-16	6.55743e-15	9.00583e-13	8.86351e-13	1.73242e-10	9.55315e-08	2.01924e-13	2.97311e-12	4.32506e-11	5.01069e-13	1.10487e-14	4.26989e-10	8.1843e-13	2.48339e-13	1.82562e-12	8.75994e-09	9.63714e-09	1.22089e-11	5.15521e-12	8.13071e-11	1786.17	0.000238512	0.000458491	0.000413861	4.06807e-05	0.00060617	0.0844894	1.80964	0.00366611	0.0658951	0.569773	8.73555e-06	0.00574186	0.016878	384.452	0.001798
6.23928e-13	1.22885e-12	1.18072e-14	9.48504e-16	2.23768e-17	7.98619e-13	3.11442e-14	7.53158e-14	3.22081e-10	2.28061e-11	1.34389e-12	3.79332e-09	5.75972e-13	2.67072e-08	1.89435e-16	5.64259e-15	8.19841e-13	8.77767e-13	1.61526e-10	8.08286e-08	2.10851e-13	3.0045e-12	4.49031e-11	4.50424e-13	1.1931e-14	4.68697e-10	7.64612e-13	1.89051e-13	1.35688e-12	9.85337e-09	9.02933e-09	1.10362e-11	4.67853e-12	8.57137e-11	1717.13	0.000244008	0.000436514	0.000395153	5.45004e-05	0.000607291	0.0638863	1.53044	0.0032199	0.056132	0.690816	6.59342e-06	0.00576399	0.0157964	408.42	0.00183778
6.22915e-13	1.23939e-12	1.09734e-14	8.73518e-16	2.37917e-17	8.23444e-13	3.4902e-14	7.68006e-14	4.14657e-10	2.00956e-11	1.34946e-12	3.2768e-09	5.48691e-13	2.61185e-08	1.4294e-16	7.00393e-15	6.18483e-13	8.58155e-13	1.50905e-10	8.43275e-08	2.93958e-13	3.13308e-12	5.3518e-11	4.44641e-13	1.13563e-14	3.8941e-10	6.95876e-13	2.24154e-13	1.36943e-12	6.34789e-09	8.22218e-09	1.26309e-11	4.67687e-12	1.20885e-10	1544.27	0.000214034	0.000444219	0.00048556	3.50082e-05	0.000523941	0.0794181	1.74264	0.00355554	0.0670633	0.526599	7.66376e-06	0.00580239	0.0183721	375.014	0.00141839
6.2347e-13	1.31121e-12	1.093e-14	1.05488e-15	2.32705e-17	7.61654e-13	3.3674e-14	7.59942e-14	3.53679e-10	2.02974e-11	1.31849e-12	3.26663e-09	6.33621e-13	2.81313e-08	1.651e-16	7.07968e-15	6.39304e-13	8.37606e-13	1.27735e-10	8.70886e-08	2.15048e-13	2.81651e-12	4.32466e-11	4.83106e-13	1.07257e-14	5.07721e-10	7.27351e-13	1.9007e-13	1.50846e-12	1.45543e-08	1.00028e-08	1.17817e-11	5.11998e-12	1.05079e-10	1593.84	0.000232607	0.000454664	0.000457885	4.77917e-05	0.000437324	0.0857254	1.63565	0.00322118	0.0718606	0.543243	5.68732e-06	0.00656072	0.0138295	373.963	0.00139895
6.25441e-13	1.22097e-12	1.22426e-14	9.77935e-16	3.07419e-17	7.51366e-13	3.5654e-14	8.4872e-14	3.22652e-10	2.12529e-11	1.33177e-12	4.18444e-09	5.40315e-13	2.68928e-08	1.7215e-16	7.50737e-15	7.24702e-13	8.06373e-13	1.37117e-10	5.54936e-08	2.17907e-13	3.22946e-12	3.86422e-11	4.08466e-13	1.23727e-14	3.47101e-10	6.72503e-13	2.06055e-13	1.44177e-12	9.01406e-09	9.36013e-09	1.3149e-11	4.93481e-12	6.59739e-11	1909.08	0.000232163	0.000449996	0.000395635	3.95751e-05	0.000517884	0.0655028	1.49419	0.0038876	0.0599232	0.591011	6.36387e-06	0.00575474	0.0151361	458.005	0.00146705
6.25068e-13	1.28749e-12	1.25531e-14	1.10648e-15	2.55551e-17	8.65701e-13	3.95495e-14	7.79837e-14	2.76581e-10	1.71777e-11	1.39679e-12	4.53834e-09	5.21178e-13	3.03636e-08	2.09659e-16	5.845e-15	6.95066e-13	7.83567e-13	1.54744e-10	6.53519e-08	2.13754e-13	3.01276e-12	4.89631e-11	4.27052e-13	1.28971e-14	4.26297e-10	7.06173e-13	2.65461e-13	1.52756e-12	7.7038e-09	9.00342e-09	1.20462e-11	4.59575e-12	7.27221e-11	2124.42	0.000222863	0.000430871	0.000314783	4.39914e-05	0.000598114	0.075777	1.46746	0.00438239	0.0729822	0.624459	6.69857e-06	0.00725372	0.0138717	448.253	0.00156448
6.24259e-13	1.41824e-12	1.50282e-14	1.0934e-15	3.52583e-17	7.79752e-13	3.0402e-14	6.65998e-14	3.04978e-10	2.54482e-11	1.40837e-12	3.36749e-09	6.50714e-13	2.67595e-08	1.8207e-16	6.04999e-15	7.16529e-13	7.77434e-13	1.51737e-10	8.28672e-08	1.666e-13	2.44534e-12	4.43077e-11	3.99837e-13	1.13924e-14	4.03398e-10	7.02484e-13	2.51443e-13	1.51488e-12	5.61887e-09	9.25658e-09	1.18618e-11	5.11852e-12	8.14566e-11	1902.98	0.000233058	0.000439512	0.000356632	4.69376e-05	0.000458611	0.0834659	1.21103	0.0025889	0.0719869	0.756986	5.58166e-06	0.00634477	0.0198473	369.339	0.0014512
6.21297e-13	1.17157e-12	1.09722e-14	9.26518e-16	2.51428e-17	8.16594e-13	3.22431e-14	4.8493e-14	3.31487e-10	2.14806e-11	1.42199e-12	2.82473e-09	4.97977e-13	2.52024e-08	1.75288e-16	5.38835e-15	6.56237e-13	8.31886e-13	1.87945e-10	8.3264e-08	2.62115e-13	2.66538e-12	4.88597e-11	4.89765e-13	1.04167e-14	4.2596e-10	7.49664e-13	2.64862e-13	1.22662e-12	1.03332e-08	9.27196e-09	1.42427e-11	3.576e-12	8.24541e-11	1916.57	0.000233315	0.000445553	0.000502751	4.44794e-05	0.000499261	0.0668003	1.76569	0.00364097	0.0718162	0.531216	6.03487e-06	0.00592323	0.0155609	433.139	0.00116254
6.25422e-13	1.422e-12	1.09434e-14	9.2958e-16	2.71212e-17	8.36576e-13	3.29331e-14	8.81489e-14	3.32096e-10	2.13222e-11	1.33484e-12	3.59702e-09	5.50706e-13	3.15083e-08	1.87234e-16	6.64758e-15	1.04184e-12	8.06261e-13	1.46812e-10	7.73434e-08	1.3621e-13	2.9628e-12	4.04249e-11	4.13839e-13	1.03774e-14	4.82483e-10	7.32007e-13	1.97631e-13	1.33662e-12	8.37475e-09	1.12141e-08	1.19438e-11	4.10177e-12	8.93292e-11	1735.1	0.000239066	0.000437119	0.000346135	5.48635e-05	0.000414369	0.0843799	1.27703	0.00280839	0.0664106	0.622456	5.86381e-06	0.00746379	0.0155919	481.348	0.00163742
6.25409e-13	1.43184e-12	1.25058e-14	8.63182e-16	1.83536e-17	7.5183e-13	2.81993e-14	6.96371e-14	3.1607e-10	2.11883e-11	1.3862e-12	4.12901e-09	4.12797e-13	3.81388e-08	1.47826e-16	5.04845e-15	7.68013e-13	7.24774e-13	9.59073e-11	8.94728e-08	2.29381e-13	2.64323e-12	5.16916e-11	4.25867e-13	1.09309e-14	5.65688e-10	6.86092e-13	2.24879e-13	1.14475e-12	1.1342e-08	8.50404e-09	1.10845e-11	5.29041e-12	1.02078e-10	2024.07	0.000215878	0.000430235	0.000285353	6.46571e-05	0.000204837	0.0718847	1.11621	0.00329941	0.0753158	0.699812	7.35958e-06	0.00494761	0.0222518	439.278	0.00150724
6.25556e-13	1.41979e-12	1.25756e-14	1.06777e-15	2.49702e-17	7.82616e-13	3.22664e-14	7.91411e-14	3.27417e-10	2.15531e-11	1.4122e-12	3.55545e-09	5.5716e-13	2.47185e-08	1.69096e-16	6.41689e-15	7.41764e-13	7.2869e-13	1.17881e-10	7.27741e-08	1.64334e-13	3.09232e-12	4.05353e-11	3.81068e-13	1.17184e-14	4.36217e-10	6.475e-13	2.85681e-13	1.37182e-12	9.89291e-09	1.0462e-08	1.26419e-11	5.15928e-12	8.84341e-11	1802.81	0.000222653	0.000420635	0.000429951	4.74449e-05	0.00051899	0.0859741	1.25008	0.00370735	0.0785641	0.416225	5.32124e-06	0.00665461	0.0170496	470.917	0.00159053
6.24413e-13	1.41211e-12	1.19907e-14	9.58952e-16	2.51036e-17	7.46672e-13	4.07981e-14	7.47488e-14	3.33758e-10	2.24072e-11	1.40545e-12	3.66433e-09	6.03553e-13	1.72923e-08	1.9899e-16	6.14104e-15	9.00757e-13	7.06373e-13	1.65238e-10	8.05027e-08	1.91903e-13	3.61078e-12	4.06245e-11	4.15182e-13	1.47527e-14	4.6816e-10	6.83476e-13	2.73352e-13	1.25252e-12	9.04335e-09	8.28636e-09	1.64787e-11	3.38007e-12	1.02693e-10	1481.52	0.000218242	0.000447616	0.00035576	4.96446e-05	0.00029262	0.0978956	1.40806	0.00361874	0.0802266	0.548513	3.44186e-06	0.0054519	0.0139216	468.607	0.00163726
6.2535e-13	1.28639e-12	1.06185e-14	9.85747e-16	2.44309e-17	7.87833e-13	3.44882e-14	7.49541e-14	3.34341e-10	2.16732e-11	1.44216e-12	3.78577e-09	5.81578e-13	3.09551e-08	1.79304e-16	6.47012e-15	7.61377e-13	7.895e-13	1.48453e-10	8.45337e-08	1.96964e-13	2.90261e-12	4.52437e-11	4.33996e-13	1.19224e-14	4.32142e-10	7.05027e-13	2.84007e-13	1.55089e-12	9.53713e-09	9.44486e-09	1.23099e-11	4.68921e-12	8.5849e-11	1921.67	0.000235446	0.000430788	0.000424853	4.69669e-05	0.000500702	0.0797104	1.55461	0.00338993	0.0723357	0.700818	6.63363e-06	0.00566852	0.015532	416.501	0.00164182
6.24686e-13	1.40424e-12	1.20017e-14	1.03412e-15	2.49634e-17	8.15738e-13	4.86758e-14	7.28418e-14	3.25836e-10	2.09218e-11	1.42548e-12	3.73464e-09	4.72498e-13	2.74092e-08	1.875e-16	6.62177e-15	6.73769e-13	8.37668e-13	1.46293e-10	9.76061e-08	2.45358e-13	3.71113e-12	5.43073e-11	4.9111e-13	1.20597e-14	3.09172e-10	7.31346e-13	2.75394e-13	1.74349e-12	8.39462e-09	9.29965e-09	1.45594e-11	5.0582e-12	1.54869e-10	1775.41	0.000225513	0.000467899	0.000303487	4.32141e-05	0.000529253	0.0939257	1.4448	0.00175793	0.0896577	0.77228	5.52365e-06	0.00609933	0.01467	389.904	0.00188516
6.2535e-13	1.28639e-12	1.06185e-14	9.85747e-16	2.44309e-17	7.87833e-13	3.44882e-14	7.49541e-14	3.34341e-10	2.16732e-11	1.44216e-12	3.78577e-09	5.81578e-13	3.09551e-08	1.79304e-16	6.47012e-15	7.61377e-13	7.895e-13	1.48453e-10	8.45337e-08	1.96964e-13	2.90261e-12	4.52437e-11	4.33996e-13	1.19224e-14	4.32142e-10	7.05027e-13	2.84007e-13	1.55089e-12	9.53713e-09	9.44486e-09	1.23099e-11	4.68921e-12	8.5849e-11	1921.67	0.000235446	0.000430788	0.000424853	4.69669e-05	0.000500702	0.0797104	1.55461	0.00338993	0.0723357	0.700818	6.63363e-06	0.00566852	0.015532	416.501	0.00164182
6.24626e-13	1.34061e-12	1.16964e-14	1.06857e-15	3.05198e-17	8.70584e-13	3.62311e-14	8.17519e-14	3.17944e-10	1.77216e-11	1.42926e-12	4.29537e-09	5.3652e-13	3.57925e-08	1.78689e-16	5.84641e-15	7.11365e-13	7.8564e-13	1.39604e-10	6.78683e-08	1.77138e-13	2.58258e-12	4.54339e-11	4.30748e-13	1.42057e-14	4.57952e-10	6.86741e-13	2.91835e-13	1.568e-12	9.50795e-09	9.38591e-09	1.37607e-11	4.6967e-12	8.61951e-11	1524.44	0.000223332	0.000419963	0.000309591	4.2139e-05	0.000603723	0.0629885	1.21788	0.00238908	0.0617382	0.709833	6.02137e-06	0.0067494	0.0162533	444.883	0.00149898
6.2535e-13	1.28639e-12	1.06185e-14	9.85747e-16	2.44309e-17	7.87833e-13	3.44882e-14	7.49541e-14	3.34341e-10	2.16732e-11	1.44216e-12	3.78577e-09	5.81578e-13	3.09551e-08	1.79304e-16	6.47012e-15	7.61377e-13	7.895e-13	1.48453e-10	8.45337e-08	1.96964e-13	2.90261e-12	4.52437e-11	4.33996e-13	1.19224e-14	4.32142e-10	7.05027e-13	2.84007e-13	1.55089e-12	9.53713e-09	9.44486e-09	1.23099e-11	4.68921e-12	8.5849e-11	1921.67	0.000235446	0.000430788	0.000424853	4.69669e-05	0.000500702	0.0797104	1.55461	0.00338993	0.0723357	0.700818	6.63363e-06	0.00566852	0.015532	416.501	0.00164182
6.2535e-13	1.28639e-12	1.06185e-14	9.85747e-16	2.44309e-17	7.87833e-13	3.44882e-14	7.49541e-14	3.34341e-10	2.16732e-11	1.44216e-12	3.78577e-09	5.81578e-13	3.09551e-08	1.79304e-16	6.47012e-15	7.61377e-13	7.895e-13	1.48453e-10	8.45337e-08	1.96964e-13	2.90261e-12	4.52437e-11	4.33996e-13	1.19224e-14	4.32142e-10	7.05027e-13	2.84007e-13	1.55089e-12	9.53713e-09	9.44486e-09	1.23099e-11	4.68921e-12	8.5849e-11	1921.67	0.000235446	0.000430788	0.000424853	4.69669e-05	0.000500702	0.0797104	1.55461	0.00338993	0.0723357	0.700818	6.63363e-06	0.00566852	0.015532	416.501	0.00164182
6.23819e-13	1.26689e-12	1.61466e-14	8.97729e-16	2.5742e-17	8.18902e-13	3.78662e-14	6.71736e-14	3.00212e-10	2.13792e-11	1.41198e-12	3.75412e-09	5.1776e-13	2.83297e-08	1.95228e-16	6.97946e-15	8.15015e-13	8.45808e-13	1.48603e-10	7.51157e-08	2.25913e-13	3.59285e-12	4.62879e-11	4.76394e-13	1.55924e-14	4.13207e-10	7.06304e-13	2.72191e-13	1.44515e-12	9.62538e-09	9.43519e-09	1.10737e-11	4.27576e-12	1.30017e-10	1498.58	0.000229543	0.000443431	0.000382518	5.58751e-05	0.000755782	0.0744859	1.56582	0.00291094	0.0315688	0.606177	6.17897e-06	0.0067486	0.0181379	659.319	0.00160335
6.2535e-13	1.28639e-12	1.06185e-14	9.85747e-16	2.44309e-17	7.87833e-13	3.44882e-14	7.49541e-14	3.34341e-10	2.16732e-11	1.44216e-12	3.78577e-09	5.81578e-13	3.09551e-08	1.79304e-16	6.47012e-15	7.61377e-13	7.895e-13	1.48453e-10	8.45337e-08	1.96964e-13	2.90261e-12	4.52437e-11	4.33996e-13	1.19224e-14	4.32142e-10	7.05027e-13	2.84007e-13	1.55089e-12	9.53713e-09	9.44486e-09	1.23099e-11	4.68921e-12	8.5849e-11	1921.67	0.000235446	0.000430788	0.000424853	4.69669e-05	0.000500702	0.0797104	1.55461	0.00338993	0.0723357	0.700818	6.63363e-06	0.00566852	0.015532	416.501	0.00164182
6.24709e-13	1.32865e-12	1.17492e-14	9.32954e-16	3.26896e-17	7.77748e-13	3.84377e-14	6.24586e-14	3.50175e-10	2.23293e-11	1.41493e-12	3.74527e-09	5.67347e-13	4.37451e-08	1.92211e-16	7.32014e-15	7.89158e-13	8.01013e-13	1.55022e-10	7.38837e-08	1.94221e-13	3.22717e-12	3.79103e-11	4.25733e-13	9.86554e-15	4.79895e-10	7.37889e-13	2.49524e-13	1.33559e-12	6.8646e-09	1.01624e-08	1.54696e-11	5.07978e-12	9.4416e-11	2379.45	0.000231176	0.000453201	0.0004357	5.12144e-05	0.000567166	0.0768743	1.41164	0.00335483	0.0670054	0.667788	7.12895e-06	0.00555037	0.0200873	427.359	0.00174583
6.25401e-13	1.34076e-12	1.0661e-14	1.0298e-15	3.39677e-17	8.79975e-13	3.96689e-14	6.82483e-14	3.08674e-10	2.40397e-11	1.3691e-12	5.64192e-09	6.08468e-13	2.97932e-08	2.37988e-16	5.80326e-15	6.99584e-13	9.07911e-13	1.54217e-10	9.57259e-08	1.91848e-13	2.85971e-12	5.1055e-11	4.71159e-13	1.50703e-14	4.95957e-10	8.24719e-13	2.1493e-13	1.49231e-12	9.30203e-09	9.81737e-09	1.52306e-11	5.30323e-12	9.40535e-11	1850.88	0.000235656	0.000423732	0.000311436	4.36303e-05	0.000632457	0.0964107	1.68924	0.00359808	0.0823265	0.57045	6.49377e-06	0.00749497	0.0144509	352.616	0.0017767
6.24166e-13	1.2211e-12	1.20894e-14	1.0154e-15	3.45833e-17	7.65395e-13	3.30667e-14	5.77275e-14	3.72779e-10	2.48724e-11	1.44897e-12	3.87723e-09	5.15974e-13	2.67282e-08	3.15505e-16	5.63117e-15	9.298e-13	7.64138e-13	1.15636e-10	9.27691e-08	2.17241e-13	2.95141e-12	4.3532e-11	4.1832e-13	1.24323e-14	5.61313e-10	6.78006e-13	2.70195e-13	1.69197e-12	6.61809e-09	9.53389e-09	1.06528e-11	5.17771e-12	7.45901e-11	2163.31	0.000242865	0.000446673	0.00039015	5.29692e-05	0.000537607	0.0779157	1.74022	0.0019023	0.0854083	0.662866	9.2656e-06	0.00530431	0.018067	347.093	0.00184049
6.25386e-13	1.2925e-12	1.10823e-14	9.96292e-16	1.80268e-17	8.43043e-13	3.48323e-14	6.79109e-14	3.97262e-10	1.69572e-11	1.41498e-12	5.35184e-09	8.05305e-13	3.27306e-08	1.52341e-16	7.78129e-15	7.52333e-13	7.71039e-13	1.45116e-10	8.94857e-08	2.23203e-13	3.29378e-12	4.95329e-11	4.40471e-13	1.10649e-14	4.08284e-10	6.99768e-13	2.59897e-13	1.43304e-12	7.71898e-09	8.57113e-09	1.93526e-11	4.40848e-12	9.33654e-11	1940.59	0.000223265	0.000415103	0.000489726	3.70387e-05	0.000387323	0.0708127	1.45186	0.00325237	0.084992	0.473997	4.81362e-06	0.00755979	0.0174631	430.046	0.00176997
6.25016e-13	1.30256e-12	1.25524e-14	9.70695e-16	2.3487e-17	7.63483e-13	3.31958e-14	6.7022e-14	2.6274e-10	2.50491e-11	1.36088e-12	2.13612e-09	5.21229e-13	2.7154e-08	8.94182e-17	6.01217e-15	9.03021e-13	7.78887e-13	1.41072e-10	8.0766e-08	1.78223e-13	2.98417e-12	5.57775e-11	4.03479e-13	1.23534e-14	3.64113e-10	6.76391e-13	1.95765e-13	1.41185e-12	1.75983e-08	1.0831e-08	1.75373e-11	4.96333e-12	8.98928e-11	2075.63	0.000235202	0.000465955	0.000440158	5.29092e-05	0.000485452	0.0876174	1.65964	0.0035815	0.089746	0.654143	5.59859e-06	0.00605201	0.0131223	482.795	0.00179677
6.24295e-13	1.32307e-12	1.15688e-14	1.01219e-15	2.78097e-17	7.41923e-13	3.77102e-14	6.98514e-14	2.95564e-10	2.26675e-11	1.37953e-12	3.73846e-09	5.73817e-13	2.67292e-08	1.47099e-16	6.38241e-15	7.90617e-13	7.52855e-13	1.29012e-10	7.96418e-08	2.02459e-13	3.01104e-12	4.29911e-11	4.32435e-13	1.1241e-14	3.98594e-10	7.00288e-13	2.30053e-13	1.30707e-12	9.26381e-09	9.52219e-09	1.12647e-11	4.19926e-12	1.00118e-10	7659.08	0.000222139	0.000432676	0.000514486	4.63242e-05	0.000386318	0.0674667	1.22986	0.00332851	0.0763476	0.616053	5.32131e-06	0.00450818	0.0153265	426.016	0.00166597
6.25002e-13	1.46211e-12	1.15022e-14	9.30729e-16	2.54285e-17	7.59093e-13	3.36069e-14	9.51116e-14	3.74861e-10	2.04003e-11	1.43706e-12	3.4148e-09	5.09405e-13	3.04176e-08	2.18196e-16	5.25469e-15	7.66486e-13	7.96044e-13	1.20828e-10	7.42033e-08	2.68465e-13	2.84e-12	3.94516e-11	4.50494e-13	1.11969e-14	4.8817e-10	7.25004e-13	3.01977e-13	1.34967e-12	8.11354e-09	9.4046e-09	1.57164e-11	4.44024e-12	8.70944e-11	2350.12	0.000231284	0.000443007	0.000380901	3.66992e-05	0.000586917	0.0816512	1.1862	0.00432455	0.0610873	0.655685	7.29628e-06	0.00531702	0.0156655	340.019	0.00183005
6.23575e-13	1.5871e-12	1.04747e-14	1.06437e-15	3.53836e-17	7.82479e-13	3.848e-14	6.10258e-14	3.11731e-10	1.86821e-11	1.38747e-12	4.04424e-09	4.63154e-13	2.68668e-08	1.73506e-16	6.20628e-15	6.77455e-13	8.29116e-13	1.58867e-10	7.68607e-08	1.99753e-13	2.76383e-12	4.06651e-11	4.3336e-13	9.6776e-15	4.12733e-10	7.2775e-13	2.47989e-13	1.33123e-12	1.02997e-08	8.80415e-09	1.22417e-11	4.47442e-12	8.70887e-11	1631.18	0.000241208	0.000436618	0.000359453	3.93082e-05	0.00172068	0.109827	1.18472	0.0024089	0.0762476	0.316556	7.88432e-06	0.00634597	0.0138313	404.926	0.00165217
6.25493e-13	1.23886e-12	1.26814e-14	8.61813e-16	3.62724e-17	8.82922e-13	3.17343e-14	4.82557e-14	3.74527e-10	2.20314e-11	1.42873e-12	5.92745e-09	5.20161e-13	3.05048e-08	1.68187e-16	6.04954e-15	9.40219e-13	8.80173e-13	1.48919e-10	9.21462e-08	2.35041e-13	2.75615e-12	4.20331e-11	4.59584e-13	9.29853e-15	2.98527e-10	7.94301e-13	2.45461e-13	1.63911e-12	9.5219e-09	1.02704e-08	1.2655e-11	5.34784e-12	1.0029e-10	1853.56	0.000230645	0.000451711	0.000453847	4.68558e-05	0.000409165	0.0785861	1.62172	0.00208873	0.0768042	0.701598	6.45969e-06	0.00927671	0.0191661	379.581	0.00149891
6.24716e-13	1.44451e-12	1.55689e-14	9.82902e-16	2.37199e-17	7.88145e-13	4.67961e-14	6.20536e-14	3.27056e-10	2.24888e-11	1.28896e-12	5.57287e-09	5.82102e-13	2.93615e-08	9.90561e-17	7.17184e-15	7.87611e-13	9.08713e-13	1.29112e-10	8.71799e-08	1.84831e-13	3.04939e-12	4.92242e-11	4.60032e-13	1.18419e-14	5.40823e-10	7.35933e-13	1.42375e-13	1.27712e-12	8.98654e-09	8.38571e-09	1.23708e-11	3.96636e-12	8.74253e-11	1758.23	0.000235565	0.000435657	0.000514692	4.85432e-05	0.000391814	0.0928306	1.34972	0.00419779	0.0723105	0.680644	5.05384e-06	0.00596369	0.0134105	582.07	0.00170368
6.25819e-13	1.20559e-12	1.21767e-14	1.00934e-15	2.49442e-17	7.46353e-13	3.71453e-14	5.91133e-14	3.80412e-10	2.14792e-11	1.42576e-12	4.00446e-09	6.18647e-13	3.09176e-08	1.97287e-16	6.72465e-15	7.08629e-13	7.53205e-13	1.7525e-10	8.66949e-08	1.4418e-13	3.13124e-12	4.24994e-11	4.42268e-13	1.21604e-14	4.23281e-10	6.96865e-13	2.7875e-13	1.42473e-12	9.33098e-09	9.59939e-09	1.32666e-11	4.60363e-12	1.04453e-10	1898.69	0.000227514	0.000439142	0.000374966	5.57599e-05	0.000200335	0.0793059	1.83823	0.00325089	0.0418073	0.339691	5.64925e-06	0.00613021	0.0160235	407.605	0.00156848
6.22493e-13	1.19686e-12	1.13574e-14	1.04252e-15	3.28475e-17	7.44536e-13	4.67994e-14	5.64889e-14	3.2729e-10	3.03399e-11	1.38824e-12	5.43447e-09	4.66659e-13	3.64025e-08	1.17875e-16	7.44782e-15	8.00891e-13	8.10869e-13	1.08755e-10	9.19046e-08	1.04074e-13	4.12688e-12	4.26522e-11	4.70828e-13	1.15187e-14	4.14273e-10	7.34212e-13	2.38502e-13	1.40921e-12	9.19091e-09	1.28898e-08	1.08144e-11	4.23068e-12	8.86483e-11	2400.93	0.000220523	0.000437671	0.00061271	3.8991e-05	0.000244805	0.0827716	1.98388	0.00253344	0.0821983	0.888806	8.70742e-06	0.00397048	0.0210303	527.528	0.00112039
6.24528e-13	1.41374e-12	1.21091e-14	1.07778e-15	2.62282e-17	7.95418e-13	3.58542e-14	6.17326e-14	2.62056e-10	2.04378e-11	1.4294e-12	3.52802e-09	5.61488e-13	3.68835e-08	1.60612e-16	6.7048e-15	6.74642e-13	8.3062e-13	1.64639e-10	7.31173e-08	1.96653e-13	2.74331e-12	5.40345e-11	4.91993e-13	1.20639e-14	3.91465e-10	7.37859e-13	2.59977e-13	1.55042e-12	9.35844e-09	9.10869e-09	1.23615e-11	4.8625e-12	8.00791e-11	2065.31	0.000229653	0.000457933	0.000412568	3.91205e-05	0.000494367	0.090213	1.49571	0.00313074	0.0859845	0.767576	7.41673e-06	0.00616415	0.013955	408.407	0.00163211
6.24421e-13	1.27629e-12	1.14548e-14	8.07737e-16	2.75764e-17	7.52453e-13	3.94062e-14	6.37654e-14	2.96119e-10	1.88825e-11	1.39008e-12	4.93855e-09	5.07909e-13	2.21472e-08	1.56761e-16	6.10617e-15	7.68983e-13	7.41842e-13	1.31494e-10	8.25687e-08	1.27086e-13	2.14008e-12	5.18893e-11	4.1776e-13	1.04297e-14	4.19896e-10	7.29062e-13	2.35322e-13	1.70703e-12	9.53278e-09	7.78475e-09	1.22995e-11	5.99302e-12	8.11165e-11	2283.52	0.000219453	0.000425248	0.000342391	4.53562e-05	0.000650084	0.066274	1.47556	0.00282784	0.0471172	0.700185	6.08211e-06	0.00540907	0.0158923	297.543	0.00134836
6.25276e-13	1.2933e-12	1.0735e-14	7.6581e-16	2.92413e-17	7.83004e-13	4.13782e-14	6.77266e-14	2.43684e-10	2.58183e-11	1.38877e-12	3.79755e-09	7.08813e-13	3.51061e-08	1.77571e-16	8.58273e-15	7.50893e-13	8.37167e-13	1.702e-10	9.20481e-08	2.14891e-13	3.35128e-12	4.46402e-11	4.68751e-13	1.14391e-14	2.93889e-10	7.40883e-13	2.26048e-13	1.47889e-12	1.06341e-08	9.39264e-09	1.10578e-11	4.65207e-12	1.0039e-10	1735.48	0.000219818	0.000439826	0.000423249	4.50272e-05	0.000534399	0.0805825	1.54604	0.00391671	0.063004	0.758355	1.15987e-05	0.00553256	0.0132139	428.234	0.00161821
6.2535e-13	1.28639e-12	1.06185e-14	9.85747e-16	2.44309e-17	7.87833e-13	3.44882e-14	7.49541e-14	3.34341e-10	2.16732e-11	1.44216e-12	3.78577e-09	5.81578e-13	3.09551e-08	1.79304e-16	6.47012e-15	7.61377e-13	7.895e-13	1.48453e-10	8.45337e-08	1.96964e-13	2.90261e-12	4.52437e-11	4.33996e-13	1.19224e-14	4.32142e-10	7.05027e-13	2.84007e-13	1.55089e-12	9.53713e-09	9.44486e-09	1.23099e-11	4.68921e-12	8.5849e-11	1921.67	0.000235446	0.000430788	0.000424853	4.69669e-05	0.000500702	0.0797104	1.55461	0.00338993	0.0723357	0.700818	6.63363e-06	0.00566852	0.015532	416.501	0.00164182
6.22051e-13	1.42921e-12	1.26809e-14	1.10216e-15	3.12173e-17	7.90945e-13	2.99783e-14	5.57955e-14	2.67161e-10	1.5803e-11	1.38445e-12	3.71328e-09	4.88739e-13	3.19933e-08	1.71947e-16	5.89176e-15	8.26413e-13	7.81305e-13	1.71209e-10	9.99347e-08	2.17135e-13	2.76799e-12	3.81149e-11	4.55363e-13	1.20829e-14	4.38334e-10	6.63984e-13	2.28848e-13	1.26641e-12	8.22986e-09	1.01144e-08	1.28794e-11	3.9036e-12	7.75309e-11	2069.31	0.000234812	0.000455758	0.000429424	4.22895e-05	0.000542996	0.0739558	1.16966	0.00384136	0.0958512	0.430103	7.44501e-06	0.00616425	0.0133953	500.959	0.00155448
6.24692e-13	1.44632e-12	1.26771e-14	8.47724e-16	2.89259e-17	8.08656e-13	3.79054e-14	7.4202e-14	2.59563e-10	2.13017e-11	1.41786e-12	3.73034e-09	7.08311e-13	2.93623e-08	1.89072e-16	6.9512e-15	7.8264e-13	7.55402e-13	1.40915e-10	5.2604e-08	1.95181e-13	3.29476e-12	4.41446e-11	4.17964e-13	1.09307e-14	4.32322e-10	6.5513e-13	2.69508e-13	1.35822e-12	6.78471e-09	9.54157e-09	1.34889e-11	5.03782e-12	8.28624e-11	1689.63	0.000218233	0.000441367	0.000459306	4.9963e-05	0.000530906	0.102787	1.4296	0.00350173	0.0556592	0.732485	3.88696e-06	0.00530001	0.013816	362.502	0.00159421
6.25485e-13	1.43154e-12	1.17582e-14	1.03516e-15	2.16924e-17	7.44129e-13	3.39859e-14	7.41325e-14	2.72798e-10	1.9272e-11	1.38757e-12	3.75694e-09	4.77124e-13	2.73654e-08	1.56997e-16	6.76738e-15	7.91193e-13	8.10281e-13	1.89735e-10	8.66166e-08	2.19483e-13	2.6986e-12	4.54633e-11	4.54609e-13	1.06964e-14	4.41486e-10	6.98994e-13	2.32545e-13	1.57614e-12	1.10123e-08	8.12549e-09	1.17068e-11	5.5622e-12	9.69392e-11	2167.31	0.000229926	0.00044044	0.000345096	4.2955e-05	0.000553913	0.0863432	1.29782	0.00370325	0.0735961	0.698809	7.9204e-06	0.00528068	0.0121137	396.967	0.00158
6.2535e-13	1.28639e-12	1.06185e-14	9.85747e-16	2.44309e-17	7.87833e-13	3.44882e-14	7.49541e-14	3.34341e-10	2.16732e-11	1.44216e-12	3.78577e-09	5.81578e-13	3.09551e-08	1.79304e-16	6.47012e-15	7.61377e-13	7.895e-13	1.48453e-10	8.45337e-08	1.96964e-13	2.90261e-12	4.52437e-11	4.33996e-13	1.19224e-14	4.32142e-10	7.05027e-13	2.84007e-13	1.55089e-12	9.53713e-09	9.44486e-09	1.23099e-11	4.68921e-12	8.5849e-11	1921.67	0.000235446	0.000430788	0.000424853	4.69669e-05	0.000500702	0.0797104	1.55461	0.00338993	0.0723357	0.700818	6.63363e-06	0.00566852	0.015532	416.501	0.00164182
6.25174e-13	1.21257e-12	1.10238e-14	1.14879e-15	2.43071e-17	7.90317e-13	3.87801e-14	7.83367e-14	3.51274e-10	2.11935e-11	1.41292e-12	3.40171e-09	5.75302e-13	2.01618e-08	1.79498e-16	5.37723e-15	7.97438e-13	7.62848e-13	1.45315e-10	9.8105e-08	2.31664e-13	3.13122e-12	4.89231e-11	4.30902e-13	1.15623e-14	4.61753e-10	6.99186e-13	2.73995e-13	1.51023e-12	8.82952e-09	1.04831e-08	1.15924e-11	4.37621e-12	9.88376e-11	2128.58	0.000234154	0.000430814	0.000366061	5.27568e-05	0.000479186	0.0636932	1.56538	0.00407435	0.0773072	0.540936	5.00377e-06	0.0056149	0.0161	413.249	0.0015651
6.25084e-13	1.22438e-12	1.11949e-14	1.03318e-15	2.34408e-17	7.99536e-13	2.80797e-14	7.46032e-14	3.46502e-10	2.04031e-11	1.43033e-12	3.55922e-09	4.9915e-13	2.92646e-08	2.07946e-16	6.43527e-15	7.03107e-13	7.35452e-13	1.4286e-10	8.06783e-08	2.11711e-13	3.08761e-12	3.84483e-11	4.06244e-13	1.55849e-14	4.41499e-10	6.68749e-13	2.65469e-13	1.53966e-12	9.80258e-09	9.48514e-09	1.3777e-11	4.80992e-12	7.90277e-11	1718.42	0.000219726	0.000408218	0.000393952	4.88051e-05	0.000591232	0.0808955	1.7923	0.00339908	0.0737195	0.725192	7.10844e-06	0.00641819	0.0170861	439.116	0.00171575
6.2501e-13	1.21217e-12	1.09764e-14	1.0428e-15	2.25805e-17	8.77114e-13	4.32585e-14	7.34726e-14	2.60902e-10	1.97745e-11	1.4114e-12	3.95192e-09	7.15343e-13	3.59097e-08	1.86682e-16	6.29963e-15	7.48894e-13	8.33155e-13	1.321e-10	8.44302e-08	1.9745e-13	3.46811e-12	4.62557e-11	4.66981e-13	1.33053e-14	4.55114e-10	7.73241e-13	2.69084e-13	1.43993e-12	9.38446e-09	9.70128e-09	1.36792e-11	4.92691e-12	9.96598e-11	1732.39	0.000227488	0.000425548	0.000387417	4.75544e-05	0.000514141	0.0766548	1.77492	0.00234471	0.0853821	0.67852	6.5397e-06	0.00638148	0.0152356	408.297	0.0015579
6.25097e-13	1.37715e-12	1.19178e-14	1.0935e-15	2.12204e-17	8.02051e-13	4.94722e-14	6.5898e-14	4.8355e-10	1.95796e-11	1.3996e-12	3.97393e-09	5.66769e-13	2.93239e-08	2.08898e-16	6.39811e-15	6.72707e-13	7.40082e-13	1.5944e-10	8.23523e-08	2.10745e-13	4.04222e-12	4.93133e-11	3.97884e-13	1.21922e-14	4.3481e-10	6.6146e-13	2.56949e-13	1.26912e-12	7.48352e-09	9.7821e-09	1.23731e-11	4.2944e-12	7.37512e-11	2030.37	0.000226404	0.000433142	0.000398479	4.66051e-05	0.000336094	0.0812809	1.35385	0.00364769	0.0830473	0.629944	8.66105e-06	0.00608459	0.01903	417.383	0.00165198
6.2535e-13	1.28639e-12	1.06185e-14	9.85747e-16	2.44309e-17	7.87833e-13	3.44882e-14	7.49541e-14	3.34341e-10	2.16732e-11	1.44216e-12	3.78577e-09	5.81578e-13	3.09551e-08	1.79304e-16	6.47012e-15	7.61377e-13	7.895e-13	1.48453e-10	8.45337e-08	1.96964e-13	2.90261e-12	4.52437e-11	4.33996e-13	1.19224e-14	4.32142e-10	7.05027e-13	2.84007e-13	1.55089e-12	9.53713e-09	9.44486e-09	1.23099e-11	4.68921e-12	8.5849e-11	1921.67	0.000235446	0.000430788	0.000424853	4.69669e-05	0.000500702	0.0797104	1.55461	0.00338993	0.0723357	0.700818	6.63363e-06	0.00566852	0.015532	416.501	0.00164182
6.24059e-13	1.38305e-12	1.65766e-14	1.07847e-15	2.83715e-17	8.15582e-13	3.99308e-14	7.22903e-14	2.81519e-10	2.66141e-11	1.38093e-12	5.01957e-09	4.70999e-13	3.72851e-08	2.19222e-16	6.28015e-15	5.13102e-13	8.03848e-13	1.37789e-10	9.47145e-08	2.6612e-13	2.39585e-12	4.7223e-11	3.9183e-13	1.19552e-14	7.29788e-10	6.16571e-13	2.38607e-13	1.44323e-12	8.92988e-09	9.65021e-09	1.37179e-11	4.55294e-12	1.16412e-10	2076.05	0.000230206	0.000452046	0.000428052	6.63085e-05	0.000453868	0.101574	1.64374	0.00364749	0.0930946	0.700558	7.74118e-06	0.0067275	0.0138737	320.123	0.00171147
6.25817e-13	1.19303e-12	1.71032e-14	8.20743e-16	2.44523e-17	7.41179e-13	2.89327e-14	7.12937e-14	3.45093e-10	2.33922e-11	1.35472e-12	4.66895e-09	5.34911e-13	3.84871e-08	1.55577e-16	5.90205e-15	9.59258e-13	7.86369e-13	1.47371e-10	6.87271e-08	2.41479e-13	2.90271e-12	4.6997e-11	3.95019e-13	1.09155e-14	3.70663e-10	6.62502e-13	1.98063e-13	1.38002e-12	1.31609e-08	1.18214e-08	2.11129e-11	5.33965e-12	9.67732e-11	1972.73	0.000247338	0.000434805	0.000409709	6.00563e-05	0.000201834	0.0723072	1.63038	0.00327765	0.0477474	0.800653	5.87942e-06	0.00570011	0.0184579	468.577	0.00153829
6.21337e-13	1.21768e-12	1.5423e-14	7.85888e-16	2.21917e-17	7.65024e-13	3.41435e-14	7.26439e-14	2.1766e-10	1.9503e-11	1.37647e-12	3.86055e-09	5.51417e-13	3.95137e-08	1.6748e-16	7.8028e-15	6.25615e-13	7.62558e-13	1.66383e-10	8.98777e-08	1.99724e-13	3.2328e-12	4.63878e-11	4.18401e-13	1.14003e-14	3.28367e-10	6.83073e-13	2.57712e-13	1.40948e-12	1.00055e-08	9.67235e-09	1.14453e-11	4.69991e-12	7.88481e-11	2491.53	0.000217074	0.000413936	0.000474909	4.64118e-05	0.000624726	0.0743945	1.63631	0.0033745	0.0623153	0.4743	6.39827e-06	0.00552382	0.0171789	449.475	0.00135134
6.2535e-13	1.28639e-12	1.06185e-14	9.85747e-16	2.44309e-17	7.87833e-13	3.44882e-14	7.49541e-14	3.34341e-10	2.16732e-11	1.44216e-12	3.78577e-09	5.81578e-13	3.09551e-08	1.79304e-16	6.47012e-15	7.61377e-13	7.895e-13	1.48453e-10	8.45337e-08	1.96964e-13	2.90261e-12	4.52437e-11	4.33996e-13	1.19224e-14	4.32142e-10	7.05027e-13	2.84007e-13	1.55089e-12	9.53713e-09	9.44486e-09	1.23099e-11	4.68921e-12	8.5849e-11	1921.67	0.000235446	0.000430788	0.000424853	4.69669e-05	0.000500702	0.0797104	1.55461	0.00338993	0.0723357	0.700818	6.63363e-06	0.00566852	0.015532	416.501	0.00164182
6.21298e-13	1.21029e-12	1.06903e-14	1.05561e-15	2.61298e-17	8.46231e-13	3.63724e-14	6.86166e-14	2.98023e-10	2.18128e-11	1.41836e-12	3.35713e-09	5.06628e-13	3.66768e-08	2.03124e-16	5.67971e-15	6.79553e-13	8.00337e-13	1.40873e-10	9.80716e-08	2.14169e-13	3.0923e-12	5.19277e-11	4.41268e-13	1.16534e-14	4.24688e-10	7.22088e-13	2.61284e-13	1.51984e-12	7.62198e-09	9.70221e-09	1.53636e-11	4.42374e-12	9.57649e-11	1980.19	0.000234275	0.000430342	0.000461095	4.57908e-05	0.000454821	0.0644369	1.50884	0.00329253	0.0645202	0.742985	7.18583e-06	0.00547285	0.014808	389.194	0.00155569
6.25167e-13	1.39119e-12	1.06801e-14	9.60056e-16	2.97077e-17	8.59977e-13	3.25981e-14	7.07434e-14	2.98881e-10	2.19003e-11	1.42941e-12	4.10992e-09	5.2209e-13	3.82719e-08	2.08639e-16	6.53603e-15	8.00702e-13	8.79634e-13	1.51118e-10	8.05699e-08	2.54759e-13	2.69366e-12	4.25792e-11	4.37383e-13	1.06691e-14	5.43763e-10	7.00168e-13	2.82707e-13	1.53183e-12	9.37502e-09	7.74163e-09	1.78102e-11	4.38539e-12	1.05031e-10	2045.42	0.000241851	0.000460593	0.000551806	4.34791e-05	0.000336707	0.0742016	1.35218	0.00178969	0.060765	0.616953	6.45966e-06	0.00655087	0.0147901	386.362	0.00133216
6.25523e-13	1.16043e-12	1.84184e-14	1.08048e-15	2.90194e-17	8.08335e-13	2.10936e-14	7.39987e-14	3.48238e-10	2.42994e-11	1.45042e-12	3.66123e-09	6.29476e-13	3.06241e-08	1.79342e-16	5.72511e-15	5.79429e-13	7.57892e-13	1.70183e-10	9.7351e-08	1.62154e-13	3.08182e-12	4.24392e-11	4.48027e-13	1.18796e-14	4.15511e-10	6.77279e-13	2.83778e-13	1.67413e-12	7.47903e-09	9.35536e-09	1.25011e-11	4.945e-12	9.14474e-11	1585.47	0.000222359	0.00042892	0.000356824	3.96549e-05	0.000427881	0.066989	1.66769	0.00321058	0.0713996	0.768815	7.02766e-06	0.00693509	0.016989	494.911	0.00178837
6.21323e-13	2.73179e-12	1.14133e-14	9.56123e-16	2.64351e-17	7.65489e-13	3.56034e-14	5.45683e-14	3.48771e-10	2.76053e-11	1.36486e-12	3.17397e-09	5.03167e-13	3.16223e-08	1.90213e-16	6.43355e-15	7.42555e-13	7.84982e-13	1.22154e-10	8.10607e-08	1.97137e-13	3.08296e-12	4.24937e-11	4.34216e-13	1.00061e-14	5.12461e-10	7.06915e-13	2.17401e-13	1.58118e-12	9.39099e-09	8.7251e-09	9.06021e-12	4.7474e-12	1.05728e-10	1603.61	0.000234184	0.00043076	0.000301776	4.74475e-05	0.000569738	0.19142	0.731616	0.00359792	0.0657861	0.420222	7.07221e-06	0.0055414	0.0191372	390.434	0.00147766
6.24855e-13	1.23318e-12	1.23365e-14	9.09929e-16	2.89395e-17	7.72055e-13	3.32177e-14	7.67979e-14	3.15471e-10	1.96294e-11	1.37315e-12	4.68413e-09	5.13745e-13	3.38226e-08	1.4705e-16	6.60123e-15	6.75325e-13	8.68779e-13	1.60732e-10	9.49089e-08	1.91552e-13	2.60908e-12	4.71094e-11	4.83637e-13	9.94518e-15	4.8715e-10	7.55435e-13	2.34224e-13	1.48608e-12	1.0367e-08	8.29931e-09	1.29089e-11	4.4448e-12	8.64411e-11	2462.26	0.000230674	0.000453981	0.000631694	4.09871e-05	0.00049842	0.0617222	1.45181	0.00412177	0.0433922	0.688069	6.80466e-06	0.00591998	0.0157592	475.805	0.00138061
6.25271e-13	1.21883e-12	1.10798e-14	8.79049e-16	1.66971e-17	8.17211e-13	3.6327e-14	7.65884e-14	4.66505e-10	2.35676e-11	1.37528e-12	4.05672e-09	5.22658e-13	4.09589e-08	1.90792e-16	6.2611e-15	6.68839e-13	7.75051e-13	1.60666e-10	7.95501e-08	1.89909e-13	2.49879e-12	5.42767e-11	4.39011e-13	7.88466e-15	4.40472e-10	6.91615e-13	2.28463e-13	1.50618e-12	1.102e-08	1.05696e-08	7.19169e-12	4.58365e-12	8.56802e-11	2036.61	0.000230656	0.000452275	0.00043614	6.47103e-05	0.000538369	0.0720983	1.73451	0.00547067	0.0710644	0.718662	6.09018e-06	0.00591702	0.025932	424.446	0.00143335
6.24194e-13	1.86921e-12	1.204e-14	9.31277e-16	2.79122e-17	7.98009e-13	2.54379e-14	6.56015e-14	4.06766e-10	2.19562e-11	1.41646e-12	4.10653e-09	5.27648e-13	2.46062e-08	1.7284e-16	6.71648e-15	7.53053e-13	8.5769e-13	1.21154e-10	7.4975e-08	1.95545e-13	2.58478e-12	4.90746e-11	4.64564e-13	1.21383e-14	5.02199e-10	7.1959e-13	2.57424e-13	1.31849e-12	9.1553e-09	9.36189e-09	1.18855e-11	5.32912e-12	7.81286e-11	1874.56	0.000231873	0.000444704	0.00047039	5.06228e-05	0.000506298	0.0882275	0.842319	0.00220993	0.0784228	0.510244	8.57484e-06	0.00778898	0.0190895	565.405	0.00161909
6.2535e-13	1.28639e-12	1.06185e-14	9.85747e-16	2.44309e-17	7.87833e-13	3.44882e-14	7.49541e-14	3.34341e-10	2.16732e-11	1.44216e-12	3.78577e-09	5.81578e-13	3.09551e-08	1.79304e-16	6.47012e-15	7.61377e-13	7.895e-13	1.48453e-10	8.45337e-08	1.96964e-13	2.90261e-12	4.52437e-11	4.33996e-13	1.19224e-14	4.32142e-10	7.05027e-13	2.84007e-13	1.55089e-12	9.53713e-09	9.44486e-09	1.23099e-11	4.68921e-12	8.5849e-11	1921.67	0.000235446	0.000430788	0.000424853	4.69669e-05	0.000500702	0.0797104	1.55461	0.00338993	0.0723357	0.700818	6.63363e-06	0.00566852	0.015532	416.501	0.00164182
6.25445e-13	1.27737e-12	1.24034e-14	9.26432e-16	4.2928e-17	8.04171e-13	5.35294e-14	7.88297e-14	3.84853e-10	2.40636e-11	1.40189e-12	3.95048e-09	5.9311e-13	4.4148e-08	1.76426e-16	7.26847e-15	6.96131e-13	8.15057e-13	1.35217e-10	9.1471e-08	2.19098e-13	3.85012e-12	5.35527e-11	4.35248e-13	1.092e-14	4.70422e-10	7.42171e-13	2.88915e-13	1.66184e-12	9.57537e-09	8.08813e-09	1.51688e-11	3.76841e-12	1.06419e-10	1508.62	0.000221612	0.000429786	0.000442141	4.94784e-05	0.000642192	0.0976201	2.10014	0.0029417	0.079822	0.633077	7.09507e-06	0.00439908	0.0165531	326.254	0.00132873
6.25204e-13	1.34804e-12	1.13617e-14	1.16376e-15	2.81414e-17	7.70457e-13	4.13693e-14	8.58237e-14	2.80477e-10	2.27495e-11	1.38433e-12	4.24741e-09	3.93923e-13	3.07062e-08	1.79095e-16	4.9456e-15	5.64286e-13	7.98469e-13	1.85997e-10	6.73484e-08	2.5106e-13	3.13548e-12	5.21265e-11	4.58667e-13	1.33029e-14	5.52636e-10	7.24549e-13	2.65168e-13	1.76773e-12	1.06619e-08	1.04233e-08	1.10824e-11	5.01171e-12	1.10699e-10	1734.37	0.000222421	0.000437075	0.000364457	4.81106e-05	0.000526578	0.0916886	1.51185	0.00326601	0.0582751	0.544887	6.81074e-06	0.00540766	0.0150894	557.987	0.00163735
6.25686e-13	1.30104e-12	1.13765e-14	1.04307e-15	2.34174e-17	8.14397e-13	3.39176e-14	7.26442e-14	2.5274e-10	2.13635e-11	1.42115e-12	4.16902e-09	5.41916e-13	2.60932e-08	1.71723e-16	6.23275e-15	6.71599e-13	7.73945e-13	1.35028e-10	9.64532e-08	2.09375e-13	2.7442e-12	5.43213e-11	4.11416e-13	1.15921e-14	4.53153e-10	7.30133e-13	2.61263e-13	1.76098e-12	9.77635e-09	9.92462e-09	1.35596e-11	4.90739e-12	7.0237e-11	2872.43	0.000231949	0.000422451	0.000491276	4.32094e-05	0.000393994	0.0767184	1.41701	0.00273918	0.0765374	0.718338	7.67414e-06	0.0057505	0.0174346	273.754	0.00145822
6.2535e-13	1.28639e-12	1.06185e-14	9.85747e-16	2.44309e-17	7.87833e-13	3.44882e-14	7.49541e-14	3.34341e-10	2.16732e-11	1.44216e-12	3.78577e-09	5.81578e-13	3.09551e-08	1.79304e-16	6.47012e-15	7.61377e-13	7.895e-13	1.48453e-10	8.45337e-08	1.96964e-13	2.90261e-12	4.52437e-11	4.33996e-13	1.19224e-14	4.32142e-10	7.05027e-13	2.84007e-13	1.55089e-12	9.53713e-09	9.44486e-09	1.23099e-11	4.68921e-12	8.5849e-11	1921.67	0.000235446	0.000430788	0.000424853	4.69669e-05	0.000500702	0.0797104	1.55461	0.00338993	0.0723357	0.700818	6.63363e-06	0.00566852	0.015532	416.501	0.00164182
6.25243e-13	1.38861e-12	1.27882e-14	7.97878e-16	2.43558e-17	7.98209e-13	3.88582e-14	7.82608e-14	3.36373e-10	2.21329e-11	1.37321e-12	4.22767e-09	5.08683e-13	3.10802e-08	2.35391e-16	5.88278e-15	7.19629e-13	8.4857e-13	1.7243e-10	6.1034e-08	1.83832e-13	3.02161e-12	4.12566e-11	4.36408e-13	1.10575e-14	5.43152e-10	7.41015e-13	2.25306e-13	1.64604e-12	9.93377e-09	9.34201e-09	1.35497e-11	4.43694e-12	1.34779e-10	2137.65	0.00023166	0.00042433	0.000289303	4.81502e-05	0.00066575	0.0832444	1.36507	0.00273178	0.0777709	0.753681	6.8164e-06	0.00456173	0.0174498	464.744	0.00160504
6.25465e-13	4.12236e-12	1.22457e-14	1.14603e-15	2.42872e-17	7.58575e-13	3.71279e-14	7.96769e-14	2.91834e-10	2.83359e-11	1.41771e-12	3.53319e-09	5.42523e-13	2.8438e-08	2.12756e-16	6.13638e-15	1.09563e-12	7.21073e-13	1.50037e-10	6.19794e-08	2.19968e-13	2.84379e-12	4.37154e-11	4.01652e-13	1.35992e-14	4.99226e-10	6.56963e-13	2.65778e-13	1.36927e-12	8.59872e-09	9.89768e-09	1.53168e-11	4.88406e-12	1.34924e-10	1543.89	0.000221667	0.000438845	0.00033906	3.62989e-05	0.000472566	0.218681	0.562836	0.00380475	0.0664248	0.738647	7.25948e-06	0.00570139	0.0166679	379.842	0.00167504
6.25447e-13	1.24885e-12	1.12358e-14	1.00828e-15	2.49073e-17	7.82848e-13	3.96236e-14	5.94869e-14	3.4368e-10	2.91002e-11	1.43079e-12	3.77657e-09	5.9186e-13	2.81301e-08	1.94156e-16	6.55437e-15	7.42092e-13	7.97491e-13	1.54101e-10	7.5916e-08	2.15364e-13	2.74892e-12	4.42558e-11	4.31244e-13	1.03987e-14	4.91315e-10	6.98985e-13	2.62546e-13	1.34666e-12	1.00532e-08	1.01234e-08	1.13915e-11	4.6821e-12	9.08236e-11	1920.23	0.000232878	0.000448834	0.00042662	5.06301e-05	0.000432066	0.0745655	1.66422	0.00368634	0.0719245	0.587602	6.11598e-06	0.00582325	0.0162556	362.841	0.00181837
6.2535e-13	1.28639e-12	1.06185e-14	9.85747e-16	2.44309e-17	7.87833e-13	3.44882e-14	7.49541e-14	3.34341e-10	2.16732e-11	1.44216e-12	3.78577e-09	5.81578e-13	3.09551e-08	1.79304e-16	6.47012e-15	7.61377e-13	7.895e-13	1.48453e-10	8.45337e-08	1.96964e-13	2.90261e-12	4.52437e-11	4.33996e-13	1.19224e-14	4.32142e-10	7.05027e-13	2.84007e-13	1.55089e-12	9.53713e-09	9.44486e-09	1.23099e-11	4.68921e-12	8.5849e-11	1921.67	0.000235446	0.000430788	0.000424853	4.69669e-05	0.000500702	0.0797104	1.55461	0.00338993	0.0723357	0.700818	6.63363e-06	0.00566852	0.015532	416.501	0.00164182
6.2535e-13	1.28639e-12	1.06185e-14	9.85747e-16	2.44309e-17	7.87833e-13	3.44882e-14	7.49541e-14	3.34341e-10	2.16732e-11	1.44216e-12	3.78577e-09	5.81578e-13	3.09551e-08	1.79304e-16	6.47012e-15	7.61377e-13	7.895e-13	1.48453e-10	8.45337e-08	1.96964e-13	2.90261e-12	4.52437e-11	4.33996e-13	1.19224e-14	4.32142e-10	7.05027e-13	2.84007e-13	1.55089e-12	9.53713e-09	9.44486e-09	1.23099e-11	4.68921e-12	8.5849e-11	1921.67	0.000235446	0.000430788	0.000424853	4.69669e-05	0.000500702	0.0797104	1.55461	0.00338993	0.0723357	0.700818	6.63363e-06	0.00566852	0.015532	416.501	0.00164182
6.25267e-13	1.25482e-12	1.64468e-14	8.11748e-16	2.59971e-17	8.63e-13	3.60738e-14	6.79512e-14	3.78655e-10	2.1298e-11	1.4462e-12	3.90234e-09	6.54973e-13	2.84833e-08	1.71627e-16	6.52017e-15	5.88071e-13	8.41041e-13	1.3956e-10	9.09089e-08	1.81675e-13	2.93852e-12	4.73191e-11	4.39222e-13	7.75296e-15	5.60684e-10	7.60386e-13	2.78068e-13	1.64533e-12	8.74811e-09	9.98382e-09	1.22355e-11	5.06403e-12	6.81985e-11	2241.62	0.00023658	0.000442387	0.000335985	5.37763e-05	0.000457946	0.0806558	1.61731	0.00326431	0.0598222	0.837547	4.23764e-06	0.0060438	0.0144262	513.921	0.00184128
6.25387e-13	1.14104e-12	1.31541e-14	9.60154e-16	2.71536e-17	7.65707e-13	2.91748e-14	8.95587e-14	3.67642e-10	1.82523e-11	1.37285e-12	3.70328e-09	5.45957e-13	2.9496e-08	1.90821e-16	7.296e-15	7.25115e-13	8.07205e-13	1.47619e-10	8.75398e-08	1.81185e-13	3.47112e-12	5.2678e-11	4.36939e-13	1.19908e-14	3.54767e-10	7.46632e-13	2.35283e-13	1.54425e-12	1.18257e-08	8.84306e-09	1.07656e-11	4.95428e-12	9.81872e-11	2482.14	0.000239948	0.000456113	0.000482568	4.43016e-05	0.000578579	0.0567266	1.74014	0.0032538	0.0702254	0.733891	7.57419e-06	0.0059484	0.0142543	369.812	0.00159452
6.25394e-13	1.37078e-12	1.12413e-14	9.88912e-16	3.14614e-17	7.60042e-13	3.09077e-14	7.98223e-14	2.99337e-10	2.42738e-11	1.43052e-12	3.34018e-09	5.75943e-13	2.96366e-08	2.22773e-16	7.30493e-15	6.93721e-13	7.68905e-13	1.05675e-10	8.89607e-08	2.05854e-13	3.00796e-12	4.77597e-11	3.81752e-13	1.10991e-14	3.56246e-10	6.51525e-13	2.7725e-13	1.45664e-12	9.89011e-09	9.43476e-09	1.45738e-11	4.77765e-12	7.43914e-11	2451.74	0.000226762	0.000423864	0.000328197	3.98972e-05	0.00031676	0.0828639	1.33535	0.00334084	0.0837665	0.772285	6.24225e-06	0.0060366	0.0143253	478.043	0.00149696
6.2535e-13	1.28639e-12	1.06185e-14	9.85747e-16	2.44309e-17	7.87833e-13	3.44882e-14	7.49541e-14	3.34341e-10	2.16732e-11	1.44216e-12	3.78577e-09	5.81578e-13	3.09551e-08	1.79304e-16	6.47012e-15	7.61377e-13	7.895e-13	1.48453e-10	8.45337e-08	1.96964e-13	2.90261e-12	4.52437e-11	4.33996e-13	1.19224e-14	4.32142e-10	7.05027e-13	2.84007e-13	1.55089e-12	9.53713e-09	9.44486e-09	1.23099e-11	4.68921e-12	8.5849e-11	1921.67	0.000235446	0.000430788	0.000424853	4.69669e-05	0.000500702	0.0797104	1.55461	0.00338993	0.0723357	0.700818	6.63363e-06	0.00566852	0.015532	416.501	0.00164182
6.21313e-13	1.2588e-12	1.04431e-14	9.67818e-16	2.27476e-17	7.75266e-13	3.45883e-14	6.84387e-14	3.16146e-10	1.72147e-11	1.3996e-12	4.02664e-09	6.84305e-13	3.99789e-08	2.77237e-16	8.50013e-15	7.74257e-13	8.03334e-13	1.6083e-10	7.73558e-08	2.86163e-13	3.15148e-12	4.47842e-11	4.57634e-13	9.00139e-15	4.24802e-10	6.93702e-13	2.57349e-13	1.36816e-12	9.11544e-09	8.93829e-09	1.06254e-11	5.13691e-12	8.05208e-11	1767.14	0.000224844	0.000432582	0.000648771	4.05899e-05	0.000467734	0.084782	1.75045	0.00156904	0.0832868	0.677819	6.37745e-06	0.00527936	0.0164056	371.718	0.00134386
6.21332e-13	1.17804e-12	1.09549e-14	9.31575e-16	3.09963e-17	7.54744e-13	3.7058e-14	8.18189e-14	3.40159e-10	2.1984e-11	1.37818e-12	4.36501e-09	6.4196e-13	3.35819e-08	1.40114e-16	7.35968e-15	7.43549e-13	7.79244e-13	1.25548e-10	7.58495e-08	2.24237e-13	2.8734e-12	4.68058e-11	3.84551e-13	1.10507e-14	5.61325e-10	6.46791e-13	2.36182e-13	1.3798e-12	8.09335e-09	9.15623e-09	1.50529e-11	5.03118e-12	8.27102e-11	1870.83	0.000225061	0.000432539	0.00031733	5.05177e-05	0.00051233	0.0468538	1.44587	0.00378986	0.0607449	0.956173	6.20195e-06	0.00508366	0.0146753	366.326	0.00122475
6.25518e-13	1.27978e-12	1.16859e-14	1.07847e-15	1.29954e-17	8.80826e-13	3.55868e-14	7.8553e-14	3.07154e-10	2.33532e-11	1.42368e-12	3.62002e-09	7.37074e-13	4.67339e-08	1.67348e-16	6.97781e-15	7.62752e-13	8.82341e-13	1.4919e-10	9.82493e-08	2.54055e-13	2.76817e-12	4.66281e-11	4.57661e-13	1.20282e-14	3.52373e-10	7.47147e-13	2.91081e-13	1.63346e-12	9.61292e-09	1.12223e-08	1.47847e-11	4.86915e-12	1.00042e-10	1886.33	0.000225325	0.000445332	0.000445106	4.84148e-05	0.00061765	0.0700139	1.39095	0.00585102	0.0558175	0.388476	6.73751e-06	0.0112743	0.0130743	444.628	0.00177809
6.25891e-13	1.27642e-12	1.16777e-14	9.44157e-16	2.54783e-17	7.67329e-13	3.15614e-14	8.24678e-14	4.13556e-10	2.15199e-11	1.4351e-12	3.45142e-09	5.72161e-13	3.49013e-08	1.81485e-16	6.07687e-15	5.19111e-13	7.48078e-13	1.46433e-10	9.6991e-08	1.74629e-13	2.82303e-12	4.42165e-11	4.19678e-13	1.08358e-14	4.61733e-10	6.8807e-13	2.8703e-13	1.5081e-12	9.38417e-09	1.05426e-08	1.15972e-11	4.64319e-12	8.99695e-11	1868.4	0.000233547	0.000429679	0.000459395	4.42856e-05	0.000408076	0.0785231	1.53853	0.00345013	0.0923537	0.633208	7.72046e-06	0.00578121	0.0199131	454.057	0.00161199
6.21296e-13	1.47034e-12	2.45543e-14	9.21467e-16	2.63115e-17	7.33243e-13	3.0617e-14	7.38617e-14	2.36879e-10	2.14343e-11	1.40067e-12	4.06053e-09	5.58302e-13	2.3054e-08	1.62986e-16	7.15617e-15	8.3998e-13	7.65908e-13	1.66275e-10	8.78428e-08	1.85472e-13	2.86419e-12	4.34287e-11	4.10789e-13	1.10751e-14	3.92603e-10	6.71345e-13	2.71473e-13	1.61624e-12	8.66262e-09	1.05729e-08	1.07695e-11	4.62709e-12	1.05942e-10	2147.98	0.00021583	0.000438776	0.00034386	5.62393e-05	0.00046956	0.0727133	1.03757	0.00328467	0.0618554	0.699185	5.68084e-06	0.00543479	0.0184562	377.896	0.0017518
6.24329e-13	1.29348e-12	1.09602e-14	9.63585e-16	2.0035e-17	7.60822e-13	3.32139e-14	6.61622e-14	3.15604e-10	2.42382e-11	1.43118e-12	4.25611e-09	5.22157e-13	3.04088e-08	1.67255e-16	6.31664e-15	7.51683e-13	7.31269e-13	1.4367e-10	7.88864e-08	2.11064e-13	2.6873e-12	4.67762e-11	4.0786e-13	1.10292e-14	4.18259e-10	6.78802e-13	2.65031e-13	1.51437e-12	9.68983e-09	9.87815e-09	1.00307e-11	4.0284e-12	1.08966e-10	1912.19	0.000222062	0.000428143	0.000387997	4.85686e-05	0.000800079	0.0751286	1.48071	0.00488848	0.0454624	0.603793	6.55863e-06	0.00565112	0.0170524	428.275	0.00177365
6.23507e-13	1.30555e-12	1.18326e-14	9.24874e-16	2.31784e-17	8.3687e-13	2.92777e-14	5.88276e-14	3.06787e-10	2.35835e-11	1.4159e-12	3.57813e-09	4.35348e-13	2.60494e-08	2.52885e-16	5.69677e-15	8.01908e-13	8.20079e-13	1.54512e-10	7.69039e-08	2.23062e-13	2.98587e-12	4.98328e-11	4.44299e-13	9.93302e-15	4.25673e-10	7.26265e-13	2.37962e-13	1.36858e-12	1.09881e-08	7.73859e-09	1.46467e-11	4.43512e-12	7.87921e-11	2452.06	0.000216816	0.000450636	0.000447365	5.80196e-05	0.000536914	0.0808159	1.5148	0.00343474	0.0785275	0.660853	4.68299e-06	0.00851825	0.0142641	392.114	0.00174673
6.2535e-13	1.28639e-12	1.06185e-14	9.85747e-16	2.44309e-17	7.87833e-13	3.44882e-14	7.49541e-14	3.34341e-10	2.16732e-11	1.44216e-12	3.78577e-09	5.81578e-13	3.09551e-08	1.79304e-16	6.47012e-15	7.61377e-13	7.895e-13	1.48453e-10	8.45337e-08	1.96964e-13	2.90261e-12	4.52437e-11	4.33996e-13	1.19224e-14	4.32142e-10	7.05027e-13	2.84007e-13	1.55089e-12	9.53713e-09	9.44486e-09	1.23099e-11	4.68921e-12	8.5849e-11	1921.67	0.000235446	0.000430788	0.000424853	4.69669e-05	0.000500702	0.0797104	1.55461	0.00338993	0.0723357	0.700818	6.63363e-06	0.00566852	0.015532	416.501	0.00164182
6.21282e-13	1.27208e-12	1.08286e-14	8.49297e-16	2.42059e-17	7.75497e-13	3.42565e-14	7.01972e-14	3.07487e-10	1.97192e-11	1.39799e-12	3.79221e-09	5.81664e-13	2.98638e-08	1.5407e-16	6.25943e-15	7.74255e-13	7.60572e-13	1.70902e-10	7.27749e-08	2.19297e-13	2.85073e-12	4.82106e-11	4.12944e-13	1.22231e-14	4.33128e-10	6.49257e-13	2.59555e-13	1.48961e-12	8.7233e-09	9.91718e-09	1.25065e-11	4.30698e-12	9.76746e-11	2598.03	0.000224176	0.000417386	0.000383448	4.19429e-05	0.00042211	0.0789448	1.67097	0.00255605	0.0628759	0.62243	5.65362e-06	0.0054736	0.0169906	390.325	0.00144671
6.25001e-13	1.35235e-12	1.11205e-14	1.22648e-15	2.08443e-17	9.0088e-13	3.75449e-14	7.66854e-14	2.95952e-10	2.00306e-11	1.39275e-12	4.09198e-09	6.15396e-13	3.94674e-08	1.75081e-16	5.93138e-15	7.28142e-13	8.01302e-13	1.56068e-10	8.3994e-08	1.85431e-13	3.18563e-12	3.76065e-11	4.41318e-13	1.29511e-14	4.13302e-10	7.44141e-13	2.4975e-13	1.69308e-12	9.8355e-09	9.03154e-09	9.72695e-12	4.80935e-12	1.21793e-10	1818.6	0.000238967	0.000449515	0.000345136	4.55239e-05	0.000590833	0.0659887	1.21049	0.00346537	0.0721324	0.706876	5.99364e-06	0.00804878	0.017793	452.996	0.00150954
6.2535e-13	1.28639e-12	1.06185e-14	9.85747e-16	2.44309e-17	7.87833e-13	3.44882e-14	7.49541e-14	3.34341e-10	2.16732e-11	1.44216e-12	3.78577e-09	5.81578e-13	3.09551e-08	1.79304e-16	6.47012e-15	7.61377e-13	7.895e-13	1.48453e-10	8.45337e-08	1.96964e-13	2.90261e-12	4.52437e-11	4.33996e-13	1.19224e-14	4.32142e-10	7.05027e-13	2.84007e-13	1.55089e-12	9.53713e-09	9.44486e-09	1.23099e-11	4.68921e-12	8.5849e-11	1921.67	0.000235446	0.000430788	0.000424853	4.69669e-05	0.000500702	0.0797104	1.55461	0.00338993	0.0723357	0.700818	6.63363e-06	0.00566852	0.015532	416.501	0.00164182
6.25416e-13	1.34071e-12	1.1241e-14	9.48347e-16	2.23603e-17	7.65535e-13	3.76612e-14	6.38943e-14	3.41475e-10	2.10752e-11	1.36473e-12	4.92691e-09	6.08458e-13	1.93482e-08	2.25742e-16	7.63921e-15	5.12627e-13	7.79011e-13	1.73951e-10	8.06163e-08	2.82116e-13	3.13701e-12	4.15345e-11	4.11155e-13	9.34242e-15	3.02755e-10	6.71452e-13	2.18875e-13	1.2838e-12	1.33795e-08	1.03924e-08	1.38914e-11	4.96121e-12	8.43091e-11	1533.42	0.000231611	0.000422824	0.000417734	4.73217e-05	0.000530734	0.0793425	1.41827	0.0047064	0.0775533	0.445472	9.87764e-06	0.00598027	0.0153884	409.644	0.0015302
6.23497e-13	1.59214e-12	1.08082e-14	1.05313e-15	2.56977e-17	8.50631e-13	3.75411e-14	7.39089e-14	2.55267e-10	2.23465e-11	1.4289e-12	4.45812e-09	6.28538e-13	3.21445e-08	1.7325e-16	7.58207e-15	8.20956e-13	8.04994e-13	1.29037e-10	7.99967e-08	1.87257e-13	3.13199e-12	4.8655e-11	4.32338e-13	1.18475e-14	4.62972e-10	7.48317e-13	2.94392e-13	1.65884e-12	9.12639e-09	9.0553e-09	1.31015e-11	4.59804e-12	8.63168e-11	1887.79	0.000241893	0.000425986	0.000485284	5.06374e-05	0.000572832	0.0785664	0.981425	0.0031057	0.0792496	0.603062	7.27304e-06	0.00656244	0.0144318	410.602	0.00134508
6.25146e-13	1.23428e-12	1.0963e-14	1.30136e-15	2.73925e-17	8.03573e-13	3.59985e-14	6.67508e-14	3.78262e-10	1.81321e-11	1.44114e-12	3.79581e-09	4.93691e-13	3.83881e-08	1.57564e-16	6.78028e-15	7.6978e-13	8.65495e-13	1.65446e-10	8.9011e-08	1.86035e-13	3.41443e-12	4.53133e-11	4.46032e-13	1.30097e-14	3.78986e-10	8.0843e-13	2.88788e-13	1.52729e-12	8.95372e-09	9.88449e-09	9.70806e-12	4.70625e-12	9.79735e-11	1788.38	0.000243347	0.000440651	0.000478283	3.87811e-05	0.000596849	0.0740161	1.68115	0.00346254	0.0587642	0.605447	7.53183e-06	0.00724898	0.0178888	461.172	0.00147198
6.2352e-13	1.32238e-12	1.34067e-14	9.76548e-16	2.60811e-17	7.72121e-13	3.72553e-14	6.27301e-14	2.83052e-10	3.25116e-11	1.44063e-12	3.28419e-09	6.414e-13	3.37116e-08	1.83784e-16	6.64931e-15	7.68091e-13	7.48375e-13	1.34504e-10	7.70876e-08	2.10777e-13	2.86409e-12	4.26764e-11	4.12149e-13	1.31481e-14	3.83702e-10	6.82516e-13	2.7575e-13	1.22615e-12	9.02671e-09	9.81149e-09	1.73623e-11	4.42801e-12	8.61357e-11	1445.39	0.000213066	0.000425172	0.00028491	5.13854e-05	0.000493418	0.0921252	1.60192	0.00453227	0.063453	0.739029	9.32288e-06	0.00512056	0.0196541	414.609	0.00165821
6.25289e-13	1.25973e-12	1.26872e-14	1.03735e-15	2.13064e-17	8.74057e-13	3.47058e-14	7.30213e-14	3.955e-10	2.22022e-11	1.40178e-12	2.99637e-09	5.53499e-13	3.55074e-08	1.77491e-16	4.97014e-15	6.68e-13	7.66527e-13	1.51523e-10	7.12939e-08	2.30759e-13	3.39705e-12	4.26742e-11	3.84279e-13	1.1845e-14	4.19273e-10	6.83875e-13	2.59508e-13	1.33335e-12	8.98992e-09	7.53274e-09	1.31019e-11	4.38089e-12	9.48969e-11	2069.43	0.000245009	0.000412362	0.000387907	5.78374e-05	0.000500535	0.0760011	1.54774	0.00366753	0.0673084	0.621417	5.34694e-06	0.00730042	0.0231308	428.919	0.00151383
6.24216e-13	1.24063e-12	1.11994e-14	1.09868e-15	2.79457e-17	7.53953e-13	4.79811e-14	7.30705e-14	3.14344e-10	2.09152e-11	1.41635e-12	3.30615e-09	5.36126e-13	3.60393e-08	1.98677e-16	5.89977e-15	6.95014e-13	7.81256e-13	1.09057e-10	8.69903e-08	2.40386e-13	2.57605e-12	4.53025e-11	3.92452e-13	9.26574e-15	4.35002e-10	6.64321e-13	2.74105e-13	1.41031e-12	9.92979e-09	9.71771e-09	1.3471e-11	5.44848e-12	7.27405e-11	1793.06	0.000251858	0.000428947	0.000507764	4.64339e-05	0.000538824	0.0837526	1.88116	0.00500858	0.0742767	0.690277	1.22465e-05	0.00503415	0.0137736	458.465	0.00158703
6.2547e-13	1.50226e-12	1.19749e-14	8.99738e-16	2.64703e-17	7.66479e-13	5.98161e-14	8.18731e-14	3.33e-10	2.66622e-11	1.39697e-12	4.41905e-09	5.31571e-13	3.31685e-08	1.97037e-16	5.78398e-15	7.85705e-13	8.18125e-13	1.71208e-10	6.83701e-08	1.88528e-13	2.57269e-12	4.57215e-11	4.60566e-13	1.20308e-14	3.13056e-10	7.16734e-13	2.52222e-13	1.54446e-12	6.58872e-09	8.86193e-09	1.22706e-11	3.76111e-12	8.0013e-11	1838.17	0.000223057	0.000464039	0.000387015	5.04522e-05	0.000490016	0.0995754	1.27924	0.00609562	0.0719007	0.969121	6.09445e-06	0.0042706	0.0156463	349.104	0.00178659
6.21315e-13	1.29568e-12	1.09238e-14	1.05022e-15	2.78067e-17	8.96413e-13	3.85033e-14	6.74154e-14	2.60119e-10	2.13065e-11	1.39229e-12	3.56164e-09	6.44576e-13	3.00177e-08	1.52953e-16	6.28187e-15	7.47989e-13	8.04841e-13	1.42253e-10	7.46935e-08	1.77897e-13	2.85707e-12	4.63619e-11	4.26376e-13	1.30659e-14	5.17524e-10	6.95633e-13	2.47964e-13	1.36768e-12	8.12286e-09	9.95432e-09	1.26005e-11	5.01739e-12	9.88139e-11	2210.36	0.000224489	0.000412706	0.000462894	4.97912e-05	0.000478088	0.0711488	1.43822	0.0033988	0.0807027	0.614968	5.76972e-06	0.00608881	0.0134094	305.597	0.00145675
6.2535e-13	1.28639e-12	1.06185e-14	9.85747e-16	2.44309e-17	7.87833e-13	3.44882e-14	7.49541e-14	3.34341e-10	2.16732e-11	1.44216e-12	3.78577e-09	5.81578e-13	3.09551e-08	1.79304e-16	6.47012e-15	7.61377e-13	7.895e-13	1.48453e-10	8.45337e-08	1.96964e-13	2.90261e-12	4.52437e-11	4.33996e-13	1.19224e-14	4.32142e-10	7.05027e-13	2.84007e-13	1.55089e-12	9.53713e-09	9.44486e-09	1.23099e-11	4.68921e-12	8.5849e-11	1921.67	0.000235446	0.000430788	0.000424853	4.69669e-05	0.000500702	0.0797104	1.55461	0.00338993	0.0723357	0.700818	6.63363e-06	0.00566852	0.015532	416.501	0.00164182
6.2535e-13	1.28639e-12	1.06185e-14	9.85747e-16	2.44309e-17	7.87833e-13	3.44882e-14	7.49541e-14	3.34341e-10	2.16732e-11	1.44216e-12	3.78577e-09	5.81578e-13	3.09551e-08	1.79304e-16	6.47012e-15	7.61377e-13	7.895e-13	1.48453e-10	8.45337e-08	1.96964e-13	2.90261e-12	4.52437e-11	4.33996e-13	1.19224e-14	4.32142e-10	7.05027e-13	2.84007e-13	1.55089e-12	9.53713e-09	9.44486e-09	1.23099e-11	4.68921e-12	8.5849e-11	1921.67	0.000235446	0.000430788	0.000424853	4.69669e-05	0.000500702	0.0797104	1.55461	0.00338993	0.0723357	0.700818	6.63363e-06	0.00566852	0.015532	416.501	0.00164182
6.2535e-13	1.28639e-12	1.06185e-14	9.85747e-16	2.44309e-17	7.87833e-13	3.44882e-14	7.49541e-14	3.34341e-10	2.16732e-11	1.44216e-12	3.78577e-09	5.81578e-13	3.09551e-08	1.79304e-16	6.47012e-15	7.61377e-13	7.895e-13	1.48453e-10	8.45337e-08	1.96964e-13	2.90261e-12	4.52437e-11	4.33996e-13	1.19224e-14	4.32142e-10	7.05027e-13	2.84007e-13	1.55089e-12	9.53713e-09	9.44486e-09	1.23099e-11	4.68921e-12	8.5849e-11	1921.67	0.000235446	0.000430788	0.000424853	4.69669e-05	0.000500702	0.0797104	1.55461	0.00338993	0.0723357	0.700818	6.63363e-06	0.00566852	0.015532	416.501	0.00164182
6.24665e-13	1.3673e-12	1.08422e-14	9.38172e-16	2.61084e-17	7.75088e-13	2.27663e-14	9.31044e-14	4.16257e-10	2.0148e-11	1.39772e-12	3.86903e-09	4.90182e-13	2.10812e-08	2.14846e-16	6.68127e-15	8.24085e-13	7.86132e-13	1.28707e-10	8.66126e-08	1.79843e-13	2.78102e-12	3.9747e-11	4.09872e-13	1.16922e-14	4.53431e-10	6.86804e-13	2.63899e-13	1.55617e-12	8.67746e-09	9.40411e-09	1.55905e-11	4.01825e-12	8.74881e-11	1738.52	0.000228585	0.000434836	0.000400171	4.01796e-05	0.000426854	0.089282	1.44298	0.00318844	0.0880503	0.615176	5.77881e-06	0.00644072	0.0190585	468.685	0.00159053
6.2535e-13	1.28639e-12	1.06185e-14	9.85747e-16	2.44309e-17	7.87833e-13	3.44882e-14	7.49541e-14	3.34341e-10	2.16732e-11	1.44216e-12	3.78577e-09	5.81578e-13	3.09551e-08	1.79304e-16	6.47012e-15	7.61377e-13	7.895e-13	1.48453e-10	8.45337e-08	1.96964e-13	2.90261e-12	4.52437e-11	4.33996e-13	1.19224e-14	4.32142e-10	7.05027e-13	2.84007e-13	1.55089e-12	9.53713e-09	9.44486e-09	1.23099e-11	4.68921e-12	8.5849e-11	1921.67	0.000235446	0.000430788	0.000424853	4.69669e-05	0.000500702	0.0797104	1.55461	0.00338993	0.0723357	0.700818	6.63363e-06	0.00566852	0.015532	416.501	0.00164182
6.2535e-13	1.28639e-12	1.06185e-14	9.85747e-16	2.44309e-17	7.87833e-13	3.44882e-14	7.49541e-14	3.34341e-10	2.16732e-11	1.44216e-12	3.78577e-09	5.81578e-13	3.09551e-08	1.79304e-16	6.47012e-15	7.61377e-13	7.895e-13	1.48453e-10	8.45337e-08	1.96964e-13	2.90261e-12	4.52437e-11	4.33996e-13	1.19224e-14	4.32142e-10	7.05027e-13	2.84007e-13	1.55089e-12	9.53713e-09	9.44486e-09	1.23099e-11	4.68921e-12	8.5849e-11	1921.67	0.000235446	0.000430788	0.000424853	4.69669e-05	0.000500702	0.0797104	1.55461	0.00338993	0.0723357	0.700818	6.63363e-06	0.00566852	0.015532	416.501	0.00164182
6.25414e-13	1.19127e-12	1.09446e-14	9.3358e-16	2.66617e-17	8.90313e-13	2.99765e-14	4.37827e-14	3.97582e-10	2.11076e-11	1.44696e-12	4.2497e-09	5.42383e-13	2.54091e-08	2.24783e-16	5.91583e-15	4.67337e-13	7.79834e-13	1.53892e-10	6.07756e-08	2.28756e-13	2.50603e-12	4.0974e-11	3.9372e-13	1.15818e-14	4.3289e-10	6.41124e-13	2.36199e-13	1.5442e-12	6.47759e-09	9.27272e-09	1.44309e-11	4.91207e-12	9.29343e-11	2248.01	0.000235309	0.000411876	0.000384499	4.2711e-05	0.000513832	0.0615848	1.55989	0.00300742	0.0723678	0.882304	5.48416e-06	0.00639088	0.0141236	345.323	0.0015736
6.24358e-13	1.24027e-12	1.32259e-14	1.25319e-15	1.61205e-17	9.49828e-13	2.83372e-14	7.76059e-14	2.68973e-10	2.62399e-11	1.39283e-12	3.35169e-09	6.07499e-13	3.00662e-08	1.50436e-16	7.13278e-15	7.43279e-13	8.69121e-13	1.56464e-10	7.34947e-08	1.88061e-13	2.72793e-12	4.82896e-11	4.80014e-13	1.19474e-14	3.14114e-10	7.63336e-13	2.19476e-13	1.3323e-12	1.11694e-08	9.43792e-09	1.44868e-11	4.6027e-12	8.9385e-11	1810.51	0.000221072	0.000411546	0.000493508	4.94304e-05	0.00049563	0.0894961	1.87576	0.00500194	0.0754067	1.0184	6.63556e-06	0.00799595	0.0168965	439.602	0.00165945
6.23539e-13	1.30656e-12	1.06469e-14	9.07399e-16	2.5827e-17	7.13326e-13	3.37503e-14	7.65502e-14	3.59601e-10	1.88117e-11	1.38962e-12	3.37005e-09	6.87289e-13	3.40196e-08	1.69431e-16	7.2146e-15	1.00329e-12	8.04155e-13	1.45469e-10	9.12498e-08	2.00824e-13	3.18423e-12	3.62459e-11	4.09785e-13	1.15274e-14	4.22516e-10	6.79017e-13	2.45107e-13	1.38524e-12	1.06712e-08	8.68949e-09	1.37919e-11	4.39751e-12	9.70475e-11	1667.73	0.000223609	0.000439387	0.000498055	4.92479e-05	0.000632607	0.0757213	1.46396	0.00327165	0.0613802	0.708517	5.63923e-06	0.00576247	0.0124489	798.756	0.001518
6.2535e-13	1.28639e-12	1.06185e-14	9.85747e-16	2.44309e-17	7.87833e-13	3.44882e-14	7.49541e-14	3.34341e-10	2.16732e-11	1.44216e-12	3.78577e-09	5.81578e-13	3.09551e-08	1.79304e-16	6.47012e-15	7.61377e-13	7.895e-13	1.48453e-10	8.45337e-08	1.96964e-13	2.90261e-12	4.52437e-11	4.33996e-13	1.19224e-14	4.32142e-10	7.05027e-13	2.84007e-13	1.55089e-12	9.53713e-09	9.44486e-09	1.23099e-11	4.68921e-12	8.5849e-11	1921.67	0.000235446	0.000430788	0.000424853	4.69669e-05	0.000500702	0.0797104	1.55461	0.00338993	0.0723357	0.700818	6.63363e-06	0.00566852	0.015532	416.501	0.00164182
6.25669e-13	1.1269e-12	1.06506e-14	1.18904e-15	2.75202e-17	7.52653e-13	3.33728e-14	8.5414e-14	3.81561e-10	2.38562e-11	1.41116e-12	4.29715e-09	6.22257e-13	2.60695e-08	9.82719e-17	6.07094e-15	5.68846e-13	7.833e-13	1.43922e-10	8.6086e-08	3.48756e-13	2.86719e-12	5.07619e-11	4.20065e-13	1.4772e-14	4.56173e-10	6.51919e-13	2.58709e-13	1.4592e-12	9.21209e-09	1.00429e-08	1.1993e-11	4.5765e-12	9.90193e-11	1835.22	0.00023112	0.000443975	0.000556034	3.68639e-05	0.000536155	0.053469	1.59056	0.00239489	0.0618885	0.67564	6.67311e-06	0.00520849	0.0228542	398.979	0.00181335
6.25215e-13	1.34267e-12	1.1384e-14	1.10418e-15	2.18554e-17	7.57579e-13	4.0545e-14	5.7802e-14	2.1726e-10	2.03974e-11	1.41459e-12	3.47066e-09	5.32309e-13	3.04772e-08	1.59722e-16	6.59174e-15	6.81491e-13	7.74899e-13	1.3859e-10	8.8002e-08	9.10413e-14	2.98146e-12	4.16193e-11	4.39087e-13	1.49197e-14	6.25578e-10	7.01216e-13	2.34576e-13	1.44704e-12	7.30798e-09	8.36406e-09	1.09239e-11	4.58422e-12	9.42621e-11	1784.46	0.000234596	0.000455394	0.000406414	4.3971e-05	0.000402334	0.0830979	1.52192	0.00374539	0.0767508	0.68134	7.7319e-06	0.00595561	0.0108258	426.452	0.00194657
6.25544e-13	1.24745e-12	1.34256e-14	1.18881e-15	4.99047e-17	7.30757e-13	3.09641e-14	7.08689e-14	3.08202e-10	2.43653e-11	1.40253e-12	3.70267e-09	6.0068e-13	3.59427e-08	2.16459e-16	5.59787e-15	7.05027e-13	8.2201e-13	1.44054e-10	6.04293e-08	1.88977e-13	2.78205e-12	4.51305e-11	4.41074e-13	1.25723e-14	4.5995e-10	6.96196e-13	2.54612e-13	1.25133e-12	1.01748e-08	1.08183e-08	1.11217e-11	4.04451e-12	8.10664e-11	1954.71	0.000230653	0.000440323	0.000421201	4.59179e-05	0.000567735	0.0856778	1.83227	0.00492985	0.102741	0.542347	5.36439e-06	0.00556602	0.0159999	456.471	0.00139133
6.2535e-13	1.28639e-12	1.06185e-14	9.85747e-16	2.44309e-17	7.87833e-13	3.44882e-14	7.49541e-14	3.34341e-10	2.16732e-11	1.44216e-12	3.78577e-09	5.81578e-13	3.09551e-08	1.79304e-16	6.47012e-15	7.61377e-13	7.895e-13	1.48453e-10	8.45337e-08	1.96964e-13	2.90261e-12	4.52437e-11	4.33996e-13	1.19224e-14	4.32142e-10	7.05027e-13	2.84007e-13	1.55089e-12	9.53713e-09	9.44486e-09	1.23099e-11	4.68921e-12	8.5849e-11	1921.67	0.000235446	0.000430788	0.000424853	4.69669e-05	0.000500702	0.0797104	1.55461	0.00338993	0.0723357	0.700818	6.63363e-06	0.00566852	0.015532	416.501	0.00164182
6.25316e-13	1.29649e-12	1.24493e-14	1.00346e-15	2.36396e-17	7.01711e-13	2.73423e-14	8.65327e-14	3.74493e-10	1.95397e-11	1.41791e-12	4.91533e-09	6.23497e-13	4.30793e-08	1.59709e-16	6.25382e-15	6.72625e-13	8.06467e-13	1.34657e-10	8.18943e-08	2.59993e-13	3.57245e-12	4.64752e-11	4.69048e-13	1.3661e-14	3.81329e-10	7.24226e-13	2.75776e-13	1.56939e-12	9.58718e-09	9.77694e-09	1.17393e-11	5.13299e-12	8.5741e-11	2018.23	0.000231636	0.000450362	0.000441118	4.31235e-05	0.000426512	0.0802981	1.68432	0.00352067	0.082332	0.691591	6.8018e-06	0.00555133	0.0149196	740.47	0.00158106
6.2535e-13	1.28639e-12	1.06185e-14	9.85747e-16	2.44309e-17	7.87833e-13	3.44882e-14	7.49541e-14	3.34341e-10	2.16732e-11	1.44216e-12	3.78577e-09	5.81578e-13	3.09551e-08	1.79304e-16	6.47012e-15	7.61377e-13	7.895e-13	1.48453e-10	8.45337e-08	1.96964e-13	2.90261e-12	4.52437e-11	4.33996e-13	1.19224e-14	4.32142e-10	7.05027e-13	2.84007e-13	1.55089e-12	9.53713e-09	9.44486e-09	1.23099e-11	4.68921e-12	8.5849e-11	1921.67	0.000235446	0.000430788	0.000424853	4.69669e-05	0.000500702	0.0797104	1.55461	0.00338993	0.0723357	0.700818	6.63363e-06	0.00566852	0.015532	416.501	0.00164182
6.2535e-13	1.28639e-12	1.06185e-14	9.85747e-16	2.44309e-17	7.87833e-13	3.44882e-14	7.49541e-14	3.34341e-10	2.16732e-11	1.44216e-12	3.78577e-09	5.81578e-13	3.09551e-08	1.79304e-16	6.47012e-15	7.61377e-13	7.895e-13	1.48453e-10	8.45337e-08	1.96964e-13	2.90261e-12	4.52437e-11	4.33996e-13	1.19224e-14	4.32142e-10	7.05027e-13	2.84007e-13	1.55089e-12	9.53713e-09	9.44486e-09	1.23099e-11	4.68921e-12	8.5849e-11	1921.67	0.000235446	0.000430788	0.000424853	4.69669e-05	0.000500702	0.0797104	1.55461	0.00338993	0.0723357	0.700818	6.63363e-06	0.00566852	0.015532	416.501	0.00164182
6.23264e-13	1.25078e-12	1.08116e-14	9.39866e-16	2.3755e-17	7.42661e-13	3.20325e-14	7.45967e-14	3.14041e-10	2.20828e-11	1.41861e-12	4.0464e-09	5.74091e-13	2.4054e-08	1.61865e-16	6.26565e-15	9.17325e-13	7.96853e-13	1.64358e-10	8.64077e-08	2.42803e-13	2.7493e-12	4.94282e-11	4.18602e-13	1.20371e-14	4.15409e-10	7.2244e-13	2.81076e-13	1.2889e-12	1.10721e-08	9.54796e-09	1.55476e-11	4.32097e-12	8.78577e-11	1423.74	0.000233272	0.000434808	0.00038306	4.73587e-05	0.000565379	0.0753072	1.60204	0.00276874	0.0830455	0.520645	4.39624e-06	0.00594889	0.0141513	379.455	0.00159191
6.24066e-13	1.35904e-12	1.34397e-14	8.89275e-16	1.97218e-17	7.91676e-13	3.21715e-14	6.06093e-14	4.2027e-10	1.66784e-11	1.36253e-12	3.91774e-09	6.31676e-13	3.45393e-08	1.65838e-16	7.14782e-15	8.15444e-13	8.63348e-13	1.35104e-10	8.14165e-08	1.73802e-13	3.2386e-12	5.0566e-11	4.614e-13	9.99167e-15	3.63314e-10	7.27199e-13	1.97264e-13	1.54839e-12	7.30566e-09	8.24843e-09	1.20278e-11	4.57319e-12	8.84066e-11	2057.76	0.000223231	0.000460209	0.000409953	6.10144e-05	0.000475549	0.0706973	1.23898	0.00398684	0.0882632	0.477292	5.9884e-06	0.00583673	0.0188899	422.7	0.00205147
6.25556e-13	1.32376e-12	1.0668e-14	9.37302e-16	2.1686e-17	8.12736e-13	2.9538e-14	8.93736e-14	3.61488e-10	2.49388e-11	1.40997e-12	5.34498e-09	4.87306e-13	3.79231e-08	1.76394e-16	5.26768e-15	7.21738e-13	8.30651e-13	1.62082e-10	9.03053e-08	2.21481e-13	3.04289e-12	4.77817e-11	4.18152e-13	1.16029e-14	9.39276e-10	6.74473e-13	2.6724e-13	1.61468e-12	9.29648e-09	8.79456e-09	1.20744e-11	4.90546e-12	9.22247e-11	2304.69	0.000238161	0.000436468	0.000449785	4.47293e-05	0.000415746	0.0819507	1.48592	0.00327904	0.0470712	0.68141	9.21724e-06	0.00591215	0.0184733	405.249	0.00163745
6.2535e-13	1.28639e-12	1.06185e-14	9.85747e-16	2.44309e-17	7.87833e-13	3.44882e-14	7.49541e-14	3.34341e-10	2.16732e-11	1.44216e-12	3.78577e-09	5.81578e-13	3.09551e-08	1.79304e-16	6.47012e-15	7.61377e-13	7.895e-13	1.48453e-10	8.45337e-08	1.96964e-13	2.90261e-12	4.52437e-11	4.33996e-13	1.19224e-14	4.32142e-10	7.05027e-13	2.84007e-13	1.55089e-12	9.53713e-09	9.44486e-09	1.23099e-11	4.68921e-12	8.5849e-11	1921.67	0.000235446	0.000430788	0.000424853	4.69669e-05	0.000500702	0.0797104	1.55461	0.00338993	0.0723357	0.700818	6.63363e-06	0.00566852	0.015532	416.501	0.00164182
6.25365e-13	1.22383e-12	1.14797e-14	1.00344e-15	2.43762e-17	7.43038e-13	3.77168e-14	7.63633e-14	2.92328e-10	2.35619e-11	1.42504e-12	4.50533e-09	5.09879e-13	1.70902e-08	1.79633e-16	5.26524e-15	8.07877e-13	7.08014e-13	1.265e-10	9.81159e-08	1.2646e-13	3.90665e-12	4.64218e-11	4.11489e-13	1.23048e-14	4.79868e-10	6.60921e-13	2.73859e-13	1.52542e-12	9.02537e-09	8.6303e-09	1.0114e-11	5.00984e-12	7.10267e-11	1807.06	0.000223046	0.00042929	0.000408429	4.00903e-05	0.000402251	0.0783974	1.69082	0.00372065	0.087454	0.635381	7.02446e-06	0.00566479	0.01627	417.098	0.00176576
6.2535e-13	1.28639e-12	1.06185e-14	9.85747e-16	2.44309e-17	7.87833e-13	3.44882e-14	7.49541e-14	3.34341e-10	2.16732e-11	1.44216e-12	3.78577e-09	5.81578e-13	3.09551e-08	1.79304e-16	6.47012e-15	7.61377e-13	7.895e-13	1.48453e-10	8.45337e-08	1.96964e-13	2.90261e-12	4.52437e-11	4.33996e-13	1.19224e-14	4.32142e-10	7.05027e-13	2.84007e-13	1.55089e-12	9.53713e-09	9.44486e-09	1.23099e-11	4.68921e-12	8.5849e-11	1921.67	0.000235446	0.000430788	0.000424853	4.69669e-05	0.000500702	0.0797104	1.55461	0.00338993	0.0723357	0.700818	6.63363e-06	0.00566852	0.015532	416.501	0.00164182
6.24376e-13	1.29184e-12	1.44671e-14	8.75401e-16	2.10946e-17	7.20858e-13	3.58398e-14	1.01312e-13	3.64844e-10	2.15501e-11	1.40778e-12	3.44762e-09	4.46997e-13	2.3314e-08	1.61571e-16	5.833e-15	7.11522e-13	8.06958e-13	1.52852e-10	9.00162e-08	1.58289e-13	3.59308e-12	4.30874e-11	4.37862e-13	1.16484e-14	4.67056e-10	7.13349e-13	2.94603e-13	1.53337e-12	9.57787e-09	1.07959e-08	1.27101e-11	4.68577e-12	8.29509e-11	1648.29	0.000237318	0.000443944	0.00053796	5.14788e-05	0.000591857	0.0706758	1.34301	0.00330075	0.0746398	0.764537	7.80499e-06	0.00560251	0.0206276	350.257	0.00170377
7.13066e-13	8.43333e-13	1.16859e-14	9.77709e-16	2.75866e-17	7.5436e-13	3.26182e-14	8.23582e-14	3.89911e-10	1.93745e-11	1.38877e-12	4.05585e-09	6.36572e-13	3.04806e-08	1.72147e-16	6.82116e-15	8.16679e-13	7.87521e-13	1.46781e-10	8.5847e-08	2.28501e-13	3.21892e-12	4.70211e-11	4.54247e-13	1.20742e-14	3.78466e-10	6.9819e-13	2.22693e-13	1.39542e-12	9.27094e-09	1.20167e-08	1.20612e-11	4.50118e-12	1.04165e-10	2489.19	0.000222902	0.000487871	0.00043958	5.92654e-05	0.000483429	0.060606	611.712	0.00342779	0.0742449	0.661008	6.37446e-06	0.00719396	0.0139374	285.209	0.00203833
6.25753e-13	9.77949e-13	1.51831e-14	1.00374e-15	3.25642e-17	7.53275e-13	3.60606e-14	8.22103e-14	2.98291e-10	1.82e-11	1.42775e-12	3.65239e-09	4.42512e-13	2.93249e-08	1.77008e-16	4.8489e-15	7.22275e-13	8.99791e-13	1.24176e-10	7.08955e-08	2.76624e-13	3.25007e-12	4.58695e-11	4.35704e-13	1.01748e-14	6.09569e-10	7.70536e-13	2.67125e-13	1.48851e-12	1.00201e-08	1.09362e-08	1.80127e-11	5.24866e-12	8.14192e-11	1830.01	0.000232293	0.000439168	0.000493868	4.83679e-05	0.000525654	0.0917601	604.326	0.00385672	0.0950008	0.916173	5.94464e-06	0.0060675	0.016798	297.025	0.00171623
7.55847e-13	1.02532e-12	1.36005e-14	8.8376e-16	2.70142e-17	7.29346e-13	4.52142e-14	8.59617e-14	3.53695e-10	2.05762e-11	1.42305e-12	4.1563e-09	5.6681e-13	3.02604e-08	1.97552e-16	6.21721e-15	6.62372e-13	7.98368e-13	1.26245e-10	6.73147e-08	2.14808e-13	3.1071e-12	4.32971e-11	4.38403e-13	1.22374e-14	3.25359e-10	7.56663e-13	2.64353e-13	1.41306e-12	1.02539e-08	1.03557e-08	2.15422e-11	5.4127e-12	9.70872e-11	1412.37	0.000219103	0.000443095	0.000289409	5.28149e-05	0.000321489	0.102058	549.399	0.0038443	0.0640701	0.905541	5.9443e-06	0.00617681	0.0188594	385.802	0.00215727
6.24705e-13	1.1518e-12	1.13194e-14	1.01461e-15	2.50683e-17	7.77333e-13	4.00325e-14	6.47079e-14	3.06126e-10	2.26083e-11	1.4083e-12	3.65151e-09	5.47894e-13	3.0106e-08	2.38153e-16	6.3001e-15	8.13405e-13	7.96901e-13	1.4419e-10	9.42113e-08	2.29614e-13	2.99775e-12	4.86047e-11	4.25088e-13	1.09379e-14	4.25335e-10	6.55999e-13	2.50914e-13	1.58919e-12	1.00782e-08	1.00887e-08	1.42957e-11	4.71763e-12	7.64187e-11	1734.88	0.000222851	0.00043997	0.000333096	4.72323e-05	0.000492568	0.0779956	2.25705	0.00310051	0.0640801	0.711653	7.58524e-06	0.00585416	0.0151066	469.583	0.00161594
6.24267e-13	1.31069e-12	1.09305e-14	9.10127e-16	1.71938e-17	7.17063e-13	3.72301e-14	7.05489e-14	3.21171e-10	2.25795e-11	1.39145e-12	3.54151e-09	5.25116e-13	3.13585e-08	2.13929e-16	7.07542e-15	7.77755e-13	9.08e-13	1.75938e-10	9.05146e-08	1.81376e-13	2.70322e-12	4.15815e-11	4.46992e-13	1.0008e-14	3.70401e-10	7.69784e-13	2.30352e-13	1.44432e-12	8.38917e-09	9.73736e-09	1.30038e-11	5.24171e-12	7.2979e-11	1077.62	0.000228027	0.000456176	0.000497582	5.39847e-05	0.000573336	0.0732156	1.35994	0.00260787	0.0848504	0.737833	7.44973e-06	0.00455724	0.0148884	389.948	0.00171558
6.23265e-13	1.33777e-12	1.07906e-14	1.10088e-15	2.49296e-17	7.61066e-13	2.9728e-14	7.86336e-14	3.72052e-10	2.05913e-11	1.38843e-12	4.21097e-09	6.37532e-13	3.34557e-08	2.5962e-16	6.33318e-15	7.58629e-13	8.2331e-13	1.31853e-10	8.92402e-08	2.03158e-13	2.91095e-12	4.35604e-11	4.40495e-13	1.44987e-14	5.0586e-10	7.30092e-13	2.40593e-13	1.46208e-12	1.15974e-08	8.51805e-09	1.37295e-11	4.83505e-12	8.54144e-11	2080.97	0.000237489	0.000457274	0.000408792	5.4141e-05	0.000482225	0.0753045	1.27739	0.00322318	0.0675013	0.652395	6.23682e-06	0.00584798	0.0147416	625.977	0.00172493
6.25186e-13	1.25679e-12	1.07688e-14	1.06723e-15	2.56409e-17	7.77797e-13	4.4025e-14	6.60247e-14	3.03842e-10	2.25451e-11	1.41272e-12	3.2577e-09	6.10858e-13	3.08282e-08	2.29095e-16	7.01717e-15	8.24633e-13	8.29857e-13	1.43927e-10	7.77687e-08	1.9617e-13	2.96697e-12	4.76284e-11	4.28364e-13	1.40458e-14	4.26491e-10	7.50186e-13	2.57703e-13	1.48221e-12	9.93226e-09	9.13413e-09	1.36818e-11	6.31086e-12	1.18586e-10	1668.76	0.000255638	0.000427652	0.000569293	4.65633e-05	0.000762777	0.0737935	1.48443	0.00274692	0.0773648	0.747404	6.47441e-06	0.00574696	0.0150095	298.405	0.00155466
6.25644e-13	1.32023e-12	1.17524e-14	1.09557e-15	2.40261e-17	7.81497e-13	2.75212e-14	8.00653e-14	3.60591e-10	1.69248e-11	1.41041e-12	4.28695e-09	5.5949e-13	2.94841e-08	1.45966e-16	6.80524e-15	7.25307e-13	8.09057e-13	1.22467e-10	8.73982e-08	1.70142e-13	2.46319e-12	4.42854e-11	4.75312e-13	1.37891e-14	3.43065e-10	7.60978e-13	2.5303e-13	1.30557e-12	7.50128e-09	1.05502e-08	1.64451e-11	5.15545e-12	8.59874e-11	1871.07	0.000230221	0.000438128	0.000692549	4.82584e-05	0.000555084	0.0726969	1.29586	0.00354636	0.066652	0.651445	7.76325e-06	0.00570538	0.0142646	414.513	0.00187894
6.22733e-13	1.11829e-12	1.24471e-14	9.92582e-16	2.57207e-17	7.81086e-13	2.89714e-14	7.3505e-14	3.38859e-10	2.21423e-11	1.37487e-12	3.52726e-09	6.01809e-13	2.33048e-08	1.47506e-16	6.88211e-15	7.59461e-13	7.56155e-13	1.1688e-10	9.60281e-08	1.6659e-13	2.81989e-12	5.01606e-11	4.174e-13	1.47437e-14	3.65213e-10	7.85718e-13	2.14024e-13	1.23288e-12	7.461e-09	8.88508e-09	1.08883e-11	3.87298e-12	1.13793e-10	2133.47	0.000223289	0.000448998	0.000300187	3.48066e-05	0.000363694	0.0713251	2.2281	0.0048909	0.0595493	0.943996	6.99723e-06	0.00557125	0.0146135	501.351	0.00144647
6.2535e-13	1.28639e-12	1.06185e-14	9.85747e-16	2.44309e-17	7.87833e-13	3.44882e-14	7.49541e-14	3.34341e-10	2.16732e-11	1.44216e-12	3.78577e-09	5.81578e-13	3.09551e-08	1.79304e-16	6.47012e-15	7.61377e-13	7.895e-13	1.48453e-10	8.45337e-08	1.96964e-13	2.90261e-12	4.52437e-11	4.33996e-13	1.19224e-14	4.32142e-10	7.05027e-13	2.84007e-13	1.55089e-12	9.53713e-09	9.44486e-09	1.23099e-11	4.68921e-12	8.5849e-11	1921.67	0.000235446	0.000430788	0.000424853	4.69669e-05	0.000500702	0.0797104	1.55461	0.00338993	0.0723357	0.700818	6.63363e-06	0.00566852	0.015532	416.501	0.00164182
6.2535e-13	1.28639e-12	1.06185e-14	9.85747e-16	2.44309e-17	7.87833e-13	3.44882e-14	7.49541e-14	3.34341e-10	2.16732e-11	1.44216e-12	3.78577e-09	5.81578e-13	3.09551e-08	1.79304e-16	6.47012e-15	7.61377e-13	7.895e-13	1.48453e-10	8.45337e-08	1.96964e-13	2.90261e-12	4.52437e-11	4.33996e-13	1.19224e-14	4.32142e-10	7.05027e-13	2.84007e-13	1.55089e-12	9.53713e-09	9.44486e-09	1.23099e-11	4.68921e-12	8.5849e-11	1921.67	0.000235446	0.000430788	0.000424853	4.69669e-05	0.000500702	0.0797104	1.55461	0.00338993	0.0723357	0.700818	6.63363e-06	0.00566852	0.015532	416.501	0.00164182
6.21279e-13	1.43243e-12	1.07201e-14	9.47284e-16	6.26634e-17	8.46286e-13	3.20479e-14	8.31483e-14	2.99705e-10	2.47545e-11	1.40891e-12	3.65205e-09	4.97335e-13	2.65905e-08	1.30184e-16	5.81685e-15	6.22053e-13	8.13184e-13	1.42151e-10	9.06118e-08	2.71966e-13	3.12959e-12	4.29269e-11	4.09267e-13	9.9212e-15	4.67539e-10	6.53048e-13	2.7884e-13	1.50214e-12	8.82158e-09	9.17323e-09	1.40952e-11	3.84333e-12	6.79201e-11	2194.52	0.000227811	0.000448006	0.000319872	5.64481e-05	0.000403201	0.0763423	1.27545	0.00313824	0.0745281	0.630504	7.13832e-06	0.00746028	0.0151509	428.414	0.00147824
6.25572e-13	1.28998e-12	1.17295e-14	8.96171e-16	1.97607e-17	7.60839e-13	2.2061e-14	7.73671e-14	3.44378e-10	1.93678e-11	1.43715e-12	4.55689e-09	5.47813e-13	2.97121e-08	1.93019e-16	6.57007e-15	7.20349e-13	8.09574e-13	1.60921e-10	8.42235e-08	2.06298e-13	2.78819e-12	4.9773e-11	4.31765e-13	1.12206e-14	4.45203e-10	7.15167e-13	2.7939e-13	1.36121e-12	1.04805e-08	8.38585e-09	1.32425e-11	5.20699e-12	7.73063e-11	2191.66	0.000240091	0.000439229	0.00038873	4.52595e-05	0.000508485	0.073236	1.48473	0.00333583	0.0704103	0.715711	6.05977e-06	0.00631697	0.0168532	526.496	0.00152875
6.2535e-13	1.28639e-12	1.06185e-14	9.85747e-16	2.44309e-17	7.87833e-13	3.44882e-14	7.49541e-14	3.34341e-10	2.16732e-11	1.44216e-12	3.78577e-09	5.81578e-13	3.09551e-08	1.79304e-16	6.47012e-15	7.61377e-13	7.895e-13	1.48453e-10	8.45337e-08	1.96964e-13	2.90261e-12	4.52437e-11	4.33996e-13	1.19224e-14	4.32142e-10	7.05027e-13	2.84007e-13	1.55089e-12	9.53713e-09	9.44486e-09	1.23099e-11	4.68921e-12	8.5849e-11	1921.67	0.000235446	0.000430788	0.000424853	4.69669e-05	0.000500702	0.0797104	1.55461	0.00338993	0.0723357	0.700818	6.63363e-06	0.00566852	0.015532	416.501	0.00164182
6.2535e-13	1.28639e-12	1.06185e-14	9.85747e-16	2.44309e-17	7.87833e-13	3.44882e-14	7.49541e-14	3.34341e-10	2.16732e-11	1.44216e-12	3.78577e-09	5.81578e-13	3.09551e-08	1.79304e-16	6.47012e-15	7.61377e-13	7.895e-13	1.48453e-10	8.45337e-08	1.96964e-13	2.90261e-12	4.52437e-11	4.33996e-13	1.19224e-14	4.32142e-10	7.05027e-13	2.84007e-13	1.55089e-12	9.53713e-09	9.44486e-09	1.23099e-11	4.68921e-12	8.5849e-11	1921.67	0.000235446	0.000430788	0.000424853	4.69669e-05	0.000500702	0.0797104	1.55461	0.00338993	0.0723357	0.700818	6.63363e-06	0.00566852	0.015532	416.501	0.00164182
6.23683e-13	1.23716e-12	1.09088e-14	8.70775e-16	2.82178e-17	7.6159e-13	4.21812e-14	6.74357e-14	3.09572e-10	1.90169e-11	1.36089e-12	3.79479e-09	6.64835e-13	2.93357e-08	1.72547e-16	7.34582e-15	6.50287e-13	8.49021e-13	1.33107e-10	7.93878e-08	2.14668e-13	3.43319e-12	4.41232e-11	4.57389e-13	1.33177e-14	3.96082e-10	7.46987e-13	2.13909e-13	1.3259e-12	1.38808e-08	1.13056e-08	1.23244e-11	4.8684e-12	8.99555e-11	2182.4	0.000220783	0.000442527	0.000397998	4.72318e-05	0.000471555	0.0688887	1.64944	0.00362435	0.0707658	0.589119	6.3367e-06	0.00566189	0.0147971	379.678	0.00180546
6.25143e-13	1.29094e-12	1.08118e-14	8.51698e-16	2.24628e-17	7.7958e-13	3.72291e-14	6.26171e-14	2.95634e-10	2.1083e-11	1.41694e-12	3.54762e-09	6.55163e-13	2.62981e-08	1.61898e-16	6.31362e-15	7.57549e-13	7.35888e-13	1.3896e-10	9.07005e-08	1.99931e-13	2.76217e-12	5.45113e-11	4.30401e-13	1.13541e-14	4.29136e-10	6.84584e-13	2.56555e-13	1.28414e-12	1.02773e-08	1.04662e-08	1.2454e-11	3.67586e-12	8.02414e-11	2547.45	0.000223464	0.000443374	0.00041891	7.08565e-05	0.000523727	0.0717795	1.4395	0.00399349	0.0651439	0.652013	7.08252e-06	0.00570091	0.0173528	419.389	0.0015454
6.21334e-13	1.39873e-12	1.39825e-14	8.56135e-16	2.32478e-17	7.48565e-13	3.68253e-14	8.5254e-14	3.74321e-10	2.01246e-11	1.41442e-12	3.38558e-09	5.76835e-13	2.86602e-08	1.61109e-16	6.00015e-15	7.1304e-13	8.11826e-13	1.52993e-10	6.49466e-08	2.28633e-13	3.31687e-12	5.19471e-11	4.17314e-13	9.82827e-15	4.73685e-10	7.7491e-13	2.87366e-13	1.45776e-12	9.71122e-09	8.8023e-09	1.24656e-11	5.77587e-12	8.27868e-11	1997.63	0.000243684	0.000443835	0.000470918	3.94157e-05	0.000611294	0.0966809	1.49956	0.00432519	0.0678189	0.665022	6.18765e-06	0.00520668	0.0156512	398.284	0.00160908
6.2535e-13	1.28639e-12	1.06185e-14	9.85747e-16	2.44309e-17	7.87833e-13	3.44882e-14	7.49541e-14	3.34341e-10	2.16732e-11	1.44216e-12	3.78577e-09	5.81578e-13	3.09551e-08	1.79304e-16	6.47012e-15	7.61377e-13	7.895e-13	1.48453e-10	8.45337e-08	1.96964e-13	2.90261e-12	4.52437e-11	4.33996e-13	1.19224e-14	4.32142e-10	7.05027e-13	2.84007e-13	1.55089e-12	9.53713e-09	9.44486e-09	1.23099e-11	4.68921e-12	8.5849e-11	1921.67	0.000235446	0.000430788	0.000424853	4.69669e-05	0.000500702	0.0797104	1.55461	0.00338993	0.0723357	0.700818	6.63363e-06	0.00566852	0.015532	416.501	0.00164182
6.2535e-13	1.28639e-12	1.06185e-14	9.85747e-16	2.44309e-17	7.87833e-13	3.44882e-14	7.49541e-14	3.34341e-10	2.16732e-11	1.44216e-12	3.78577e-09	5.81578e-13	3.09551e-08	1.79304e-16	6.47012e-15	7.61377e-13	7.895e-13	1.48453e-10	8.45337e-08	1.96964e-13	2.90261e-12	4.52437e-11	4.33996e-13	1.19224e-14	4.32142e-10	7.05027e-13	2.84007e-13	1.55089e-12	9.53713e-09	9.44486e-09	1.23099e-11	4.68921e-12	8.5849e-11	1921.67	0.000235446	0.000430788	0.000424853	4.69669e-05	0.000500702	0.0797104	1.55461	0.00338993	0.0723357	0.700818	6.63363e-06	0.00566852	0.015532	416.501	0.00164182
6.25727e-13	1.27739e-12	1.3246e-14	1.1208e-15	1.99533e-17	7.32218e-13	3.61755e-14	7.95762e-14	2.89801e-10	2.58964e-11	1.34739e-12	3.86229e-09	6.16973e-13	3.08798e-08	1.01834e-16	6.49981e-15	4.2137e-13	8.04221e-13	1.63322e-10	9.29192e-08	1.92876e-13	3.74046e-12	4.56968e-11	4.47557e-13	1.08677e-14	4.9551e-10	7.40388e-13	2.01053e-13	1.31299e-12	9.44166e-09	8.2261e-09	1.19329e-11	3.98503e-12	1.07949e-10	1633.96	0.000226934	0.000457532	0.000446957	5.10852e-05	0.00045395	0.0796095	1.5959	0.00316627	0.0740319	0.670451	7.45222e-06	0.00404399	0.014345	451.127	0.00171203
6.25544e-13	1.17191e-12	1.19387e-14	8.47226e-16	2.40258e-17	7.65944e-13	4.15436e-14	5.95358e-14	3.12527e-10	2.29953e-11	1.43007e-12	3.18241e-09	6.95466e-13	3.65051e-08	2.00742e-16	7.49171e-15	7.06883e-13	7.82251e-13	1.12979e-10	9.42969e-08	1.8823e-13	3.61503e-12	4.44472e-11	4.09566e-13	1.01404e-14	4.80127e-10	7.11159e-13	2.59985e-13	1.40531e-12	9.37091e-09	9.79692e-09	1.08474e-11	4.57616e-12	8.92743e-11	2092.12	0.000229166	0.000446622	0.000406743	4.45479e-05	0.000450182	0.0568421	1.56604	0.00305413	0.0779618	0.785641	6.43324e-06	0.00588344	0.0152576	195.748	0.00149295
6.25301e-13	1.21445e-12	1.08061e-14	8.50101e-16	2.49547e-17	7.46063e-13	2.98351e-14	7.59924e-14	3.45422e-10	2.44097e-11	1.40563e-12	3.7528e-09	5.64741e-13	2.40036e-08	2.07938e-16	6.04693e-15	6.4477e-13	7.97841e-13	1.12273e-10	7.11977e-08	2.51398e-13	2.97038e-12	4.59801e-11	4.4401e-13	1.03354e-14	4.6031e-10	6.93572e-13	2.46374e-13	1.51633e-12	5.48959e-09	9.93774e-09	1.44894e-11	5.40512e-12	1.04658e-10	1650.96	0.000236977	0.000422359	0.000443202	6.16809e-05	0.000672094	0.0780759	1.92859	0.00407634	0.0761563	0.764845	5.65876e-06	0.0055591	0.0171078	427.453	0.00148529
6.25447e-13	1.30117e-12	1.19929e-14	9.0328e-16	2.61561e-17	7.90356e-13	3.14796e-14	9.368e-14	3.32783e-10	1.56811e-11	1.39003e-12	4.6411e-09	5.24378e-13	4.82026e-08	1.41119e-16	6.74527e-15	7.73699e-13	8.2782e-13	1.43697e-10	8.6107e-08	2.13067e-13	3.59365e-12	4.3875e-11	4.39492e-13	1.14246e-14	4.00068e-10	7.25257e-13	2.58738e-13	1.45104e-12	7.96593e-09	9.49501e-09	1.01535e-11	4.90296e-12	1.41454e-10	1943.28	0.000241398	0.000434055	0.000313225	7.32537e-05	0.00054875	0.091743	1.58559	0.0036011	0.0738589	0.622883	7.84621e-06	0.00728431	0.0159684	365.255	0.00163735
6.25421e-13	1.33301e-12	1.09333e-14	9.47173e-16	2.19144e-17	7.54414e-13	3.43831e-14	7.63339e-14	3.85331e-10	1.28434e-11	1.41473e-12	4.95362e-09	5.77977e-13	4.43806e-08	2.44735e-16	5.8676e-15	5.25775e-13	7.71444e-13	1.49833e-10	7.75732e-08	2.5616e-13	2.90161e-12	4.28952e-11	4.16539e-13	1.4572e-14	4.55019e-10	6.64376e-13	2.7482e-13	1.54593e-12	1.0894e-08	9.13152e-09	1.57767e-11	5.28112e-12	1.31652e-10	1409.46	0.000226546	0.00044934	0.000457947	4.5487e-05	0.000561563	0.0846937	1.53439	0.00338142	0.0798603	0.53161	1.08347e-05	0.00552406	0.0159361	447.012	0.00154436
6.25631e-13	1.23586e-12	1.05855e-14	1.10085e-15	3.34302e-17	7.85891e-13	3.69083e-14	7.0749e-14	2.83953e-10	2.37377e-11	1.43219e-12	3.45449e-09	4.45305e-13	3.81466e-08	1.51765e-16	5.39583e-15	8.54947e-13	7.80234e-13	1.78523e-10	8.14598e-08	1.60755e-13	3.31458e-12	4.02117e-11	4.56147e-13	1.28734e-14	4.97773e-10	7.36942e-13	2.7674e-13	1.56931e-12	8.18628e-09	1.23282e-08	1.16041e-11	4.94147e-12	8.54144e-11	1821.27	0.000230698	0.000431489	0.000440836	4.71119e-05	0.000531111	0.0800677	1.76309	0.00296128	0.0693727	0.731384	5.64367e-06	0.00619957	0.0148046	430.685	0.0014771
6.25314e-13	1.25648e-12	1.04531e-14	1.16892e-15	2.54471e-17	8.2668e-13	4.89224e-14	7.25642e-14	3.42068e-10	2.39455e-11	1.40017e-12	4.83327e-09	6.41063e-13	2.5405e-08	2.0373e-16	6.80516e-15	6.15066e-13	8.12524e-13	1.2846e-10	9.8118e-08	1.99169e-13	3.59204e-12	4.73709e-11	4.70765e-13	1.23071e-14	4.81065e-10	7.15637e-13	2.69357e-13	1.49819e-12	9.69686e-09	7.95532e-09	1.23513e-11	4.21866e-12	6.60805e-11	1836.91	0.000225401	0.000428713	0.000472815	5.38687e-05	0.000620425	0.0684313	1.52273	0.00224702	0.0920735	0.55122	6.72807e-06	0.00725786	0.0203405	468.757	0.00156322
6.25468e-13	1.31871e-12	1.10045e-14	1.06977e-15	3.75552e-17	7.33035e-13	3.8235e-14	6.61002e-14	2.46229e-10	2.56675e-11	1.40649e-12	4.92768e-09	6.09262e-13	3.94059e-08	2.17109e-16	6.53174e-15	8.78108e-13	8.43373e-13	1.83377e-10	9.09175e-08	2.35251e-13	3.48721e-12	4.34726e-11	4.15186e-13	9.68819e-15	5.80704e-10	6.90235e-13	2.30042e-13	1.34498e-12	1.27552e-08	1.13688e-08	2.02166e-11	4.90844e-12	9.79065e-11	1882.76	0.000228973	0.000430046	0.000345247	4.38029e-05	0.000526844	0.0631061	1.21568	0.00414316	0.0702481	0.87384	5.01865e-06	0.00481661	0.0114111	318.841	0.00169812
6.25115e-13	1.30517e-12	1.09269e-14	1.00009e-15	2.71359e-17	7.90583e-13	3.44967e-14	6.84454e-14	2.78754e-10	2.2329e-11	1.44697e-12	4.13559e-09	6.2317e-13	2.59361e-08	1.66957e-16	6.79441e-15	7.58668e-13	7.83276e-13	1.35674e-10	7.77644e-08	2.19654e-13	2.75976e-12	5.30994e-11	4.2867e-13	1.2298e-14	6.01786e-10	7.02118e-13	2.73358e-13	1.74107e-12	1.04146e-08	1.01512e-08	1.09806e-11	4.55885e-12	7.99294e-11	2474.39	0.000261863	0.000473109	0.000420747	5.08257e-05	0.000338286	0.0807942	1.47395	0.00350611	0.0689712	0.638988	6.78046e-06	0.00507485	0.0175399	328.13	0.00187098
6.24567e-13	1.39164e-12	1.34157e-14	1.07369e-15	2.78371e-17	7.83909e-13	3.39278e-14	6.94403e-14	3.34553e-10	2.19519e-11	1.38653e-12	4.18349e-09	5.68651e-13	2.76464e-08	2.2414e-16	5.7907e-15	8.01765e-13	7.38463e-13	1.48767e-10	8.31476e-08	1.48736e-13	2.90195e-12	4.49058e-11	4.24395e-13	1.29758e-14	3.55523e-10	6.74137e-13	2.45032e-13	1.5867e-12	9.14962e-09	9.87469e-09	1.15011e-11	5.92087e-12	6.92034e-11	1831.01	0.000226526	0.000419957	0.000435984	4.41082e-05	0.000501667	0.0897097	1.43537	0.00204205	0.073357	0.607642	7.07517e-06	0.00565111	0.0151907	342.097	0.00148166
6.2535e-13	1.28639e-12	1.06185e-14	9.85747e-16	2.44309e-17	7.87833e-13	3.44882e-14	7.49541e-14	3.34341e-10	2.16732e-11	1.44216e-12	3.78577e-09	5.81578e-13	3.09551e-08	1.79304e-16	6.47012e-15	7.61377e-13	7.895e-13	1.48453e-10	8.45337e-08	1.96964e-13	2.90261e-12	4.52437e-11	4.33996e-13	1.19224e-14	4.32142e-10	7.05027e-13	2.84007e-13	1.55089e-12	9.53713e-09	9.44486e-09	1.23099e-11	4.68921e-12	8.5849e-11	1921.67	0.000235446	0.000430788	0.000424853	4.69669e-05	0.000500702	0.0797104	1.55461	0.00338993	0.0723357	0.700818	6.63363e-06	0.00566852	0.015532	416.501	0.00164182
6.2535e-13	1.28639e-12	1.06185e-14	9.85747e-16	2.44309e-17	7.87833e-13	3.44882e-14	7.49541e-14	3.34341e-10	2.16732e-11	1.44216e-12	3.78577e-09	5.81578e-13	3.09551e-08	1.79304e-16	6.47012e-15	7.61377e-13	7.895e-13	1.48453e-10	8.45337e-08	1.96964e-13	2.90261e-12	4.52437e-11	4.33996e-13	1.19224e-14	4.32142e-10	7.05027e-13	2.84007e-13	1.55089e-12	9.53713e-09	9.44486e-09	1.23099e-11	4.68921e-12	8.5849e-11	1921.67	0.000235446	0.000430788	0.000424853	4.69669e-05	0.000500702	0.0797104	1.55461	0.00338993	0.0723357	0.700818	6.63363e-06	0.00566852	0.015532	416.501	0.00164182
6.2532e-13	1.12877e-12	1.62391e-14	1.04467e-15	2.23674e-17	7.91518e-13	2.9907e-14	8.06498e-14	3.20666e-10	2.37281e-11	1.35898e-12	4.35055e-09	5.91125e-13	3.08912e-08	1.80178e-16	6.95215e-15	7.72968e-13	7.76219e-13	1.17491e-10	7.51121e-08	1.46348e-13	3.0777e-12	4.21273e-11	4.29549e-13	1.13833e-14	3.95558e-10	6.96531e-13	2.26996e-13	1.89066e-12	1.13361e-08	9.32135e-09	1.06788e-11	5.18835e-12	9.55281e-11	1866.56	0.00022021	0.00046162	0.00044227	4.20339e-05	0.000439148	0.0666011	1.99261	0.00317285	0.078715	0.598864	6.51868e-06	0.00654975	0.0150359	229.02	0.00156223
6.25062e-13	1.27555e-12	1.23599e-14	9.9337e-16	2.06616e-17	7.46161e-13	2.97777e-14	6.09119e-14	2.80152e-10	2.13263e-11	1.41938e-12	3.619e-09	5.8445e-13	4.48831e-08	1.57196e-16	6.84556e-15	6.13538e-13	7.93337e-13	1.36119e-10	8.02838e-08	1.74687e-13	2.44454e-12	4.75131e-11	4.474e-13	1.22661e-14	3.44097e-10	7.04092e-13	2.2328e-13	1.5097e-12	7.00554e-09	9.17888e-09	1.05827e-11	5.32756e-12	8.50272e-11	2513.47	0.000229513	0.000449504	0.000382907	4.63366e-05	0.000409184	0.0855881	1.65885	0.00352914	0.100012	0.714176	6.79664e-06	0.00538024	0.014947	437.334	0.00198118
6.2535e-13	1.28639e-12	1.06185e-14	9.85747e-16	2.44309e-17	7.87833e-13	3.44882e-14	7.49541e-14	3.34341e-10	2.16732e-11	1.44216e-12	3.78577e-09	5.81578e-13	3.09551e-08	1.79304e-16	6.47012e-15	7.61377e-13	7.895e-13	1.48453e-10	8.45337e-08	1.96964e-13	2.90261e-12	4.52437e-11	4.33996e-13	1.19224e-14	4.32142e-10	7.05027e-13	2.84007e-13	1.55089e-12	9.53713e-09	9.44486e-09	1.23099e-11	4.68921e-12	8.5849e-11	1921.67	0.000235446	0.000430788	0.000424853	4.69669e-05	0.000500702	0.0797104	1.55461	0.00338993	0.0723357	0.700818	6.63363e-06	0.00566852	0.015532	416.501	0.00164182
6.2535e-13	1.28639e-12	1.06185e-14	9.85747e-16	2.44309e-17	7.87833e-13	3.44882e-14	7.49541e-14	3.34341e-10	2.16732e-11	1.44216e-12	3.78577e-09	5.81578e-13	3.09551e-08	1.79304e-16	6.47012e-15	7.61377e-13	7.895e-13	1.48453e-10	8.45337e-08	1.96964e-13	2.90261e-12	4.52437e-11	4.33996e-13	1.19224e-14	4.32142e-10	7.05027e-13	2.84007e-13	1.55089e-12	9.53713e-09	9.44486e-09	1.23099e-11	4.68921e-12	8.5849e-11	1921.67	0.000235446	0.000430788	0.000424853	4.69669e-05	0.000500702	0.0797104	1.55461	0.00338993	0.0723357	0.700818	6.63363e-06	0.00566852	0.015532	416.501	0.00164182
6.25167e-13	1.34984e-12	1.11457e-14	1.13965e-15	2.52213e-17	7.53539e-13	2.95558e-14	6.90126e-14	2.55911e-10	2.39228e-11	1.40674e-12	3.89224e-09	6.12523e-13	2.84693e-08	1.69906e-16	6.96181e-15	6.47243e-13	7.97188e-13	1.52554e-10	7.12248e-08	2.44497e-13	2.72715e-12	4.8514e-11	4.53349e-13	1.09757e-14	3.43577e-10	7.29882e-13	2.35777e-13	1.65746e-12	9.08812e-09	1.00624e-08	1.18552e-11	5.17568e-12	7.96932e-11	1664.77	0.000232015	0.000439571	0.000395272	3.71889e-05	0.000529895	0.0736463	1.299	0.00352532	0.0691392	0.711024	5.94812e-06	0.00519397	0.0166524	689.035	0.00181388
6.24685e-13	1.21679e-12	1.52889e-14	1.01404e-15	1.91205e-17	7.06152e-13	3.78488e-14	8.009e-14	4.1171e-10	2.90617e-11	1.38746e-12	3.64731e-09	6.37096e-13	3.18048e-08	1.47415e-16	6.35901e-15	8.72519e-13	7.84451e-13	1.58543e-10	8.90962e-08	1.93294e-13	2.90021e-12	4.94393e-11	4.11904e-13	1.09433e-14	4.58267e-10	6.86449e-13	2.63595e-13	1.46601e-12	7.40227e-09	7.99239e-09	1.38006e-11	5.06388e-12	9.69456e-11	1799.59	0.000240624	0.00044938	0.000401736	5.22234e-05	0.000467166	0.0793687	1.91209	0.00374891	0.08308	0.603484	7.46307e-06	0.00554756	0.0233684	361.797	0.0015649
6.25443e-13	1.28064e-12	1.23768e-14	1.09815e-15	2.79551e-17	7.5953e-13	4.16073e-14	8.5192e-14	3.50457e-10	2.10938e-11	1.41917e-12	3.45642e-09	7.58221e-13	2.81817e-08	1.18984e-16	6.57049e-15	7.91183e-13	7.95236e-13	1.34203e-10	9.21661e-08	1.67864e-13	3.4364e-12	4.53609e-11	4.4111e-13	1.38e-14	3.03932e-10	7.65418e-13	2.82986e-13	1.59444e-12	9.81993e-09	1.02122e-08	1.32651e-11	5.04533e-12	8.9758e-11	2089.59	0.000231671	0.000452952	0.00030962	4.15926e-05	0.000520274	0.0643481	1.34028	0.003825	0.0837726	0.684468	6.40613e-06	0.00641082	0.0160551	368.776	0.00170423
6.25447e-13	1.29084e-12	1.41031e-14	1.14979e-15	2.94041e-17	8.37702e-13	3.6303e-14	8.22175e-14	4.1578e-10	3.07656e-11	1.37344e-12	3.82823e-09	6.36922e-13	2.78291e-08	1.65556e-16	7.53504e-15	9.46753e-13	8.18302e-13	1.51109e-10	8.29214e-08	1.63034e-13	3.44825e-12	4.82254e-11	4.35807e-13	1.66707e-14	3.19357e-10	6.90074e-13	2.27627e-13	1.54333e-12	7.61517e-09	8.31695e-09	1.24342e-11	4.52446e-12	8.29683e-11	1447.71	0.000248161	0.000431581	0.000470952	3.99131e-05	0.000524247	0.081866	1.65369	0.00275782	0.0750243	0.645457	4.6743e-06	0.0072423	0.0159404	451.465	0.00200664
6.2535e-13	1.28639e-12	1.06185e-14	9.85747e-16	2.44309e-17	7.87833e-13	3.44882e-14	7.49541e-14	3.34341e-10	2.16732e-11	1.44216e-12	3.78577e-09	5.81578e-13	3.09551e-08	1.79304e-16	6.47012e-15	7.61377e-13	7.895e-13	1.48453e-10	8.45337e-08	1.96964e-13	2.90261e-12	4.52437e-11	4.33996e-13	1.19224e-14	4.32142e-10	7.05027e-13	2.84007e-13	1.55089e-12	9.53713e-09	9.44486e-09	1.23099e-11	4.68921e-12	8.5849e-11	1921.67	0.000235446	0.000430788	0.000424853	4.69669e-05	0.000500702	0.0797104	1.55461	0.00338993	0.0723357	0.700818	6.63363e-06	0.00566852	0.015532	416.501	0.00164182
6.25359e-13	1.16303e-12	1.08758e-14	9.72997e-16	2.7779e-17	8.12932e-13	3.6859e-14	6.22051e-14	3.2842e-10	2.09583e-11	1.44361e-12	3.46812e-09	7.37331e-13	2.98893e-08	1.71184e-16	6.91181e-15	7.24728e-13	7.79775e-13	1.38597e-10	8.14097e-08	1.99745e-13	2.56727e-12	4.73176e-11	4.25046e-13	1.26928e-14	3.61948e-10	6.97679e-13	2.62734e-13	1.57931e-12	1.07512e-08	1.18418e-08	1.46165e-11	4.51948e-12	8.117e-11	2123.39	0.000231441	0.000445089	0.00031768	4.35567e-05	0.000494362	0.0562643	1.59812	0.00283162	0.0598861	0.717095	5.69846e-06	0.00759801	0.0159414	381.341	0.00188385
6.2535e-13	1.28639e-12	1.06185e-14	9.85747e-16	2.44309e-17	7.87833e-13	3.44882e-14	7.49541e-14	3.34341e-10	2.16732e-11	1.44216e-12	3.78577e-09	5.81578e-13	3.09551e-08	1.79304e-16	6.47012e-15	7.61377e-13	7.895e-13	1.48453e-10	8.45337e-08	1.96964e-13	2.90261e-12	4.52437e-11	4.33996e-13	1.19224e-14	4.32142e-10	7.05027e-13	2.84007e-13	1.55089e-12	9.53713e-09	9.44486e-09	1.23099e-11	4.68921e-12	8.5849e-11	1921.67	0.000235446	0.000430788	0.000424853	4.69669e-05	0.000500702	0.0797104	1.55461	0.00338993	0.0723357	0.700818	6.63363e-06	0.00566852	0.015532	416.501	0.00164182
6.21345e-13	1.20694e-12	1.20809e-14	1.02707e-15	2.76168e-17	7.69515e-13	3.78945e-14	6.94019e-14	2.98706e-10	2.57507e-11	1.4031e-12	4.20133e-09	4.87191e-13	3.29792e-08	1.3982e-16	6.72553e-15	7.90704e-13	8.3785e-13	1.58365e-10	9.55694e-08	1.69958e-13	3.08725e-12	4.62727e-11	4.52061e-13	1.36261e-14	4.80002e-10	7.27279e-13	2.81212e-13	1.64208e-12	1.04461e-08	9.77173e-09	1.65123e-11	4.50636e-12	1.39467e-10	1928.08	0.000221539	0.000447802	0.000401456	5.58655e-05	0.000723548	0.0658583	1.57792	0.00290025	0.0649261	0.493773	7.83657e-06	0.00550151	0.0146167	412.322	0.00131808
6.21339e-13	1.39726e-12	1.10525e-14	1.02893e-15	2.32151e-17	8.35745e-13	3.01158e-14	5.1248e-14	3.58649e-10	2.41259e-11	1.41997e-12	3.6081e-09	5.45233e-13	3.12606e-08	1.61306e-16	5.82484e-15	5.59567e-13	8.12245e-13	1.67539e-10	8.34874e-08	1.47939e-13	3.06633e-12	4.71738e-11	4.44125e-13	1.23912e-14	4.13499e-10	7.7473e-13	2.43677e-13	1.77742e-12	8.52032e-09	9.07398e-09	1.02666e-11	5.2573e-12	1.0217e-10	2687.5	0.000227265	0.000421761	0.000665739	4.62364e-05	0.000643356	0.0822255	1.2454	0.00350249	0.062734	0.492465	4.93002e-06	0.00647134	0.0243543	820.313	0.00177452
6.2535e-13	1.28639e-12	1.06185e-14	9.85747e-16	2.44309e-17	7.87833e-13	3.44882e-14	7.49541e-14	3.34341e-10	2.16732e-11	1.44216e-12	3.78577e-09	5.81578e-13	3.09551e-08	1.79304e-16	6.47012e-15	7.61377e-13	7.895e-13	1.48453e-10	8.45337e-08	1.96964e-13	2.90261e-12	4.52437e-11	4.33996e-13	1.19224e-14	4.32142e-10	7.05027e-13	2.84007e-13	1.55089e-12	9.53713e-09	9.44486e-09	1.23099e-11	4.68921e-12	8.5849e-11	1921.67	0.000235446	0.000430788	0.000424853	4.69669e-05	0.000500702	0.0797104	1.55461	0.00338993	0.0723357	0.700818	6.63363e-06	0.00566852	0.015532	416.501	0.00164182
6.2535e-13	1.28639e-12	1.06185e-14	9.85747e-16	2.44309e-17	7.87833e-13	3.44882e-14	7.49541e-14	3.34341e-10	2.16732e-11	1.44216e-12	3.78577e-09	5.81578e-13	3.09551e-08	1.79304e-16	6.47012e-15	7.61377e-13	7.895e-13	1.48453e-10	8.45337e-08	1.96964e-13	2.90261e-12	4.52437e-11	4.33996e-13	1.19224e-14	4.32142e-10	7.05027e-13	2.84007e-13	1.55089e-12	9.53713e-09	9.44486e-09	1.23099e-11	4.68921e-12	8.5849e-11	1921.67	0.000235446	0.000430788	0.000424853	4.69669e-05	0.000500702	0.0797104	1.55461	0.00338993	0.0723357	0.700818	6.63363e-06	0.00566852	0.015532	416.501	0.00164182
6.25232e-13	1.35813e-12	1.10221e-14	1.0242e-15	2.22312e-17	8.07389e-13	2.36939e-14	6.5721e-14	3.44737e-10	2.02461e-11	1.44219e-12	3.45854e-09	5.1056e-13	2.6581e-08	1.67036e-16	5.13258e-15	9.40168e-13	8.28872e-13	1.57368e-10	9.38631e-08	1.51101e-13	2.83614e-12	4.56397e-11	4.96044e-13	1.08129e-14	5.0515e-10	8.25755e-13	2.69344e-13	1.82101e-12	1.61177e-08	1.10924e-08	1.6786e-11	5.39007e-12	9.66004e-11	2217.37	0.000222105	0.000447923	0.000348567	3.75611e-05	0.000512816	0.0754289	1.33431	0.0031695	0.0850249	0.71518	6.93962e-06	0.00673246	0.0155187	361.346	0.00147082
6.25568e-13	1.23855e-12	1.30726e-14	8.6271e-16	2.77122e-17	8.35508e-13	4.65195e-14	6.77561e-14	3.66412e-10	2.03227e-11	1.39085e-12	4.07633e-09	6.47094e-13	3.99342e-08	1.94636e-16	6.33423e-15	7.13597e-13	8.27083e-13	1.72228e-10	8.42489e-08	3.3588e-13	2.84727e-12	4.70993e-11	4.52105e-13	1.27504e-14	5.76267e-10	7.35966e-13	2.49513e-13	1.33239e-12	1.12854e-08	1.04521e-08	1.09837e-11	4.34026e-12	9.90909e-11	1620.16	0.000235611	0.000447046	0.00043241	6.18121e-05	0.000636088	0.0586212	1.35601	0.00329856	0.0541824	0.524246	4.38483e-06	0.00658475	0.0157322	455.923	0.00173466
6.2535e-13	1.28639e-12	1.06185e-14	9.85747e-16	2.44309e-17	7.87833e-13	3.44882e-14	7.49541e-14	3.34341e-10	2.16732e-11	1.44216e-12	3.78577e-09	5.81578e-13	3.09551e-08	1.79304e-16	6.47012e-15	7.61377e-13	7.895e-13	1.48453e-10	8.45337e-08	1.96964e-13	2.90261e-12	4.52437e-11	4.33996e-13	1.19224e-14	4.32142e-10	7.05027e-13	2.84007e-13	1.55089e-12	9.53713e-09	9.44486e-09	1.23099e-11	4.68921e-12	8.5849e-11	1921.67	0.000235446	0.000430788	0.000424853	4.69669e-05	0.000500702	0.0797104	1.55461	0.00338993	0.0723357	0.700818	6.63363e-06	0.00566852	0.015532	416.501	0.00164182
6.25476e-13	1.4818e-12	2.18584e-14	6.92929e-16	1.14511e-17	7.7489e-13	3.15574e-14	8.85693e-14	3.82627e-10	1.94265e-11	1.42828e-12	3.60077e-09	6.60876e-13	2.47488e-08	1.62335e-16	6.68316e-15	8.39678e-13	7.94265e-13	1.52114e-10	9.23515e-08	1.13426e-13	3.12077e-12	4.89428e-11	4.57152e-13	8.22254e-15	5.57373e-10	7.63726e-13	2.96153e-13	1.44875e-12	8.13443e-09	1.07143e-08	1.62378e-11	4.51803e-12	1.00837e-10	2333.82	0.000226402	0.000453609	0.000514693	5.18698e-05	0.000602939	0.0498228	0.936593	0.00344017	0.0760135	0.61757	6.33559e-06	0.00817554	0.0147261	429.672	0.00227204
6.24737e-13	1.14529e-12	1.28712e-14	9.95856e-16	1.77993e-17	7.7902e-13	4.5366e-14	7.48608e-14	3.1662e-10	1.83394e-11	1.37642e-12	3.248e-09	5.76976e-13	3.57695e-08	1.67684e-16	6.72107e-15	5.19842e-13	8.17898e-13	1.35265e-10	9.2664e-08	2.43312e-13	3.69429e-12	5.17265e-11	4.60322e-13	1.20521e-14	4.56576e-10	7.31342e-13	2.35487e-13	1.55683e-12	1.38029e-08	1.05537e-08	1.28231e-11	4.52246e-12	8.35912e-11	1957.83	0.000227036	0.000441226	0.000549795	4.51633e-05	0.00040068	0.0687859	2.03152	0.0040992	0.0884805	0.740342	4.93173e-06	0.00519642	0.0146983	472.752	0.00160376
6.247e-13	1.31524e-12	1.12968e-14	9.60618e-16	2.35278e-17	7.9036e-13	3.62858e-14	7.93426e-14	3.19024e-10	2.13878e-11	1.39603e-12	4.18974e-09	4.0751e-13	2.65601e-08	1.66716e-16	5.41554e-15	6.23561e-13	8.32634e-13	1.70191e-10	7.57272e-08	3.0658e-13	3.14919e-12	5.21864e-11	4.64352e-13	1.378e-14	4.3951e-10	7.10095e-13	2.60508e-13	1.68727e-12	1.05709e-08	1.08233e-08	1.08965e-11	4.77362e-12	9.31467e-11	2149.8	0.000232225	0.000451756	0.000346086	4.7453e-05	0.000575098	0.0859101	1.60334	0.00350064	0.0627723	0.525023	5.94042e-06	0.00682671	0.0166871	533.576	0.0016493
6.2535e-13	1.28639e-12	1.06185e-14	9.85747e-16	2.44309e-17	7.87833e-13	3.44882e-14	7.49541e-14	3.34341e-10	2.16732e-11	1.44216e-12	3.78577e-09	5.81578e-13	3.09551e-08	1.79304e-16	6.47012e-15	7.61377e-13	7.895e-13	1.48453e-10	8.45337e-08	1.96964e-13	2.90261e-12	4.52437e-11	4.33996e-13	1.19224e-14	4.32142e-10	7.05027e-13	2.84007e-13	1.55089e-12	9.53713e-09	9.44486e-09	1.23099e-11	4.68921e-12	8.5849e-11	1921.67	0.000235446	0.000430788	0.000424853	4.69669e-05	0.000500702	0.0797104	1.55461	0.00338993	0.0723357	0.700818	6.63363e-06	0.00566852	0.015532	416.501	0.00164182
6.2535e-13	1.28639e-12	1.06185e-14	9.85747e-16	2.44309e-17	7.87833e-13	3.44882e-14	7.49541e-14	3.34341e-10	2.16732e-11	1.44216e-12	3.78577e-09	5.81578e-13	3.09551e-08	1.79304e-16	6.47012e-15	7.61377e-13	7.895e-13	1.48453e-10	8.45337e-08	1.96964e-13	2.90261e-12	4.52437e-11	4.33996e-13	1.19224e-14	4.32142e-10	7.05027e-13	2.84007e-13	1.55089e-12	9.53713e-09	9.44486e-09	1.23099e-11	4.68921e-12	8.5849e-11	1921.67	0.000235446	0.000430788	0.000424853	4.69669e-05	0.000500702	0.0797104	1.55461	0.00338993	0.0723357	0.700818	6.63363e-06	0.00566852	0.015532	416.501	0.00164182
6.25559e-13	1.33614e-12	1.17305e-14	9.71381e-16	2.74332e-17	8.0414e-13	3.91605e-14	9.872e-14	3.62925e-10	2.3701e-11	1.35716e-12	3.70133e-09	5.3709e-13	2.91054e-08	1.27994e-16	6.42974e-15	8.02367e-13	7.97864e-13	1.29781e-10	7.99615e-08	1.98701e-13	3.17865e-12	4.80076e-11	4.7306e-13	1.21561e-14	2.11873e-10	7.79168e-13	2.42239e-13	1.26559e-12	1.1765e-08	1.0339e-08	1.34471e-11	4.5182e-12	8.39386e-11	1730.55	0.000219355	0.000425438	0.000399452	4.86611e-05	0.000477776	0.0885168	1.58369	0.00389822	0.0714895	0.626687	7.16555e-06	0.00590618	0.0153853	440.643	0.00146339
6.21326e-13	1.29566e-12	1.06032e-14	9.50952e-16	2.87297e-17	7.55363e-13	5.1601e-14	6.69276e-14	3.89887e-10	2.06013e-11	1.41046e-12	3.79292e-09	5.73873e-13	3.16618e-08	1.76414e-16	6.61774e-15	7.50654e-13	7.70045e-13	1.48384e-10	8.89401e-08	2.4663e-13	2.92443e-12	4.61925e-11	4.23812e-13	9.94147e-15	4.18123e-10	6.60297e-13	2.71898e-13	1.45949e-12	7.90273e-09	9.87592e-09	1.07667e-11	4.48896e-12	7.83686e-11	1931.46	0.000227822	0.000438932	0.000415783	4.87403e-05	0.000570311	0.082745	1.6428	0.00333043	0.122821	0.557745	6.51552e-06	0.0061965	0.0194622	486.368	0.00187976
6.2515e-13	1.30442e-12	1.09128e-14	9.52276e-16	1.85592e-17	7.14122e-13	3.25379e-14	9.24874e-14	3.71291e-10	2.29655e-11	1.38383e-12	3.83365e-09	5.2031e-13	4.19804e-08	1.47827e-16	6.73438e-15	9.06952e-13	8.5217e-13	1.36016e-10	8.4347e-08	1.66339e-13	2.6677e-12	4.70274e-11	4.53403e-13	1.23547e-14	3.8204e-10	7.89976e-13	2.38918e-13	1.60298e-12	8.58913e-09	1.1447e-08	1.25377e-11	4.47354e-12	1.00091e-10	2030.52	0.000229369	0.000434927	0.000390774	3.94687e-05	0.000484056	0.0867222	1.62581	0.00301529	0.0640838	0.763684	6.40895e-06	0.00504145	0.0179589	455.911	0.0017897
6.25566e-13	1.39487e-12	1.22636e-14	1.13869e-15	2.36363e-17	7.40142e-13	2.39944e-14	7.71884e-14	3.097e-10	1.87184e-11	1.43233e-12	3.52275e-09	5.02963e-13	3.20066e-08	2.08748e-16	7.29347e-15	8.23153e-13	8.16927e-13	1.4148e-10	7.35409e-08	2.14657e-13	2.64898e-12	5.19012e-11	4.41344e-13	1.17577e-14	3.97935e-10	6.87382e-13	2.65143e-13	1.51378e-12	8.58909e-09	8.11724e-09	1.56565e-11	4.66676e-12	1.15393e-10	3340.4	0.000222424	0.000427922	0.000405008	4.86672e-05	0.000553909	0.0902732	1.45402	0.004004	0.0835674	0.789358	9.3029e-06	0.00551988	0.0144678	403.419	0.00154623
6.25323e-13	1.35287e-12	1.19653e-14	9.59718e-16	1.42363e-17	7.57611e-13	3.88651e-14	8.4547e-14	3.12307e-10	1.9387e-11	1.42317e-12	2.97768e-09	5.12488e-13	3.0453e-08	2.29918e-16	5.90172e-15	7.53636e-13	7.6363e-13	1.47572e-10	7.99706e-08	1.77978e-13	3.29707e-12	4.641e-11	4.21116e-13	1.13301e-14	3.71483e-10	6.69943e-13	2.92694e-13	1.49285e-12	1.26623e-08	1.03876e-08	1.39405e-11	4.19241e-12	7.2614e-11	1971.63	0.000229617	0.000460581	0.000411303	4.83023e-05	0.000516837	0.0788525	1.43559	0.00338567	0.0703949	0.636317	6.67879e-06	0.00736407	0.0167614	352.56	0.00153093
6.25534e-13	1.2301e-12	1.16799e-14	1.03929e-15	2.8841e-17	8.19645e-13	2.95976e-14	7.95291e-14	2.58021e-10	1.92612e-11	1.41976e-12	3.85319e-09	6.20746e-13	2.59079e-08	1.86323e-16	6.42276e-15	6.82444e-13	8.25249e-13	1.43245e-10	8.61606e-08	3.92165e-13	3.28097e-12	4.11608e-11	4.29206e-13	1.14951e-14	4.36665e-10	6.78124e-13	2.75694e-13	1.62788e-12	8.48778e-09	1.05102e-08	1.1386e-11	4.55869e-12	7.30078e-11	2025.02	0.000238994	0.000448637	0.000321913	4.61155e-05	0.000455358	0.0647579	1.54679	0.00251608	0.0702867	0.616366	6.25864e-06	0.0064684	0.0123248	393.715	0.00137933
6.25051e-13	1.52198e-12	1.24528e-14	9.27743e-16	2.83436e-17	8.39335e-13	4.03716e-14	7.43901e-14	3.65463e-10	2.05924e-11	1.41221e-12	4.34635e-09	4.53574e-13	2.82229e-08	2.03548e-16	5.61371e-15	6.75069e-13	8.06496e-13	1.65012e-10	8.27057e-08	1.89422e-13	3.45995e-12	5.17849e-11	4.43639e-13	1.19565e-14	3.90778e-10	7.30156e-13	2.77712e-13	1.66881e-12	9.96755e-09	9.21443e-09	1.42912e-11	5.04235e-12	7.90577e-11	1874.67	0.000240578	0.000440334	0.000434054	6.08397e-05	0.000519731	0.0953537	1.19413	0.00320877	0.0645831	0.535138	6.936e-06	0.00752588	0.0154886	328.63	0.00156597
6.25454e-13	1.38581e-12	1.16937e-14	8.38673e-16	2.62313e-17	8.44154e-13	3.31992e-14	7.37717e-14	3.38516e-10	1.98187e-11	1.39898e-12	1.98455e-09	5.5244e-13	3.4771e-08	1.69834e-16	6.78605e-15	6.005e-13	8.43351e-13	1.75393e-10	8.65261e-08	1.82094e-13	3.25774e-12	4.63933e-11	4.6709e-13	1.09139e-14	3.83784e-10	7.32989e-13	2.59371e-13	1.34646e-12	8.09579e-09	1.09217e-08	1.20052e-11	4.54771e-12	1.01211e-10	1926.65	0.000236223	0.000425003	0.000461601	4.47367e-05	0.000405434	0.0887082	1.45921	0.00279645	0.0714658	0.515031	5.93729e-06	0.00664448	0.0165985	487.936	0.00150688
6.24959e-13	1.0829e-12	1.10412e-14	1.01125e-15	1.95531e-17	7.8889e-13	3.2271e-14	6.79184e-14	3.25035e-10	2.53862e-11	1.42509e-12	3.46883e-09	5.6943e-13	4.41182e-08	1.61031e-16	8.22212e-15	8.43671e-13	8.03536e-13	1.65472e-10	8.0513e-08	1.78437e-13	2.66022e-12	4.0676e-11	4.54604e-13	1.34884e-14	4.97407e-10	6.8486e-13	2.52386e-13	1.15727e-12	1.41178e-08	1.04556e-08	8.93289e-12	5.055e-12	9.75877e-11	2456.17	0.000223539	0.00043198	0.000407382	6.51728e-05	0.000381715	0.0502477	1.84502	0.00303387	0.0909774	0.909837	6.97612e-06	0.00577051	0.0196691	439.97	0.00145562
6.25221e-13	1.40631e-12	1.50693e-14	6.63653e-16	2.81552e-17	7.71733e-13	3.62316e-14	6.5811e-14	3.3063e-10	2.15391e-11	1.42138e-12	4.12154e-09	6.13282e-13	3.24919e-08	7.35146e-17	6.3811e-15	7.41887e-13	7.45184e-13	1.16078e-10	8.40896e-08	1.7784e-13	3.64285e-12	4.83091e-11	4.07323e-13	8.94254e-15	4.43625e-10	6.44965e-13	2.6802e-13	1.76656e-12	8.54207e-09	8.4064e-09	1.22003e-11	5.00014e-12	9.84244e-11	2331.46	0.000227644	0.000468774	0.00045313	5.23085e-05	0.000692779	0.0690923	1.15705	0.00226443	0.0731183	0.788967	6.47784e-06	0.00583091	0.016037	454.065	0.00140043
6.21334e-13	1.31655e-12	1.14396e-14	9.98904e-16	2.66943e-17	7.58542e-13	3.48601e-14	7.11039e-14	3.08305e-10	3.0223e-11	1.3842e-12	4.48225e-09	5.28822e-13	3.26606e-08	1.97277e-16	7.43772e-15	5.36744e-13	7.87416e-13	1.86602e-10	5.67305e-08	1.99248e-13	3.14484e-12	4.48085e-11	4.23139e-13	1.21844e-14	4.33861e-10	6.82535e-13	2.61504e-13	1.45493e-12	1.09657e-08	9.95196e-09	1.1079e-11	4.57487e-12	8.94046e-11	1787.4	0.000235793	0.000443876	0.000456759	4.41896e-05	0.000647007	0.0727234	1.404	0.00330893	0.113992	0.527001	6.45644e-06	0.00525279	0.0128438	419.762	0.0012315
6.2535e-13	1.28639e-12	1.06185e-14	9.85747e-16	2.44309e-17	7.87833e-13	3.44882e-14	7.49541e-14	3.34341e-10	2.16732e-11	1.44216e-12	3.78577e-09	5.81578e-13	3.09551e-08	1.79304e-16	6.47012e-15	7.61377e-13	7.895e-13	1.48453e-10	8.45337e-08	1.96964e-13	2.90261e-12	4.52437e-11	4.33996e-13	1.19224e-14	4.32142e-10	7.05027e-13	2.84007e-13	1.55089e-12	9.53713e-09	9.44486e-09	1.23099e-11	4.68921e-12	8.5849e-11	1921.67	0.000235446	0.000430788	0.000424853	4.69669e-05	0.000500702	0.0797104	1.55461	0.00338993	0.0723357	0.700818	6.63363e-06	0.00566852	0.015532	416.501	0.00164182
6.2535e-13	1.28639e-12	1.06185e-14	9.85747e-16	2.44309e-17	7.87833e-13	3.44882e-14	7.49541e-14	3.34341e-10	2.16732e-11	1.44216e-12	3.78577e-09	5.81578e-13	3.09551e-08	1.79304e-16	6.47012e-15	7.61377e-13	7.895e-13	1.48453e-10	8.45337e-08	1.96964e-13	2.90261e-12	4.52437e-11	4.33996e-13	1.19224e-14	4.32142e-10	7.05027e-13	2.84007e-13	1.55089e-12	9.53713e-09	9.44486e-09	1.23099e-11	4.68921e-12	8.5849e-11	1921.67	0.000235446	0.000430788	0.000424853	4.69669e-05	0.000500702	0.0797104	1.55461	0.00338993	0.0723357	0.700818	6.63363e-06	0.00566852	0.015532	416.501	0.00164182
6.24026e-13	1.22924e-12	1.22738e-14	9.97776e-16	2.35382e-17	7.63236e-13	2.83736e-14	6.17429e-14	2.87177e-10	2.16704e-11	1.35663e-12	3.88157e-09	5.15657e-13	3.49612e-08	1.44507e-16	6.70009e-15	9.10314e-13	8.35185e-13	1.42077e-10	9.58995e-08	1.87659e-13	2.82689e-12	4.65785e-11	4.62135e-13	1.14511e-14	2.82789e-10	7.80095e-13	2.00913e-13	1.38759e-12	9.95276e-09	9.42182e-09	1.35614e-11	5.40062e-12	7.99672e-11	1956.99	0.000216434	0.000436586	0.000370395	3.87784e-05	0.000607248	0.0730994	1.57975	0.00344539	0.0798623	0.608219	5.9315e-06	0.0062725	0.0148744	428.387	0.00137427
6.21341e-13	1.25453e-12	1.40587e-14	1.14807e-15	2.19318e-17	7.22517e-13	3.49755e-14	7.20047e-14	3.12755e-10	2.31203e-11	1.34094e-12	5.87348e-09	6.29605e-13	3.40184e-08	1.68495e-16	6.87312e-15	7.19113e-13	8.27128e-13	1.62479e-10	5.92801e-08	2.03725e-13	3.05802e-12	4.05461e-11	4.64208e-13	1.32539e-14	4.89602e-10	7.36051e-13	1.98668e-13	1.74412e-12	1.22656e-08	1.05945e-08	1.14724e-11	5.26165e-12	7.69347e-11	1849.55	0.000230332	0.000455591	0.000373971	5.11247e-05	0.000496324	0.0840719	1.69819	0.00383217	0.0726377	0.852766	6.42195e-06	0.00575907	0.015929	448.164	0.00141517
6.24952e-13	1.2219e-12	1.12976e-14	9.79339e-16	2.38138e-17	7.82253e-13	4.20695e-14	8.73107e-14	4.12538e-10	1.95102e-11	1.3413e-12	4.46875e-09	4.94507e-13	2.97896e-08	1.88851e-16	6.50661e-15	5.14355e-13	8.14795e-13	1.62568e-10	9.34137e-08	2.05101e-13	2.80153e-12	4.76949e-11	4.47872e-13	1.21399e-14	4.51983e-10	7.00608e-13	2.2328e-13	1.41516e-12	9.06699e-09	1.04158e-08	1.14189e-11	4.94704e-12	9.84515e-11	1716.44	0.000236055	0.000440492	0.000378094	4.13083e-05	0.000509664	0.0565211	1.41062	0.00346062	0.0874968	0.636585	3.74736e-06	0.00580441	0.0171714	537.7	0.00143343
6.24713e-13	1.53098e-12	1.10143e-14	1.03504e-15	2.75808e-17	7.72923e-13	3.48694e-14	8.54896e-14	3.10305e-10	2.02213e-11	1.42711e-12	3.70848e-09	6.91076e-13	2.33828e-08	1.67683e-16	7.05922e-15	7.02195e-13	7.79993e-13	1.45883e-10	7.89788e-08	1.84518e-13	4.15607e-12	4.87388e-11	4.7732e-13	1.15777e-14	3.12194e-10	7.6874e-13	2.81475e-13	1.40689e-12	1.18843e-08	1.05107e-08	1.17325e-11	3.64678e-12	9.51582e-11	1564.51	0.000233421	0.000453984	0.000305383	4.20662e-05	0.000440855	0.0746875	1.01713	0.00304698	0.0592967	0.695771	4.73439e-06	0.00585838	0.0179078	449.586	0.00168609
6.24269e-13	1.5148e-12	1.12596e-14	8.34501e-16	4.10144e-17	7.36128e-13	3.76466e-14	8.42622e-14	2.57382e-10	1.91897e-11	1.39888e-12	2.93579e-09	3.78e-13	2.77318e-08	2.20235e-16	5.32198e-15	8.1494e-13	8.47624e-13	1.42048e-10	8.77655e-08	2.26992e-13	2.87595e-12	4.9683e-11	4.76033e-13	9.75935e-15	4.442e-10	7.24525e-13	2.50821e-13	1.75235e-12	1.24779e-08	9.958e-09	1.52876e-11	5.14884e-12	8.74326e-11	1613.75	0.000214718	0.000460105	0.000682333	4.53717e-05	0.00052953	0.0944984	1.2197	0.00309488	0.058692	0.835565	7.22256e-06	0.00560996	0.0146363	424.226	0.001658
[truncated: 1,877 more rows]
[truncated: 75 more columns]

## Sheet: Parameter Boundaries Segregated
Name	Mathtype	Value	Q95%
km_Glcx		9.78e+00	4.52e+00-1.25e+01
mu_max		4.20e-04	3.46e-04-4.73e-04
Y_XGlcx		6.02e-09	4.96e-09-1.32e-06
m_Glcx		4.28e-04	1.70e-04-4.49e-04
alpha		3.66e+05	3.08e+05-5.93e+05
[truncated: 3 more rows]

## Sheet: Bootstrap results Segregated
km_Glcx	mu_max	Y_XGlcx	m_Glcx	alpha	k_dmin	k_dmax	beta
[truncated: 2,538 more rows]
